# Supplementary material
Source: publisher figshare collection journal article supplement (https://sage.figshare.com/ndownloader/files/17830067)
Supplement: Supplementary file 1 [file 17830067]

## Sheet: TableS1
Table S1. The mouse S1500+ gene list, representing 3045 probes and 2754 genes.
BioSpyder_ProbeID	Probe_sequence	Reference_Ensemble_Targeted	Mouse_Symbol
0610010K14RIK_31619	GAGTTTCTTGGCTGGAGGAGTTTCTCCTAGCCCTTCGACATCCACCAGGT	ENSMUST00000108578	0610010k14rik
0610010K14RIK_31873	ACACAGCTGATGTGATTAAGATCGTCCCCAAAGCGCTTCACAGCAGCCCT	ENSMUST00000108578	0610010k14rik
1110018F16RIK_30047	TGGCAAAGGAACAATGGAGAATCACAAAGCTGGCAACTGCTACCGGTGTG	1110018F16RIK	1110018f16rik
1300017J02RIK_31203	ACACGCCAAAGCACCACCGCTCACAGCACTCCACTGGTCACATTTGGTCC	ENSMUST00000035163	1300017j02rik
1300017J02RIK_32004	GAAACTCATATCCCAAGTACAGACTGATGTCTATCTTTCGAGGGACCCTT	ENSMUST00000035163	1300017j02rik
1810009A15RIK_30815	TCGTCTATCACAGCCCCGACCACCTGGCGTTTCCGTCGCCGATCCCTGCT	ENSMUST00000096251	1810009a15rik
2010309G21RIK_29518	CCTTCATGTGTAACTTGACAGGTAAAACTGTTGTGAGATCTCCACTGGTC	2010309G21RIK	2010309g21rik
2210016H18RIK_29188	GATCCTCTTGCTTCTGTTCACAAATTCTCCAAGGCTTACAAGCACATGAA	2210016H18RIK	2210016h18rik
2310002L09RIK_31482	GCAGACGGACAAACACATTACTGCTGCAGTGGTTCATCATGTGCAAATGG	ENSMUST00000030101	2310002l09rik
2510003E04RIK_29335	ATTCAACACAGCAACAGGCTCTTCTACCAGGTACACTACCCAGTGTTGTT	2510003E04RIK	2510003e04rik
2600001M11RIK_30179	CTTACATTTCCTGCATCATCTCCATTGATGGTCACTGTCACAACATGTGT	2600001M11RIK	2600001m11rik
2610507B11RIK_29766	TCTTGTCGCCCACACTTAAACCAATGAGGAGCCGAGCTTTCTCTTCTTCC	ENSMUST00000010421	2610507b11rik
2610528J11RIK_32135	CTCCAATCATGGATAGACCTGATGTAGGTGAGCCTTGGCCTCTGCCAGAA	ENSMUST00000106367	2610528j11rik
2810037O22RIK_30853	ATGCAGGTTGTTTAGCATCCGTGACTAAGGAAACCCAAGCAGAAACTCCA	2810037O22RIK	2810037o22rik
2810403A07RIK_30644	GCCTGAGGAACTTGCCGGCTTCGATCCTGCGCCTTCTATCTCATTCTGAC	ENSMUST00000029696	2810403a07rik
2810417H13RIK_31660	TCTTTCCCGCGCGCTCCAAGCGCTTGAGAACCTCGATTCTTATTGGTTCC	ENSMUST00000045802	2810417h13rik
2900092D14RIK_31763	CAAAACATCAAACAAACAAACAACAAAACAAAACAAAACCTCGCCCTTAA	2900092D14RIK	2900092d14rik
3110035C09RIK_29838	CTTTAGGAACACATATACATTTACAATGGTAACATATCATGACAAGCCAT	3110035C09RIK	3110035c09rik
4732423E21RIK_30068	GAGCCCTGCAGCCAGTGTCTGTAATTAAACCGCTAAGAGTTCAAATTTCC	4732423E21RIK	4732423e21rik
4833414E09RIK_29622	ATTCATTGCTTTGACTTTCCCTGCTAACTCTTTAGCGTGCTAACTGTCCT	4833414E09RIK	4833414e09rik
4833423F13RIK_31187	CCCTCATCATTGACCTCAAATGTTTATCTTCTCACCATGCTTCCACATGT	4833423F13RIK	4833423f13rik
4921509J17RIK_30120	TCCCTCTCTGAGTGTCATTTAGATTATTTATGTAATGACAAGACTGGATT	4921509J17RIK	4921509j17rik
4930579G24RIK_31404	CCACGTCTTAAGGAAGCGTGCATTTTCTGTACATTTCAGGGCAAGTTCTT	ENSMUST00000029388	4930579g24rik
4931406P16RIK_30997	GCAGTGATGGCTGCTGTGGTTGCATGGTTCCTGTCTTCTGTTCAGTCACC	ENSMUST00000108074	4931406p16rik
4933413G19RIK_31725	CAGGTGTGCTCGGCTGCATCCTTACTAGGATAGAGTACCTGGTGACGCAC	ENSMUST00000130785	4933413g19rik
4933427D14RIK_31652	CCACTTGCTCCAGCTTCCCTGGCTTTTCCAAACCTGCTGCTGAAGAACGT	ENSMUST00000108505	4933427d14rik
5230400M03RIK_30156	ACACAGCTGCCAGAACAGTTAAAGTGGTAAACTCTTTCCACAGCCTCCAC	5230400M03RIK	5230400m03rik
5330431K02RIK_30502	CTGGACTCGGAGTCCTGTGGTGTCTGTGGCACGAGGCTTTTGATACCTGT	5330431K02RIK	5330431k02rik
5830408B19RIK_30113	GTGGCAAGCCTGTGAAGAACCTAATTGGGACATTGCTGTGAACAATATCA	5830408B19RIK	5830408b19rik
5830411K21RIK_32193	AATGGAGACTTTCCAGTAAGCACTTTAGGATAAAGGCAGGAAACGAATGG	5830411K21RIK	5830411k21rik
5830417I10RIK_29689	TGAGCTGTAGAGCCATCTCCATTCTTGCTCTGTCCTCAAGGTCTCCACGA	5830417I10RIK	5830417i10rik
6330403K07RIK_30546	CTCTTCATCTTGGTATCACAGCTTTAGAAGGCCTCCAGGCTGAAATGAAG	ENSMUST00000156068	6330403k07rik
6330417A16RIK_31783	TCCGTAGGATGTCTCTTGATCAACTGTGTCTTTTGCTGTGGAGAAACTTT	6330417A16RIK	6330417a16rik
6330564D18RIK_31513	ATCTCCCAGAGAGCAGCAGTGCATTGACCTTGGAAACTTGCTGGCAAACG	6330564D18RIK	6330564d18rik
9430037O13RIK_30276	GGTGATTCCTGGACAGGTACAGCCCCACATGTTCCATTCTAAAGTGCTAC	ENSMUST00000192556	9430037o13rik
9630033F20RIK_31540	ATGGTGTGGATGCTGGACTTTCTATACAATGGAGATGACAGCCAGAGGAA	9630033F20RIK	9630033f20rik
A130071D04RIK_30094	TTATTAACGGCTGAATTCCAAACCCCTTTGTAAACTTCCAAACACTTAAA	ENSMUST00000194467	A130071d04rik
A230046K03RIK_30636	GTAAGGTTCATGGTTTGGAGTAGTTTTTCATCTTGACTAGTTGACTGCAC	ENSMUST00000038388	A230046k03rik
A2M_29797	TGGAAGGTGGTGTGAGCTTTGAGATCCTCACAAGTCCCAGGCAGAGTCTG	ENSMUST00000032203	A2m
A430093F15RIK_30906	AGTACCGTGGAACGAGCCTACAGCTTGAACTTGCTGGCTGACATTCTGTC	ENSMUST00000188480	A430093f15rik
A630071D13RIK_30514	TCTCTAGAGGTGGAGGCAGGAGGATTGTCAGAAGCTCAAGATCAGCAAGT	A630071D13RIK	A630071d13rik
A730034C02_30574	TCAGTTCCTAAAGGAACTTGGCCTTTGAAACTCATCATAGACTCGGATCC	A730034C02	A730034c02
A730054J21RIK_30998	CATCAACTGGTGACATGAAACCATTAAGCTGTGTGCAATTCCCTGGTGTG	A730054J21RIK	A730054j21rik
A830010M09RIK_30566	CTTGTACAGACTAACTTTGAGGTCTGTTAATCTGCAGTCAGATTTTACCT	A830010M09RIK	A830010m09rik
A830039N20RIK_31109	TCCAGTTCCTGTCTGGTTACATAATTCATCATAGCCACAGTCACCATGCC	ENSMUST00000145596	A830039n20rik
A930009E05RIK_31751	AGATGCAGTCAGTTTCAGTGAAGTCCCCAAACGCTCGCTCTCTGCTTCCT	A930009E05RIK	A930009e05rik
A930011O12RIK_30739	GACACATACGAACACTGGTTCACATAGACTGGCCAGTCCAGAACACTCCC	A930011O12RIK	A930011o12rik
AA415038_29464	CTCAGCATATACCTCCAAGGACAATTTCTGTCTAACAATGAAGACAGCCA	AA415038	Aa415038
AAAS_29616	CAGATGATTGTCCTGGAAGAGGGTCCCAAGGAGCAGAGGTTGGTGATGTC	ENSMUST00000041208	Aaas
AADAT_30613	TGCTGGAGTAGCCAGAGAGAAGGATGCTCTGAAGAAGGAGGTAGGAGCTG	ENSMUST00000079472	Aadat
AARS_29893	GGAACCTGGCACAAGCACGTGATCTTGCCAGCCTCATTGTCCACCGTGAA	ENSMUST00000034441	Aars
AASDH_32111	CACCACACAATAAATCCAGACAGTAAATATAATTGTTTCTGCACCCAATA	ENSMUST00000120963	Aasdh
AATF_31568	TGGTCTGTGTCCTCCGAAGCAATCTTTCTTTGTCCATCATGATATGATCG	ENSMUST00000018841	Aatf
AB124611_31774	ACACCATATTGACAGCAGAAGTTCCCCCCAGCAGCCTCACCGCCACCACC	ENSMUST00000086361	Ab124611
ABCB11_29712	ACATGACGGCGATGATATCTGAGTTCTGGATAGTAGACAAGCGATGAGCA	ENSMUST00000102709	Abcb11
ABCB1A_29435	ACTAAGCTTCCTGTCTTGGTCATGTGGTCCACAGATGCTTTTGCGAGTTG	ENSMUST00000047753	Abcb1a
ABCB6_31280	GTGCTATGACGATGGTGGTGCGGTTGGTGCAGACTTTGGCCAGAGAGGCC	ENSMUST00000027396	Abcb6
ABCC1_30046	AGAATACTCCTTCAGTCTCTCCACTGCCACAATGTTGGTCTCCATCTCCG	ENSMUST00000100167	Abcc1
ABCC2_29701	ATTAAAGGCAAGTCTCCTGACCTTTCATCCTGACAACTTAATAGTTAACT	ENSMUST00000026208	Abcc2
ABCC3_30114	CCCTGCACATGAACAGTCACGTTCTTCAGCACCAACTCGAGGCCAGGCCG	ENSMUST00000178136	Abcc3
ABCC4_30363	CCACATTTGCAGTTGCTTCATCAATGATCAGTATTCGGTTATTCTTTAGA	ENSMUST00000036554	Abcc4
ABCC5_30220	CAGTAGAGGAAATGCATGGCAGAGCCATATCTGCTTCCAGAGTCTGGAGT	ENSMUST00000096199	Abcc5
ABCC5_32060	TGAAGCCAGCCAACTGCGTGATCATCAGGCACACGATGGACAGGATGAGC	ENSMUST00000096199	Abcc5
ABCC9_30839	GAGTCTGAAACGATGCCTTCCGCTATCTCACAAACATGCACAAACAGGAG	ENSMUST00000204870	Abcc9
ABCD1_29413	GAACTGTTCCAGCATGACATACCATAGGCGCTCAAGCAGGATGAGGTTGA	ENSMUST00000114461	Abcd1
ABCF1_29590	TTCCGCTTGCTTGGTGGACTTGCCCCCAGCCTTCAGCTCCTTCAGTTTCT	ENSMUST00000043757	Abcf1
ABCF3_30465	CCGGACACTTCTTGCAATAGTTCCCCGACAGCTTCCACCAGGTCATCCAC	ENSMUST00000003319	Abcf3
ABCG1_29054	AGGATGGCCTCTGACTTCTGGAAGTGGCATGTCTCCGCGATGTCGCAGTG	ENSMUST00000024829	Abcg1
ABCG2_30082	TTTCAGGACGACAGTAGTGAATATCTGTTAGCTGGTTATCCTGAATCAAG	ENSMUST00000031822	Abcg2
ABCG2_31832	TCATCCTAGGAAGGCCGTTGTTGTTTCTCTGCGACATTGGTACTAACACG	ENSMUST00000031822	Abcg2
ABHD4_30597	GGCGCTTGGCCCGTATAAGCATAGTTCTCACTGCGGAGGAACTTGACCTG	ENSMUST00000180359	Abhd4
ABHD4_31836	GCCACTCGAAGAACAGCCAGTGGATTGGAACGTCCCAGGACAGATGCCAC	ENSMUST00000180359	Abhd4
ABHD6_30544	ATGGATGGCTTGTGTCCTGGCCTGCCCCGGAAGGAGTAACAGAACTGATA	ENSMUST00000166497	Abhd6
ABL1_29114	AGTCCACATAGCTCACACAGAAAGTGTACAGGTTCTTGCCAGCCTCCAGT	ENSMUST00000075759	Abl1
ABRA_31246	CATTGTGCGGATAACAAAGCACAGTTCCATAATTTCCCGATAGATGTGCT	ENSMUST00000054742	Abra
ACAA1A_29428	TCATCCTGAGACACGGTGATGGTTTTCTTGTCACCCTTGTCATCCAGGAC	ENSMUST00000039784	Acaa1a
ACAA1B_29729	AGGTGGGTCCCACCGATTTGCCAGCGCTCTGGGCGCTCACCCCAGTGAAT	ENSMUST00000010795	Acaa1b
ACADL_30131	CTAGCTGTCACTGACGATCTGTCTTGCGATCAGCTCTTTCATTATTTCGT	ENSMUST00000027153	Acadl
ACADM_31166	TAGTAAGTGTTCCGGCGACCGGAGTCAACCTCCCAGGCTGCTCTCTGGTA	ENSMUST00000072697	Acadm
ACADVL_29377	CTAGCACATTCTCTGATGGCACCTTCACTCCATCAAAGTACACCTCTGAC	ENSMUST00000102574	Acadvl
ACAP1_30592	GTCACAGATGCCAACAACGAAGGCACGACCGGCAGCAAGGTAATGCTGTC	ENSMUST00000001631	Acap1
ACAT2_29872	TCATCTTGTCGCTCTGGTCTCTGCTAGCTCTCAGCCTTGTCCTGTCTGCG	ENSMUST00000007005	Acat2
ACAT2_32053	GTGTGCAGCAAGGTCACTAGAATCCTGCAGCCAGATGCTCCCAGAGGATG	ENSMUST00000007005	Acat2
ACAT3_31219	CTGGGTCGGATCTTGTGTTCATCCTGTTGCTCTCCCCTGGCGTCTGCACA	ENSMUST00000043923	Acat3
ACBD3_30304	TACTGGTGGCTGCCTGCATATACTTCCTCGTGACAGTCCCGCCGGTACAC	ENSMUST00000027780	Acbd3
ACD_29743	GGAGAAGCTGCCGTTTCTTGAAGGAGCACTGGAACTCCAGCTTAGGAGCC	ENSMUST00000042608	Acd
ACE_29814	TTCTCCTCCGTGATGTTGGTGTCGTGCGCCCAACTGGCCACGGTGCTCTG	ENSMUST00000001963	Ace
ACE_31849	ATGGCGGAGGCTGACATGTTAGGCTGGCCTGTGATCAGCTTCATGGCCTC	ENSMUST00000001963	Ace
ACLY_29936	AGCACAGATGATGGTGTTATGGGCTCCAGAGACAGCTGGCCCGTGATCAG	ENSMUST00000107389	Acly
ACLY_31877	CTGCTGTGGGTGGCTGGTTGGGAATGGGCCGGTGGCCCAGGGCCATGCCC	ENSMUST00000107389	Acly
ACMSD_31583	AAGCACACTTTGAGTTTGGGAAACTTCTCAAACACCCCACCCATGATCAT	ENSMUST00000038006	Acmsd
ACO2_31448	AGCTCTTGGTGATGATGGCCCGGCCCCCAAGGTGGCGAGGCTCCAGTGCT	ENSMUST00000023116	Aco2
ACOT10_29366	ACATGGTCTCTCCAGACTGTGGAAATACCTACTATCTCCCGCAGCTTGAC	ENSMUST00000052910	Acot10
ACOT9_29539	ATGAAAGACATTGGTGGTCATATGCTCACGACTGTCAAGAGAAGACACTT	ENSMUST00000026324	Acot9
ACOX1_30274	TCCCCTCCTTTCTGGCTGATCCCATAGAGAGAATATAAGAGACACAGGTT	ENSMUST00000072948	Acox1
ACSM5_30829	TTGGCTGCCTTCCTCGACTGCTTCCCCAGCTCCTCAAATGTCCACTTGAC	ENSMUST00000207387	Acsm5
ACTA1_30104	CAGCCTCGTCGTACTCCTGCTTGGTGATCCACATCTGCTGGAAGGTGGAC	ENSMUST00000034453	Acta1
ACTA2_30581	GCCTTACAGAGCCCAGAGCCATTGTCGCACACCAGGGCTGTGCTGTCTTC	ENSMUST00000039631	Acta2
ACTG2_31054	CCAGAGAGGACATTGTTAGCATACAAATCTTTGCGGATGTCAATGTCACA	ENSMUST00000075161	Actg2
ACTN2_32214	CTCCTCCTGGATCATATACTCATCTTCGTCGTAGACATAGTTGTACTGCA	ENSMUST00000110616	Actn2
ACTN3_29094	GGACTTTGGCCGTAGTCCGTATGTTTGGCAAATCTTCTGGATCTCTCCTT	ENSMUST00000006626	Actn3
ADAM10_30084	TTTCTTCATGCAGCAAACATGGCATAATTCCTTATCATCTTTGCCATCAG	ENSMUST00000067880	Adam10
ADAM8_29923	TCCTCTGGATTTGTCTCGGAGCCTTTCGGTAGATGACGATGCCTGCCACG	ENSMUST00000026546	Adam8
ADAT1_30303	AGTCGGCCTGGACTGTCACCTCTTTTCCTGTGCACCGCACAGCGGCTCTG	ENSMUST00000139820	Adat1
ADAT1_31898	ACCTGATGGAGTCTGGCTGCTCGTCATCTGCAATGCTGCTCAGCAGCTTC	ENSMUST00000139820	Adat1
ADCK3_30248	TCCCCACCAAGGCCCAGGTTCTGCAAGTGGGTTTCCACCGCTGCTTGGGT	ENSMUST00000160879	Adck3
ADCY6_30694	GACCTGGTCATAGGTGCTGGCATTTAGCCCAGAGGCGGCCATGTAGGTGC	ENSMUST00000096224	Adcy6
ADCY7_29692	GACATCACACTCAGTGTAGAACACTTTGAAGTCCGGAACGGATGCAAACA	ENSMUST00000169037	Adcy7
ADH1_31449	GGTTGTCAGCTGATCCCACACGTGATCTGGCCCTTTACGACACACCCTTC	ENSMUST00000004232	Adh1
ADH5_30159	ATGCACCAGCCACCTTACAGCCCATGATCACTGCCAGTCCAACTCCTCCC	ENSMUST00000005964	Adh5
ADI1_31462	TGTCCCTGACATCGAAGTACCCACTACCCTCCAGGATGTAGCGGATCTCC	ENSMUST00000020957	Adi1
ADIPOQ_31488	AGAAGTAGTAGAGTCCCGGAATGTTGCAGTAGAACTTGCCAGTGCTGCCG	ENSMUST00000023593	Adipoq
ADM_30365	AGGAACTGTCGTCTCATCAGCGAGTCCCGTAGGGTAGCTGCTGGATGCTT	ENSMUST00000033054	Adm
ADNP_30970	TCAACTACATCATCTTGGTCTACCTCACTATCAGAGGCATCATGCATTAA	ENSMUST00000057793	Adnp
ADO_30442	TGTCCATGCAGCTGATGCGGACCGTGCCGTACAGCACCTTGAGCATACCG	ENSMUST00000075686	Ado
ADRB2_30408	TGAAATCTGGACTCCGACAGTAGATAAGAGGATTGAAGGCAGAGTTGACG	ENSMUST00000053640	Adrb2
AEN_31672	GTGCTGCCGGCTTCTCCTCTTGTGTCTTCTCCGAACCACATCCTTGGTAT	ENSMUST00000107425	Aen
AFP_31592	GACCATTTCTCCTCGCTGAGCTGGCAGCACGTGGAGGCAATGCTCACCAT	ENSMUST00000042755	Afp
AGL_30760	ACCTGGCTCGGCAAAGTTCCGGAGCGGGTCATCGCCCATCACCCACCCGT	ENSMUST00000040603	Agl
AGMAT_29825	ATGCAGCCCGCAGCGAGGACATTCTGATAGGCCTCTCGAATCAGCAGGCA	ENSMUST00000038161	Agmat
AGT_30825	GTCACATCCAGTGCCTCCGGTGAGCCAGGCTGCTGGACAGACGTGGTCGG	ENSMUST00000063278	Agt
AGXT2_30967	AGGAGTGCTGAGAGCTTCTCTGCATATTCATGCATCGGAGAGTGGAAGAA	ENSMUST00000110541	Agxt2
AGXT2_31965	TGGAGTAGCAAAGGCTTCCGGAAATAGGCTGTATCCACAGGAGAAAGATG	ENSMUST00000110541	Agxt2
AHR_32124	CTGGCACTGATACATGGACATGGCCCCAGCATAGTATGCCTGAGGACTGA	ENSMUST00000116436	Ahr
AHRR_30860	CTGTGGCTACACATGAAGAAGTGATGAGGAGGCTCTGGATCCAGGCAGGT	ENSMUST00000022059	Ahrr
AI256396_31262	TTGCCCAAGAAGTCTTGTCAGAGGTAAAGGCCCTCAAGGCTGTTGTGAAA	AI256396	Ai256396
AI314604_30495	GTCCCTCCTTGTGGCTCTAGGAGTCCCCATGGTGCTATCAAACCAACTTG	AI314604	Ai314604
AI448005_30518	GATCAATGAATTACATCAAAACTACAGGCAACAATTAGTATAAATAAGAC	AI448005	Ai448005
AI506816_29223	GCTTCAGACAATGAGGTGACCGACTCCTCTGGCTCTGAAAGATTGTTCTA	AI506816	Ai506816
AI661384_31503	TACAGTACACTGAGGGATAAGAGCTGCTCTATGCCTACAAATTCAGTCTC	AI661384	Ai661384
AIMP1_29637	CCTTTGTATGTGGCCACACACTCAGCATTGGTGTGCAGGTCAGGCTGGAT	ENSMUST00000029663	Aimp1
AIMP2_30331	ATCAGAGTGAAGCCCAGCTGATACTCGTGGCGGGACTGCTTCCTAGCCTG	ENSMUST00000031613	Aimp2
AKAP8_30169	CTACAGCCTTCACTGCTGCTGTGATCACCTCTGCTAAGACTTCGGCAGCT	ENSMUST00000002699	Akap8
AKAP8L_31490	TGTGGAACTTGCTGTCAAGGTGGCTACCCATCTCATCCTCATAGAAGGTC	ENSMUST00000050214	Akap8l
AKR1B10_30632	GGCTTATGTTTCAGTCCAGGCTTGTTCAGGAGCCTTTCAATCTGGAAGTG	ENSMUST00000038383	Akr1b10
AKR1B8_30048	GAGAGCAGATGTCTGTGTCCTTGTTAATGAGACAGATGGAGGCTTTAACG	ENSMUST00000038406	Akr1b8
AKR7A5_30732	TTGGCAGGATCCAGCCGTTGCTCTTGCAGAGGGTACAGATCTCAGCCACT	ENSMUST00000073787	Akr7a5
AKT1_30988	TCATAGTGGCACCGTCCTTGATCCCCTCCTTGCACAGCCCGAAGTCCGTT	ENSMUST00000001780	Akt1
AKT1_31893	GAGCCTGATCGGAAGTCCATCGTCTCTTCTTCCTGCCTCTTGAGTCCATC	ENSMUST00000001780	Akt1
AKT3_31925	TAAGGTAAGTCCACATCTTGAGGTTTCTCCTTATAGCCTATGAATGAGCC	ENSMUST00000111159	Akt3
AKT3_32208	AGAAATGGTGCTTTGCAGGTCAGTTTTAGGGTTTGGATTCGCTGCTGCTG	ENSMUST00000111159	Akt3
ALAS1_31702	ATGAAGAACAAGGCAGAACAGGTGTAGGAGGCCAGAGGCTCCTCCAGGAG	ENSMUST00000112524	Alas1
ALAS1_32020	AGGAGGTGGTGAAGATGAAGCCCGCAGCGTAGGAGCGGACGGTGTCGATC	ENSMUST00000112524	Alas1
ALAS2_31499	AAGATGAAGCCTGCAGCGTAGGAGCGCACCATGTCCACCAAGTCCCGAGT	ENSMUST00000066337	Alas2
ALCAM_30466	TTCCATTTGCCAAACATGAGGTTCTGAGGTACATCGAGACGGCAAGGCAT	ENSMUST00000168071	Alcam
ALDH1A1_29991	CATGAATCTTGTCAGCCCAGCCTGCACAGTACTTTAATGCTTTTATGCAG	ENSMUST00000087638	Aldh1a1
ALDH2_31423	GTGAACGCCACTTTGTCCACACCCTCATGGGATGCGATGGCAGCCCCGGC	ENSMUST00000031411	Aldh2
ALDH3A2_29772	GGAGGAGGAGACAGGGAAGTCCACCAGATCAGCATCTCTCAAACTCGACT	ENSMUST00000066277	Aldh3a2
ALDH3A2_31955	CCAGGCACACAAACAACAGCATCCCCAGCCTTCCTTTGTTGAACTGCTTC	ENSMUST00000066277	Aldh3a2
ALDH6A1_31602	TCCATTGGTGGTGAAGATGGCAGTTCCATTTCCATATGGGTTGTCATTTA	ENSMUST00000085192	Aldh6a1
ALDH7A1_30977	TCACAGTGGTACACCTTTGCCCAGCTGTTCCCACGGCGGCAAACAGAACT	ENSMUST00000174518	Aldh7a1
ALDH8A1_31392	ACACTGTTAGCTCTCGTAATCACTTCCTCTTCACTATCAAACGGAACAAC	ENSMUST00000042699	Aldh8a1
ALDH9A1_31595	GGCGCACCCGCTTTGGTGTAGATCTCAGCCAGGAGCAGAGCAGACACAGG	ENSMUST00000028004	Aldh9a1
ALDOA_29781	CCTTCAGGTTCTCCTTCTTCCCACCCCAGGCCTTTAGAGCAGAGGCCTGC	ENSMUST00000032934	Aldoa
ALDOB_29517	TGGAAGGACACTGGTCAGCAATCCTCAACACAGCACGCCACTTCCCAAAG	ENSMUST00000029987	Aldob
ALDOC_30272	CAGCACAGCTCACTTTTCCTCTGATTAGCTCGGTCCAAGCTGGAGTAAAT	ENSMUST00000017534	Aldoc
ALDOC_31998	TCTCTGTAACATACTGGCAACGTTTGAGGTCATGGTCTCCGTCAGGCAGA	ENSMUST00000017534	Aldoc
ALOX5AP_31609	AGCACAACGTTGCCCACAGCCTCTTGATCCATGCTTGCTTCAGGCCCGCC	ENSMUST00000071130	Alox5ap
ALOX5AP_32052	GAAGAAGATGAGGTAATGGTTGAGTATCCCGGCGAAGGACATGAGGAACA	ENSMUST00000071130	Alox5ap
ALYREF2_29330	ACCAAAGCCTCCAGAGCCACGGCTCCTTGTCATGCCGCCTCTGTTTCCGC	ENSMUST00000081527	Alyref2
AMDHD1_29709	CATAAGCCGCGTTGATGGTGGCAGCGGCCAAGGCCTCCGGCATGGACATT	ENSMUST00000016034	Amdhd1
AMDHD2_30866	CAGCTTCCTCTGCCTGCCACACCAATTCACCAGAGATGTAAGTGGCCTGG	ENSMUST00000040735	Amdhd2
AMER1_30517	GCTCCTTTGGTTTGAACAGCTTCATCCTGTTGACTCTCCATGATGAAGAC	ENSMUST00000084535	Amer1
AMH_30549	TTTAGCAGCAGCACCACGTGGTTCCCGTAGCGCGGATTACGGTCAGACTG	ENSMUST00000036016	Amh
AMPD1_30838	TTCCACTCATCTGGACTGCGACCGTAGATGGATAAGCGAGGCTCTGCATG	ENSMUST00000090715	Ampd1
AMY1_29877	GCCATCATTGCCAACATAGACTTTTATTCCAGTGCAATTGCCATCGACTT	ENSMUST00000067980	Amy1
AMY2A4_30742	GGTTCATATAGTCAGCCACCTTGGTACGAACATAATCTTTCTCAAGTGCA	ENSMUST00000179568	Amy2a4
AMY2A5_31796	AGATTTTATAGCTGATTGGTTGGTATCTTTCCCACCAAGGTCTTGATGGG	ENSMUST00000098673	Amy2a5
ANAPC2_31019	ACACCTGCAGAATAGATGAGCTGCTGGTCTCGGACCTTCTTCTGCAAGTA	ENSMUST00000028341	Anapc2
ANKRD10_29162	CTGATACAGCAGCACACTCTCTGTCCACGTGCATTCTGTCGGCATCATCT	ENSMUST00000033905	Ankrd10
ANKRD16_30027	CTGGCTTGACTTTGCTCTTACATCTACATCGATGCCAAGACCGCATACCA	ENSMUST00000056108	Ankrd16
ANO10_29445	GATTCTGGAAAGACTGCATTCACTTGTGGTGACATTCCAATCAGAGCACA	ENSMUST00000042546	Ano10
ANP32B_31757	TACATCCTCATCTTCATCCTCATCTTCTTCGTCTTCATCTTCTTCTTCCT	ENSMUST00000102926	Anp32b
ANXA1_29973	TGAGGCACTTCTCAATGTCACCCTTCAGTTCCAGATCCAGAGCTTTGTTC	ENSMUST00000025561	Anxa1
ANXA5_29989	CAGCTCGTAGGCATCGTAGAGTCGTGAGGGCTTCATCATAGCCACAATTA	ENSMUST00000029266	Anxa5
ANXA7_31097	GTAAGCTCCAGGCATCATAGTATGTAGAAGGCATGAACAGCGCAAGGATT	ENSMUST00000065504	Anxa7
AP2M1_31610	ACTCTCGGATCCCAAGATGTCCGCCCGCCCCCAGCTCGCCTGTCTGCTGC	ENSMUST00000007216	Ap2m1
AP3M1_30212	ACCAAGGAGGTCGGCTGGACTAGATAGACACAACGAGCGGAACGGCGTTC	ENSMUST00000154460	Ap3m1
AP3M1_32050	TTCAATTACAAAGAGAGGTGGCACTTCGGTCTGTATCACAGACACAAAGA	ENSMUST00000154460	Ap3m1
APBB2_31625	ATGAAGGCGAATGTGTGGACATCCTTCCCGACACCCATGAAGGACAGGAA	ENSMUST00000087256	Apbb2
APCS_29711	ATTCAACAATGCCAGAGGAGGACTCCCAAGTGGTACATAGGTGTACTGGA	ENSMUST00000027824	Apcs
APEX1_31108	ACAAGAGGCTTTCTGGAAGCCAAGTCCTTTAGAAACTTTCGGAAGGCTTC	ENSMUST00000049411	Apex1
APH1B_31454	ATGCGAGCCTGAACAGCTCTTGGATACAGACAGAGAGCAACACTCCGAAG	ENSMUST00000034934	Aph1b
APLN_32145	CGGTCCGCGGCAGCCCAGAGGAGCCGGCGAGTGGGCGGAGAGGCAGGGCA	ENSMUST00000039026	Apln
APOA1_31604	TCCACATCCTCTTTCCATTTCTTCTGGAATTCGTCCAGGTAGGGCTGCAC	ENSMUST00000034588	Apoa1
APOA5_29365	ACTCAAATGACTATGACCCTGGTCTTGAAGGCCATAGGCAATATCTTCCC	ENSMUST00000121598	Apoa5
APOC3_30821	GACTCAATAGCTGGAGTTGGTTGGTCCTCAGGGTTAGAATCCCAGAAGCC	ENSMUST00000121916	Apoc3
APOE_31528	CCACAGAGGCCTGTATCTTCTCCATCAGGTTTGCCCACTGGCGATGCATG	ENSMUST00000174064	Apoe
APOE_32107	TCCTTAGCCTCCAGGGTCTGAGCAGGGGATCGGATCCCAGACCGGTCCAA	ENSMUST00000174064	Apoe
APOL7C_29640	GTGTCTTTGTTGGTTGGCACCAGGTTCCTGGCTTTAGCTTCAGCAGACAC	ENSMUST00000062562	Apol7c
APP_29787	CAATCACGGTTGCTATGACAACGCCGCCCACCATGAGTCCGATGATGGCG	ENSMUST00000005406	App
APPBP2_29115	ACTGCAGCGTCGGACTCTGCTATGTAAGAGCACCGTCTACTGAAGGAGTA	ENSMUST00000018625	Appbp2
AQP1_29391	AGTTGATGTCGTCAGCATCCAGGTCATACTCCTCCACCTGGCCACTGGTC	ENSMUST00000004774	Aqp1
AQP3_30918	AACAATCCCAGCGCCCAAGAAGGCCCCCAGTGTCTGTGCCAGTGCATAGA	ENSMUST00000055327	Aqp3
AR_31779	ACCTCCTGCTGCTGTTGGTGCTGTTGGTGCTGCTGTTGGTGCTGCTGCTG	ENSMUST00000052837	Ar
ARF1_30946	GGCGTCCCGATCCTCTGTCCGGCCTGCCGCCGAGCTCACTGAGCATAGAC	ENSMUST00000163300	Arf1
ARF1_31811	TGGTGGTCACAATTTCGCCCAGCTTAAGTTTGTATAGAATTGTTGTCTTC	ENSMUST00000163300	Arf1
ARFIP2_29354	TGGCAGCCTCATACTGTTTGACAGTCATGAGTGTGTCTTCCATGGTCTTG	ENSMUST00000131446	Arfip2
ARHGAP1_30239	CCATTTCTTCTACCTACTTCCGGCTTGCTGCCCGGACCAAACAAGGCTTT	ENSMUST00000111329	Arhgap1
ARHGAP1_32095	CTCGTTCCGGCAATGCTTCCTCTGCCACGCCTGTCAAAGCTCGGCAAACA	ENSMUST00000111329	Arhgap1
ARHGAP11A_29483	TGCCTGCCATACTCCAACAAAGAATTAATTCTTCTGACGGACTGACGGAC	ENSMUST00000110949	Arhgap11a
ARHGAP30_31781	CTCAGCCTCATGCTTGTGGACAACTTCCCAGCTCTCCTCAAGAACCAGGT	ENSMUST00000056449	Arhgap30
ARHGAP9_31094	TGTAGGCTCTGCAAGGTTGGTCTCTTGGCGATTAGCCGCTTTAACTTGTT	ENSMUST00000069548	Arhgap9
ARHGEF12_29196	GTACGAAGACCGGATTGTCTCCACTGACTGTCAGCCCGAAGCCATTGTCG	ENSMUST00000072767	Arhgef12
ARHGEF2_30874	CTCCGTGGCCTGCTTCTCAGGAGTTACAGAAGCAACCGCAGCCCGGCCAG	ENSMUST00000175903	Arhgef2
ARHGEF2_31993	ACATCTCAGGCGGTCCAGAACTAATCAGAAACATCCCTTTCGCCTGGTTG	ENSMUST00000175903	Arhgef2
ARHGEF39_29869	GAATGGCCAAAGACCCTGCTAAGGTGACACTGGGACATAGGGTACAGGGC	ENSMUST00000054538	Arhgef39
ARID4B_31769	CATCTTCATCCTCGTCTTCTTCCTCGTCTTCTTCCTCCTCCTCTTCTATT	ENSMUST00000110534	Arid4b
ARID4B_32082	TCACAGCCCTCCAGAGGAACACGGCGGCCGACCTTCAGCGGCTCCCTCCG	ENSMUST00000110534	Arid4b
ARID5B_31689	GGTACGCGTCCCTAGCGGCATACTTGGAGGACTGTTCGTTGTGAAGATGG	ENSMUST00000020106	Arid5b
ARL1_29136	AATCCAACTCTTCATCACCGCGGATTGCAAGCTGTAAGTGACGTGGGGTG	ENSMUST00000109737	Arl1
ARL4C_30751	TTCTGCTTGAGAGACTTCCTGCGTTTCAGGATCATCTCATAGAGCTTGTC	ENSMUST00000187810	Arl4c
ARMCX1_29986	TTACAGTCATGTTGGTAAGGAGTCTTAATCCAGCCATCTGGACGGCTGAG	ENSMUST00000113199	Armcx1
ARMCX2_31332	AGCCCAACTACCTGTACCGCTGAGTTCAGGTTAGAAGCCATAATATCATC	ENSMUST00000035559	Armcx2
ARNT_31093	CCTCTGTACAACAGCTCCTCCACCTTGAATCCCAGGTCCAGGGTTTCCAG	ENSMUST00000107160	Arnt
ARNT2_29145	TTCCCGGCACGCCTGTGATTTCTGTCCTTCTGGCCCTATCTCATAGGTAT	ENSMUST00000209133	Arnt2
ARNT2_31967	CGAGTGCCCGGCAGGGAATGGACTTCCTTGGGAGTAGATCTGCTGGCTGC	ENSMUST00000209133	Arnt2
ARPC3_30321	TCTTGACGGTGTCCGGATTCGATCCAGAGAAGCCGAACTCAGAAAGCGTT	ENSMUST00000102525	Arpc3
ARPC3_31920	TGGGTTTATCACTCTGAGGGTCAAAAACCTTCTCACACAGCCTCAGTCCG	ENSMUST00000102525	Arpc3
ARPP19_29300	CCTGCGACGCCCGAGCACTTCCTCTTTCCCTCAAAGGTTGCGGCTCGCGC	ENSMUST00000168166	Arpp19
ARPP19_31951	AAATCAGACCCTCCAGGCTTTTGTCCCAAGTGAGGATACCTTGCCTTTAA	ENSMUST00000168166	Arpp19
ARR3_30117	GTGCTAGAGGCCAGATTGGTGTCTTCATGCTTGAGTTTGCCATCCAGTGC	ENSMUST00000113769	Arr3
ARRDC4_31686	ACTCCCAGAACCAATGTGGTTTCCTCGAACATTGGCAACCATGTGCCGGA	ENSMUST00000048068	Arrdc4
ARSA_31597	TCGAAATTGAGGAGGAACTGGTGGTAGACAGCGTCGATCTCAGGCAGTCT	ENSMUST00000165199	Arsa
ARXES1_29769	CAGGATCCCAGCAATCGGTATCACTTGCCAGGAGAGAGTCAAAGTGACAT	ENSMUST00000057625	Arxes1
ARXES2_29394	TCTTGCAGGGTGTTCAATCGGCGGCTCCCTCCACGCGGGCTCCACCGGCG	ENSMUST00000058119	Arxes2
ASAH1_29127	GCCTATACAAGGGTCTGGGCAATCTCGAAGGTGACTTTCAAATTGACCTT	ENSMUST00000034000	Asah1
ASB14_29409	GGTAGGAATTTTCTATGAGAACGATACTCACTCAAGATAAAATGTATTTC	ENSMUST00000165929	Asb14
ASCC3_30129	GAGATGGAGAGTTCATTATGTCCTTCAACTAAGTCATCCCATGAGCCTTT	ENSMUST00000035606	Ascc3
ASF1B_30218	TCCCTTCAAATAGCCGGCTCCGCCTTCCAGCCAATCGCCGCTAAGGACCG	ENSMUST00000005607	Asf1b
ASNA1_29329	AGAAGGTGTTGACTTTGTCGGCTCCCCGAACCTCGTGAGGTAACAGTGGC	ENSMUST00000064314	Asna1
ASPM_31354	TCAGCGACTCGGTCTCCAGGCTTCTCTCGGTACACCTGCAGAAGCTCCAG	ENSMUST00000053364	Aspm
ASPN_29620	CAACATTCCCAAGCTGAACACTCATTCTGCCAAGAACACAACGAAATGTT	ENSMUST00000021820	Aspn
ASS1_30805	TCATTGTAGAGTGAAAGTGGAGACTCCCGACCGAGGATGTACACTTGGCC	ENSMUST00000102840	Ass1
ATAD3A_29624	ATCAGAACGTTCCTATACAGGCTTTTGTTCTTCTTGGTATTTCTTGTTGC	ENSMUST00000030903	Atad3a
ATAD5_29688	TACTGAAGCCTCAGAGTTCCAGGCTTCCAGCACCGCCAGCTCTAATTGGC	ENSMUST00000017694	Atad5
ATF1_29064	GAGTACTGCTTGAATTTGTCATGGTTAATGTCTGCAGTGCCTGCACTCCA	ENSMUST00000023769	Atf1
ATF3_29935	GGATGGCGAATCTCAGCTCTTCCTTGACAAAGGGTGTCAGGTTAGCAAAA	ENSMUST00000027941	Atf3
ATF4_29798	CCCTTGCCTTACGGACCTCTTCTATCAGGTCTTTCAGATACTGGATCTCC	ENSMUST00000109605	Atf4
ATF5_29795	GCCTTATACACCTCAATTAGCAGGTCCTTCACGTACTGGATCTCCCGCTC	ENSMUST00000047356	Atf5
ATF5_31928	GGCAATGGAGGCTGCACCAACAATTGGGAGGCAGCGTGGAAGATTGTTCA	ENSMUST00000047356	Atf5
ATF6_30137	GGTTGACATGGAGGTGGAGGCATATAAAGCAATGGCTCTTCACTTAGCAC	ENSMUST00000027974	Atf6
ATF6B_31124	CCTCAGAGACTCAGTTCGGTTGAAATGGCGACAGTCTGAGGAGAGGAAGA	ENSMUST00000015605	Atf6b
ATG3_29318	GCCTTCTCCAAGCTGTCTCTCTTCCCCGGAGCTCCACTGAACACCCCTTC	ENSMUST00000023343	Atg3
ATMIN_30404	ACTCCATCGTATTCCAGGCCAGATCGGCTAGAAGGAAGTCATCCATTGCT	ENSMUST00000109099	Atmin
ATP11B_30243	TTAACAAGTAGATGAGTCCATTGGCGAGAGAGTCAAGATGCTCCTGTCAT	ENSMUST00000029257	Atp11b
ATP1A1_30554	ATTCCTTCTGGTCTTGCAGATGACCAAGTCGGCCCACTGCACTACCACAA	ENSMUST00000036493	Atp1a1
ATP1A2_29833	ATGATCTTGGAGCTCTTGGCTTCCTGGTAGTAGGAGAAGCAGCCGGTGAC	ENSMUST00000085913	Atp1a2
ATP1B1_31637	TCACTGTACCCAATGTTCTCACCATACGCCTTACACTCGACGCGGATTTC	ENSMUST00000027863	Atp1b1
ATP2A1_31721	GAGGCTTCTCACTTCCGTGTTGAATACGTTCATCTTCTCCACCAAGGTGG	ENSMUST00000032974	Atp2a1
ATP2B2_30593	CCCTCACTTGTTCAAAGCCGGCTCTAGCCTCTGCCGGAGCGGCTGGGAGC	ENSMUST00000101044	Atp2b2
ATP2B2_32103	GACTTGAAGAGGTAGCTGATTTGCTCGTGTCGGTCGTCAGGTTGATCCCG	ENSMUST00000101044	Atp2b2
ATP2C1_29591	GACAAGCAACTGTCCCATGATGGATCCAAGAACTGCATAGCAGAACATCT	ENSMUST00000112558	Atp2c1
ATP2C1_31875	TCCTGAGAATCTCCAGTGATCATTTTGATGGAGACTCCTGAGGCAATGAG	ENSMUST00000112558	Atp2c1
ATP5A1_30306	AGCCCGTGCACTCGCGCAATACCATCACCAATGCTTAACACACGCCCAGT	ENSMUST00000026495	Atp5a1
ATP5B_29541	GACCAACAGGAATTTTGATTGGTGCCCCTGAATCCAGTACTTTCTGGCCT	ENSMUST00000026459	Atp5b
ATP5E_29480	CTCCTTCTTCGAGACTTTCACAATTTTTATGCTGCTGCCCGAAGTCTTCT	ENSMUST00000016396	Atp5e
ATP5O_29759	CGGACGCTGCAGGCGCGGCCATCTTTTCCCGGGCGGCTGTAGGTCAAACC	ENSMUST00000023677	Atp5o
ATP5S_31026	GTGTTATAGTCGTGTAGCCACTTCTGGTGGCCACAGTAGCGTACTTTGGC	ENSMUST00000021372	Atp5s
ATP6AP1_31301	CGTTGGTCACAAGGAGATTGCCTTTCTTGCTCACACTGCTGACGTACTCA	ENSMUST00000019231	Atp6ap1
ATP6V0B_30568	CCACTGCCCACGATGCCCACGCAGACTCCACAGAACAGGTTGGACAGACC	ENSMUST00000036380	Atp6v0b
ATP6V0D1_30182	GGAAGAGCTTGGCACGGTCCTCCTTGGACAGCTCTGTGCCGAAAGAGTTG	ENSMUST00000013304	Atp6v0d1
ATP6V1C1_30152	GCTTCTTCTTGTCAGTAGACAGCCTGGTCATTTCTTCTTTATCTGCTTTC	ENSMUST00000022904	Atp6v1c1
ATP6V1D_31477	TCTTCATCCTTCTCTTCAGCCAGCAGGTTGGCAGGCTCCATCACCTCTCC	ENSMUST00000021536	Atp6v1d
ATP6V1F_29079	TCCTGTTGGAAACATGGTAAATCCTTGGAAGTAAGATCTGTCCTCCAGTG	ENSMUST00000149646	Atp6v1f
ATP6V1F_31864	AGGACAGCTGGAATGGACCTCTGGTGGGCATCCAGGGCGTGCCGAACCAT	ENSMUST00000149646	Atp6v1f
ATP6V1G2_30416	GCCATTTCCCACTTCTTCCTCAGCCCCAGAGTTGTTCCATGGCCTCCGCT	ENSMUST00000130992	Atp6v1g2
ATP6V1G2_32108	CGCCTGCTGCTTGCTCTGAAACTCCTGTTCCCGCTCCCTGCGGTATTGCT	ENSMUST00000130992	Atp6v1g2
AURKA_30030	TTAGCCTTTGGCTTGCGTTGTGTTTTAACAGTCTTGAAATGAGGTCCCTG	ENSMUST00000109140	Aurka
AURKB_31437	CCAGCCAAAGTCTGCAATCTTCAGTTCTCCCTGCAGACCTAACAGCAGGT	ENSMUST00000108666	Aurkb
AV320801_32277	GCAGTTAAGCCCTCTGACTTCCATGTCCTCCACTTTGGCAGCCCCTCGGT	ENSMUST00000113183	Av320801
AW112010_29636	TGGCAGAAGACTTTAACGACGTTCTTAGAAGACTTATACGCCAGGTATTG	ENSMUST00000099676	Aw112010
AXIN1_30430	AAGACAGGCAAGACGGCCTCATCCTCCCGTACTTCCTCAAATACCACACC	ENSMUST00000074370	Axin1
B3GAT1_30313	TTTCAACATAGGCAGCTGATGCTATTCTCTGAAAGTTAGATGTGTGGACT	ENSMUST00000160899	B3gat1
B3GAT1_31906	ACACCACGTAGCTTAAAGTAGGCTTGACTTCGCTGCAAGATGAGCCGGAG	ENSMUST00000160899	B3gat1
B3GNT1_31762	AGCTGAGACTTGACTCCCAGCACCCCATAGTCAAGTCCAGTGTTCCAAAC	B3GNT1	B3gnt1
B3GNT2_30374	CTGGAGCGCGCGGTGTCCAAAGATTACAGTCTCCCCCGCTCCGCCAGGAA	ENSMUST00000062844	B3gnt2
B3GNT2_32025	CTTCAATATCAAATGTCCTGAAGCCTTTGTGCTTCTCTGGAACAAGGCCC	ENSMUST00000062844	B3gnt2
B3GNT9_29132	ACGAACACATCTGCATCGCCCTTAAAAACAAAGTGTACATCTGGACAGAA	ENSMUST00000093217	B3gnt9
B4GALT1_29184	CTTGTCTCTTGAATGCCGGATCATTCGACACCTCCCTACTACAGCATTTG	ENSMUST00000030121	B4galt1
B4GALT1_31884	CCTGTAGGCATTACGGTCGTCCATCGGAATGAGGTCCACATCACTGAACA	ENSMUST00000030121	B4galt1
B4GALT2_31334	ACTGTGATGTTGGTGAAGAGCGGTTGCCGAGACACTTCCAAGACTCGGTA	ENSMUST00000030266	B4galt2
B930025B16RIK_29140	TAGAAGCAACTTCAGAGTCTGTGATGAGAACATGCACTTGCCCAATGGCC	B930025B16RIK	B930025b16rik
BAAT_29511	TTGCTGTCCTTATCTGCAGTTTCCTGAAAGGTTCGATAGAATTCTACAAG	ENSMUST00000043056	Baat
BACE2_31213	CTCTGAGCTCTGTCAAAGACCACGTAGAAGCCTTCCATCACGGTCGCACC	ENSMUST00000047275	Bace2
BACH2_30386	GGCCAGTGGACTCCACACCTTTCGTTATACCGAACAGAGACCGCAGGCAG	ENSMUST00000037416	Bach2
BAD_30616	CCCAAGTTTCGATCCCACCAGGACTGGATAATGCGCGTCCAGCCGGCGCT	ENSMUST00000025910	Bad
BAD_31862	GACCTGGCTGGTCCTCAGTGAGGCTAGGGCCCAGGCCCCTATCTGTAGCA	ENSMUST00000025910	Bad
BAG3_31318	GGCTTTCAGTTTGTGGATCTTTGTTTTCAGGACCTTTCTTATCCTTGTCG	ENSMUST00000033136	Bag3
BAI3_31400	GGCAAATTCAGACACTTCTCCCACTCGGCCGGCCTCAGCTCCAGAGTATC	BAI3	Bai3
BAK1_30600	CTTGGCCCAGGAAACCTCGCGACTTTGTGACCATAGAGGAGGTCCCAGCT	ENSMUST00000078691	Bak1
BAMBI_30446	ATTACTGAGCTCTGCTTGCCGCATTTTGTCACAGGTCAGACAGCAGTTCT	ENSMUST00000025075	Bambi
BANF1_29334	TGCTTGGCATTGGCACCACATGTATCCTTCAGCCATTCTCGGAAGAGGTC	ENSMUST00000170010	Banf1
BAX_29957	CAGCCACCCTGGTCTTGGATCCAGACAAGCAGCCGCTCACGGAGGAAGTC	ENSMUST00000033093	Bax
BBC3_31767	ACCTTGCTGCTGCTCCTGCTGCTCTAACTGCAGTGACTGCTGCTGCTTCT	ENSMUST00000002152	Bbc3
BBS10_31676	GTAGGATTTCCAGTGGAATGATTCTCAATTGACAGGTCACAGTTATCAAT	ENSMUST00000040454	Bbs10
BC055324_29987	GCTGCTCAACCACTTCCTGCACTGTGCTCTGCACACTCTGACCAATTCAC	ENSMUST00000097493	Bc055324
BC100530_30959	CTGAAACACCTCCGAGACTCATCTTGATGAGTTGCTTCTTTGCTGGCTTG	ENSMUST00000096089	Bc100530
BCAN_30782	AAAGCCCATTCTCCTGGCAGCGGATCAACGGCAGGTTGCGCTGAGCCAGC	ENSMUST00000090971	Bcan
BCAT1_29039	TCGTGGCGCACCGCGGATCCCGACAGCCCGGGACTGCAGTTTGGCGTGGC	ENSMUST00000032402	Bcat1
BCAT1_31806	AGGCTTAATGTGAGGTTTCTCCCATCCAGACGCAGAGGACCACTCCACCG	ENSMUST00000032402	Bcat1
BCAT2_29962	GATGGCTGCTGTGTCGAGCCTCACTTCTGCCAGGCCGTCCTTAGTTCTGG	ENSMUST00000033098	Bcat2
BCL2_30357	GGCGGCGGCAGATGAATTACAATTTTTCAGTCCAGCATTTGCAGAAGTCC	ENSMUST00000112751	Bcl2
BCL2A1A_29970	CCAGGGAGTGGATATGCATGAGCTCAGACTCAGCCATCTTCCCTGGCAGA	ENSMUST00000098485	Bcl2a1a
BCL2A1B_31220	GAGGAGAAAGAGCATTTCCCAGAACTGTCCTGTCATCTGCAGAAAAGTCA	ENSMUST00000068569	Bcl2a1b
BCL2A1D_31027	GATATACATGAACTCGTACTCAGACATCTTCCCTGGCAGAGCTGACTGCT	ENSMUST00000098486	Bcl2a1d
BCL2L1_29914	GGTGGTCATTCAGATAGGTGGCCATCCAACTTGCAATCCGACTCACCAAT	ENSMUST00000007803	Bcl2l1
BCL2L11_32040	CCACGTATCCTGGCTGCATGTAGATCCTGTCAATGCCTTCTCCATACCAG	ENSMUST00000019281	Bcl2l11
BCL2L11_32224	CAAACAGTCGTTGGCACTGCTGACTTGCGAGGAAACTCATAAAGCTTCCT	ENSMUST00000019281	Bcl2l11
BCL2L13_30779	AGCCACCTTGCTGAATGATGAACTCTGCGGCGTGCTCCTCCAGGTACATC	ENSMUST00000009256	Bcl2l13
BCL2L2_29941	GCACTGTCCTCACTGATGCCCAGTTCCCCTCCCGCAGACGCCGTGCCTCC	ENSMUST00000022806	Bcl2l2
BCL7B_29133	GCTCCCAAGACGCGGGATATCACGCGCCTCACGCGTCGCCGTCCACCCGC	ENSMUST00000031692	Bcl7b
BDH1_30459	AGTAGGTTTCCATCTTGGCAATCTTTTCATCGAAGTACTTCCTGCCATAG	ENSMUST00000089759	Bdh1
BDNF_30168	TTATGAATCGCCAGCCAATTCTCTTTTTGCTATCCATAGTAAGGGCCCGA	ENSMUST00000111044	Bdnf
BECN1_30105	TCCTCCAAGGCCAGCTCCTTCAGCTCCCTCTGCAGCTGCTCACTGTCATC	ENSMUST00000172233	Becn1
BECN1_31817	CCCGGTCCAGGATCTTGAAGCTCGTGTCCAGTTTCAGAGGCTGGCTACAG	ENSMUST00000172233	Becn1
BEX2_31727	CTAGGCACGTAGTAGTCTCCAGCTTCGAAAGGCAGGGCCACAATCGGATC	ENSMUST00000049130	Bex2
BEX4_32184	TGACTTGTTTAAATTTGGATGCCATCACTCCTGGGCCTATCCTTGCCTTC	ENSMUST00000116527	Bex4
BGN_29835	GCCATTATAGTAGGCCCTCTTGACTCCGAAGCCCATAGGACAGAAGTCAT	ENSMUST00000169489	Bgn
BHLHE40_31406	CTCAAGAGGTATGTTCCTATGAGCTAGCCTGAGCTTCCTTGCAATGCGCT	ENSMUST00000032194	Bhlhe40
BHLHE40_32105	AAACCGCTCTGCAGGGCAATGATTTTCTGCTGCTGCTGATCAATTAGATT	ENSMUST00000032194	Bhlhe40
BID_29213	CTCACATAGGAGAATAGGTTCTGGTTAATAAAGTTGACAGTCGTGTGGAA	ENSMUST00000004560	Bid
BIRC2_29390	GATGACCACACGGAATGAACACAATAGAAACCTCTCTGTCCATACACACT	ENSMUST00000190341	Birc2
BIRC3_31711	TTAGGAGGCAATACAGCATTGGTGTCACACACGTCAAATGTTGGAAAAGC	ENSMUST00000013949	Birc3
BIRC3_32031	TCCCAGTTGCTCAGTTTCCCATCGCACGCAAAGCAGGCCACTCTATCTCC	ENSMUST00000013949	Birc3
BIRC5_29705	TCTTGGCTCTCTGTCTGTCCAGTTTCAAGAATTCACTGACGGTTAGTTCT	ENSMUST00000081387	Birc5
BLCAP_31523	CAAGGCACATATTGTGCAAGGTTTCCGTTCCAGGAGGAAGCTGAGCAGGT	ENSMUST00000109528	Blcap
BLM_31056	ACCTTCAAGTGGCCACTCAGCACACTGTGGGCTTTTGTTCCTAGCATCAC	ENSMUST00000081314	Blm
BLMH_31512	GGCGAAGCCACCCACGATTGCAGCCCCCACTGCCAGCATTGCTCACTCTT	ENSMUST00000021197	Blmh
BLOC1S1_29597	ATTCCAATCCACTGGCCTGTCTGCTTGGCAAACTGGGCAGCCTGGACCTG	ENSMUST00000153731	Bloc1s1
BLOC1S2_30208	CTGCCACCTGCTCCTCAATCATGTTGATCTGGTCCAGATATGGCTGTAGT	ENSMUST00000079033	Bloc1s2
BLVRA_31940	TATAGGCGACATCAACCTCTTGGCTGCGGAGAGCATCTTCCAAAGAAATC	ENSMUST00000002064	Blvra
BLVRA_32257	CCAGGCAATGCAGGATGCGCTTCTTCTCAGCAGCCAGGTCCTCTGCAGAG	ENSMUST00000002064	Blvra
BMF_30266	CGTATGAAGCCGATGGAACTGGTCTGCAATACACTGAAGCTTTCTGGCGA	ENSMUST00000090219	Bmf
BMP4_29758	AAAGTTTCCCACCGTGTCACATTGTGATGGACTAGTCTGGTGTCCAGTAG	ENSMUST00000074077	Bmp4
BMP6_30808	ATGTTGTGCTGCGGTGTCACCACCCACAGATTGCTAGTTGCTGTGATGTC	ENSMUST00000171970	Bmp6
BNIP3_31290	TTGTCAGACGCCTTCCAATGTAGATCCCCAAGCCAATGGCCAGCAGATGA	ENSMUST00000106112	Bnip3
BNIP3L_30054	CTCTGTCCCGACTCATGCTGTGCATCCAGGAGGATCTTCTCCATGTCTCC	ENSMUST00000111115	Bnip3l
BORA_30755	GAGGCTCACCACAAGCATTTGTGCTGAGTGGAGCCGCGCCTGTGCAGGAA	ENSMUST00000022656	Bora
BPGM_30927	CCTTGTTTCACTTTCCCTTGATCATCCACTTTCTTAATGGCTGCCTGGAT	ENSMUST00000045372	Bpgm
BPHL_31284	TGTAGAAAGTCTTCTACCAACCTGTTGAATTCGTCTGCAAAGCGTAAGTG	ENSMUST00000040656	Bphl
BPNT1_31681	ACATGGCTTGCATAGTACTCGTAGTTCCTCAGTGCAGCCAGGACACCGGC	ENSMUST00000027916	Bpnt1
BRCA1_31143	ACTACTGTCACAGGTGATATTCTGTACCAGGTAGGCATCCAGATCCCGAC	ENSMUST00000017290	Brca1
BRCA2_31708	GGCCTTCCGGAATTCTGACTGGATCCGCGCTTGTTTCTTATCATTCAGCA	ENSMUST00000044620	Brca2
BRIP1_30485	TTTCCTCCCGAGGCTGACTAGTTCTTCTATGTCCCAGGCTCTGGACATGC	ENSMUST00000044423	Brip1
BRMS1L_30351	CTGAGGTAATGTCGATGCTGTGCCTGTCCTCCTCAAGCCTTCTTATCTTC	ENSMUST00000059250	Brms1l
BSG_29611	ACTCGTAAGTGCCTGTGTCCTCTGCGGTGAGCCCATCAACAGAGAGCGAA	ENSMUST00000067036	Bsg
BSG_32071	CATTTACGTCAAGGTTGCTGATGGTCAGCTGTGACTTCTCAGGCGTGGAT	ENSMUST00000067036	Bsg
BST2_29565	AACCCGTCTCTACAGGCCACGCTGTTCGCTGTGACGGCGAAGTAGATTGT	ENSMUST00000051672	Bst2
BTG2_29359	CATGTCGGTTCTCTTCCCGTGGCTCATACCGGTGGCTGAGGAAGTAGCTG	ENSMUST00000020692	Btg2
BTK_30376	CATGATGGTATATACCCTCTCTGATGCCAGATGAGGCCTGTAGAGACGTA	ENSMUST00000033617	Btk
BUB1_29853	TGGCATTTCTCACATCTCCATGAATAGCTTCAAAGACTTGAGCAAAGGCT	ENSMUST00000028858	Bub1
BUB1B_29857	TTCGTAGGATCAGACTCCGTGGACTCAAGTCTCCGTGTACTATTTCAGCT	ENSMUST00000038341	Bub1b
BZW2_32278	GTGTTCCTCCAGGGGCAAGCATACTGCCAGCCACCAGGATATCAAAGAGT	ENSMUST00000020856	Bzw2
C030009O12RIK_31749	GATGGCGCATTGGAAAGGCTGGTGTCAGATGCCATCAGCTCTGTTTGGAA	C030009O12RIK	C030009o12rik
C1QA_30183	CAGATGAAGCGACCCGTGTGGTTCTGGTATGGACTCTCCTGGTTGGTGAG	ENSMUST00000046285	C1qa
C1QB_30402	AGGTGAAGTAGTAGAGGCCAGGCACCTTGCAGGTGAACTTGCCGTTGCGT	ENSMUST00000046384	C1qb
C1QC_31430	TTGAGGTTCAGGTGCACGCACAGGTTGGCCGTATGCGATGTGTAGTAGAC	ENSMUST00000046332	C1qc
C1RA_31043	CCTGAGATCGAAAGCTAACTTATCTTCTGTTATCCCGAATCCGCTGACAT	ENSMUST00000068593	C1ra
C1S1_30273	CCTCTGAGGTTGATAACAAAGACTTTCTTTTCTGTACTGCCCCACCCTGA	ENSMUST00000160505	C1s1
C230037E05RIK_29946	GTAATGCATCCACACCCAGGAACCTGCTACGCCACTGTGGTGATAACATC	C230037E05RIK	C230037e05rik
C230085N15RIK_29964	CACCTCAATTCGCACAACATGGAGTTCAGACACACGAAGCCAACATCAAA	ENSMUST00000194893	C230085n15rik
C2CD2_31518	CCCTCCCAGTGTCAAACCGAGGTTTGGTCTTCACAGCAGTGACAGTGGTG	ENSMUST00000170757	C2cd2
C2CD2L_31274	AAGCTGCCAGCCTTCTTCCGGACGCTAGGTGTGGCCGTCGTGTTGGACAG	ENSMUST00000065080	C2cd2l
C2CD5_30999	TTCATGATGTAGGACACAACAGCATTCCCGCCCAGCGCTGCCACGTGAGC	ENSMUST00000203673	C2cd5
C3_30423	TCAGCACACCGGCACATTTCACTGTGGCACAGCTTGCTGAGCATCCCATC	ENSMUST00000024988	C3
C3AR1_29828	TGGTAGAGTGCGTGAGCTCTTCGCTGAAGGCTGCTTCCAGAATGCCCTTT	ENSMUST00000042081	C3ar1
C730049O14RIK_31254	TCTTTACCACTGATCCACAATCAACCCGTTTTCTACCAACAGTATAGGAG	C730049O14RIK	C730049o14rik
C8A_29829	GCATTCCTTCATCCAGCACAATATTGTTCCTTCTCATCTTAAACTGTGCA	ENSMUST00000048947	C8a
C8B_32265	AAACGCCCACTTTGACATAGACTTTATAGACCATACCACCAATACCGAAA	ENSMUST00000031663	C8b
C9_29286	TTGATGGATTTCGCAGGCCATTCCCCTAAACATCATTGGGCAGGAGCACA	ENSMUST00000022749	C9
C920025E04RIK_30312	AAGCCACCACAGCTCCAAGGATGATCACAGCTCCAAGGACAACCAGAACA	C920025E04RIK	C920025e04rik
CAB39_29790	TGCTTGACTAAGTAGGTCTTCTCGTCGTTGAACTGCTCGTCCTCGGTCCT	ENSMUST00000113360	Cab39
CACNA1S_30109	GCATCCTGATGGAATAGGAAGCCGTAGGCTATGATCTTCATGGCGGCTTC	ENSMUST00000160641	Cacna1s
CACNA2D3_31233	ACCTGATTTCAATGGGTGCCATGGTTATAGGAGCCACGGACTCACAGAGA	ENSMUST00000022567	Cacna2d3
CACYBP_29581	ATGGTTCGCTTCATATCATCGTCTCCGTCTTCATAAATTTTCTTTAGAAC	ENSMUST00000014370	Cacybp
CADPS_31250	CCTTCATGCTGATACCTTGTAAGCCCCCACCCTCACTCACTGACGCTGTA	ENSMUST00000112657	Cadps
CALCOCO1_30287	TTGTCACTCATGGTCTGGATGTCATCCTCTAACTCCAGGATACGGGCCAC	ENSMUST00000023818	Calcoco1
CALN1_30659	GGTTGGCTGCGATCAGCATGACGCTTATGATGAAGGCCATGGCAAAGGCG	ENSMUST00000086029	Caln1
CALR_31260	TCTTCCTCCTTCTCATCTTCTTCGTCCTCATCTTCATCTCTGTCATCATC	ENSMUST00000003912	Calr
CALU_30468	CTCCACGCCGCAGGATACCGTGGCTGCGGCTCACCCAGGGAGTGAGCTCC	ENSMUST00000031779	Calu
CAMK1_29044	TTCCACTTGCTCTTGGCAAAGTTCTTCTTGATCTGCTCGCTCACTGACTG	ENSMUST00000032409	Camk1
CAMK2B_31466	CCGACAGCTTCTTGGTATTAATGATCTTGGCTGCATACTCATGGCCGGTA	ENSMUST00000019133	Camk2b
CAMK2G_31021	ACCCATGGGTGCTTGAGAGCCTGGTCGGCCGTGATGCGCTTTGCAGGGTT	ENSMUST00000071816	Camk2g
CAMP_29890	CCCTGTTCCTTGAAGGCACATTGCTCAGGTAGCTGCCGCTCTGCCTTGCC	ENSMUST00000112022	Camp
CAMSAP2_29905	GGAGATCTCTTTCAGTTACCAGTTTCTCCTGGTCAGTGACATACAGGCCT	ENSMUST00000048309	Camsap2
CAMSAP3_30432	TGAACCGTTTGCGATCCGAGTTGTACTTATAGATGCCTTCGACCATGGCA	ENSMUST00000207432	Camsap3
CANT1_30142	CCAGCGTGAAGGCCATGACATAGGTGGCGATTCTGCCATTGTCCTCTTCC	ENSMUST00000106289	Cant1
CANX_31730	TCATCATCATGTCCATCATGAGCCTCAACAGCTGCAGTTCCAAGGACCAG	ENSMUST00000179865	Canx
CAP2_30740	CTTCGCGCTCACGATCTCACAGTCTAGTGCATCTTCACTGAGGTACAGGT	ENSMUST00000021802	Cap2
CAPG_29439	AAAGCAGTCATCTGGAATTAGCAGTTCAGAGGCAAAAGGGCTGGAGTCAG	ENSMUST00000114072	Capg
CAPN1_29639	GGCAGGCGGATACGGTTGCTGACTTCCCGAAGGTTGATGAAGTGCTCTGA	ENSMUST00000025891	Capn1
CAR1_29673	CTTGCAGATCACCCAGGTCACACTTTCATGAAGAGGAGGGTGAGTCAGAG	ENSMUST00000181860	Car1
CAR3_29855	AATGCCAACCACAGCGATGCCATCAGGCTGCTTCAGAGCCTCTCCAAAGG	ENSMUST00000029076	Car3
CAR4_29338	GCAAAGTGTCTCCCATCAATACTGTGCTCTGAACCGTTGTCATTCCCATT	ENSMUST00000103194	Car4
CAR9_30338	GTCAGAGACCCTTCATATCGGTAGTAGCGGCTGAGGTCCGAGGGCAACAG	ENSMUST00000030183	Car9
CASC3_30822	GGCAGCCTTTGCCCAGAAGGTAACTTGCTTCCTTAGGATTTAAGTCTAGG	ENSMUST00000017384	Casc3
CASC5_30400	TAGTTGAGTTAAGTCAGCTGCATCTGCTAGAATCTGTTCCAGGTCATCAA	ENSMUST00000028799	Casc5
CASK_29837	CCAGATGTCTGATTGTCTCATCAATTTCGTTGTTGATAATTGTGAGATCG	ENSMUST00000115435	Cask
CASP1_31578	CAGATCCTCCAGCAGCAACTTCATTTCTCTGAGGTCAACTTGAGCTCCAA	ENSMUST00000027015	Casp1
CASP2_31416	CCATCTACACCATAGATGCCACCTTCCACACCATGTGAGAGGAGTGCCAC	ENSMUST00000031895	Casp2
CASP3_29313	CGAATTCCGTTGCCACCTTCCTGTTAACGCGAGTGAGAATGTGCATAAAT	ENSMUST00000093517	Casp3
CASP7_29680	AAGTGCCTGGCCACCCTGTCGTTCACCCTGGTCAGGATCTGCATGATCTC	ENSMUST00000026062	Casp7
CASP8_30720	ACTTCTAAAGTGTGGTTCTGTTGCTCGAAGCCTGCCTCATCAGGCACTCC	ENSMUST00000027189	Casp8
CASP8AP2_30288	TCAGCTTGACAGCTAAATAAGTAAATGTTTTCAGGGACGGCATTCTTTTC	ENSMUST00000108178	Casp8ap2
CASQ1_29275	AAACTCCACCAGAGTGTCTGCAGAAAACTCGCCGTCATATTCAATGACTT	ENSMUST00000003554	Casq1
CAST_30493	CTTGGCTAACGTGGCTCGGAGGATCTGGCTGCCGGGTGCCCAGTGAATCT	ENSMUST00000065629	Cast
CAT_29095	TTCTTCTGAATGAAAAGCTGAGCGTCCTTCAGGTGGCCGGCAATGTTCTC	ENSMUST00000111168	Cat
CAV1_31411	GATCGCAGAAGGTATGGACGTAGATGGAGTAGACGCGGCTGATGCACTGA	ENSMUST00000115456	Cav1
CAV1_32106	TCGCGGTTGACCAGGTCAATCTCCTTGGTGTGCGCGTCATACACTTGCTT	ENSMUST00000115456	Cav1
CBLB_29228	ACTGCTCTTCGTACATCCTTTCCTTGCCTTCTTTAAAGAGCCGGATCGCT	ENSMUST00000114471	Cblb
CBLN1_29271	TCGAAGTAGATGATCATGGTGCGATTACTCATCTCGGACGGCTCATGGTT	ENSMUST00000169693	Cbln1
CBR1_30996	GAACTTGGCGCAAACTCTGCCTCTCGAGGCTGCTGGAGAGTGGTTCAAGA	ENSMUST00000039659	Cbr1
CBR3_30786	CAGGATCCTCGTAAGGACTGTCACCCCCAGCTTCGACACCCCGTAAGCCG	ENSMUST00000039620	Cbr3
CCDC80_31510	GTCTCCGAAGTTGCATGGAATCAATTAAGTCATACACGATGACCATCGAC	ENSMUST00000099498	Ccdc80
CCDC85B_30360	AAGCAAAGCTCCTTAAGGGCCAGATTTTCCCGCAGCAGCTCCTCCTGGCG	ENSMUST00000179549	Ccdc85b
CCDC86_31577	CCTCTGTTTCTCCTCCTCCAGGTGTCGGGCGAAGTCCTTAGCCAGCTTTC	ENSMUST00000025639	Ccdc86
CCDC92_29955	CACCTTGCTTGCATTCACCTGGTCCACGGCCCTCATCTCTCCCTCAGGCT	ENSMUST00000036206	Ccdc92
CCL11_30501	AGTTACTGCTTGGATCTCAGCCTCTGGGCTCTGTAGGCTCTCCCGACTAG	ENSMUST00000000342	Ccl11
CCL12_30706	GCAGGAGGCATAGAAGTGTGGAAATCTTCATGTTGAGGTCAAAGACTTCG	ENSMUST00000000194	Ccl12
CCL17_30059	TATACCAGCTCACCAACTTCCTGATAGGAATGGCCCCTTTGAAGTAATCC	ENSMUST00000034232	Ccl17
CCL2_30705	CTAGTTCACTGTCACACTGGTCACTCCTACAGAAGTGCTTGAGGTGGTTG	ENSMUST00000000193	Ccl2
CCL22_30132	CAGAGGGCAGGAAGGTCTGATATTTAAACGCTCTCTCCACCCACTAGTTC	ENSMUST00000034231	Ccl22
CCL24_31046	GAAGATGCAACACGCGCAGGCTACCAGGAGAAGGAGGCCGGCAACGATCG	ENSMUST00000201401	Ccl24
CCL27A_30891	GGCCTCCTGCAGTTCCATGTGGACAATCCTCCTCAGCAGCCTGCTTGGGA	ENSMUST00000108037	Ccl27a
CCL27B_31737	GGACAATCCTCCTCAGCAGCCTGCTTGGGAGTGGCTGTCTATAGAGCTGA	ENSMUST00000177785	Ccl27b
CCL3_30767	ATTCAGTTCCAGGTCAGTGATGTATTCTTGGACCCAGGTCTCTTTGGAGT	ENSMUST00000001008	Ccl3
CCL4_29698	GACTGCTGGTCTCATAGTAATCCATCACAAAGCTTCTGTGAAGCTGCCGG	ENSMUST00000019074	Ccl4
CCL6_30177	ACAGGCCCAGCTGGTCTGAGAATTTTTGCTCACTCCTCCCTGATTCTCTG	ENSMUST00000019071	Ccl6
CCL7_30624	GGCACAGAAGCGTGGCAGAGATCCTCATGGTGGAGAAAGAGAGTGAGAGA	ENSMUST00000021011	Ccl7
CCL9_29568	TTCTTAGTGGGCAGACCCAGCTGGCCTTCAGACTGCTTGCTGTTCCTGGC	ENSMUST00000019266	Ccl9
CCNA1_31057	ATACTGAGGCATGCTTTATGCAGCTCACTCAGGCAAGGCACAATCTCATT	ENSMUST00000029368	Ccna1
CCNA2_29848	CTTGTAGTTCAAGTAGCCCGCGACTATTGAAATAAACCAATGAGGGCGTC	ENSMUST00000029270	Ccna2
CCNA2_31974	TCTTCTCCCACCTCAACCAGCCAGTCCACAAGGATGGCCCTCATGCTGTT	ENSMUST00000029270	Ccna2
CCNB1_31338	CTCTGGCTATCCACAGCTAAACACTAACAGCCGTTCCTCCGCAGCACGCC	ENSMUST00000072119	Ccnb1
CCNB1_31979	CACGGCCTTAGACAAATTCTGAACTAGTGTACAGTTCAGCTGTGCCAGCG	ENSMUST00000072119	Ccnb1
CCNB2_29477	GCTGCCACCTGAGAAGGATGGTAGTGCACCATGTCATAGTCGACGAGCGT	ENSMUST00000034742	Ccnb2
CCNC_29197	GACTGACTGATTCTGAAACAGTACTTGTCATAAATGAGGACAGCAACAGC	ENSMUST00000065928	Ccnc
CCNC_32038	GTAACTGTGACAATAGGAGATTGCCTTATCTTGTCCAGCATCATCTTGCA	ENSMUST00000065928	Ccnc
CCND1_31337	AGATGTCCACATCTCGCACGTCGGTGGGCGTGCAGGCCAGACCAGCCTCT	ENSMUST00000093962	Ccnd1
CCND2_30507	CTTGGATCCGGCGTTATGCTGCTCTTGACGGAACTGCTGCAGGCTGTTCA	ENSMUST00000000188	Ccnd2
CCND2_31968	GTTGGATGTCCTTCTGCACGCACTTGAAATAGGAACACTGCGGGAGGTAG	ENSMUST00000000188	Ccnd2
CCND3_30973	GCAGGCAGTCCACTTCAGTGCCTGTGATCCCGGCCAGCAACTCTGTGAGC	ENSMUST00000171031	Ccnd3
CCNE2_29384	CTTTCTTAACCACTTCAATGGAGGTAAAATGACATAAGGCGGCAGCAGCC	ENSMUST00000170901	Ccne2
CCNF_30487	AAACATGACTTCTTGGCCTGATGGTGGCAAGGCTTTGTGCTTGAGTGGCT	ENSMUST00000115390	Ccnf
CCNG1_30735	GCTGCAGAAATTGAAAGGCAGTAGTAGCTTTGACTTTCCAACACACTTTC	ENSMUST00000020576	Ccng1
CCNH_29679	GTATGGATTGTGGACAATAAGGTGAAAATTAAGTTGTTGTATAAGTAGTA	ENSMUST00000022030	Ccnh
CCP110_31283	CACCTACTGCCCGGTCAGCTTCTCTGCCCGTGGACCAGCCTCCTCTGTAA	ENSMUST00000106557	Ccp110
CCP110_31867	CTGCCTGTGGACAGCGATGCTTCCTGAGCTCGGCCAAGTGCTTTCTCGCA	ENSMUST00000106557	Ccp110
CCR2_29976	GGTTATCAAAGGAGGCAGCAAGTCTACAGTTGTATCGAGGAGCCCACTAA	ENSMUST00000171719	Ccr2
CCR2_31936	ACCTGCATGGCCTGGTCTAAGTGCTTGTCAATCACACAGTTACTCATTCC	ENSMUST00000171719	Ccr2
CCR5_30053	TTGCAAAAGCGTTTGACCATGTGTTTTCGGAAGAACACTGAGAGATAACT	ENSMUST00000111442	Ccr5
CCR6_32234	GGAGCGTACCCGGAAAGATTTGGTTGCCTGGACGATGGCAATGTACCGGT	ENSMUST00000097418	Ccr6
CCR7_30148	CAATGATCACCTTGATGGCCTTGTTCCGCTCAAAGTTGCGTGCCTGGAGC	ENSMUST00000103134	Ccr7
CCT5_30697	TCTTCAGATTCTCCAGGCTTACGGATGTCATCAATCTTCAGAATCATCCT	ENSMUST00000022842	Cct5
CCT6A_29113	CTCACCTGTGCTCAGATCCACACCTACGAGCTGGCCGGATTCCGAATGTT	ENSMUST00000201414	Cct6a
CD27_30589	CACACTCTGTACATTCCTGGTCCCTGCACTGCCAGTTCTTGGAACAGCTG	ENSMUST00000032486	Cd27
CD27_31907	GGAAGAACAAGATTGCACCCAGGACGAAGATAAGAAACATGCTGGAGAAG	ENSMUST00000032486	Cd27
CD2BP2_30625	ATATCATATTTGCTGGACCCTTCCTCATCATCATCCTCTTCATCACTGTC	ENSMUST00000166791	Cd2bp2
CD300LB_29490	TTGACCTCTTCAGCCAGAGGACAGCACCAACCAAGATGAGCAAGGCAGGC	ENSMUST00000149663	Cd300lb
CD320_29649	TCCTGAAAGAGGTCTCATTCTCCATGGTCGTAGAAATCCTTGTAGTTGTG	ENSMUST00000002379	Cd320
CD36_30859	CCTATGCTCATCTTCATTTGGATGTAAGCCTTCAATAGGTTCTGAAACAT	ENSMUST00000169095	Cd36
CD3D_31087	CTTCCACCGTTCCATCTAGATGCATGACGCTGGTATTGCAGGTCACAAAT	ENSMUST00000034602	Cd3d
CD3G_30595	GGCGAACTCCATCCTGTCCCGCAATGAGATATACACCAAGAGCAAGGAAG	ENSMUST00000002101	Cd3g
CD4_31001	ATCACCACCAGGTTCACTTCCTGATGCAGTGTCCCTTTGTCCAGAGTCAG	ENSMUST00000024044	Cd4
CD40_30424	TCCTTGCTGGTGCAGTGTTGTCCTTCCTTACAGGTACAGACAGTGTCTGA	ENSMUST00000017799	Cd40
CD44_29635	CATTTCCTGAGACTTGCTGGCCTCCCCGTTGAGCTCACTGGGTTTCCTGT	ENSMUST00000099673	Cd44
CD48_30854	ATGCTGGTCCTTTACCTCACACGATAGCCTCAGGTGACAGGAATCAGTCG	ENSMUST00000068584	Cd48
CD48_31970	CTTCAACTCGTTCTCAGTTTCACGCAGCACTCTCATGTAGTAGGTACCTT	ENSMUST00000068584	Cd48
CD5_29468	TAATGGCCTTCTGCTGCCTCAGCCTCAGTGAGCTCAGCTGGCCAGCCAGG	ENSMUST00000025571	Cd5
CD52_30892	GGTAGAAGAGGCACATTAAGGTATTGGCAAAGAAGAGGAAACTGCAGGCA	ENSMUST00000000696	Cd52
CD55_29177	ACATCAGACTTGCTCACAGTACAATAAATGCTAGCATTTCCAACCAGGAT	ENSMUST00000027650	Cd55
CD68_30420	TTGTGGCATTCCCATGACTGGTGGTGGTGGCAGGGTTATGAGTGACAGTT	ENSMUST00000018918	Cd68
CD74_31435	TTGTCTAGGCGGCCCTGTTGCTGGTACAGGAAGTAAGCAGTGGTGGCCTG	ENSMUST00000097563	Cd74
CD79A_30058	AAGGTTCAGGCCCTCATAGAGATTTTCATCTTCATAGTCATCTGGCATGT	ENSMUST00000003469	Cd79a
CD79B_31651	TCCGTGCCACAGCTGTCGGTGACATTATGGTTGGCGCTGTCACATTTCTG	ENSMUST00000044228	Cd79b
CD80_29980	TCTGACACGTGAGCATCTCCATATTTAATGAGACACTTAATGGTGTGGTT	ENSMUST00000099816	Cd80
CD83_30139	TGATGAGTGTCAGGTAGAAAACAACCAGAGAGAAGAGCAACACAGCTTCT	ENSMUST00000015540	Cd83
CD86_30480	CTTGGATCTAGAGATGGTTCCATATTTGTGTTTCTTGATTTGCCAGCACT	ENSMUST00000089620	Cd86
CD8B1_32264	CCGTCGCGCAGAAGTAGAAGTCACTGTCCTCTGGCTTCACATTCATGATA	ENSMUST00000065248	Cd8b1
CD97_31321	TGCCAGTGCCTGTTGTGGAAGAGTTGAACTCTGTGTACTTGCTCCCAGTG	CD97	Cd97
CDA_30848	TAGAGATGGCAATAGCCCTGAAATCCTTGTACCCTTCGGAGATGGCCTTC	ENSMUST00000030535	Cda
CDC20_30847	AGGCTACTTTTAGCTACACTGGCTTTTTCCCGCTCACGCCGAAGGGCAGG	ENSMUST00000006565	Cdc20
CDC25A_30562	GCGCCTGCAACCTCAAGATTAAATCCAAACAAACTCCGTGGAGGAAGAGT	ENSMUST00000094324	Cdc25a
CDC25A_32088	TCTGCCTGTGTGTAAAGGGATCTTTACTCTCCTCGTAGATGTGACGAGAT	ENSMUST00000094324	Cdc25a
CDC25B_29257	CAAAGTTCCCTCCTGCTCCGTTCCCCAGCCCAGCTGCGAGTCTTAAGGCG	ENSMUST00000028804	Cdc25b
CDC25C_30344	ACAGAGGAACACAATGATGACTCTTTTCTGGATATCCAGAGGAACAACAG	ENSMUST00000060710	Cdc25c
CDC45_31104	AGACTCCCGCCAAATCACAGCTCTTCTGATTGGTCCACGCCAGCAGCCAA	ENSMUST00000000028	Cdc45
CDC45_31812	TGTGGACCGTCTCGTAGAACTCCTTGCGGAAATCGGTCACGAACATAGCC	ENSMUST00000000028	Cdc45
CDC6_30994	GGAGTCCTGAAAGGGACAAACACTCAGACTGGTCTACGGCCGTCACCTGC	ENSMUST00000092706	Cdc6
CDCA2_30028	CTTGTGCTGCGTCTCACCTTGGTTTTACTGCTTGTTCTCTGAAAGCTTTG	ENSMUST00000150006	Cdca2
CDCA4_30933	ACTTGGTCCCACTCATCATTCCTGTTAGCACTGTGTCCAGGTCATAGTAG	ENSMUST00000062092	Cdca4
CDCA5_30855	GCCTTGCTAGCGAGAAAGCGGAAGTGACACAGGCCGGAGGCGGACCATCC	ENSMUST00000025704	Cdca5
CDCA8_29219	ACACAGTCTGAGGAACCCTCACAGCTCCAACTAAGGGACGGGCGGCTCCT	ENSMUST00000084296	Cdca8
CDH1_30717	AGATAATCGTAGTCCTGGTCCTGATCCGACTCAGAGGAGTTCAGTGAGCT	ENSMUST00000167688	Cdh1
CDH2_29277	ATAGCGATGATGGCGCCCGTGCCAAGCCCTGCACCCACGATCCTGTCCAC	ENSMUST00000025166	Cdh2
CDH3_31155	AGTTTCTTGAATCGACTTCCCCACTCGTTAAGGTAGTTGTAGTCCTGATC	ENSMUST00000080797	Cdh3
CDH7_29548	ACCACTGGCACCTTGTCTGAGAGGCTACAGAGACTTCAGGACCTCCTGGA	ENSMUST00000137092	Cdh7
CDH7_32067	CTGACTGGAAGTATGGCTTGGATCTGGACCGTGGCAGCTCAGCTTGACTC	ENSMUST00000137092	Cdh7
CDK1_31242	CCAAGCCGTTCTCGTCCAGGTTCTTGACGTGGGATGCGAGGCTCCCCGGC	ENSMUST00000119827	Cdk1
CDK19_29897	TGGAGCACCCAGTTTGCGTGGAGGTAATGGATGCCATCGAGGATCTGGTA	ENSMUST00000044672	Cdk19
CDK2_31446	TTCAGCAAAGATGCAGCCCAGGCTCCAGATATCCACGGCTGTGGAGTAGT	ENSMUST00000026416	Cdk2
CDK4_30985	CAGCCAGCTTGACGGTCCCATTACTTGTCACTAGAATGTTCTCTGGCTTC	ENSMUST00000006911	Cdk4
CDK4_31888	CAGGTATGTCCTCAGGTCCTGGTCTATATGCTCAAACACTAGGGTGACCT	ENSMUST00000006911	Cdk4
CDK5R1_29836	AGCAGGACAGCCTGGAGCTCATGGTCGGAGCCCACCTCAGAGGAGATGAC	ENSMUST00000053413	Cdk5r1
CDK6_29089	TCCAAGTAAGTGGTCAAGTCTTGATCAACATGCTCAAACACTAGTGTAAG	ENSMUST00000165117	Cdk6
CDK7_30620	GCTTTGTTGCCACGGTTGGATTCGCCGGTTCCTTTAATGCCTCCACCGGA	ENSMUST00000091299	Cdk7
CDKN1A_30669	CAATCACGGCGCAACTGCTCACTGTCCACGGGACCGAAGAGACAACGGCA	ENSMUST00000119901	Cdkn1a
CDKN1B_31384	TTGTCTGACGAGTCAGGCATTTGGTCCACCAAATGCCGGTCCTCAGAGTT	ENSMUST00000204807	Cdkn1b
CDKN2A_29751	GTTCCCAGCGGTACACAAAGACCACCCAGCGGAACACAAAGAGCACCCAG	ENSMUST00000060501	Cdkn2a
CDKN2B_29062	TCAATCTCCAGTGGCAGCGTGCAGATACCTCGCAATGTCACGGTGGCCCT	ENSMUST00000097981	Cdkn2b
CDKN3_30041	ATGATTTCCCAGCAGCTGCCAATGTCGGGAGTCCCTCCATCTGGGATCGG	ENSMUST00000067426	Cdkn3
CDT1_31064	AGTTTGGCAACTGTCCACCATCCTTGCACAGACCACCTCCATAGTGAGTG	ENSMUST00000006760	Cdt1
CEACAM1_29450	CTGTAATGTTCTTGACTGTGGTCCTACTGAGGCCAGTGACAGAGTTATTG	ENSMUST00000098669	Ceacam1
CEACAM1_31909	GAGAGTGTCATTCTCTCTGTGAGCTGAAGACTCTGGCTATTGAAGAGCCA	ENSMUST00000098669	Ceacam1
CEACAM2_30326	CTTGTGCCAGCTAAAGGCCGAGACTCCCTTCATCATATTGTAAACAACTA	ENSMUST00000044547	Ceacam2
CEBPA_30781	CGTCTCCACGTTGCGTTGTTTGGCTTTATCTCGGCTCTTGCGCACCGCGA	ENSMUST00000205391	Cebpa
CEBPB_30534	AACAAGTTCCGCAGGGTGCTGAGCTCTCGCGACAGCTGCTCCACCTTCTT	ENSMUST00000070642	Cebpb
CEBPD_30192	CACAGCAGTCCACAAGCCTGCACTTTGGGCAGGGATTTGAATTACAAACA	CEBPD	Cebpd
CEBPZ_30237	CAATAGTATCAAACTTGGAGCCCATATTCTCATCCAGCAGATGGCCAAAC	ENSMUST00000024885	Cebpz
CEL_30023	CACAGCCCAGAACTTCAGGAACTTTTCTCTCAGGTGCTCCTTCATGGAAG	ENSMUST00000028161	Cel
CELA2A_29392	AGCCTGTGACATAGCAGACATAGTTTCTCGGGAGAATGGTGCCAGCGGGT	ENSMUST00000102481	Cela2a
CELA3A_29448	CACACCATGGTCCTCTTCACATAGTGGCCCCACCAGTCCCACCTGGAGCA	ENSMUST00000024200	Cela3a
CELA3B_30323	CACACCATGGTCGTCTTCACAGACAAGCCCCACCAGTTCCACCTGGAGCA	ENSMUST00000102522	Cela3b
CELF6_29888	CCTTCTCAGTGGCAGTATTTACAGCAGCAAGCCTTCCACGTCTGTTGTCA	ENSMUST00000118549	Celf6
CELF6_31863	CCTGTTGGCATCCTTAGGTCTCTTTAGCTGGACCTTGAGCCTCTTCATGC	ENSMUST00000118549	Celf6
CELSR3_31544	CTGAGGAGTTGAAAGAGGCAAGGATAGAAGAGAGAATGTCCAGTTGCTCT	ENSMUST00000024238	Celsr3
CEND1_32279	TTGTGTGACTGGCAGGTGGCTAGACCACAGTGGCTCAGGACAGCTCACCT	ENSMUST00000164387	Cend1
CENPE_30836	TTCTATCCTGAAGCACTTTTCTCGAAGTCTTCCTGTACAGTATTCTCCAG	ENSMUST00000062893	Cenpe
CENPF_31668	GATCCTGTCTGGACTGCCGTGACTTCAGCCGAGCAACTTCTATTTCTAAT	ENSMUST00000171929	Cenpf
CENPH_31080	CCCGCAGGTTTGAACGCCACAGAAAATAACCCAGCAGTTCTTCCCGCCAC	ENSMUST00000075550	Cenph
CENPI_30714	ACTCTTGAAGTTGCCTGATTTGTCTTTCACCATCCAGTCTAAGAGACTGG	ENSMUST00000081064	Cenpi
CENPK_29938	ACCACCTGATTTTCCACATCACTGTTTAATACGTTAAGAGTGTCCAGTAT	ENSMUST00000070761	Cenpk
CENPL_30394	CTGAAAGCAACTGAAGTCGTCATTTTAACTGAGGGCAAGGCTTGGAAGGC	ENSMUST00000111618	Cenpl
CENPQ_31470	ACACTTGTGTAGAGAAGGCCGGCCTGCGGAGCGTATGTCTTTACGTCATC	ENSMUST00000087114	Cenpq
CEP55_30406	CTCTCCGTCTTCTGCTTGTCCTCCTCCAGGTGCTGGATGTCTGCCTTTCG	ENSMUST00000096096	Cep55
CEP57_29107	CCGAAAGTTCTTCATTAACACTGCTGGAAGGAGGCACCACTGACTTCTTA	ENSMUST00000124883	Cep57
CEPT1_31238	AGTGAGCTGTAGAGGCTTTAATTCTGAAGACATGTATATGCAGGTGAGAT	ENSMUST00000068301	Cept1
CERK_31501	TTCCTTCGAGTCATTGTCCTCGTCTTCCACGTGCTTCGACGTGAAGTGGA	ENSMUST00000156546	Cerk
CES1D_31073	GCTTTACATCTGTTGTAATCAGAGCAGCAGTGAGGGACACACCACTCTCA	ENSMUST00000034172	Ces1d
CES1G_30475	CCTATGGGCTGCCTGTGCTGGGACTCCAATCTGAAGGTATCCTTCCTTCT	ENSMUST00000044602	Ces1g
CES2A_31253	AGCCAGGATCTCTTGTTTACTCTTTGCTCTCAGGCAGTGGATCAGGGCTT	ENSMUST00000034346	Ces2a
CES2A_31826	GACACACTTGTACCTCCTGCTGAGACTCCAAATATAGTGACCCTGTCACG	ENSMUST00000034346	Ces2a
CES2B_29770	TGAGAAGCCCTTAGCTCCTGGATCTTCTGGGACAGAGTCTTGGTCCAGAA	ENSMUST00000059449	Ces2b
CES2C_30444	ATAGTAACAACCACCAAGTCCTCATTGACTGTCAATAGAGATCCATCAAA	ENSMUST00000055052	Ces2c
CES2D-PS_29681	TGGTCCTACAGGAGGCTTGGCAAAAGGAATTCCCAGGAAGGTGTGGACAC	ENSMUST00000043209	Ces2d-ps
CES2E_30769	TTATGAAAGGCAAGAAGTCACTTCCATACATGGAGAAGCCATCAGGGTGC	ENSMUST00000109410	Ces2e
CES2F_29417	CCAGGAAGTTATGGGCTCCAGCTTTGATGTCTGTCAAGTGGACAAACTTG	ENSMUST00000076384	Ces2f
CES2G_31409	CCACCTCAGAGAAGCTAAATATGGTTCCAGGCAACAGAGCTACTCCACTC	ENSMUST00000043183	Ces2g
CES2H_30979	GGATAGTGACCACTACTACATTCTCCATGGCTGCTAGCATGGATCCATCA	ENSMUST00000172032	Ces2h
CETN2_30963	TCACCCAACGGACTCTGCCACCGGTTGTTAAGGCAACGGCGTACTCGCAG	ENSMUST00000114551	Cetn2
CETN2_32055	TAGAGGCTGGTCTTTTTCATGATGCGCAGGAACTCTTGCTCATTGACCTC	ENSMUST00000114551	Cetn2
CETN3_30290	TCTCCATCGCCGTCTTTGTCAAACTCCTCTATCATGGCCCGGAGCTCCTC	ENSMUST00000022009	Cetn3
CFD_30145	ATGGTACGTGCGCAGATTGCAGGTTGTCCGGTTCATGATTGACACTCTGA	ENSMUST00000061653	Cfd
CFH_29193	CTGGCTGTCCAATCCACCGACTATTAACACATGTCACAGTGTCTGAGCCA	ENSMUST00000111976	Cfh
CFLAR_29126	GTACTCCATACACTGGCTCCAGACTCACCCTTGAGTTATACTTGATACTC	ENSMUST00000114309	Cflar
CGA_31055	CTCTGCAGGAGCAGTAAGAGCCCTTCAGTGTTGTGCTAGTTCTCCAGCCT	ENSMUST00000108130	Cga
CGA_32024	CTCCATCAGGAAGAGAATGAAGAATATGCAGGAACATGGACAGCATGACC	ENSMUST00000108130	Cga
CGRRF1_29491	CCCACCTTCTCCAACAAGCTCTGCTCCACACTTCTGTCTTCTGGAGACTC	ENSMUST00000068532	Cgrrf1
CHAC1_30202	CCAAACGCAATAAGTACTCAAGGTTGTGACCAGAGAAGCCTCGGCAAGCA	ENSMUST00000028780	Chac1
CHAT_30607	CTCGCTCCCACCGCTTCTGCAAACTCCACAGATGAGGTCTCTTTGCAGCC	ENSMUST00000070125	Chat
CHEK1_31431	CAGGAAACCAAACCTTCTGGCTGCTCACAACATCGCTGAGCTTCCCTTTA	ENSMUST00000034625	Chek1
CHEK2_30590	GAATAACTCCTAAACTCCAGCAGTCCACAGCGCGGCTGTACCCAGCAGTC	ENSMUST00000066160	Chek2
CHERP_29646	TTTCTCTTCTCCTGGCCCTTGCGCCGCCGTGCTCGCATCTTGGCTCGAAA	ENSMUST00000079510	Cherp
CHGB_29666	GGAAATTCGTCTGCCTTCTTCCTGTAGTGAAGCAGCTGGTCCAACTCGGC	ENSMUST00000028826	Chgb
CHIC2_30479	CAACTCCGGCAACCACAGCAACAGCCCGAGCCACCCGCAGCAGGAGCAGC	ENSMUST00000075452	Chic2
CHIL3_30648	GGGTCACTCAGGATAAAGGTATGCCCATATGCTGGAAATCCCACAATGAG	ENSMUST00000063062	Chil3
CHIL4_30146	ATAGTCACGCAAGTCTTGCTCACTTAAGTAAGTGATCTCATTATTCTTCA	ENSMUST00000082219	Chil4
CHKA_29307	GAGGCAGGTTGTAAGAGAGGATCTTGTGCAGTTGCTGAACTCTGGCCTCC	ENSMUST00000025760	Chka
CHKBCPT1B_29767	GCATTCTTGAGATCAGCACCCTCTCTCCCTTAATCTAGGAAATAGTAGGC	CHKBCPT1B	Chkbcpt1b
CHMP2A_29810	CGAAGTAGTTCCTCTGGCGTCTTCCGGCGCCCAAACAACAGGTCCATGGT	ENSMUST00000005711	Chmp2a
CHMP6_30297	TGGCTTCCAGGCTGCTGATCTGGTTTTCTGTCCTATCGAGCAGTTGCTCC	ENSMUST00000026434	Chmp6
CHN1_30496	GGTTGCCAGATTGTCACAGATGACTTTTGAGAGCCCAGTTTCATTCCCAA	ENSMUST00000102677	Chn1
CHN1_31954	GCTCTTCTAACAAGTGATGTCAACTGCGAATAAGCAAAGAGTTTCAGAGG	ENSMUST00000102677	Chn1
CHN2_30343	GAGAACCTCAGCGGCAGCAGACGATGGCTGGATTGCTGATACAAAGCTGT	ENSMUST00000146114	Chn2
CHN2_31966	AAAACAGAACATCTTCGTTTTCTATTAAAATCTGCACGATCAGCTTTTGG	ENSMUST00000146114	Chn2
CHP1_29131	TGGTCAGCCTCCTGGATGGTCCTGTCCGCAATACTGCCCAGCTGCTCATC	ENSMUST00000014221	Chp1
CHRNA1_31158	CTGCAAACACAGCCAGCGTCCCGATGAGACACACCAGCATAAAGACTCCG	ENSMUST00000028515	Chrna1
CHRNA3_29744	TAGCCTTCCTTGCAGCTTTTGGAGTCTGCACGGCTGAAGCAGTTCAGGTT	ENSMUST00000034851	Chrna3
CHRNB2_31207	TCTGTCCTCCAGTGCCCAATCCCATCGCTCCTTTCCCTTCCTGCTGAAGT	ENSMUST00000200558	Chrnb2
CHRNB2_32013	GAACACAGCCAAAGGAGGCCAAAGCTGAACAGCAGCGCCATAGAGTTGGA	ENSMUST00000200558	Chrnb2
CHST11_30790	ATCCGAAGCAAGTGGCCAGCACCATCCGGCAAATTCTGTTCATCCTCATC	ENSMUST00000040110	Chst11
CHTF18_29186	TACTGCCCATCAGGTGTGCGCTCCTGGTGGTAGGTGAGACTGTAGGCAAG	ENSMUST00000048054	Chtf18
CHUK_30211	AACAGCTCCTTGAGAACACGGTCCTGACTCTGCACGGTGTGCACGATGAT	ENSMUST00000026217	Chuk
CIAPIN1_31574	GTAGCCTGAAAACCCGCTCCGCGGACGCCGGCTTCTCGTCCTGGTCTCTC	ENSMUST00000162538	Ciapin1
CIB1_30318	GTGTCACTGAAGACACTCAGGAGGTCCAGGAAGTCCTCAAAGCTCAGGCT	ENSMUST00000065163	Cib1
CIDEC_30722	TTCTTCCTCGGTGGCATCCAGGAACTGCTGCATGTAGCTGGAGGTGCCAA	ENSMUST00000113089	Cidec
CIRBP_29906	CAACATTCTGTCCCAGCGACCACGCCAGCCCAGCTTCTTTATCTTTTCCA	ENSMUST00000054666	Cirbp
CIRBP_31851	TTGGAGAAGACCTGCTCCAGCGCCTGCTCGTTGGTGTCGAAGCTGAGTCC	ENSMUST00000054666	Cirbp
CIRH1A_30233	GTATGCAAGTGCTTGAAGCTTCCTTCCGACAGATGAACAATATGCAGAGA	ENSMUST00000047629	Cirh1a
CISD1_30125	CACTCACTGCCACTGCGCAGGCGCCGCGGCAAGCTGGGAGCGCGTGTGCC	ENSMUST00000045887	Cisd1
CKAP2L_30216	GCAACCTGTAATTTGATACCATGGTTATCCCACTCTGAAACAGGTATCCG	ENSMUST00000052708	Ckap2l
CKM_31031	CCAGCTTCTTCTCCATCTCCACCATAAGCTTCACGCCATCCACCACCAGC	ENSMUST00000208710	Ckm
CKMT2_30858	ACCTCTGATCTGCCGATCCGATCTATGTTGGAAATATCGTACACATCTGC	ENSMUST00000022122	Ckmt2
CKS1B_29816	CTCCCACCCTCTTTGGCCTCGCTTTCAAACACACCGCCCGCACTTCCTAT	ENSMUST00000029679	Cks1b
CKS1B_31964	TGGTTCATGGATCATATAGTGGACCCATCCCTGACTCTGCTGAACGCCGA	ENSMUST00000029679	Cks1b
CLDN11_30227	AGCAGACGATGACACAGCCACCCACCAGGCACATCACAGCACCGATCCAA	ENSMUST00000046174	Cldn11
CLDN5_31612	CGTACTTCTGTGACACCGGCACCGTCGGATCATAGAACTCGCGGACAACG	ENSMUST00000043577	Cldn5
CLDN7_30337	GGGTGCTCGGTACGCAGCTTTGCTTTCACTGCCTGGACAGGAGCAAGAGA	ENSMUST00000108597	Cldn7
CLEC14A_30929	GAACTGTGGTGCAAAGAGGTAGCCTCGGCATCACATTCCACACCTGGTGA	ENSMUST00000062254	Clec14a
CLEC1B_30187	AATACTGCTTGCTCTCTTCCCATGTTAGGTTACGCCTGAAGAACCCGTAG	ENSMUST00000032262	Clec1b
CLEC1B_31937	CCCATCTTCATCCTGCATGGCTCCCCTTGAACAGCAAAGAGCTCAGAGCT	ENSMUST00000032262	Clec1b
CLEC4A2_31434	TCTTGTTCCAAGATGCTGATGAAGAAACTGTGGGAACCAAGTAGCAGTGG	ENSMUST00000161365	Clec4a2
CLEC4E_29623	TGTGAAAGGTGTATCATCCACCCATTGCCACTGACCCTCCACCACCTGGT	ENSMUST00000032239	Clec4e
CLIC4_29389	CAGTCTGCTAATGTCATCTCATCGCCGTCCAGAAACCGACGTGTGGAAAA	ENSMUST00000037099	Clic4
CLIP3_31112	CCTGGAGCAAAGTCAGTCTTCCCATAGAAGCGCACAATCCCCTGCTTCTG	ENSMUST00000014065	Clip3
CLK1_29168	GTTTACAGCGCCGAGAAACATATCTGCCAGCAGAACTGTGTTCATCCCAA	ENSMUST00000034868	Clk1
CLK2_29542	TGTCTTTGAGGAAATCGAAGGTGCTAAGGCCCAGAAGCTCAAAGGAGATA	ENSMUST00000121212	Clk2
CLPX_30931	TGCTGATGATTCTGTCTAAGCCATTAAAGGCACCAGATGCCACAAACAAG	ENSMUST00000015501	Clpx
CLSPN_32267	AGCCAACGTTCACCTGCCATGGTTTTTGCAAAGCAGCACTGAATTCTGCT	ENSMUST00000048391	Clspn
CLSTN1_29421	CTGGTGATGTCTTCCTCTTCCTCCCCATCTTCGCTCTCCTCCTCCTCCTC	ENSMUST00000039144	Clstn1
CLTB_30121	GCGCAGGCGGGACACATCTTTACACTGCTTGCTGCTCTTGGGATTGAAGT	ENSMUST00000049575	Cltb
CLTC_29144	GACTGCACGAGTGTGATCCAACCGTGGAGACAGCACCATGAGCAAGTCAT	ENSMUST00000103186	Cltc
CLU_30840	CCACAGACAAGATCTCCTGGCACTTTTCACACTGGCCCTTCATCTTCAGG	ENSMUST00000022616	Clu
CMPK2_29189	CCTCAAGTTCAGCCTCTTCTTTAGTTTTCTCCTGACCCCGGCCCTGCAGT	ENSMUST00000020969	Cmpk2
CMYA5_30158	GCGTTTATAAACAGAAGTCTCTGGTTGGTATAGTCCAGCAGAATGCCCAC	ENSMUST00000062122	Cmya5
CNDP2_30037	TTGGCGAACTCTTCCATATCGAAGTCAATGTGGTCGTAGAGCGCATGCTC	ENSMUST00000025546	Cndp2
CNKSR3_29653	CCTCCTGGAATGGAATGGTGGCACTGCTGTGTAGGTCGGAGTTGATGTAG	ENSMUST00000150282	Cnksr3
CNN1_29788	ATGTTCCTGCCTTCTCTCAACTTCTCCGGCTCAAATCTCCGCTCTTGTTT	ENSMUST00000001384	Cnn1
CNN3_31195	AATGGTCGAGTTGTCCACTGGCTGTAATGTCAGCTTCTGGTCATAGATGT	ENSMUST00000029773	Cnn3
CNOT4_30520	TTGGCATTTGTAGGTGCAGCAGAGTGCAGGAATCCAGAGCCTGGCCCTTT	ENSMUST00000114993	Cnot4
CNPY3_29839	AACCGGTTGCTGCCAGTCCTCTCCTTGTGCAGGCTGTAGTCCAGAAGCCT	ENSMUST00000059844	Cnpy3
CNPY3_32000	TGGTGTACTTGACTCCAGAGCCCTTCCCGTCCAGGATGCCATAGCCGGTG	ENSMUST00000059844	Cnpy3
CNTF_31795	AAATCAACTGTCCCAGGAAACAAGTGAGCTGGTTTGCTTCTGTCTTCACT	ENSMUST00000112933	Cntf
COASY_31103	GCTCTGTGTGACATGTGACTCCCACAAGGTGCTCAGAACCACGTTGCTCT	ENSMUST00000107308	Coasy
COG2_29513	GATCTCCTGGCTTGTTTGAGGCGTTTCAGGCTTTCCTCCATCTTCTTCAC	ENSMUST00000034460	Cog2
COG4_29209	GAAGCCATCCTTCTTGCAGCAGGGTAAAGAAGTGGCCTCCCAGCTTCTCT	ENSMUST00000165867	Cog4
COG4_32061	TTGAAGGTGGATTTCAGGACCACTTTTTCCAGTTCAACAGCAACAAGGCT	ENSMUST00000165867	Cog4
COG7_29395	GGATCACGTCACAGTAGGTCTGCATAGTGGCTCTGGCAATGGAGCCCAGC	ENSMUST00000205438	Cog7
COIL_32155	GGAGCTGAAGGTAAAGCCAGGCTTTGAGGCCTGCCTGTTGGCAGCTGCAG	ENSMUST00000036649	Coil
COL12A1_30069	TATGAATTGCATCTCCAGGAAGAGTTGTCTCTCCAGCCTCAATGTCGTCG	ENSMUST00000071750	Col12a1
COL1A1_29427	TCTTCTGAGGCACAGACGGCTGAGTAGGGAACACACAGGTCTGACCTGTC	ENSMUST00000001547	Col1a1
COL1A2_31136	AACCCTGCAGAAGCACAGCCTTGTTCAAGCTGCCCGTCTCCTCATCCAGG	ENSMUST00000031668	Col1a2
COL2A1_29343	TGCCCTCGGCCCTCATCTCTACATCATTGGAGCCCTGGATGAGCAAGGCC	ENSMUST00000023123	Col2a1
COL3A1_30618	TTCAGCCTTGAATTCGCCTTCATTTGATCCCATCAGCTTCAGAGACTTCT	ENSMUST00000087883	Col3a1
COL4A1_29931	AGTAGTCGTTCCTGGAGGCGAAGTTGCAGACGTTGTTGATGTTGCAGAAG	ENSMUST00000033898	Col4a1
COL4A2_29932	TCTTCATGCACACTTGGCAGCGGCTGATGTGCGTGCGGATGAGGCCAGCC	ENSMUST00000033899	Col4a2
COL5A1_32244	AACTGCTGGATGCCCTGCTCATTGTAAATGGAGACTAGGAAGGCCTGGCT	ENSMUST00000028280	Col5a1
COL5A2_31305	AGGACCACAGCTTTCTTGAGGTTTTTAGCTTGATCATCCATATATCCAAC	ENSMUST00000086430	Col5a2
COL6A1_29782	CATCGTTGACGTCTGTGGCGTCGTTGATGAAATCCATGCTGTCCACAGAG	ENSMUST00000001147	Col6a1
COL6A2_29638	GTTCTGCTTACGCATAGAGTGCACTGACTCCTCCAGGCTGTCATTGCCGG	ENSMUST00000001181	Col6a2
COL6A2_31834	AAAGGACGTCTTCCATGTCATCGATGAACTTCTCGGCCACCAGGTCAGAG	ENSMUST00000001181	Col6a2
COL6A3_30778	ATGGCCCTGACCTGAGACTGCAGGTAGGAGACCACTACGACATGGTACAG	ENSMUST00000056925	Col6a3
COL8A1_29457	ACGTTGCCTCCCTTGCAGTGAACATGATAAGCAAAGTAGTAGACACCCGG	ENSMUST00000089332	Col8a1
COMMD6_30850	GTGATCTGCCACCTTCAGCATCACTGCCACGTAAGGATACTTGAGAGATC	ENSMUST00000100339	Commd6
COMT_31082	CCTGGACCCTGGTAGACTGCCTTCTCCAAGCCGTCCACCACTTTCATGTA	ENSMUST00000000335	Comt
COPA_31331	GCCACTTCAGGATAGCCCTTCTTCTGGAGATAAGCGATGATTGACTGGCC	ENSMUST00000135192	Copa
COPB1_31128	GAACTGGCTTCTCAATGCTGACATTTGCAAGTGCATCCTCTCCAAATATA	ENSMUST00000033012	Copb1
COPB2_29270	CTCTCCGCACCTTCTGCCAGCTTGTTCACCATACTAGCATTTCCAGAAGC	ENSMUST00000035033	Copb2
COPS5_29173	TGTCTCTAGTAGCTTTGGCAAGTTTGTCTTCCGACTTGCGGTCATGTGTT	ENSMUST00000027050	Cops5
COPS7A_30557	TCAACCTCTAGCCGCTGATTGCGCTGGTCCAGAGAGCCACGAAGGACATC	ENSMUST00000112439	Cops7a
CORO1A_31366	TCCAGCCTGTCCAGGCGCTCTTGTAGCTTTTGCACTATGGCGTTCAGATT	ENSMUST00000173108	Coro1a
COX6A2_30545	GGACCTTTAGAGGCAGAGCCATTGTCAAAGGGAGGCTAGGAATGGCACTG	ENSMUST00000033049	Cox6a2
COX6B1_29508	AAGATTGTCCCGGAGTAGCGTTACTTCAATGTGACCCTTAGCAAAGACGC	ENSMUST00000075738	Cox6b1
COX7A1_30621	CCTGGAAGAGCTTCTGCTTCTCTGCCACACGGTTTTCTAAGTGGCTTCTG	ENSMUST00000098594	Cox7a1
CPA1_30470	GTAGCTGTGGATGGAGATGAAGGCCTTGATGTTCCCGTGGCTCGTCACAA	ENSMUST00000031806	Cpa1
CPA3_30586	GAAGAAGAAACCCAGACTTTCCTTTATCACGAAGCTCAAAGGCAAATGTG	ENSMUST00000001921	Cpa3
CPB1_29216	AGTCGTAGGAGTAAGGATAGAGCATCATCTGTGAGTAGGAGTGGACGGTC	ENSMUST00000011607	Cpb1
CPNE3_29704	AGCTTGGCTGCATTGACGATTGCCTGTCTGGTTTCATCAAGGTCTGTGAT	ENSMUST00000029885	Cpne3
CPNE6_29310	CGTTGCCCACACCCACGATGATGATTGACATGGGCAGGCGGGAGGCTCGC	ENSMUST00000165262	Cpne6
CPS1_31199	CCTGGAAATTGGTGAGGAGAGCAATTCCACTGTCCACAGCTGTCCTCCGA	ENSMUST00000027144	Cps1
CPSF1_29470	TGGTAACGCAGCAGTGAGATGCTCTTCATGACGTCTGCTGCCAGGATGAA	ENSMUST00000071898	Cpsf1
CPSF4_31218	TCATGCAAGAACTCACACTGGTCCCCTTTCTTGCACAGTCCTCTCAGCCA	ENSMUST00000160629	Cpsf4
CPSF4L_31365	TCAAGTGCACTTTGTTCTCCTGGCTCATGAATGACTCCTCCCTTCCACAG	ENSMUST00000173655	Cpsf4l
CPT1B_31741	GGTGGCAACGTGGTGTTTGGCTCACCCACACAGTGTCCTGTCTCCGTGTA	ENSMUST00000109313	Cpt1b
CR2_29896	GGAATACACTGAGGAGGTGGACTATTCCAGATGCCAACTTGATTGTCTTT	ENSMUST00000043104	Cr2
CREB1_29283	TCCATCAGTGGTCTGTGCATACTGTAGAATGGTAGTACCCGGCTGAGTGG	ENSMUST00000049932	Creb1
CREB3L3_30039	GAGTTGTCTAGCTCTTCTGTCAGGTTGTCCAACATTGGAATTTCCAGAAA	ENSMUST00000117422	Creb3l3
CREBBP_31272	CTACAAACCCTCCACAAACTTTTCTAGTGTGTCTCCCGTGGTATCACCAA	ENSMUST00000023165	Crebbp
CREG1_29865	CTTCTCCCGGAGGACCGTCACTGATTGAGATGATGTCCGCGAAGGGCCAG	ENSMUST00000111432	Creg1
CREG1_32043	AGTTATGGCTGGAAGGCCAGTGCTTCATCTCAGGGTGTCGAACAAACAGC	ENSMUST00000111432	Creg1
CRELD2_31000	TCTGCAAGCTGAAGAAGCCGTCTGTGCAGTCAATACACAGTGGTCCCTTG	ENSMUST00000024042	Creld2
CRIM1_29739	CAGCTGTCAATATCCCACCGTTCCTCGTCAGCATAGGTCTTCCCACTGAA	ENSMUST00000112498	Crim1
CRK_31596	AATGGGAAGTGACCTCGTTTGCCATTACACTCCCCTTCCCACTGACCACT	ENSMUST00000017920	Crk
CRK_31833	CCAGTACCAGCTACTCCGCTCCTCCGAGTCGAAGTTGCCCGCCATGGCCG	ENSMUST00000017920	Crk
CRKL_29643	CATGTGGCGAAGACCTCACAAGCTTTTCAACGTAAGGGACAGGAATCATC	ENSMUST00000006293	Crkl
CRMP1_30861	GGTTGGTGTTTAGAAGGCGAGGATTTGGCAGAAGGAGCAGGAGCAGCATG	ENSMUST00000114158	Crmp1
CRP_29572	CACAAAGTCCCACATGTTCACATCTCCGATGTCTCCCACCAAAGACTGCT	ENSMUST00000038495	Crp
CRTAP_30172	CACTTGTCCCGGTGGTACTGATAGTACACCAGGTTCTGTTGCATGACCCT	ENSMUST00000084881	Crtap
CRY1_31531	GGTCATGCACTTTCCTATCACATCTGATGTGATGGTGTCTGCTGGCATCT	ENSMUST00000020227	Cry1
CRYAA_32222	TTGTGTTTGCCGTGAATCTCCACAAAATCCTCCAGTACCTTCACGGTGAG	ENSMUST00000019192	Cryaa
CRYAB_30937	GGTGGTGGATGGCGATGTCCATTGTGGCTAGATGAATGCAGAGTCGGTTG	ENSMUST00000034562	Cryab
CRYBA1_29355	CCTTAAGTGACCGGACATTATCAAAATTACGTTCAGAGACATTTGGGCAG	ENSMUST00000078623	Cryba1
CRYGB_31467	GAGCCAACTTTGGCATTTGCAGCCCCCCAGTCAAGATATCTCCTGTACTC	ENSMUST00000027090	Crygb
CRYGC_31285	AAGCGATCCTGGATGCAGGAGCAATCCTCGCTCAGCTCCATCATGACACC	ENSMUST00000027089	Crygc
CRYGS_30347	TACCACCTTACAGGAATGAATCTCTCGCAGGTGAAACTGCTCCATGATAG	ENSMUST00000040592	Crygs
CRYZ_29482	CGACTGGAGCTTCAGCACTTCTGGTCCACCAAACTCAAACACTCGAATAG	ENSMUST00000192462	Cryz
CS_30610	ATTGAGTGTGTTCCAGATGTAGTCTCGTAACTTCTCATCTGACACGTCTT	ENSMUST00000005826	Cs
CSE1L_31191	CAGCTGTGAGAAGGCAGTCTGGTATCCTGGTGTATCTTCTATGTCAATGA	ENSMUST00000002790	Cse1l
CSF1R_30684	AAAGAAGGAGTCACTTGAAGAAGTCGAGACAGGCCTCATCTCCACGTAGG	ENSMUST00000025523	Csf1r
CSGALNACT1_30553	CAGGTGTGCGGACCACTATGAGGTTGCTATGGAGATATTTCCGGTACAGG	ENSMUST00000130214	Csgalnact1
CSK_29174	CCTGTGTCCTGAGTGCTGGAGGCTTCCTTAGTGAGGCCAAAGTCACTGAC	ENSMUST00000034863	Csk
CSNK1A1_30151	TAAGTACGGTCTTCATAGTGAACCTCCTTGAACAGAAGTTGAAGAGGTCT	ENSMUST00000163205	Csnk1a1
CSNK1E_31607	TAAGTCGCAGCCCTGCCTCTGAGGCGCCCAGGCACCCAGCTTTCACAGGC	ENSMUST00000122044	Csnk1e
CSNK1E_31995	AGGACCTCGATTGGCGTTGACATCTTCTTCTCGCTAATCCGCTCGTACTT	ENSMUST00000122044	Csnk1e
CSNK1G2_30311	CAGTCATACTCGTAGTCAAACACGTAGCCGCTGCGGTCAAAGAGGTCAGT	ENSMUST00000085435	Csnk1g2
CSNK2A2_30199	TACCTCTTGATAACTACAAGCAGTCAGAAGTCATTCAGGACTAATGCAGA	ENSMUST00000056919	Csnk2a2
CSPRS_29669	CAGACAGTAACTCACAAGAATGACAGATAAAAGAAAGGCAAGGGAAAACA	ENSMUST00000078827	Csprs
CSRP1_30002	GGCTCAGCAGGATAACGCCTTTCCTTGAGGCCTTTTCTCTCCTCCATCTT	ENSMUST00000097561	Csrp1
CSRP1_31845	TCATGCTTGATGCCCAGAGACTCCCCCTTGTCTGTGCTCAGCGTGCCTGC	ENSMUST00000097561	Csrp1
CSRP3_30783	CATACCTGCGCCCATAGCACACCTTACAGTAGATCTCTGACTCATGAGCT	ENSMUST00000167786	Csrp3
CTCF_30230	TTTGTTGGCTTCGGAGGCTTCATATTACCAACTACTTTCTCTGCATTAAC	ENSMUST00000005841	Ctcf
CTH_30455	AAACGAGCCACCGCCATCCCATTCTTGAAATGTTTCTCCATCCGGACCTG	ENSMUST00000118539	Cth
CTLA2A_30798	GCTTCTGTTCACAGATAGAAACCATCATTTTGTTGTCCACGGTCTCTGAA	ENSMUST00000021880	Ctla2a
CTNNAL1_29533	CATTTCGTTTCCAAACTGGCTGAATATCTGAACAAATTCCTGAAAGCTGT	ENSMUST00000107612	Ctnnal1
CTNNB1_31871	TGGTCAGCTCGACTGAAAGCCGCTTCTTGTAATCCTGTGGCTTGTCCTCA	ENSMUST00000007130	Ctnnb1
CTNND1_31768	CCAGGATCTTTCCTGCCTTTCTCCTCTCCCTCCGTGTCTGTCTCGCTCGC	ENSMUST00000111694	Ctnnd1
CTNND1_31807	GGAAAAAAATTTAAAAAGCACACACCTCAAATGTGGACTTCTAAAGCCAG	ENSMUST00000111694	Ctnnd1
CTRB1_30486	ACGGCAGACACAGTCTCAGAGAACTGGGCAGGAGTGGCCAGCTTCAGCAG	ENSMUST00000034435	Ctrb1
CTSD_29043	AGCTTAAAGCCAGAGGTCGCCGGCTTATAGGCAGGATGACGCCGCAGTCC	ENSMUST00000151120	Ctsd
CTSG_29756	ATCTGAGTCTGGCTGTTGTAGAACTGGAAGCGATTGGCGCACATTTGGTC	ENSMUST00000015583	Ctsg
CTSS_31474	ATAGGAAGCGTCTGCCTCTATGCCCCCATTATCAATGATGTACTGGAAAG	ENSMUST00000015667	Ctss
CTTN_31078	GCCAATCTCTCCTTGTAATCAAACCCCACAGCGGAGGAGTCCTGCCTCTC	ENSMUST00000103079	Cttn
CTTN_31891	GTCTTGCCCTGGTAGTCAAAGCCCACGGCACTCTTGTCTACACGGTCAGC	ENSMUST00000103079	Cttn
CTTNBP2_31223	TGTTCGTGTTTGTCTAAGGTCCAATTCTCTTCTTTGGAGTTGTTGTTGAT	ENSMUST00000090601	Cttnbp2
CUL1_29134	TTAATCTGAGTGCTGTCAGTCAACTGCTGCACAGTATAGGCGTCTTCTGT	ENSMUST00000031697	Cul1
CUL1_31957	GATTCTGACTCCTGTTTGATGACATTGTGAGCAATGTTCTGAAGTTGTCC	ENSMUST00000031697	Cul1
CXCL1_29501	GGCAACACCTTCAAGCTCTGGATGTTCTTGAGGTGAATCCCAGCCATGGT	ENSMUST00000031327	Cxcl1
CXCL10_29431	TGATTTCAAGCTTCCCTATGGCCCTCATTCTCACTGGCCCGTCATCGATA	ENSMUST00000038816	Cxcl10
CXCL12_31252	GTTTAAAGCTTTCTCCAGGTACTCTTGGATCCACTTTAATTTCGGGTCAA	ENSMUST00000112871	Cxcl12
CXCL2_29356	GTCACACTCAAGCTCTGGATGTTCTTGAAGTCAACCCTTGGCAGGGTCTT	ENSMUST00000075433	Cxcl2
CXCL3_29500	CACCGTCAAGCTCTGGATGGTCTCAAAATCAACCCTTGGTAGGGTGTTCA	ENSMUST00000031326	Cxcl3
CXCL5_30049	GATCACCTCCAAATTAGCGATCAATTTGGGATTAATTTTTGGAGTTACGG	ENSMUST00000031318	Cxcl5
CXCR2_32123	AAGAACTCCTTGCTGACAAGGCCATAAGTAGCCATGATCTTGAGAAGTCC	ENSMUST00000027372	Cxcr2
CXCR4_31575	CCGTGGAGACGGAAGAGTGTCCACCCCGCTTTCCTTTGGAAAGGATCTTG	ENSMUST00000052172	Cxcr4
CXCR5_31005	GGTAAGGAGTCGTTGTTATGAGGTTGGCCAACCTTGGCAAAGAGGAGTTC	ENSMUST00000179828	Cxcr5
CXCR6_30322	CAGCCACTACAAGGAAGATGATCTTTAGAGATTTGTGCTTCTGGAAGTTT	ENSMUST00000049810	Cxcr6
CYB561_29096	GCTTCCAGTCAGCCTGAGCCAAGATGTAGAGCACAACCACCCCAAAACAG	ENSMUST00000019734	Cyb561
CYBB_29167	AAATGAAGTGGACTCCACGCGGGCCGGATTCTGAGTTGGAGATGCTCTGT	ENSMUST00000015484	Cybb
CYCS_30865	CTCGAAGACAGACGTCCCGCGCTCTAGCCCAAGGACACGCCGGCCCGCGC	ENSMUST00000161401	Cycs
CYP11A1_29361	CTTCCTGCTGCACGAGTGTCTCTGCCCCAAACCTCCAGAGCCACACTTAT	ENSMUST00000034874	Cyp11a1
CYP11B1_29088	CAGAGTTCTCTCAGCTACCAGCTCTGCTGTGACACTCCAGGACTGTGGAC	ENSMUST00000170259	Cyp11b1
CYP11B2_29245	ATATTAGTTCCGCCACAATGCCACTGTAGGTCTGAGAGCTGCCGAGTCTG	ENSMUST00000167634	Cyp11b2
CYP17A1_30664	TATGTCCACCAGATCGCTGTGGCCCAGGACATCCACAATACCCTCTGTAA	ENSMUST00000026012	Cyp17a1
CYP19A1_29642	TGGATCTCCTTCAGGATTGCTGCTTCGACCTCTGGATACTCTGCGACGAG	ENSMUST00000034811	Cyp19a1
CYP1A1_29719	AAGATGGCCAGGAAGAGAAAGACCTCCGATCGGCCAATGGTCTCTCCGAT	ENSMUST00000034865	Cyp1a1
CYP1A2_29175	TGTCAGGTCCACCTTCACACCCGGTGGCACACTAAACTCCAGATGCTGCA	ENSMUST00000034860	Cyp1a2
CYP1B1_30033	TATAGGCCGAGCGTCGCTGCGTCTTCCAGTGCTCAGAGTAGTGACCGAAC	ENSMUST00000024894	Cyp1b1
CYP24A1_31550	TAGTAGCAGGCGACCCGTGACACTCGAGGAGCAGTAGGGACTGAAATGGG	ENSMUST00000038824	Cyp24a1
CYP26B1_31307	TAGCACTCAACATGGCCTCTGTCTCCGGCAGAATCTCATTCTGGTTGGAG	ENSMUST00000077705	Cyp26b1
CYP2A4_30021	GTCCACCAGAGCTTCCTTGACTGTCTCCTGTCCGCACAGCACCACAATTC	ENSMUST00000098657	Cyp2a4
CYP2A5_31713	GTCCACCAGAGCTTCCTTGACTGCCTCCTGTCCGCACAGCACCACAATTC	ENSMUST00000005685	Cyp2a5
CYP2B10_30803	CCCTGGCTAAGAGTAACAAGAAGCCCACAAGGAGAGCAAGGAGGAGCAGG	ENSMUST00000072438	Cyp2b10
CYP2C29_31205	CAGGAGTAGGAGAGCATATCTCAGTGTTGTGCTTGTGGTCTCTGTCCCTG	ENSMUST00000003137	Cyp2c29
CYP2C38_32195	GGCCAGGAGGGAGCCTCCCTCTTCTAGACCTCTGTCTCCATAGTGAGAGG	ENSMUST00000035488	Cyp2c38
CYP2C39_32171	TCTACCATTGGAATGCTTCCTCTATCAGAAAACTCCTCCCCATGATCAAT	ENSMUST00000025968	Cyp2c39
CYP2C54_30019	GGAGAGCATATCTCAGTGTTGTGCTCATTGACTCTGTCCCACCAATAAAA	ENSMUST00000048959	Cyp2c54
CYP2C55_29661	GGAGCAAGAGTCCATATCTTAGAGTAATGTTTGTGGTTTCTGTTCCAGCT	ENSMUST00000025966	Cyp2c55
CYP2C65_31273	AGCAAACTCCTCCCCATGATCAGTAAAGGCTTCTTTCACAGCTTCATATC	ENSMUST00000087236	Cyp2c65
CYP2D9_31050	TTGAGGTGGTCAGCATCCCTGCACCAAACAGGTCACGCACCACCATGAGC	ENSMUST00000089129	Cyp2d9
CYP2E1_29238	GTATTTCATGAGAATCAGGAGCCCATATCTCAGAGTTGTGCTGGTGGTCT	ENSMUST00000026552	Cyp2e1
CYP2F2_29082	ATGACGTCAGCAAAGCGTTGCACTTCGTGGATCACTGCATCTGTGTAAGG	ENSMUST00000003100	Cyp2f2
CYP2J5_31457	TGATTAAAGGCAGTCCTGATACAACCACCACTGGTGATTGGCCCAACTCC	ENSMUST00000030299	Cyp2j5
CYP2W1_29523	GTGGTTTGGGTTGAACTGGCTTGGGGTCTCCCACTGCGTCTTGTCCAGGA	ENSMUST00000031521	Cyp2w1
CYP3A11_30591	CTGTGTTCTCCCTACAACTGTGTGTGTGATCCTCCTCAATGCTTCCCTCT	ENSMUST00000035918	Cyp3a11
CYP3A16_32225	CACTGTTGACCCTTTCGGGATATAAATACCATTGATTTCAACATCCTTTT	ENSMUST00000031633	Cyp3a16
CYP3A41A_30418	CAAACCTCATGCCAATGCAGTTCCTGGGTCCAATTCCAAAGGGCATATAT	ENSMUST00000094111	Cyp3a41a
CYP3A41B_30917	GGGACAGCAAAGCTCTATATCTCTTCCATTCCTCATCCTTAGATATTGAG	ENSMUST00000075837	Cyp3a41b
CYP3A44_29466	CAGGGTGAGTGGCCAAACAATACAAGGTGAAGGAAAGTGTGCTACTGGTG	ENSMUST00000067479	Cyp3a44
CYP46A1_29972	CTTGAGCGTAGCCTGCTCTTGCAGCCCAAAGCGCTGCCCAGGCACTAGCC	ENSMUST00000021684	Cyp46a1
CYP4A10_31160	TGGAGAAACTCGTGTGAGGATTAATCAGGTAGAAAGAGACTATGCAGGGT	ENSMUST00000058785	Cyp4a10
CYP4A12A_29072	CAAGTTTGCAGGCACTGTTAGCCTTGCAGCCATTAGAGGACACTCTGTAG	ENSMUST00000084343	Cyp4a12a
CYP4A14_29351	AGCTGAGCTCTCGACTCACAGATATTACTGGTGGATAGAGCCTCAGGGCC	ENSMUST00000030487	Cyp4a14
CYP4A31_29350	TGTACTGAGTTCTCTGCCAATGCTTGGGACAGGTGGGTAGAGCCTTAGGG	ENSMUST00000030486	Cyp4a31
CYP4F37_31014	CAGGTTTGGAGTCCTTCAGCACTGTGCTCAGCGGCTCCACCCGCAGCCAC	ENSMUST00000077639	Cyp4f37
CYP51_31352	CCTCCATCCAGGTCTGCGTACAGCTGAGCCACCTTCTCGTTGAGTTGACT	ENSMUST00000001507	Cyp51
CYP7A1_30680	TCAAGGTGTAGAGTGAAGTCCTCCTTAGCTGTCCGGATATTCAAGGATGC	ENSMUST00000029905	Cyp7a1
CYP8B1_31173	GAGCCACCTTATCTCCGCGACGGATCTGGTACTCTTGTCCGCTGGCCATC	ENSMUST00000062474	Cyp8b1
CYTB_31381	GATATTTGTCCTCATGGAAGGACGTAGCCTATAAATGCTGTGGCTATGAC	CYTB	Cytb
CYTH1_31459	GATGCGGTACACAGTGTGGTTCCCTTCCACCACTCGCCCGTCCGCCTCTG	ENSMUST00000106305	Cyth1
CYTH2_30219	CGGTTCATGGCCACAAAGCGCTCCAGGCCCGGCTTGTCCCTGACATTGGG	ENSMUST00000056820	Cyth2
D030056L22RIK_30499	TCCTTCATTCTTGTCCTCAAGTGTCTCTGTCAGGCTGTTTGCACTCACAT	ENSMUST00000062753	D030056l22rik
D430019H16RIK_30401	ATGGCAATCCATAGCAGAACAGCATCGTTGGAGGAGCGAGGAGACTCCTC	ENSMUST00000178224	D430019h16rik
D530037H12RIK_30454	AAGCAACAGTGTGACTTCACATGTCCATAATGTCCAGGAAATGGCGTTTG	D530037H12RIK	D530037h12rik
D930003E18RIK_30181	ACTGCATCCTAATTCTATCTCCTCTTGACAGGCCGGCAAATGCTGTTATC	D930003E18RIK	D930003e18rik
DAAM1_29937	TGAAAGGTCTTTGTCGAACACCTCTCCTGAGCGCAGCGCCGAGACCAGGT	ENSMUST00000085299	Daam1
DAF2_29966	ACATCAGACTTGCTCACAGTACAATATATGGTAGAATTTCCAAACAGGAT	DAF2	Daf2
DAG1_29892	GCGATAGCAGATCATAGCAATGATTCCAGCAATGAGCAGGATGGCCGCGA	ENSMUST00000191899	Dag1
DAPK1_30900	GTAGGACGTGCCACTGTTACAGCTTGAGGCATAGGCCTCCTGGCCATTGC	ENSMUST00000044083	Dapk1
DAXX_31547	CTAGATCCTCATCTTCATCTTCAGTAGCCTCTTTCTCCTCCTCTTCCTCC	ENSMUST00000079421	Daxx
DAZL_31643	CCTTGAAGTAGTCATCTTGAGTAACAAGAGAGTTTCTCAGTCTGTTCTCA	ENSMUST00000010736	Dazl
DBH_29520	CCCTGGCGAGCACAGTAACCACCTTCCTGCCCGTCAGGTGTGTATGAAGC	ENSMUST00000000910	Dbh
DBP_31391	TCTGTTCCTCAGGCACCTGGACTTTCCTTGCCTTCTTCATGATTGGTTGA	ENSMUST00000080885	Dbp
DCC_31107	AAGGCAGACCCTGTGATGGCGTTGAGTTGCTTCATTAGCCCTTCCAAACT	ENSMUST00000114943	Dcc
DCK_29617	GACTGGAAGGTGAAAGACCACCGTTCAGGTTTCTCATACATCATTTGAAG	ENSMUST00000031311	Dck
DCLK1_30356	TGGAAGCTGCGACCGCTAGTGCACTGATGCGCTGGAGCTGGTCCTCATTG	ENSMUST00000167204	Dclk1
DCLK1_32007	CCCTCTGCTTCCGCAGGCTTCCTGGGCTGGTGGGTGATGGACTTGGTGAC	ENSMUST00000167204	Dclk1
DCLRE1C_29496	TCTAGTGGCAGTGCCTTCATTGAAAACAGCTCAGGCTGAAGAGTTAGCTG	ENSMUST00000061852	Dclre1c
DCLRE1C_31984	AAATACTCGTAGCCATAAGCTGCTTTACAGTTCAGCCACACGACGTGGTG	ENSMUST00000061852	Dclre1c
DCP1B_29958	TCTGGAGCTGGAAGTCCAGGTCTTTAGTAATGGGTTCTGTTCTGTTTTCC	ENSMUST00000112777	Dcp1b
DCPP1_30851	AAAGCCGAAGGAGTGTATGTGCCCTGGGCTGCAATGATGTGCTCTTCCTT	ENSMUST00000068580	Dcpp1
DCPP2_30457	ACTATCTGAGTTAAAGCAGAAGGATTATATGTGCCTTCGACCCCAATGAT	ENSMUST00000168272	Dcpp2
DCTD_30870	TACACGGGAACAAGGCGACGTACATGCTGCAGCCCTTCACATCAGCCGAG	ENSMUST00000174278	Dctd
DCTD_32014	CAGCTTATTTTCTGCTGTTCTCCTCCAAGGCAACAGGTCATCACTGCACC	ENSMUST00000174278	Dctd
DCTN1_31125	AGCACCAGGCGGTGTCGCTGTCCTAGGCCTGCCGCGCATGAAAAGGTCAC	ENSMUST00000113913	Dctn1
DCTPP1_30412	CTCCCACCAAGGCTAGCAGCAGGTTCCGAGGCTGGTGGAACTGCTCCCAG	ENSMUST00000035276	Dctpp1
DCUN1D4_30512	ATGCTCCGTCTTCATCGTAGTTGCTGAGGTCGAGACTAATCGTTCTGCTG	ENSMUST00000087181	Dcun1d4
DCX_31317	CAATCTCTCTATGCCTTTGTTGTCTGAGCTCCAAGCAAGAAATTCCTGCC	ENSMUST00000033642	Dcx
DCX_31958	GAAAGAAAACCAATCTCTCTATGCCTTTGTTGTCTGAGCTCCAAGCAAGA	ENSMUST00000033642	Dcx
DDB2_31569	GAAGTAATACCGGAGTATCCTGGATCATAGAGCTGACACATCATCTTCCC	ENSMUST00000111352	Ddb2
DDIAS_30391	GGAAGCACCATTTAAGCCATGAATTCTTTGGTGGAAGCCTGCAACTGGAG	ENSMUST00000032877	Ddias
DDIT3_29142	GCTTGGTGCAGGCTGACCATGCGGTCGATCAGAGCCCGCCGTGTGGTCTC	ENSMUST00000026475	Ddit3
DDIT4_29434	TCTTGATGACTCTGAAGCCGGTACTTAGCGTCAGGGACTGGCTGTAACCA	ENSMUST00000020308	Ddit4
DDR1_29774	ATCATCCGCCAGGAACCGATGAAGCTGGGCGAAGGGCGGCCGCTGCTCGG	ENSMUST00000117301	Ddr1
DDX10_30691	GGCCTTCTTTCCATGACGACTTCTTGGTCTTACATCATCGTCTTCAGTGT	ENSMUST00000065630	Ddx10
DDX39_30413	CTTTGTCTCTGTAACTCTTTGCTGTTTGAGGCAGCCTGGAGTGTATGAGA	ENSMUST00000172396	Ddx39
DDX39_32102	TTCTCACTGTCCTTGAGCTTGACGTAATACTGCTGCAGCCCATGCAGTGT	ENSMUST00000172396	Ddx39
DDX3Y_30721	CGGCTACTTCCCTTGTAGTGGTGTTCATAAGCCATACTTTCCAACCAAGA	ENSMUST00000091190	Ddx3y
DDX42_31192	GTATGACGGCTACCACTTTCTGGATAACGGTATCCATCTCCATGGCGCCC	ENSMUST00000021046	Ddx42
DECR1_29509	GCTCCATTAATCCAAGAGGCATAATCACTGCATAGGAAAGTGGCCAGATT	ENSMUST00000029877	Decr1
DEGS1_29059	CATCCGTCACAAAGTCATAGAGCACCTTGATCCAGGAGTTGTAGTGCGGG	ENSMUST00000035295	Degs1
DENND2D_29479	TCTTCACAAATCGGCGCTTGGTCTTGGAGGTAACAGCCTTACAGAAGGAT	ENSMUST00000029508	Dennd2d
DEPDC1A_30380	TGCTATCATTGCCGGGCTGAGAGGCTGCGGAAAGTGCGCGGTAGCAGGAA	ENSMUST00000120272	Depdc1a
DEPDC1B_30508	TCAGAATCTCCTGGTAATTGTCCATCAGGAATGTCACCAATCGAGCAGCT	ENSMUST00000051594	Depdc1b
DERA_29246	GTAGACGTTGGTGAGAGAGCCCAGTTCGCCCGTAGCTAGGATGGTTTTGA	ENSMUST00000087675	Dera
DERA_31847	TCTCGATGTCTGAGAGCAGAGAACTGGCCCCTATCCGGAAGAGGTCAGGC	ENSMUST00000087675	Dera
DFFA_29558	TCAGTGTGGTAAGGATCTGGCTTCTGAGCAGCACTTCCGAAGCCATCTCT	ENSMUST00000030816	Dffa
DFFB_31116	GCGATGTGCACCAGCTTCAGGTTCTCGGCAGTGAAGAGCAGGCTGTAGAA	ENSMUST00000030893	Dffb
DHCR7_30763	CGCTCCCAATCACGGCCATACTTGTTGGCACAGCGGTGTTCATCACGGAG	ENSMUST00000073878	Dhcr7
DHDDS_29913	TTAGGCAGATGCAGTGCCCCAAAGTGCCAGCCAGTTGGCCCGTTTAAGTT	ENSMUST00000144668	Dhdds
DHFR_31629	ATCCTACCAGCCTTCACGCTAGGATTGCCGTCAAGTTTGGCGCGAAATCG	ENSMUST00000022218	Dhfr
DHRS7_32154	CAACAGCACAGGATGGTCAGAGATCCAGACTTCCTTCAGATCATTGGCCA	ENSMUST00000021512	Dhrs7
DHRS7C_30080	ACGGTGCTGACCACAACATCGTATTCCTCAACCTCGGCTCGGAGGCAGTC	ENSMUST00000168612	Dhrs7c
DHX29_29269	TACAGGCCAGCAGCCAGCACAGCTTTAAGAAGAGCAATGTCCTGGAAAGA	ENSMUST00000038574	Dhx29
DIO1_31468	GAGGCAAAGTCATCTACGAGTCTCTTGAACTGGTCAAATTTGAGAAGAAA	ENSMUST00000082426	Dio1
DIO1_31911	GGAACAGCGTCATTAGCACCTTGCCTACAGCCACCTCCAAGGCCACCTGC	ENSMUST00000082426	Dio1
DIS3_30964	GATTGAGTCCACGGAGACTAGTGGTAATATCATCATTCATAGCCGCCGAA	ENSMUST00000042471	Dis3
DKC1_31185	CTGTAGACTCCTATGGTGTGAGACCCGTCCGGGCACGTCATTAGGACCCG	ENSMUST00000033776	Dkc1
DLD_30294	TGGTCCTAGAATATGTGCTCCCAGCACTCTATCTGTTGACTTATGTCCAA	ENSMUST00000110857	Dld
DLG3_31930	TTAATGACGTGCAGAATGTCACCATAAGAGAAACTGAGTCCCTGGCTTGG	ENSMUST00000087984	Dlg3
DLG3_32206	CCGTTGTGGCTTCTGGGCCGAGGCCCAGCGGCAAAGAAGAATCGGGCGCC	ENSMUST00000087984	Dlg3
DLGAP5_31047	CCTCGAACGAGGCTTGCGATAGGTTGGTTCTGTGCGACATTTAAATTGTT	ENSMUST00000043296	Dlgap5
DLL1_30730	GCACTTGGTGTCACGTTTGCTGTGTGTATCCCTGACCGTGGCTTCATCTC	ENSMUST00000014917	Dll1
DLX1_29155	GGACCACTTCTTCTTGAGGTCACCTAGTCCGGTGCGGAGCGCCGCTCCAG	ENSMUST00000037119	Dlx1
DMGDH_30119	ACCTTGCCCTTGTACCAAATGCTTTCATTTCCCTCTGGATCCACATCGTC	ENSMUST00000048001	Dmgdh
DMTF1_29066	ACTGGCTAAGTCAGACGGCGGTTCTTCCTGCTTAAGGTCAGTGTCGGCAA	ENSMUST00000071921	Dmtf1
DNA2_31552	TACTCCTAACAAAGGACACCAGGATGAGACTCTTGTCCCTTCCTTGGTAT	ENSMUST00000131422	Dna2
DNAJA3_30336	CAGACTAGAACACTCTAAGTCCACTGCCAGGCAAGCTGCCATCTGAGGTG	ENSMUST00000060067	Dnaja3
DNAJB1_30167	AACCTGCTCCAGGATGGTTCTGGATGAGACGGGAATCCTTTCCGGGAAGA	ENSMUST00000005620	Dnajb1
DNAJB2_31695	TCAGAGAATGTGGCAGCGAGAGGCCTTCTCCTCTGAGGACGGGCTGAGTT	ENSMUST00000188931	Dnajb2
DNAJB2_31866	TGCCCATGCTGTCGTTGCTGTGCCCCCCGCCCACCTGCTGGCTTCTGCCC	ENSMUST00000188931	Dnajb2
DNAJB6_29809	ATATTTGTCGTAGATGTCCCGCTTTTTAGCATCCGATAACACTTCATATG	ENSMUST00000196528	Dnajb6
DNAJC15_30668	GCAGAAGGAGGCAGGTATTCGGCGTAGCGCAGCCCCTCTCTGGAGGTCAC	ENSMUST00000022590	Dnajc15
DNAJC9_29279	CCATGATCTGGTCCATGTCGCCCTTGAAGTCCAGATAGGCCTGCTTAATA	ENSMUST00000022345	Dnajc9
DNER_29230	ACCTGGCATGCCGGATGGATGCGATGGCATTGCTGAACTCACTGTCAATG	ENSMUST00000049126	Dner
DNM1_29660	GACACAGCCAGGATAAGGCAGTTCTCCTTAGTGACGAACTGCATAAGCAT	ENSMUST00000078352	Dnm1
DNM1L_30241	ATGTCCTCGGATTCAGTCAGAAGGTCATCTAATAAGGATGACTTATACAG	ENSMUST00000096229	Dnm1l
DNMT1_29736	AGCGCAGTGTGAGCTTCAGCACCATGGAGCGTCTGTAGGACACGAAGTTC	ENSMUST00000178110	Dnmt1
DNMT3A_30704	TGCACTTCCACAGCCTTGCCACTGTCACTTTCATCACTGTCATGGCAAGC	ENSMUST00000020991	Dnmt3a
DNTTIP2_31355	CAGACTGCTGGCTTTCATCGCTGCTAAGAAATAATAAGACAGGACTGTCC	ENSMUST00000035776	Dnttip2
DPH2_31263	CTCTATGAGATACAGTCTTCGTGCTCTTAGTCTCCCAGCCTTGGCACCCT	ENSMUST00000030265	Dph2
DPM1_30630	GGTAGCAAAGAGAGTCAATAACCCTTTCAGGAACGAGACTATTTCATTTC	ENSMUST00000154111	Dpm1
DPM2_30171	AGAGAATCACCCAAGTGGTGTAGTAGGTGAAGATGATCAAGCTAACGGCG	ENSMUST00000028151	Dpm2
DPP6_30244	TGAAACATTCCACAAAGAAGCCGATGATGGACCTGGACAGGTGCTGCTTG	ENSMUST00000071500	Dpp6
DPPA3_30575	TCTCTGATGGTTCCTCCATGGCGATGCGATGGGCAGAAGCCTCAAAAGCT	ENSMUST00000049644	Dppa3
DPPA5A_30060	GTCACCATCATCCTGCCAAGGAACCAGACTTCAGGGAAGACGAGATCAAG	ENSMUST00000071991	Dppa5a
DPT_31638	TGTAGGCATGCAGGCATAGTTCCATTGTCTGTCAGAGCCTTCCTTCTTGC	ENSMUST00000027861	Dpt
DPY30_29771	CCTGTAATAAGATAGGCACAACTGTCTGGTCCAGGTAGGCACGGGTGGGC	ENSMUST00000164832	Dpy30
DPYS_30354	GCAATTGGAACCGTTATTCAGTTCTAAATGTCATGTGTAATTTCATACAG	ENSMUST00000022915	Dpys
DPYS_31985	GCATGGCTCCATTCTTCACTCCAGTACTGTCTGCCATCAGTGCCGAGACC	ENSMUST00000022915	Dpys
DRAP1_31126	TGCTCAGAGTCTGTCCCGGACAGCTTCTTGTCTTTGCCTTTGCTTCCCGT	ENSMUST00000148219	Drap1
DRD2_31530	TGAGTGGTGTCTTCAGGTTGGCTCTGAAAGCTCGGCTGCTACGCTTGGTG	ENSMUST00000075764	Drd2
DSC2_30806	CTCAATGGTCTCTTGCCCTCCACTTTTGACTCCAGTTCCCATGGTGGTGA	ENSMUST00000039247	Dsc2
DSCC1_30128	GGAACACTCTGCTGCCACACTTCCTGAAACTCTGCAAGATTAAACTTCAC	ENSMUST00000023059	Dscc1
DSG2_30724	TGAACTTGAGCTTGCTGGACTGGCTTGTCTGTTATCTGCCCGTTACCATC	ENSMUST00000120102	Dsg2
DTL_29371	GTTGAGTGTTCAGGACTGCAGAAGTCATCTTGAGTCTTTCTACGAAAGTA	ENSMUST00000027933	Dtl
DTYMK_30707	GCAGCAGCGTCCAGCAATTGTAACTGAAGGAACAGGATCAGGTCAGGTTT	ENSMUST00000027503	Dtymk
DTYMK_32010	AAGAGCAGGTGCACGGAGTGATCCTCTAGTTCCGTTTTCTTTTCCAAGTA	ENSMUST00000027503	Dtymk
DUSP11_30765	GTAACTCTCAGCAGTCCACTTATTTGGCCTCGCACTCCAGAAGAATCTTC	ENSMUST00000032071	Dusp11
DUSP14_29663	CATAGGGTGTCTGTACCATCTTAACTGAAGACTTCCCAAAGAGCTGGCTC	ENSMUST00000018792	Dusp14
DUSP22_29806	GCACGAACAGTGTGCAAGGCATCTTCCCAGCCAAAGTCGGTGACAGTCAT	ENSMUST00000091672	Dusp22
DUSP22_31944	CCTCCAACATGGGCCTGGCAGTATCGTGCACAGAAAGAATGTGTGTCACC	ENSMUST00000091672	Dusp22
DUSP3_31486	CCCAAGTAGGTGATGCCAGAATCCTCGTAGAAGCTAGCACTGGTGTTGAC	ENSMUST00000107172	Dusp3
DUSP3_31869	GGCTCGGCAGGCTGTAGCAGCCGCTGCCATCCGAGAGCAGGTCGTTGAGA	ENSMUST00000107172	Dusp3
DUSP4_31666	GCGAGATGATGCTTCGGCGCTGCTTGACGAACTCAAAAGCCTCCTCCAGC	ENSMUST00000033930	Dusp4
DUSP6_29846	TCGTAAGCATCGTTCATGGACAGGTTGAGCTTCTGCATGAGGTACGCCAC	ENSMUST00000020118	Dusp6
DUT_29749	ATAGCACCCAGAAGGGACAGCTATCTGAATGTCTGTCTTCACGATGGCTT	ENSMUST00000082122	Dut
DYNLL1_29190	TACCGAAGCCGTGGCGCATCTAAGCTGCCCCACGCCAGCCGCCGCCGCCT	ENSMUST00000009157	Dynll1
DYNLRB1_29341	GTGCTCCGCGCCTTCAAGATGAAGTTGTGCATGAGGTTGGCATACTGTGT	ENSMUST00000109682	Dynlrb1
DYNLT3_30548	TGTACTTGTAAGCTTTCCCCAGTTTGACCAAATGTGTTATAGACTGTTCC	ENSMUST00000033519	Dynlt3
DYRK3_31101	CACTGGAGGCATCGTTTCAGAAACTCTATGAACAAGTAGTCACCACAGCC	ENSMUST00000016670	Dyrk3
DZANK1_32139	GCGCTCCAGCAACTATGGCCAAGCTGTTATGCATTCTAAACCTTGTTATG	ENSMUST00000163701	Dzank1
E2F1_29455	GGAGGAGCCCAGAGAAGTCTTCTTTAACATGCTCCAGGAGTGAGTCAGCA	ENSMUST00000103145	E2f1
E2F2_30940	CAGTTCAGGTCCAGGACTCCATCCTCCGACTCGCTCAGGAGGTAAATGAA	ENSMUST00000061721	E2f2
E2F7_31197	ACAAAGCCCTCGAGCACAGCTCGCTACCTGCAGGGAGTTCACGAACGCAT	ENSMUST00000174857	E2f7
E2F8_30772	GTTTAGTTGGCTCTGGCCCAGGACTGGCGAGTCATGGTTGGTGGCCCTCC	ENSMUST00000058745	E2f8
E430024C06RIK_31006	GCTGATCTGATCCTTCAGATCATTTCGAGTATGAGTTCCTTCTGCCAGAA	E430024C06RIK	E430024c06rik
E430025E21RIK_31445	AGCTGCCAGATGTCTGGAATCAAATCGACAGGAAGAGTTTAGCTCATTGG	ENSMUST00000022976	E430025e21rik
EAPP_29164	GAGTTTAGTTCAGCCTCCATTTCTTTTTCAAATTCATCTTCACTTGATGA	ENSMUST00000163433	Eapp
EAR12_31077	CCCGAGATGAACTATTATGACAGTTTTGACTTATATTGTCACTGCACAAG	EAR12	Ear12
EBF3_31396	TAAGAAATCCAGGCGAGCCAGGGACCCCTAGATTGGCCATGGCGCCACTT	ENSMUST00000168203	Ebf3
EBNA1BP2_30654	TCTTCCCAGGCCTCCTGGAGCCCTTGCCGTGAGCCACCTTGGCTCGGAAG	ENSMUST00000030501	Ebna1bp2
EBP_30366	ATACGACAGGTGGATTACATTCAGTACAAACAAACCTAGCGCCCACCAGA	ENSMUST00000033509	Ebp
ECD_29278	CAGGTTCAGGTCTACATCCACTGCTTCAACAGCGCAATCTCCTGCACCAG	ENSMUST00000022344	Ecd
ECH1_29961	TGCATCAGCAGGCCGCGGAGTTTACTGGAAACTGTCATCGCGGTAGCCAT	ENSMUST00000066264	Ech1
ECI1_29682	TTCTGGATGTCAGCCTCTCGCTGCTTGATCAGGTTGTCTGCGGTGGCCTT	ENSMUST00000024946	Eci1
ECM1_29959	AGGTCAAGGGTCAAGATATCCCGGTCATAGTTGGGATAGGGAGCTAGGTG	ENSMUST00000117507	Ecm1
ECSCR_30747	ATGCTGCCTTTGCTGTTGTTCACGTTGATGTTCCTCATGGAGATGAGTGT	ENSMUST00000097618	Ecscr
ECT2_31257	GCTCCTCTGACGTCATCTGGAAGCTGAGCAGTACATTGGCCTGTTCTGTT	ENSMUST00000108300	Ect2
EDEM1_30286	TCGAAGACCTGGACTGTGGAATCTTTGTCAAATGAAACAGTGTTGATCAC	ENSMUST00000089162	Edem1
EDN1_29602	TAACTGCCTGGTCTGTGGCCTTATTGGGAAGTAAGTCTTTCAAGGAACGC	ENSMUST00000021796	Edn1
EED_30324	TGCTGGCATCATCGCAGACAGCTATGAGGATGCTGCTATCCCTACTGAAA	ENSMUST00000107234	Eed
EEF1A2_29049	TTTCCACAGACTTCACCTCTGTGGTGATGTTGACTGGCGCAAAGGTCACC	ENSMUST00000055990	Eef1a2
EFCAB14_31585	CTCATTCCCTTGAGTTTAAGGTCATTCTGTCTCTGGTATTCCACTACAGT	ENSMUST00000074425	Efcab14
EFCAB14_31816	GTTTTGCACTTTCACTGTGGGATTTATTGTCAAGCTCTGATGGAGGTGAA	ENSMUST00000074425	Efcab14
EGF_30204	GGTTTCCATCCCTGGCAAACCCTTTCAGACACTGACACTCAGCAGTCTCT	ENSMUST00000029653	Egf
EGFR_29812	CTTGCGGATGCCATCTTCTTCCACTTCGTAGTAGTCAGGCCCACAGGCTC	ENSMUST00000020329	Egfr
EGR1_30209	CAGGCTCAGGTCTCCCTGTTGTTGTGGAAACAGATAGTCAGGGATCATGG	ENSMUST00000165033	Egr1
EGR2_29478	GGAGCACTGCTCTTCCGTTCCTTCTGCCGAAGGTGGATCTTGGTGTGGCG	ENSMUST00000105438	Egr2
EI24_29424	GAACCTTAGGAACTAGCTCCGGCCTGCCAGCCCTCGATGGGCCCTGCCGC	ENSMUST00000163192	Ei24
EI24_32165	ACCTTAGGAACTAGCTCCGGCCTGCCAGCCCTCGATGGGCCCTGCCGCCC	ENSMUST00000163192	Ei24
EIF2AK2_30238	CTCTGAGATGTTCCTCCATTCAGCCAAGGTCTTCAGGATTTCAGATGTCT	ENSMUST00000024884	Eif2ak2
EIF2B1_29687	ATAGGTACAGCTTGATGAGCTCATCGCTTACAGCAGATGGCGTCAACACA	ENSMUST00000031334	Eif2b1
EIF2S1_32217	GGATCCTTCGTTGCCACTAACCATAGAGTCTTGGTCCTCCTAATATGGGC	ENSMUST00000071230	Eif2s1
EIF2S3X_31679	TACTACCACCAGCTACACCTCCCTTAAGGTCATCGACTTCACAGCCAGGT	ENSMUST00000113922	Eif2s3x
EIF2S3Y_30799	CGTCTCAGTAGGAAGTAGGAAATTTCTAACTCTGTGAATATCTCAGGTAA	ENSMUST00000091197	Eif2s3y
EIF3C_31671	TCAGTGGTACCTTTCTCCTCCAGGTAGCGCTGCACTCGCTCAATGATGGC	ENSMUST00000032992	Eif3c
EIF3G_31266	GAGCCGAAAGGCCGGAAGAGTTCCTGCAAGTCAGTCTCACGAGTGTCCTC	ENSMUST00000004206	Eif3g
EIF3I_31685	CAGGATGGAAGGCAACGCTGTTGATCGGTCCAAAGTGGCCCTTGACTCTT	ENSMUST00000102593	Eif3i
EIF3K_31464	TAATGCTCTCTTCCTGGCTGCAGATGAAGACCTGCCCTGACTCGTCAGCG	ENSMUST00000066070	Eif3k
EIF4B_30073	GACATAGGTGCTTCCTCCACCAGTTCCTCCATCCTCAGCTAGAAAGTCCG	ENSMUST00000169681	Eif4b
EIF4E_30898	GTAAGGACTGTAACCAGCTTTGAAAACGCTTCGGAATCTAGAAGCAAGCG	ENSMUST00000029803	Eif4e
EIF4E_31961	TGGAGCCGCTCTTTGTAGCTGTGTCTGCGTGGGACTGATAACCAATCACT	ENSMUST00000029803	Eif4e
EIF4EBP1_30076	CAGCTGCTGCCCGCCGACATGTCTCCTGCACGCCGCCCACGACCCTCCAG	ENSMUST00000033880	Eif4ebp1
EIF4G1_29119	CTCCTTCTGCTCATCACACAGGTATTTCTGCAGCAGTCTTGCTCGCACTT	ENSMUST00000044783	Eif4g1
EIF5_30417	GCATCATACATCTCCTTCAGGATGTGTGGGATCTTGGAGATCAGCTGAGC	ENSMUST00000166123	Eif5
ELAC2_29467	AGGCTGCATAAGACTCGGTCTATTTGCTGTCCGTAATGACGGCACAACTG	ENSMUST00000071891	Elac2
ELANE_30700	CGACGTGGCACCAGAGTGCATACGTTCACACGACGGCGGCACATGTTAGT	ENSMUST00000046091	Elane
ELAVL1_30957	CTGCTCAGCGCGCTCTGCTATTGGTCAGTGTCTTTGAAGAAGCGACGCTC	ENSMUST00000098950	Elavl1
ELAVL1_31837	GTCTGATCCACAAGGACCCTGGAGTTGATGATTCGCCCAAACCGAGAAAA	ENSMUST00000098950	Elavl1
ELAVL4_31709	GTTGGTCATGGTGACGAAGCCGAATCCCTTGCACTTGTTGGTGTTGAAGT	ENSMUST00000106598	Elavl4
ELL3_29850	ACACTATGAGGAGCATTCCAGGTCTAATGAGAAAGGATCTGCTTCGAGGG	ENSMUST00000028679	Ell3
ELL3_32016	CTCCATGGTGCCAAAGTCGCGCACATGCAGAACCGGGACCACAGGTGAGG	ENSMUST00000028679	Ell3
ELMOD1_31511	AGACCCATTCCTCGGAAATCTGTTTTCGGATCATCGCCTTGGAAGCCGAT	ENSMUST00000048409	Elmod1
ELOVL2_29604	CCTGAGAGACAGAGCAGGCCTGTTCTTCATGTACTTGTTACCCAGCCATA	ENSMUST00000021793	Elovl2
ELOVL3_30484	GATGCTTCAGTTTGGCAGCCTTCATAGTGTAGTAAGTGTACATGACAGAA	ENSMUST00000043739	Elovl3
ELOVL5_31269	CCAGCTGCCCTTGAGTGATGTACTTTTTCCACCAGAGGTAGGGACGCATG	ENSMUST00000034904	Elovl5
ELOVL6_30026	AAACTCTGGTCACAAACTGACTGCTTCAGGCCTTTGGTCATCAGAATGTA	ENSMUST00000071402	Elovl6
ELOVL6_32029	CAGGAGTACAGGAGCACAGTGATGTGGTGGTACCAGTGCAGGAAGATCAG	ENSMUST00000071402	Elovl6
ELTD1_29724	TCAAAGTGTACCATCTCACAGGCTCTAGAAATGCAAAGCCCTTCTTGACA	ELTD1	Eltd1
EME1_31743	AGTCAACACTGTCTAAGATGAGATCTGGTTGCGCTGTGGTCATTTGAAGG	ENSMUST00000039949	Eme1
EML3_30623	CCTAAGGAGACAAGGTATGAGTCGTCGTGCGTGAACCGGACACTAGTCAC	ENSMUST00000096241	Eml3
EMP3_31231	AAAGCTGGCAGAGGCCGGTAGCGTAGAAGAGCCCTCCGCGCCGCATGGTG	ENSMUST00000164119	Emp3
ENG_29264	AATAGATGTACCAGAGTGCAGCTGTGAGCAGGGCCCCAATCAGGAAGGCA	ENSMUST00000009705	Eng
ENO2_29363	ATGGCTTCTGTGACCGAGCCGATCTGATTGACCTTGAGCAGCAAACAGTT	ENSMUST00000004378	Eno2
ENO3_29459	TTGAAGTCCAGATCATACTTGCCGTTGCGGTAGAATTCAGACGCAGCTAC	ENSMUST00000072841	Eno3
ENPP1_30646	AATCCAGACAGCAGTTCCCAAGGCTGACACAGGCAGCATCACAGCGACAG	ENSMUST00000105520	Enpp1
ENPP3_33338	GGACGATGAAGGGCAGGACATCCAGCCACCCAGGGCAGCTGTCGGGTGTG	ENPP3	Enpp3
ENPP6_31520	ATGCCTCTCATGTCCATGAGTTCGTTGTCATATCCGTGCCATCCTCGCTG	ENSMUST00000039840	Enpp6
ENTPD8_29407	GTCTCCTCACTGAATTTGTAGCCCTCCAGCAGCAATACGAGGATGTACAG	ENSMUST00000114376	Entpd8
EP300_30085	CTAGTGTATGTCTAGTGTACTCTGTGAGAGGTTTGAATTCAAGTCTGCAT	ENSMUST00000068387	Ep300
EPB41L2_29045	TCAGTGAGCTTCTTAATTCTCCAGTCCAGAGAGTCTCTGTCTGACTCTAC	ENSMUST00000053748	Epb41l2
EPHA3_30358	CTTGCAGCCGCGCTGGTGATGATCTTCAGACTGCCTGGATTCCGGATGAG	ENSMUST00000064405	Epha3
EPHB2_30761	ACGTCGAAAGAGGTAAAGCCGGCGTTGGCAAAGCTCTCCTTGTACTGGCC	ENSMUST00000105845	Ephb2
EPHX1_29453	GACCATGACACCCTGGCCCAAGTTTTCCTTGTAGAAGCGCTGGGAGGAGA	ENSMUST00000036928	Ephx1
EPHX2_30975	TGTAGATCTGAGGCTCAGGCTTGATCATCCCAACCTGACAGGACTCTATC	ENSMUST00000070515	Ephx2
EPN2_29895	CAGGCATCTGTTGTCTTTCCAGCATTGGAGGCAGGCTGCTGTGAGGCTGC	ENSMUST00000108713	Epn2
EPRS_29794	CCTCAGCCTCCTTCTCAGCAATTGTCAGTTTCTCTCCAGTATCTCGTCTG	ENSMUST00000046514	Eprs
ERBB2_30377	CCTTCAAAGGTACTTGGTGGAGGACCCTGCTCCGATGAGTTCTGGTCCCA	ENSMUST00000058295	Erbb2
ERBB3_30519	GGCTCCAGCTCTGCATCCTGCAACTCTTTGGTGCTCAGAGCAGATGGCTC	ENSMUST00000082059	Erbb3
EREG_31704	TCTCTCTCATGTCCACCAGGTAGATGCACTGGCCATGCAAGCAGTAGCCG	ENSMUST00000031324	Ereg
ERH_29967	TTACAAACACCTTCCATGCACTCATTCACAGACTCATAGTCAGCATAAGT	ENSMUST00000166931	Erh
ERO1L_29075	CCTTCCAAATGCATTAAACAGTGATACTATTTCTTGTCTGGTTAGCTGGA	ENSMUST00000022378	Ero1l
ERO1LB_30012	CTGAAAGATGCTGAGCAGAAGGGTCTTGGTGTCGGCATCATCTTCCACAT	ENSMUST00000071973	Ero1lb
ESPL1_30731	TGCTCGACAGGTTACTGTGAGGGTTTAGCACATAGAAGGTATTCTGTGGA	ENSMUST00000064924	Espl1
ESR1_30061	CAGGTTCATCATGCGGAACCGACTTGACGTAGCCAGCAACATGTCAAAGA	ENSMUST00000067086	Esr1
ESR1_32092	CATGGAGCGCCAGACGAGACCAATCATCAGAATCTCCAGCCAGGCACACT	ENSMUST00000067086	Esr1
ESR2_30759	TGGTCGATGGAGCGCCACATCAGCCCCACCATCAGCACCTCCATCCAGCA	ENSMUST00000076634	Esr2
ETFB_32121	TCTTCCACACTGATCACAGAGACCTTGGAGGTCAGGTCCACGCCCAGGTC	ENSMUST00000004729	Etfb
ETS1_29924	GCTGCTCCACTCATACAGAACTTCTGGAAGTCCACACCTTTCAGGCTGAA	ENSMUST00000034534	Ets1
ETS1_31857	GAAAGCTTGAATTCCCAGCCATCTCCTGTCCAGCTGATAAAGGACTGACA	ENSMUST00000034534	Ets1
ETV1_31383	CTGAAGTCTTGGTGCATTAGTTCTTGCCAAAAGCAGATGTGATTGTGAGC	ENSMUST00000161980	Etv1
ETV1_31829	ATGCAGCCTTCTGTTCTGCTTGGATGAGCCAGGAAGCCTTCTTGCCTCAT	ENSMUST00000161980	Etv1
EVI2A_29979	ATGCAGGCTTGTCTGTGGCGCTCACCTTGTGACCCACGGCAGGAGTGACA	ENSMUST00000103236	Evi2a
EVL_29224	ATGTTGATCCGGCTGAATCCCTGCTGGCCAGGCTTGATCGGTACCCACTT	ENSMUST00000172409	Evl
EXO1_30245	CTTAGCCGAGTCCTGAGCCCTTCCTTGCAAGGTAGGAAGTCCGCCGCCAA	ENSMUST00000039725	Exo1
EXOG_31394	CGTTCCATCATTCCTAGTATGAGGTAAGGTTAAAGGTCCTGATACTATCC	ENSMUST00000164213	Exog
EXOSC3_29716	GGCCACAGCTGTCAATGCAGACCATCTCTGGTTCCATGTCTTTATTAGCG	ENSMUST00000030003	Exosc3
EXOSC4_29405	TTCCGGTCTCCATGAGGCCTTCGCTTGCGCTCACCTGTGCTGAAGGTGGC	ENSMUST00000059045	Exosc4
EXOSC7_29212	CTCTCAGGATCCAGGCTTCCTTTCCCCACTTTCCTCATGCATGTCACTAC	ENSMUST00000026891	Exosc7
EXT1_29408	CGTAACCTCACAAATCCCTGCATGTCTCTTTATTCCCTTCTGCAGCGGCT	ENSMUST00000077273	Ext1
EZH2_31649	CTTCAGCACCACTCCACTCCACATTCTCAGGAGGTTCAATATTTGGCTTC	ENSMUST00000081721	Ezh2
F11_29528	CTCCACACAGGTGTCCCTGGCTGATGTGCAGAGTCACCTGCCATGGCCAC	ENSMUST00000034064	F11
F12_29761	TGGCGTCTCCGTGCACGTTAGAGTTGGAGCAGCGATCCAGGGCGATAAAG	ENSMUST00000170921	F12
F13A1_30909	TTGATGCGTGCCGTGACGAAGAAGTGCAAGAAGCCCTGTTCTAGAAGGTG	ENSMUST00000037491	F13a1
F2_29992	AAGGTCTTCTCATTGAAGAAGGTGTGGAACTCCGCATCGGTGGTGCGTCC	ENSMUST00000028681	F2
F2R_29379	AGCTGGCCGGTGCTGTTGCAACTGTTGGGATCAGAGCTTTCTTTGCAGCA	ENSMUST00000059193	F2r
F3_31194	CTCCCAGGAAACTCTTCCATTGCTCGGTGCACACTGTACTGCTTCCTGGG	ENSMUST00000029771	F3
F5_29505	CACTGTACTGGATGCTGTAGCTCTTCACGTACATCTCAGAGGACAGAGAC	ENSMUST00000086040	F5
FABP1_29382	GGTACTTGCCGGAGAAGTTCATGGTGGCAACGAGGCTTCCTTTCCACAGC	ENSMUST00000067492	Fabp1
FABP2_29125	GAAACCTCTCGGACAGCAATCAGCTCCTTTCCATTGTCTACACGTGTGAA	ENSMUST00000023820	Fabp2
FABP4_29289	TTCACTGGAGACAAGCTTCCAGGTTCCCACAAAGGCATCACACATTTTGT	ENSMUST00000029041	Fabp4
FABP5_29285	TTCTGCCATCAGCTGTCGTTTCATCAAACTTCTCTCCCAGGTTACAAGAG	ENSMUST00000029046	Fabp5
FABP7_29740	CCATCTTGCCATCCTTAATTTCTCTGGTACAATTTGTTTCTTTGCCATCC	ENSMUST00000020024	Fabp7
FAH_30189	ATGGTTCCAGAAGCCAAGAGGTCCCCAGGTCTCAGGTTGCATCCATTAAC	ENSMUST00000032865	Fah
FAIM_30308	CCGCTTGCCTGATGTGGTCCCATGTTCAAATTCAATCTTGTGGACTCCGT	ENSMUST00000112911	Faim
FAM155A_31348	GGTCGTAGTCCTGGTAAGCCTCGATGCACTGTCTACACGTGGTCATCTCA	ENSMUST00000208933	Fam155a
FAM20B_30491	CAAACTGGTCAGTACACTGCTTGATGGTGGCCAAGACATTCAGAAGCCGC	ENSMUST00000122424	Fam20b
FAM57A_31034	GGTGGTGCGTGTGAGTTTCTGGCTTTTGGTTCGGCACCGTTCGCAGCAGT	ENSMUST00000094014	Fam57a
FAM63A_31044	CCAGCCAGCCATGGTATAGAGGTATTCCCAGCAAGTCAAAGATGCTGCAT	ENSMUST00000168223	Fam63a
FAM64A_30603	GGTCCTTGGTCCTAGTTTCCAGACTCAGAACTATCTAGCATCTTCTGGTA	ENSMUST00000021164	Fam64a
FAM69A_29296	CTACAGTCTGTACCGTAGACACAGTCCAGGTCAGACTCACAGTGGCGGTC	ENSMUST00000031198	Fam69a
FANCD2_32130	GAGAGTACCCAACCAGAAAGCCTCTCTACAGTTGTTGAGGACAAGCATGG	ENSMUST00000036340	Fancd2
FAP_29883	AGCTGAAGTCAGGACATGAGTTGCTTCCCGCTCCCCTCCTCCCTTTCCCA	ENSMUST00000102732	Fap
FAP_32073	ACTTGCTGTGTAATATTGGCACCTTTCTTTCCTTAGATGGCAAGTAACAC	ENSMUST00000102732	Fap
FAS_30425	CAGCACAGGAGCAGCTGGACTTTCTGCTCAGCTGTGTCTTGGATGCTGTC	ENSMUST00000025691	Fas
FAS_31820	TTTCACGAACCCGCCTCCTCAGCTTTAAACTCTCGGAGATGCTATTAGTA	ENSMUST00000025691	Fas
FASL_31241	GTAGTGCAGTAGTTCAACCTCTTCTCCTCCATTAGCACCAGATCCTCAGG	ENSMUST00000000834	Fasl
FASN_31200	TCTGACACTTTCACTCCCAACGGCTTCACAGCCTCATCGGAGCGCAGGAT	ENSMUST00000055655	Fasn
FASTKD5_30823	TAATTCTACCACACGGTACCCAATTTGAACTAGCTGCCTCCTCTTCATAT	ENSMUST00000110262	Fastkd5
FAT1_29645	TCTGTTCAGGATGGCGGTATTCCCTCCTTTGGTTCTTATCCTTAGAAAGC	ENSMUST00000191428	Fat1
FBL_29301	CAAACACAGCCTCTGCTGACGCAGTGGAGTCAATGCAGTTGGCCTTAATG	ENSMUST00000042405	Fbl
FBN1_30622	ATTCACAGGTGAAGCTTCCTGGAGTGTTCTGGCAAACACCCTTGGACCCA	ENSMUST00000028633	Fbn1
FBXL12_32056	TAAGAGAAGATCTCCAAGAGCACCAAGTCTGGGAGGTCAAACAGAGTCGC	ENSMUST00000148631	Fbxl12
FBXL12_32119	GCCCAGCCCTTGCACCTCAAGCACTCTGAGCTTCGGCATGGTGAGGCAGG	ENSMUST00000148631	Fbxl12
FBXO11_29575	CGCGACACTCGCCTGGGTCTCCGGTTGGCGGCTCGGACGGAGTTCATTTG	ENSMUST00000005504	Fbxo11
FBXO21_30702	AGCACCTTCTTCACATTCACCACGCCGTAGAGTGCTGCCGTCACGTGCTG	ENSMUST00000202447	Fbxo21
FBXO22_29750	CCAGGTGAACGAGAGCCATGATGGTTGTGTAGCTATGGAACAGGTCCTCT	ENSMUST00000034859	Fbxo22
FBXO5_29404	TTACTAAGTCCATGCCGCTGAGCTTAGTCAAAATGTTAGCCAACAGGTGC	ENSMUST00000019907	Fbxo5
FBXO7_30569	CCTGGAGTGAGGAATGCTCTGTATCTGTAGATGAAGGTAAGTTAGGTGCC	ENSMUST00000130320	Fbxo7
FBXW18_30770	TTAGTCGCCAGAGCATCACTGCTATTACAGTCCCACAGTTTGATAGTTGA	ENSMUST00000098359	Fbxw18
FCER1A_31121	TGTCAGATTCATATTTCACCTGCCTAAGATAGCCCTTGCAGTGGTAGGTG	ENSMUST00000049706	Fcer1a
FCER1G_31620	TGGTGATCGCGCTGCGCTGACAGAACTGCGCAGCTGTGCCCACGAACAGT	ENSMUST00000079957	Fcer1g
FCER2A_30020	CGTCCGACCATACAAACTCTCCCTCCATATTGAGATCCTGGAGGCCAATC	ENSMUST00000005678	Fcer2a
FCGR3_30920	TTGTAGTGATGATACCTCACGGATTTTTCATTATGGAAGAACGAGATCCT	ENSMUST00000164044	Fcgr3
FCHO1_29753	TTCACCAGGGACATGCGGTAGCCACCACCTAGCAGCTCCAGGTCCAGGCC	ENSMUST00000146100	Fcho1
FDFT1_29306	CTCTGGACATAGTCTTCTGTGACCTGGGACAGGGTGCTCAGGTACTGCCA	ENSMUST00000054963	Fdft1
FEN1_29564	ATGCCCATGAGGCTCAGCAGGTGTTTGCACTCATCATTGTGTTGCTTGGT	ENSMUST00000156291	Fen1
FEZ2_29926	CTGCAGTGAAGAGAGGCTCTTCGTTGACACAGGAGACAATGATCGAATGC	ENSMUST00000112487	Fez2
FGA_30144	ACCTCTGCACAGTTCTCTTCCCATTGGTCGGCATCTCTGTCAAAGGTACT	ENSMUST00000166581	Fga
FGA_31931	GTGCCAGAAGAGGTGACTTTCTCCTTTCCAATCAGGAGCTCTTTATCTCC	ENSMUST00000166581	Fga
FGB_31627	TGTCACAGTATACTCTGTACGGCTTGATGGAGGTGTCAGGCTGGATGAGA	ENSMUST00000048246	Fgb
FGF1_31461	AGCCCTTCGGTGTCCATGGCCAAGTACTGGCCGGTCTCCGTACCCTTTAT	ENSMUST00000040647	Fgf1
FGF1_31905	CCGCGCTTACAGCTCCCGTTCTTCTTGAGGCCCACAAACCAGTTCTTCTC	ENSMUST00000040647	Fgf1
FGF12_30271	CCTTGGTCCCATCAATGGTACCATCTGGATGCATCTGCAGGAAATATCCC	ENSMUST00000100024	Fgf12
FGF2_31912	TCAGTGACAGTGTCAAAAGTGAGTCAGCTCTTAGCAGACATTGGAAGAAA	ENSMUST00000138563	Fgf2
FGF2_32229	CTAGGCAGAGCTTTCTCCAGGAGACTGCGGTGACGCAGCTCCTAAAGTTT	ENSMUST00000138563	Fgf2
FGF21_29090	CATCTGGCTGTTGGCAAAGAAACCTAGAGGCTTTGACACCCAGGATTTGA	ENSMUST00000033099	Fgf21
FGF4_29902	TAGGAAGGAAGTGGGTTACCTTCATGGTAGGCGACACTCGGTTCCCCTTC	ENSMUST00000060336	Fgf4
FGFR2_29411	AGAGTCAGAATTCGATCCAAGTCTTCGACCAACTGCTTGAATGTGGGTCT	ENSMUST00000124096	Fgfr2
FGFR4_30736	TTATAGTAGTCAATGTGGTGGACACCACGTGCCAGCCCAAAGTCAGCGAT	ENSMUST00000005452	Fgfr4
FGG_31289	ATCCACCAGCCGGATCCATCCTGTTCCGCACAGTTGCCTTCAAACTTATC	ENSMUST00000194175	Fgg
FHL2_29099	CAGGCAGTATGGAAACTCATCCCGTGCTGTGAAGCGTTGCCCAGATAGCT	ENSMUST00000008280	Fhl2
FIS1_29489	GTTCTCATGACAGCCTTCTTTGGTTTTTCTCCGTAGCGGTCTATCAACCG	ENSMUST00000111094	Fis1
FIS1_31978	GCTTCGAACCAGGCACCAGGCATATTCAAATTGCGTGCTCTTGGACACAG	ENSMUST00000111094	Fis1
FKBP14_31172	ATATCTTCCACCAAAGCATCGTGATGGCTTTCATTCACCACGGCACCGTG	ENSMUST00000117375	Fkbp14
FKBP1A_31753	TTCGTCCCTCTCGTGGCTCCTGCGCACGCGCACCGCACCGCACGGCACGC	ENSMUST00000044011	Fkbp1a
FKBP1A_31755	CGGCTTCGTCCCTCTCGTGGCTCCTGCGCACGCGCACCGCACCGCACGGC	ENSMUST00000044011	Fkbp1a
FKBP4_29507	AGGCCAGTCGGAGTGCATGGACCTTTTGCATTTCCTCACCGGAGAAGCTA	ENSMUST00000032508	Fkbp4
FKBP5_29670	CCTTCTTCCATGGCCTGACTCTCGTGTTGTTTGCCAGCGGCTCCTTCTAC	ENSMUST00000114792	Fkbp5
FLNA_30270	GCTTCGCCGATGGGACGGCCCTTTAATTAAAGCAGTAGGCACCTCCGAGC	ENSMUST00000114299	Flna
FMO1_31698	CTGACTCTAAGTAGCTGTAATTGCTCATTCCAGTGGCCCTGACACAATTA	ENSMUST00000046049	Fmo1
FMO3_31399	GAGAGCAAGACTTCTGAACTTTACTGACGACACGCGTCTTCATAGGCTTC	ENSMUST00000028010	Fmo3
FMO5_31731	TCCGAGAAGAGAGTAGCAGGTCAATAGGATATCCATGCTTGCCTACACGG	ENSMUST00000107050	Fmo5
FN1_31533	CGTGCACAGCATTTGCTTGTTTCCTTGCGACTTCAGCCACTGCATTCCCA	ENSMUST00000186940	Fn1
FNDC4_30757	TCCCCGGTGCAGAGGACAGTGCGGCGGCCAAAGCTGGTCCCCTGCAGCGG	ENSMUST00000041266	Fndc4
FOS_31714	ATTGCTGTGCAGAGGCTCCCAGTCTGCTGCATAGAAGGAACCGGACAGGT	ENSMUST00000021674	Fos
FOSL1_30439	GCCTGCAGGAAGTCTGTCAGCTCCTTTCTTCGGTTTCTGCACTTAGCAGC	ENSMUST00000025850	Fosl1
FOXA1_30681	AGAGTACTGCAGCGCCTGCTCGTATGCCTTGAAGTCCAGCTTGTGCTGTT	ENSMUST00000044380	Foxa1
FOXC1_30240	TTTGCTACAGTCATAGACGAAAGCCCCCGACGTGCGGTACAGAGACTGAC	ENSMUST00000062292	Foxc1
FOXC2_31256	TCAGAGTGATCTTCTTCTCTGGCGCGTTCTGGATCGCCATGGTGATGAGC	ENSMUST00000054691	Foxc2
FOXG1_29969	GACTCTGCCTGATGGCCATCATGATGAGCGCGTTGTAGCTGAACGGCGGC	ENSMUST00000021333	Foxg1
FOXJ3_30348	TTGTGCTGTTGGACTTCTTCCTGGTCCAGTGTTGTATTTGGGTCAAGGAG	ENSMUST00000138845	Foxj3
FOXO3_31805	#N/A	#N/A	Foxo3
FOXO4_29577	ATGTTATCCATGTCGCACTCCAGGTTCTCCATATACATATCAAGATCCAG	ENSMUST00000062000	Foxo4
FPGS_31746	TCAGCCAGGCCGTTCCAATGCTGCTGGTGTTGGAGGCAGCGGAGCAGCAC	ENSMUST00000028148	Fpgs
FPR1_30738	GAACCCAATGATGAACCTGATGATTCCTCTGACAGTGAGCATGGTGACGG	ENSMUST00000061516	Fpr1
FPR2_31644	AATACACATCTCCTCCAGGAATTCTAACAGTAGTCAAGAAAATAAAAATG	ENSMUST00000064068	Fpr2
FRS2_31536	TCCCTGCGCTTCGAATAGTCTATTTTGTGAGCACTTGCCGGCACTGTTAC	ENSMUST00000020381	Frs2
FSCN1_31259	AAGCTACTAGCGGATGCGTTCACCTTGAACCCGAACGCCTCGGCTGTCAG	ENSMUST00000198017	Fscn1
FSD1_31656	CTTGATATCTTGGACCTTCCCGCCCATGGCGTCCCACTCGGCAGAGAGAT	ENSMUST00000011733	Fsd1
FSHB_30801	GTGATGTTGGTCAATTCACAGCTATGGCAGCAGATTGCTCTCCAGCACCA	ENSMUST00000028533	Fshb
FST_32223	GATACACTTTCCCTCATAGGCTAATCCAATGGATCTGCCCAGCAAGCAGG	ENSMUST00000022287	Fst
FSTL5_29498	ATTTATTAAGGCGACCATCCAGGATGAAGAGAGAATCTTTGGAAGGTGTC	ENSMUST00000038364	Fstl5
FURIN_30709	GTCCATGGTGTACACTTTCACTCCCCGGAAGCTGAAGCCCGAACACCGAT	ENSMUST00000122232	Furin
FUT1_31509	GAAGTTTGCAAGGTAGACCGTGTCTCCACCAGCTAAGTAGGCAGCCCAGA	ENSMUST00000008605	Fut1
FUT9_31255	CACCCTTGGATATTGAACATTGCTTGGCAGGATGTAAGGTCAAAGGTCTG	ENSMUST00000084770	Fut9
FYN_30452	CCTTTGGTGACCAGCTCTGTGAGTAAGATTCCAAAAGACCATACGTCAGA	ENSMUST00000063091	Fyn
FZD1_30078	TCGTGTAGAACTTCCTCCAGGAATTCAGTGTCTTGCCGGACCAGATCCAG	ENSMUST00000054294	Fzd1
FZD2_29641	TGGCTAGGCTCTTGCAGTGCTGGCTTACCCAGGAGCGCTCCCAGTGCTCG	ENSMUST00000057893	Fzd2
FZD7_29683	CGAAGCCCCGCAATGCATCCACACTAGACAGGCCCACGTAGCACACTCCA	ENSMUST00000114246	Fzd7
G0S2_29985	AGAGGCAGCACTTGCTGGAGAAGGTCAGGCGTCCTTGCGTCAGACTGGCT	ENSMUST00000009777	G0s2
G3BP1_31390	GTCAACCTCATGTGGCAGGTTCCCAATGAAGAGCTGGTGACTGTCAGGGT	ENSMUST00000018727	G3bp1
G6PC_29672	TTAGTAGCAGGTAGAATCCAAGCGCGAAACCAAACAAGAAGATGGTGATG	ENSMUST00000019469	G6pc
G6PDX_31137	ATGCCAGGCTTCTTGGTCATCATCTTGGTGTATACTGCCTCATTGGGCTG	ENSMUST00000004327	G6pdx
GAA_29996	TGGATGTGCAGAGGCCCTGGCTTGTAACCTTCCTGGTGGTGAGGTCGGTA	ENSMUST00000106258	Gaa
GABARAP_30872	CTAACATACGCCACTAGCTCAGCTTGCTAGCGCAACCCGTAGCCTGGTCC	ENSMUST00000018711	Gabarap
GABARAP_31991	GCGCTTCTCGAACGGATGCTCCTCTTTGTACACGAACTTCATTCTCCCGA	ENSMUST00000018711	Gabarap
GABPB1_30051	TTGGTCTGGATGCGTGTCATGGCCTCCAGCTTCTGCCTGTAGGCCTCTGC	ENSMUST00000110425	Gabpb1
GABPB1_32079	AGAAGCTTCAGCTAAGGCAGCTAACGTAGCTAATACTGACGTAGAGGAGT	ENSMUST00000110425	Gabpb1
GABRA1_29358	GCTGAGGCTCTCTGTTTAAATACGTGGCCCAATAGACTAAGTTAAAGATT	ENSMUST00000205546	Gabra1
GABRA4_30688	AAGCTTGCAAGTGCTGCTCACCGGTGAACTTGGGAGCTCCTGCCACTCGA	ENSMUST00000031121	Gabra4
GABRA4_31983	CTGGGCAGGGTGCGAGGAGAGGGCAGAGTGGCTCCCGCGGCGTGCGCACA	ENSMUST00000031121	Gabra4
GABRA5_30787	TACTGGTTGAGCCTGGAGCCATCTTCTGCCACCACCACAGACTTGGTGGA	ENSMUST00000206382	Gabra5
GABRB1_30689	CAATCGCTTTGACGTAAGGGATCTTCGGCAAAGTCTCCCTGAGGTGAGTG	ENSMUST00000031122	Gabrb1
GABRG2_29185	TGATACAGCCTCCATGATCTTGTGTCACCCACTTCAACAGAACTGCGCTT	ENSMUST00000070725	Gabrg2
GAD1_30856	ACCTTGGTGGAGCGATCAAATGTCTTGCGGACATAGTTGAGGAGTATGTC	ENSMUST00000148210	Gad1
GAD1-PS_31588	CAGAATGGCAGAGCACTGGAGCGGTACGCCCATTATCTTGTGAGGGTTCC	ENSMUST00000167243	Gad1-ps
GADD45A_29109	CTGACCCGCAGGATGTTGATGTCGTTCTCGCAGCAGAACGCACGGATGAG	ENSMUST00000043098	Gadd45a
GADD45A_31917	CAGCCTCGTACACGCCGACCGTAATGGTGCGCTGACTCCGAGCCTTGCTG	ENSMUST00000043098	Gadd45a
GADD45B_31606	ACGACTGGATCAGGGTGAAGTGAATCTGCAGAGCGATATCATCCTCCTCT	ENSMUST00000015456	Gadd45b
GADD45G_30550	AGCAAGTTATCCAAAAGAGTGCGGAGGGAACCCGAGCGCAGGTAAAGATT	ENSMUST00000021903	Gadd45g
GALE_29920	CAACCACATTGCTCCTTCAGCTTCTTCAAGGCTGCTATATGGCCCTTCGC	ENSMUST00000102541	Gale
GALNT1_30081	CAAGCCGCCTGTTATTCTTATTGATAATCTGCCCTGTCCCTCCTGGAAAT	ENSMUST00000000430	Galnt1
GAP43_29676	CACCCTTCTTCTCGCCTTTGAGCTTTTTCCTTGTTATGTGTCCACGGAAG	ENSMUST00000102817	Gap43
GAPDH_31215	GCCATGAGGTCCACCACCCTGTTGCTGTAGCCGTATTCATTGTCATACCA	ENSMUST00000117757	Gapdh
GARS_31586	TCTCATCAGTTCTTGCATAGCGCCTTCCAATAGACCCAGAGGAGTCATCG	ENSMUST00000003572	Gars
GART_29948	CCCAGAGAGGATCCTCATGAACCCTGCAAGACAGACGATGTCTACAGAGA	ENSMUST00000023684	Gart
GART_31895	CCTCCGCTTGGCTCTTGGCCACAATCACTCCCTTCCCTGCTGCAAGGCCA	ENSMUST00000023684	Gart
GAS5_29667	CGAAAGGCTGAGATGGCGGCTGAGTCGAGTATATAAGGTCTTCGTGACGT	ENSMUST00000159706	Gas5
GATA2_30710	CCTGGATGGAAGAGACTGCTGCCATAGTCATGAGCTGCGGCGGGCACATA	ENSMUST00000170089	Gata2
GATA3_31451	TGGTCAGCATGTGGCTGGAGTGGCTGAAGGGAGAGATGTGGCTCAGGGAT	ENSMUST00000102976	Gata3
GATA6_30011	CTCACCCTCAGCATTTCTACGCCATAAGGTAGTGGTTGTGGTGTGACAGT	ENSMUST00000047762	Gata6
GBP10_29885	AGCTCCAGCATGAAATCCCGAACAATCCAGACAAAGTCTGGAAAGAAACT	ENSMUST00000065588	Gbp10
GBP2_30699	CCCGAAGTTTAGCAGCTATGATGTTTTCCTGTTCTGCTAATAACTGTTTC	ENSMUST00000165774	Gbp2
GBP3_32192	CTCTCTCCATCTGTAAGAGCTTTGTCTGACTGCAAGATAGAGTCCTCCAT	ENSMUST00000029935	Gbp3
GBP6_29203	CTGCAATGGCCTTCTCCCCAGCAGTGAGCGCTGTATCTGCCTGCAAGATG	ENSMUST00000050011	Gbp6
GCLC_31268	CTGCAATTTGGTTGCACTTCCAAATGAGGCTATAGTTGATTTCATCAGTT	ENSMUST00000034905	Gclc
GCLM_29258	CTCCAAGGAAAGATTAACTCCATCTTCAATCGGAGGCGAAGCCATGATCA	ENSMUST00000178826	Gclm
GDF15_31744	GACTGAGTATCCGGACAGCTGGGTCAGGACTTGGTTCTGAGTTCGAGTCC	ENSMUST00000110103	Gdf15
GDF7_29562	AAGTCGCAAACGCCCTCGCAGTGGTATGCCTCGTAGTCTAATGGCGCGAT	ENSMUST00000037313	Gdf7
GDF9_32237	TGAAGGGTCCAGCTTCTCATAGATTATATTCTGGACCATGGTGTGCACAG	ENSMUST00000018382	Gdf9
GDNF_29292	TCTCGGCCGATTCACAGGAACCGCTGCAATATCGAAAGATCAGTTCCTCC	ENSMUST00000022744	Gdnf
GDPD3_29608	AGATGGAGAGCATGACGTAACTGCCCAGGGTGGGCAGAACAAAGTACAGG	ENSMUST00000032944	Gdpd3
GDPD5_29752	GTGCTGTTGGCATTAGCATAGGTGTCGTAACTGCTGTCTGAACATACGGA	ENSMUST00000037528	Gdpd5
GEMIN6_29553	CAGCTTCTCGCGTACTCTGTGGTCCCCTTCACTTATGGTTTCCACAGTCT	ENSMUST00000069486	Gemin6
GFOD1_31265	ACATCCTGGTGCAGGAGCACCTCGTCGATGCGGCTGGTGTAGAAAGGAAC	ENSMUST00000055341	Gfod1
GFPT1_30928	TCATATCCTCTGTATTCCAGTCTCTGAAGGCCTTTGATTAGTGTCTCCAA	ENSMUST00000113655	Gfpt1
GGH_29818	CATGAGAAATGCCGCCCAGATTCTTCCACTCAAATGCTGCTTTCTCAGGA	ENSMUST00000098242	Ggh
GGT7_30448	GGTCCTTCACACCGATGATGAAGGTGTTGGTTCTCCGACTGCCGTGGACC	ENSMUST00000029131	Ggt7
GHR_29091	GACTTCGCTGAACTCGCTGTACTTTTCAAAGCTCCGTTGTCTGGATCTCA	ENSMUST00000110698	Ghr
GIMAP3_31235	GGTGAGTTCCTGAGGATCTTTCCATTCAAGATCTATAGCCACTGTGGAGC	ENSMUST00000204036	Gimap3
GIMAP3_32085	AGTACCTCCTCCCACACTCCTGAACCAGGCTGCGCAGGCTGCGGTTGTCA	ENSMUST00000204036	Gimap3
GIMAP4_30112	ACAATTGCATCTTCTGCTCTTCCTTTTCAGCGCCTGAGGCTCTGTTGTTG	ENSMUST00000121957	Gimap4
GIMAP4_31881	GTTCCCTGTTGAACTCTTTCCTGCTCCAGTTTTTCCAAGTAAGACAATTC	ENSMUST00000121957	Gimap4
GIMAP6_32097	CATGAGCCGATGGACCCGAGTGTTTTTCTGTAAAGCCAATCCATCTTTCA	ENSMUST00000053661	Gimap6
GIMAP6_32133	ATGCAACATCCAGAACATCCAGGCTCTTATTGTTGTTCTCTTGAATATAT	ENSMUST00000053661	Gimap6
GIMAP8_30421	GCTTGTTGCTGTGGCACTGCACCATCTTCTCGATTTGGCTCAGTAGTTTG	ENSMUST00000203083	Gimap8
GINS2_29342	AGAGACGTTGCTCTCTTCGCAGCCTCCAAGTCACAGCTAGTACAAACTCG	ENSMUST00000034278	Gins2
GJA1_30852	TGCTCGCTGGCTTGCTTGTTGTAATTGCGGCAGGAGGAATTGTTTCTGTC	ENSMUST00000068581	Gja1
GJB6_30133	TGGTTTCTCTGCGCCTGTGTTCTTTTGGATCTCCTAAAGCACAATTTAAG	ENSMUST00000039380	Gjb6
GJC1_31333	ACCCGGATCATCAAGTTCCCTCCTTTTACTGTTTAGTGAGTCTCGAATTG	ENSMUST00000107075	Gjc1
GK2_29999	GCCGTCGTTTCAGGCATGACAGACTTAACTACCGGAATGTGCAGAATATC	ENSMUST00000059657	Gk2
GLB1_31036	GTTCCTTGGCACGAACAAGGTCTTTTGTGGGCCCATTGTGGGCCAGTATC	ENSMUST00000063042	Glb1
GLI1_29141	GCCTCATCTAGGATAGCCACAAAGTCCAGCTGAGTGTTGTCCAGGTCAAG	ENSMUST00000026474	Gli1
GLI2_29469	GAGTCCACGGTGCTAGACACCTGGTTGACTCCCGGTGAAGGCAAAGGCTC	ENSMUST00000062483	Gli2
GLOD4_29298	AAGAAATGCACTGTCTGGAAGCGGTTCTTCACTTTGAAAACGAAGTGCAG	ENSMUST00000169701	Glod4
GLOD4_31927	TCAGCGTAGCCCAGCAAAGCTCGTTGCTTTTCCTCATCTTGCTCATAAAT	ENSMUST00000169701	Glod4
GLRB_30155	CAATGAGCCACACATCCAGCGCCTTCACATAAGACACTTTAGGAAGCTCG	ENSMUST00000194085	Glrb
GLRB_31956	GATGGGCACAAGTACTGCTTCTTTTTCCCCTTCCCTTTCTTGGAAGACTT	ENSMUST00000194085	Glrb
GLRX_31414	ACAGAGGGAGCTGCATGCACCATCTGCTCTGCCGCCTAAGTTAACGTGGC	ENSMUST00000022082	Glrx
GLT28D2_31316	CAGGAAGCATGCTGCAGGTACAGTAGAAGAGATGGCCTTCTTTGTGCAAC	ENSMUST00000033643	Glt28d2
GLUL_29159	ATACTGGCACCGCGGTTGGCAACACCGGCAGAAAAGTCGTTGATGTTGGA	ENSMUST00000086199	Glul
GLYAT_30945	TGGACAACAAAGGAGACAAGACCTTGGAGCCGGTACTCAGGCATAGTGCC	ENSMUST00000044976	Glyat
GM10406_30397	TTTTCTTCCCCACAGGACACTTATAGCCAGCCTGCTCCACCAGCAGCCTT	ENSMUST00000170738	Gm10406
GM10439_31726	CTGGTTGTTATCAGATCTCCATGATTGGTTGTTATGAGCTCTCATTGCAT	ENSMUST00000101181	Gm10439
GM10452_31759	TAGTGTGTCTGTGGTGTGTATGTGTGTGTGTGTATGTTGTGTGTATGTGT	GM10452	Gm10452
GM13084_31387	TCAATTTGTTCTTTGTCCCATAGCCAGGACTATTCTCAACTGGCTTCTCC	ENSMUST00000105769	Gm13084
GM13238_30264	GCCTGAACTCTTAATCCACTGTAATCAACCTCTATGTGCTCAAATTCTTT	GM13238	Gm13238
GM13242_29652	TTTGTCACACTCACTGCATTGGTACGGTTTCTCTCCTGCATGAATTCTAT	ENSMUST00000105738	Gm13242
GM13306_31243	CCTGCGCCACATTCGCAGCCAAGGAAAAAAGTAGAAGCAGCCCCAGTAGA	ENSMUST00000108018	Gm13306
GM14085_30207	ACTCCCACTATCTCAATCACCAGAAGGCAGTCTGTCCACTGTACAGCCAT	ENSMUST00000110521	Gm14085
GM14446_32177	AGGACATGATCTTCCTTGCGTCTTTTAGCCAGTTTCTCCAAAGCCTTGAG	GM14446	Gm14446
GM15080_29911	CCATGTTGAAGCCTAACTGCATGATTTTGATGTGGTCTACCTGAGTAGTC	ENSMUST00000112804	Gm15080
GM15085_30675	AGATCTCTCCATGACTGGTTGTTATCAGATCTCCATGACTGGTTGTTATG	ENSMUST00000178169	Gm15085
GM15107_29909	CAGATGTTATGAGCTCTCCATGACTGATCATTATGACCTCTCTGTGACTG	ENSMUST00000112796	Gm15107
GM15128_29732	GCTCTCCATGACTGATCATTATGGCCTCTCTGTGACTGGTTGTCATGACC	ENSMUST00000112814	Gm15128
GM17296_31214	AACGATCAGTCTGCTAATGGACTTTCCGAGCTTGGCAGCCCGATCCTGAA	ENSMUST00000170518	Gm17296
GM19420_29982	TCTGTGCCTAGTAGGCCAAGAGATTCCCATTCTGAATACTGCAGAAAGTT	GM19420	Gm19420
GM20777_31529	CCACTGGCCTTCTGTATTGTGTTAACTGACCCAGCCTCAGGATTATTTGG	ENSMUST00000187434	Gm20777
GM20777_32259	TTCATGAGGGATGACATGCTAAGTCTCTTCAAAGGTATTTTCTTCTACAT	ENSMUST00000187434	Gm20777
GM2083_29047	GAGGTATCCTAGGTAACATGTGGATATACTGGTATTGGACTTCTCAGTGA	GM2083	Gm2083
GM20831_29537	CCAGCCTCAGGATTATTTGGTGATTATTTGCCACTGCAACTCCGTCCTCA	ENSMUST00000177639	Gm20831
GM21949_31118	TGCTGACTCTCAGCGTGTCTGCAAAATCAAAGATACAAATCACTCAGCAC	GM21949	Gm21949
GM2382_30370	CTCCCTCACCAGGCTGATGAATATTCCAAGATGTCTTGGGAAGTAAAGCA	GM2382	Gm2382
GM3002_32169	TGAGAAAGGATTCCCTCTTCCTTCTCTGTTGGTCTGGTCACTCCTTCATC	ENSMUST00000170480	Gm3002
GM3150_31169	ACCTTGTGAGACAGAAATCCATGAAATTCAGAGAGGTAGATGTTAAGGAC	GM3150	Gm3150
GM3258_31105	GTGCAGTCATAAACCATCTCTCTGTTGCCCTTCATTTGTAGGTATGCATC	GM3258	Gm3258
GM3515_30500	CCAACATTCAAAGCTTCCAATCCATGTTTCACCGGCAAGGCAGAGCCAGG	GM3515	Gm3515
GM3601_31678	CTGGCAGCTAACTCCTGTCCAGGATGACGAGGAAGCCCTCATTGCACCTT	GM3601	Gm3601
GM364_32249	TCCAAAGTACAGTGCAAAGAGGCTTGCCAGTGTACAAAAGGAGATAGCAG	ENSMUST00000114725	Gm364
GM3776_29765	AGGCTGGCATCAAACTCTTCAACATAGAGGAGAACTTCCAGTAGGTGGAT	GM3776	Gm3776
GM5128_29928	TTGGTGACTTCAGTAAGAGGAGACTCATCAACTGCAAGGTGATCAACACA	ENSMUST00000113173	Gm5128
GM5589_32198	CCGCAACCAGCTCCTCCTTCTTGTTCCATTCCACCGCATTCATGATGCAG	GM5589	Gm5589
GM5620_31287	GCTTGGCATACATCAGATCAAACTTGTGATCTAGGCGAGCCCAGGCCTCA	GM5620	Gm5620
GM5771_32251	AGTTGGCAGCAATTGTGTCCTGAATCCAATCCACATAGTTGCAGACCTTG	ENSMUST00000049079	Gm5771
GM5806_30036	TACACAGCACCAGTTTAAACAGGATTATCAAACACCTGCAGCAGCGCGTG	GM5806	Gm5806
GM6453_30766	TGCCGTGCAACATCCAGGATGTTCTTGGCTCCTTTGTTGAGCAGCAAGCT	GM6453	Gm6453
GM6756_31198	CCTCTTTCACCAGTAGCTTAGCGTTCACCAAGTTCACGTCTGCCTGCTTA	GM6756	Gm6756
GM6788_31017	CTGGTCCTGACAGAACACAATGTCTGACCAAGTTCAGCTTACAAAGCTGT	GM6788	Gm6788
GM8203_30921	ACACTGGACAGCTGTTAGGAATATTTAGAGTCCTGAGATAATAAGGAATC	GM8203	Gm8203
GM8221_31772	TCATCTTCTATATCTCTATCTTCATCTTCTGTATCACTATCTTCATCTTC	GM8221	Gm8221
GM8801_31618	TACCCGGCTAAAGTTAATGAAAGCTGGTCTCACGGAGTCTCTAATACCGC	GM8801	Gm8801
GM9790_30827	CCCACAACCAGTTTCTAAGTGTGATTTTAATAAACACTGCCTTTCTGCAG	GM9790	Gm9790
GMNN_32260	TCGTCTCAGCTCGCCCAGCTTTGCCTTGCAGTCGGGCCGAGACTCGGGTC	ENSMUST00000006898	Gmnn
GNA11_31226	TGAGCGTCTCCATGGCGCGCACCATGGCCTGCATGGCGGTAAAGATGTTC	ENSMUST00000043604	Gna11
GNA15_30305	GCAGCCGGTCCATCGCATCTATCATGGCCTGCATGGAGACGAAGATGTTC	ENSMUST00000043709	Gna15
GNAI1_31395	TGTAAATTTCCTTTGTGTCCTTCCTTTTATTGAGGTCTTCAAACTGACAC	ENSMUST00000074694	Gnai1
GNAI2_30647	TAGATTAGCGCTAAGGAGCTACATTTAGGTTAATGGAGCCAGGGCCCAGG	ENSMUST00000192615	Gnai2
GNAI2_31913	TGGCCATGATAGACTGGATGGTGTTGCTGTAGACCACGGCACGGTACTGC	ENSMUST00000192615	Gnai2
GNAL_31497	TCCCGAAGTCTGTTGGTATTGTTATCTTCCCGGATCACCATGTTGTAGCT	ENSMUST00000025402	Gnal
GNAQ_30040	TATTCGCTAAGCGCTACTAGAAACATGATGGAGGTGACATTTTCAAAGCA	ENSMUST00000025541	Gnaq
GNAS_31770	CGGTCTCGGATTCGATATCGGACTCAGGCTCGGTCTCAGAATCGGTCTCG	ENSMUST00000180362	Gnas
GNAS_32093	TGCCACACTTCTCGGATGCCAACTTTTGGTACAGTAGATTATCAATATAT	ENSMUST00000180362	Gnas
GNB1_31217	AGCGCTTGCTGCTTCCGATATGTGTGCAGAATAGCAACAGTAATGGACAA	ENSMUST00000165335	Gnb1
GNB5_30513	ACTGTTGACATCCGATTCATGAGTTTCAAAGGCTTGCACGCACTGGCCAG	ENSMUST00000076889	Gnb5
GNG3_30814	CACCTTTATCCGGCACAAGCTGGCCTCAATCTTAAGCTGTTCCACCATCT	ENSMUST00000096259	Gng3
GNGT1_31439	TGTCACTTCCTTCTTAAGCTGGTCTACCTCCATCTTCAACTTGTCCTTTT	ENSMUST00000031673	Gngt1
GNMT_32228	TCTTTCCTCCGGTTCCAGCGCTCCTTAAGCGCATATTTCAGCATCTTGTC	ENSMUST00000002846	Gnmt
GNPDA1_31631	AAGGCGGACACCGTCCACATGTGGTTCACGCCCTCCTCGATGGCTTTGTA	ENSMUST00000063814	Gnpda1
GNRHR_30106	GCATACCACTGAACAGTAATATTCCACATCCCATCCAGTGGCATGACGAT	ENSMUST00000031172	Gnrhr
GOLT1B_31718	AACCCAGTGGCCTTCACCTTGTGCCTCTGGAAGAAGAATCTGAACGTTCT	ENSMUST00000032372	Golt1b
GOT1_29697	AGAGCTCGAAGCCTTCAGACACAAAATAGCGAATAGCCCACGCATCTTTC	ENSMUST00000026196	Got1
GP49A_30210	ATCACCAGCTCCATGGCATCACTGTGCTCTGAGAAGCCAGCAGCACTCTT	GP49A	Gp49a
GPATCH8_31778	GAGGCTGGAAAGGCCTTCACTTGTTTGGCCAGAAGCTGCTGCTGGATGTG	ENSMUST00000143842	Gpatch8
GPC1_30915	CACGTAAACGGTTGGTCATGATCTTGAGCTGCATAATCTGCTGGCGGATG	ENSMUST00000045970	Gpc1
GPM6B_29535	AAATTAGGCTTTAGACACCGCCTCTTCTAGAACACTGGACTCTTAACAGC	ENSMUST00000112227	Gpm6b
GPR137B-PS_30894	AGCCCATATCCCAGCCCTGACTCTTAAAGGAGAACGGCTTGTCTGTCCAG	ENSMUST00000181570	Gpr137b-ps
GPR17_30332	GAGGTGGACCTGTGAGCCGTTTGCTGCAGAGCAAGTTGCACAAGGCGTGG	ENSMUST00000064016	Gpr17
GPR56_31534	TCTGCAGGTCTCAACACCCAGCAGCAACAGCTGGACCCAGAGGTGGCCAG	GPR56	Gpr56
GPRASP2_30008	CCCAAGCCCATGGCAAGGAGGTTTGAATTCGATGGTAACCTCGTCCCAGG	ENSMUST00000173804	Gprasp2
GPS1_31386	GAGGAGACTTGACATGGATCTGGTTGCGGAGCACAGCTGCTCTCAGAATC	ENSMUST00000208737	Gps1
GPX1_30525	TCACTTCGCACTTCTCAAACAATGTAAAATTGGGCTCGAACCCGCCACCA	ENSMUST00000193987	Gpx1
GPX2_31292	AGAACGACTTGGCAATGTAAGCCATGCTGAAGAGCAGTGAGCCCTGCCCT	ENSMUST00000082431	Gpx2
GPX4_31541	GCTTAAGTAAGCGGCTCAGACGGCCCCAGCTCATCTCGGCGGCCGGAGCC	ENSMUST00000105372	Gpx4
GPX4_32041	CTGTACATGTCAAACTTGACGTTGTAGCCGGCTGCAAACTCCTTGATTTC	ENSMUST00000105372	Gpx4
GRB10_29721	AAGGCCACGCGGATGCAGTGGTGTTTCAGCTTGCAGGGCAGAACACCTTT	ENSMUST00000093321	Grb10
GRB14_30604	CCTGCTTCTTCCTTGAATTGGCCCTGGGAAACAGGCCTGCTGACAGCACA	ENSMUST00000028252	Grb14
GRB2_29420	CCAACCTCGCTGCTGCTCCCTGACTGCGGCGCCCGCTGCCCCGACCGCCG	ENSMUST00000021090	Grb2
GRB2_31853	GATCTGTGGTAATCTACCAGCTCATTCAAAGAATTAAACTTCACCACCCA	ENSMUST00000021090	Grb2
GRB7_31752	GTGGAGACTCCTCACAATGCACCGCCTCGAATTGCTCTTGCCCTTCCTAC	ENSMUST00000019456	Grb7
GREB1_29668	AAAGAGCGGCCTGTCTTCCTTGGCATTGGCTGTCTGGAACTCATCCCGCA	ENSMUST00000162112	Greb1
GRIA2_31786	CTTCTCCCTCTCTCCTCTCTCACACGCGCGCGCACACACATACACACACA	ENSMUST00000075316	Gria2
GRIA3_31247	AGGTCATTGCACCATCAGCAATATTCGTGTCATGCCCGACACCAAGGAGA	ENSMUST00000115103	Gria3
GRIA3_31810	TTCATCGTATCACACGGCTTTCTCTGCTCAATGTACTCATTCATGGTTGA	ENSMUST00000115103	Gria3
GRIK2_31542	TTGTATCAGCTGGCAGCTGACGAATTTTAAGTCGAAGATTGTACCTTGAT	ENSMUST00000105483	Grik2
GRIK5_30057	AAGGTCATGGTGGAGCCAGCGTGGATAGTGCCGTACTCAATGTTGGTCTG	ENSMUST00000003468	Grik5
GRIN1_29324	TCAGCTGCACTCTCATAATTGTGCTTCTCCATGTGCCGGTACATGGTGCT	ENSMUST00000114310	Grin1
GRIN2A_30561	CAACATGGAAGATGCGGCAGTGGTTAAGATCCCAAGACCGTCTCTCACTC	ENSMUST00000199708	Grin2a
GRIN2B_31293	GCATGTCCGAGGCAGCAGTGGTGATGATGGCAATCCCATCTCTCACTCTG	ENSMUST00000152012	Grin2b
GRIN2C_31282	CTGATTCCAGGCTGGAGATCCGCCTCCAGGTGCAGGACCTTGGAAACCCT	ENSMUST00000106554	Grin2c
GRIN2D_30813	AGGTGTTCCCAGGCGAAGACCAGCAAGGAGAGGCCCATGGCCACGAGGAG	ENSMUST00000002848	Grin2d
GRM1_29524	ATTCAGCACACCTTCATGCCAGGTTCCCACATGGACATAGTCATAGCGAT	ENSMUST00000044306	Grm1
GRM2_29693	CCTGCCCGCAGATAGGTGAAGATGTTGTAGCGGCCAATACCATCTCCAAA	ENSMUST00000201681	Grm2
GRM3_30388	TGTATCTTCTAGTACCTGGAGTCTCCAAGATAAGCCACACAGACACCATC	ENSMUST00000004076	Grm3
GRN_31278	TTTCCATTAGCCATTGCTCGGAGATCCAGGGCTTCCATTGGTTACTTGTC	ENSMUST00000049460	Grn
GRWD1_29441	ACCGTGTCCTCAGTTGGTGACCACTGCAGATCCTCCACAGACCGTGTGTG	ENSMUST00000131384	Grwd1
GSK3B_30435	AAATGAATGTGCACAAGCTTCCAGTGGTGTTAGCCGGGCGGTAGGTGTGT	ENSMUST00000114750	Gsk3b
GSR_30529	AAGCGCTTTCCCACAGACGTCTCCCACAGCATAGACGCCTTTGACATTGG	ENSMUST00000033992	Gsr
GSTA1_31374	ACATAGAGGAGAACTTCCAGTAGGTGGATGTCCACCCTGGTCAGCCTGTT	ENSMUST00000098537	Gsta1
GSTA2_31572	AGGCTGGCATCAAGCTCTTCAACATAGAGAAGAAGTTCCAGCAGGTGGAC	ENSMUST00000034902	Gsta2
GSTA3_30777	AACTGAAAATCTTCTTTGCTGACTCAACACATTTTGCGTCATCAAAAGGC	ENSMUST00000121676	Gsta3
GSTM2_29098	CACTTGGGCTCAAATATTCGGTGTTGATCAAGGACATCATAAACAAGAAA	ENSMUST00000012348	Gstm2
GSTM3_29784	AAATCGGGACTGCAGCAGACTATCATGAGCTGTATGCGGGTGTCCATAAC	ENSMUST00000004136	Gstm3
GSTM5_29785	TCTCCTGCAAACCATGTGAATTTCCCCAGGAACAATGAGAATTGTTTCAG	ENSMUST00000004134	Gstm5
GSTM7_29783	TCAGTGTCAATCTAGCCTTGGCTGTTCAGAGAGCTGCCAGAAACGGATTG	ENSMUST00000004137	Gstm7
GSTM7_31910	CCCAGTAACCCAGTGTCATGGGCATGGTGCCGAGGTCTGAACGGACAGGC	ENSMUST00000004137	Gstm7
GSTP1_30795	AGGACTTGGTGGATCAGCAGCAGGTCCAGCAAGTTGTAATCGGCAAAGGA	ENSMUST00000169613	Gstp1
GSTT3_31186	CTGGTTCCGCAGGAACTTGTCCTCTAGCACCTGCAGGCACCCATCCAGTT	ENSMUST00000173537	Gstt3
GSTZ1_30817	AGAAATCATGCGCACGATGGCTCTTTTCTGTGGGTCCTGAGGCAGGAGCC	ENSMUST00000063117	Gstz1
GTF2A2_30869	GAAATTGACTCTGTTCCTGACTCTCTGAGCCAATGCTGAATTTATAGCTT	ENSMUST00000118198	Gtf2a2
GTF2B_30098	AGACAAGCAGAGGCTATCGCGTCATTAGCTCTGCCCTTCAGGCTCTTCTG	ENSMUST00000029938	Gtf2b
GTF2E2_30087	GTCTTCTAAGAGAATTCCTCCTAGTCCCCGCTGGTCATGATTGTCTAAAA	ENSMUST00000170705	Gtf2e2
GTF2F2_31151	CTCAAAGGCAGAGAACAGCATGTCTAGGACGTGTTGTTTGTCTGCCCGAG	ENSMUST00000088922	Gtf2f2
GTPBP8_31208	GTCTCTACCATGTCAACGAAGTCTTCGGGTGCTCTATAGCCATACCCTGG	ENSMUST00000162512	Gtpbp8
GTSF1_32173	TCCATGGCAAAACATAGGGCAGAGACTTGGGAACTCGCATGCCTGAAGCA	ENSMUST00000023129	Gtsf1
GULP1_29299	GCATTCCAGCAATCTGTTTTCTTGTCTCTACATCTTTTCCTCCAGATTCT	ENSMUST00000162600	Gulp1
GUSB_32180	GGTATAGAGGACCACAGATCGATGCAGTCCCGCATAGTTGAAGAAGTCAA	ENSMUST00000111308	Gusb
GXYLT1_29393	ACCACAGGCAACAACAGCAAGGTGCATTTTCTCATCGGGCCTTGTTTTCA	ENSMUST00000049484	Gxylt1
GXYLT2_29764	TGCCTCAGAAGCTTCCAGATGTCGTCCACAGGCCGCAGAAAGAGGACGTC	ENSMUST00000032157	Gxylt2
GZMA_30882	CGCCAGCACAGATGGTATTTGAACTAAGTTTAAGTAGAGCCATATACGGT	ENSMUST00000023897	Gzma
GZMB_29755	TCCAGGATAAGAAACTCGAGACTTTGGTGAAAGCACGTGGAGGTGAACCA	ENSMUST00000015581	Gzmb
GZME_29530	GCAGCAGTCAGCACAAAGTCATCTTGAACCAAGAAGCCTCCACAGTATCT	ENSMUST00000089549	Gzme
H1F0_29802	CTTTGGAGGCAGCCTTCTTGGGCTTGGCTGCCTTCTTTGGAGTGGCCACT	ENSMUST00000180086	H1f0
H2-AA_31286	TGCTATTTCTGAGCCATGTGATGTTGATCACAGGAGGGAAGATGTTGTCC	ENSMUST00000040655	H2-aa
H2-DMA_31030	CTCTCAGACCCTCCCAAGTCTCCTTCCAAAGAAAGTTGGCATTGAATGTG	ENSMUST00000042121	H2-dma
H2-K1_30014	CCCTGATGGTACACATGGCATGTGTAATACTGCTCCTTCCCAAGAGGCAC	ENSMUST00000172912	H2-k1
H2-KE6_31728	TATGACTCTGTCCCAGTCTTCTTCTGACATGTGGAGCAGAAACTCATCGC	ENSMUST00000045467	H2-ke6
H2-Q6_31131	AGCTCATGTCCTTGGAAGCATCAACTGCAGAATACTATCAGAATTTTTGG	ENSMUST00000174699	H2-q6
H2-Q6_31808	GTCTCCTTCTCTTCATCACAAAATCCACCACAGCTCCAATGATGGCCAAG	ENSMUST00000174699	H2-q6
H2-Q7_29061	ATTAACAAGCAATCAACCCTCAGCTCAAGATGATAACAATCAAGGTCACA	ENSMUST00000076256	H2-q7
H2-T23_30494	TAGGCGTCCAACAGAAATGAGAATTGAGACTGCATCATTTGTGTCTTTAT	ENSMUST00000102678	H2-t23
H2-T3_29650	TCTCATGTTCAGTGTGGAAATGAGTAGACACACTGTGCCGTGTGAGGAGA	H2-T3	H2-t3
H2AFV_29822	TGTACACAGCAGCAGTGGCGCCCACCCGTCCATGGCTTGTGGTGCGAGTC	ENSMUST00000109737	H2afv
H2AFV_31972	AATCCAACTCTTCATCACCGCGGATTGCAAGCTGTAAGTGACGTGGGGTG	H2AFV	H2afv
H2AFX_31562	GTCTTGCCGCGTCCGGACATAGTGTACGAGGTAGAAGAGCTGCGAACAAC	ENSMUST00000052686	H2afx
H2AFZ_31887	TTCAAACTGCGCCGTCTCCCGCCTTCCTCGCGCCCTTTATACTGCAGAAT	ENSMUST00000041045	H2afz
HAAO_30265	AAGGAGGCCCGATTCTCTTCTACCCAAGACTTCACTCTCACACGGCGTTC	ENSMUST00000000687	Haao
HADH_29437	GAGACAGGATGCTTTCCTAAGGTTTTACAAAAGTCCACCAGAGATTCAAA	ENSMUST00000029610	Hadh
HADHA_31123	CTTGGCAGGCAGCCTCAGATTTGCCAAGATATTATCCATTTCAGAATTCA	ENSMUST00000156859	Hadha
HAO2_29305	CAGGAACCTCATCAAGCTGCCTCCCGCCATGGTTGGAAACAATGATGCCT	ENSMUST00000029464	Hao2
HAT1_30881	TGCTGCACACTTATTTCTATCTGGTTCATCTGATTTGTCAGCTCTTCTGG	ENSMUST00000112122	Hat1
HAUS3_29933	CGTCTTCACATCAGCAAGAATATCAGTAAGGAGATGATGTAGTTCATTCA	ENSMUST00000060049	Haus3
HBA-A1_29333	GAGTCTGTCAGAATCAGAAGTGTCTTGGACCTGCAGCAAGTAGCACTTAT	ENSMUST00000093209	Hba-a1
HBA-A2_29332	TGGCCAGAGCATCGGCGACCTTCTTGCCGTGACCCTTGACCTGGGCAGAG	ENSMUST00000093207	Hba-a2
HBA-X_29963	ATGGACATGATGATAGCTCTCTCATTCTTCATCAGAGACATGGTGGTGGT	ENSMUST00000020531	Hba-x
HBB-BH1_29104	CCAAGTCCACTTTATCCCAGATGCTTGTGATAGCTGCCTTCTCCTCAGCT	ENSMUST00000063957	Hbb-bh1
HBB-BS_31701	GGAGCAACTGATCCTACCTCACCTTATATGCTCTGCCCTGGCTCCTGCCC	ENSMUST00000023934	Hbb-bs
HBB-Y_29372	TGTCACAGTGCAGTTCACTGAGCTTGGCCAAGGCAGACTTGAGGTTGTCT	ENSMUST00000033229	Hbb-y
HC_31405	TTCCACACATGTGCAAGCTGCTCCTTCACAGACTTTCTGAAGCCTGGTGT	ENSMUST00000028233	Hc
HDAC1_31793	CCTCTTCTTTGACCCCTTTGGCTTCTGGCTTCTCCTCCTTGGTTTTCTCT	ENSMUST00000102597	Hdac1
HDAC2_30450	CCTGATGCTTCTGACTTCTTGGCATGATGTAGTCCTCCAGCCCAATTGAC	ENSMUST00000105510	Hdac2
HDAC6_31734	AGCCATCTTTGATTTAGCCTGGCCTAGAGTAGACTCTTTCCCAGGTAGTG	ENSMUST00000115642	Hdac6
HDC_29443	GAAGTGCAGTGCTGGCTCAGGACAAGGTTAGCAGCCTCTTGGATGAGGTG	ENSMUST00000028838	Hdc
HDGFRP3_31106	TCTGCAGTCGTGTTTCTCGTGTCATTGCCAGCGTCTCCGCCCTCAGAGCT	ENSMUST00000107305	Hdgfrp3
HEATR1_29954	TGCTAGGAAAGGAATGGACTCTGGTAGCAGAACAATGTAATTCTCTCTCA	ENSMUST00000059270	Heatr1
HEBP1_29916	ATAGACATCACCCTGGTAGGTCGCTGGTGTGCCCTCCAGTGTGGTCCGTA	ENSMUST00000045855	Hebp1
HECTD2_29691	GTCGTACTGTGTGCTCCTCTGCAGTGCATGCATATCCAGTTCAGGACTGC	ENSMUST00000169036	Hectd2
HELLS_29658	TTTAGCAGCTGCTCTTTCCACAATTTTCTGGTCAATAGTATTTGCTGTTA	ENSMUST00000025965	Hells
HERC6_30292	TGATTGCAACCTGAAGTGCTTCCTTCATCCTTCGCATTGAGGAATACTTA	ENSMUST00000031817	Herc6
HERPUD1_31617	CACCCATGACCATGAGAAATCTGCTCAGCGAGGAGTAGAAGTAAAGGATG	ENSMUST00000161576	Herpud1
HES1_31102	ATGGAGTCCGAAGTGAGCGAGGAGCCACTGGAAGGTGACACTGCGTTAGG	ENSMUST00000023171	Hes1
HEXA_30635	CACAACGGAAATGCGACAAACGTTTAAAGGCAAAGTCTATATTAGTTGTC	ENSMUST00000026262	Hexa
HEXB_31500	GCAGGGAAGCCAGAGCCTGTGACTTGCTTTAGCTCATATGAATAATGCTC	ENSMUST00000022169	Hexb
HFE2_30042	ACATCAAAGACGCAGGATTGGAAGTAGGCATCTTCAACCGGAAGCCCTTC	ENSMUST00000049208	Hfe2
HGF_30161	ATGTTTAAGATCTGCTTGCGCTTCTCCTCGCCTCTCTCATGAACATCGTG	ENSMUST00000199581	Hgf
HIF1A_30830	AAGCACGTCATGGGTGGTTTCTTGTACCCACACTGAGGTTGGTTACTGTT	ENSMUST00000110464	Hif1a
HIGD1A_32140	CCCAATTGCCTCGAGGTTCTCGCGACCGGTTCGCTGGGCTCCGCGAACGC	ENSMUST00000060251	Higd1a
HIST1H2AO_32213	GGCCGTCAGGTACTCCAGCACGGCCGCCAGGTAGACCGGGGCGCCGGCGC	ENSMUST00000091745	Hist1h2ao
HIST1H2BB_31175	AATAGCTCTCCTTGCGGCTGCGCTTGCGCTTCTTGCCATCCTTCTTCTGC	ENSMUST00000099703	Hist1h2bb
HIST1H2BC_29206	TGGTTAATCTGCTAGTATCACCCATTTGCACTGTCTTGAGGTTACAGCAT	ENSMUST00000018246	Hist1h2bc
HIST1H2BF_29400	GACGTGATGGTCGAGCGCTTGTTGTAATGCGCCAGGCGGGAAGCCTCGCT	ENSMUST00000105106	Hist1h2bf
HIST1H2BG_30236	TACTTAGTGACAGCCTTGGTGCCCTCCGACACGGCGTGCTTGGCCAGCTC	ENSMUST00000079251	Hist1h2bg
HIST1H2BL_30794	GAGCGCTTGTTGTAATGCGCCAGGCGGGAAGCCTCGCTCGCGATGCGCTC	ENSMUST00000091756	Hist1h2bl
HIST1H2BM_30634	GGTGCACTTGCTTTAGCACCTTGTACACGTACACCGAGTAGCTCTCCTTG	ENSMUST00000110476	Hist1h2bm
HIST1H2BN_31345	GATGTGATGGTCGAGCGCTTGTTGTAATGCGCCAGGCGGGACGCCTCGCT	ENSMUST00000091709	Hist1h2bn
HIST1H2BP_32216	ACACCGAGTAGCTCTCCTTGCGGCTGCGCTTGCGCTTCTTGCCATCCTTC	ENSMUST00000110473	Hist1h2bp
HIST1H3A_31343	GGCATGATGGTGACACGCTTGGCGTGGATGGCGCACAGGTTGGTGTCCTC	ENSMUST00000091701	Hist1h3a
HIST1H3C_30792	ACAGACCCACAAGGTAGGCCTCGCTCGCCTCCTGCAGAGCCATGACAGCC	ENSMUST00000091752	Hist1h3c
HIST1H3G_31098	TCAAACAGACCCACGAGGTAGGCCTCACAGGCCTCCTGCAGAGCCATGAC	ENSMUST00000080859	Hist1h3g
HIST2H3B_31322	GGTCCGTCTTGAAGTCCTGCGCGATCTCGCGCACCAGGCGCTGGAACGGC	ENSMUST00000098843	Hist2h3b
HIST3H2BA_30440	TGATGCCCATGGCCTTGGACGAGATGCCGGTGTCCGGATGCACCTGCTTC	ENSMUST00000078267	Hist3h2ba
HJURP_30097	CAGCAGCTTTCATTGGCGATACTCTGCCACACGAAGTCACCTTCGCCCGC	ENSMUST00000054674	Hjurp
HK1_29596	CCCACTGTTTAGAGAATATTCGTCCACCACTTTGTCGAAGTCTGTTCTGA	ENSMUST00000116238	Hk1
HLF_30768	CCCCGAAATGTTGATGAGCTTTGTTTCCTCCGTCCTTTGCCAACCAAAAG	ENSMUST00000004051	Hlf
HMBS_29804	TCCAGAGAAGCAAGACCAGAGGAAAAGCTGTAATAGGATCTGTTGTGGCA	ENSMUST00000097558	Hmbs
HMBS_31942	GGCCCACCCGGTTCTGCCAGCCCATGCGCTGTAGGCCAGCCACAGCCAGG	ENSMUST00000097558	Hmbs
HMG20B_30149	ACCTTGTAGGCCTCTGACTGCTGGTATGCCCACAGCTCCTTCAAGTACTG	ENSMUST00000122993	Hmg20b
HMGA2_31791	TGGAGGTAGGGAGAGGAGGCGGGAAGCGAAGGAGAGGGAAGAGTTGGAGG	ENSMUST00000159699	Hmga2
HMGB2_31787	TCTTCATCCTCCTCTTCTTCCTCGTCATCTTCCTCCTCTTCCTCCTCTTC	ENSMUST00000067925	Hmgb2
HMGCR_29103	TGCAGCCTCTGTTAGTGCTGGCCACAAGACAGCCTTCCGTCGTTGCCATC	ENSMUST00000022176	Hmgcr
HMGCS1_31729	TGTGTCCTCTCTGAGCTTCATGTTTTCAGCAAAGACATCCGGTGCCACAC	ENSMUST00000179869	Hmgcs1
HMGCS2_29615	CCTGAAGGCCTCTAGGCCCTTGTATAAGTTGTTCTGTTTGTCACTGCTGG	ENSMUST00000120541	Hmgcs2
HMMR_30734	AGCTGTGCATAGGAGTCTCTGATTTTATTTAGCTGCTCCTGAGTTGCACC	ENSMUST00000020579	Hmmr
HMOX1_31505	TAGCCTCTTCTGTCACCCTGTGCTTGACCTCAGGTGTCATCTCCAGAGTG	ENSMUST00000005548	Hmox1
HN1L_30427	CCAAATATGTCACTGGTCTTCCCCCCTGGTGGATTCAAACGTTGTCGAGT	ENSMUST00000024981	Hn1l
HNF1A_29713	GATGACACTATGGTTGGATGGCAGCAGGTGGCTGTGCCCGTTGGAGTCGG	ENSMUST00000031535	Hnf1a
HNF4A_32131	AGGCTTGACGATGGTGGTGATGGCTCCTGGCAGGAGCTTGTAGGATTCAG	ENSMUST00000109411	Hnf4a
HNRNPA1_30367	GGATCTCTCATTACCACACAGTCTGTTAGTGTTCCCCATTGCTCAAAATG	ENSMUST00000036004	Hnrnpa1
HNRNPA2B1_30458	CCCATTGCTCATAGTAGTTTCTCAAACTTTCTTCTGTGGTTTCAAAGCTT	ENSMUST00000090002	Hnrnpa2b1
HNRNPDL_32152	AATGGCGGCGGCACATGGGAGAGCCGGGGCGGGACCTCCATCGCCGCGCT	ENSMUST00000128187	Hnrnpdl
HNRNPH1_30029	CTGCCAGTGCCCGAGCTAGTCCTGTACCCCACTTTGCCTAACGGACTCGC	ENSMUST00000109142	Hnrnph1
HNRNPH1_32039	CTTTGCTCTATCATCCTAGGTGACTGCTATGCTCAACATTGAGCCTTCTT	ENSMUST00000109142	Hnrnph1
HNRNPU_29763	CGGCGCCAATTCCTTTCACCGAGTTCGCGAGGCAAGACGCGGAGACTCGC	ENSMUST00000037748	Hnrnpu
HOMER2_30050	CGATAGCTGTTCCTGGTGACATCATAGAAGTAGGAAACCGTGACGGCCTG	ENSMUST00000098326	Homer2
HOOK1_31626	ATTTACAGAGAACTCTTCTGCACTCAGGTTTCTCTGTCCATACCTGCATA	ENSMUST00000107083	Hook1
HOOK2_30538	TTGTCCACGTAGCGGCGGTATCGTTCCTCCATGGCCCGCAGGTCTGCATC	ENSMUST00000064495	Hook2
HOXA10_31645	TGAGCTGATGAGCGAGTCGACCAAAAAGGAGTTCGCGGCAGGGCTCTCCG	ENSMUST00000125581	Hoxa10
HOXA10_31922	GAGGTGGACGCTACGGCTGATCTCTAGGCGCCGCTCTCGAGTAAGGTACA	ENSMUST00000125581	Hoxa10
HOXA5_30004	CATTGTAGCCGTAGCCGTACCTGCCGGAGTGCATGCTCGCCGAGTCCCTG	ENSMUST00000048794	Hoxa5
HOXB3_30971	TAGCCGAAACCATTGCTGCCAGGGTACGAGGAGTAGCCTCCGAAGAGCGC	ENSMUST00000093944	Hoxb3
HOXB5_29383	GCCGGCTGTAGCCAGACTCATACTTTTCAGTTTGTTGTCTTTCTTCCACT	ENSMUST00000049272	Hoxb5
HOXB6_29416	ATAAAGGAGCGTTCGGTATCTTCTTCAGCTTCCAGATAATATTGTCCCAA	ENSMUST00000173432	Hoxb6
HOXB6_32019	CTGAGCTGAGACGCACTGAGCAGTTTGCTCTCCTTTTTCCACTTCATGCG	ENSMUST00000173432	Hoxb6
HOXB8_29889	TCACCCTTCTGCGCATCGCCCTGCTCGGCGGTCTCTGGTGCCCGCTCCAG	ENSMUST00000168043	Hoxb8
HOXC10_31349	CTGTCTGTAAGGTTAATGGTCTTGCTAATCTCCAGGCGGCGCTCTCGCGT	ENSMUST00000001699	Hoxc10
HOXC8_29801	GATTTAAGTGGCCTTGTCCTTCGCTACTGTTAGTGTTGGCGGAGGATTTA	ENSMUST00000001703	Hoxc8
HOXD8_29844	CTCTGATTTAAGTGGTCTGGGTCCTCGCCAATATTACCACTGGACGATTT	ENSMUST00000151380	Hoxd8
HP_29396	TCATAGTGCACCACACACTTGTCCTGGTCGGCCACAGGCAGCATGACATA	ENSMUST00000074898	Hp
HPN_30867	TGACTTTGGTGTACACTCCTGGCTTCCGGGCCAAAGCACAGCCCGTACCC	ENSMUST00000108102	Hpn
HPRT_30325	TCTACAGTCATAGGAATGGATCTATCACTATTTCTATTCAGTGCTTTAAT	ENSMUST00000026723	Hprt
HRAS_30509	GGCAAATACACAGAGGAAGCCCTCCCCTGTGCGCATGTACTGGTCCCGCA	ENSMUST00000026572	Hras
HS2ST1_29856	TTTGTCTCCTTGTTTCCGTCTCCTTAATCCTGGTCTGTAATCATCTCCAA	ENSMUST00000043325	Hs2st1
HS3ST5_30445	TCCTCGGAGGAAGGTTTAAGAACTTTTCCACCAGCTGTAGTTCCGGCAGA	ENSMUST00000058738	Hs3st5
HS6ST2_29488	CCAGAAGGACTTTGTTTCTTTGCTTTTCAGGCATGACAGAGAGGTTGTAG	ENSMUST00000088172	Hs6st2
HSD11B2_30904	GAATTCAGGAACTGCCCGTGCACGTGCTCAATGTAGTCTTCACCATAGGC	ENSMUST00000034363	Hsd11b2
HSD17B10_31244	TTCACGCTCCGAACTGCCGCAGCCATCTTGCACAAGCCTCGCCACCAGAG	ENSMUST00000026289	Hsd17b10
HSD17B11_31408	GCACGATGTTCGCACTCCTGTTCGTCCCAAGGCAGCCAGCTCATCAGTCA	ENSMUST00000031251	Hsd17b11
HSD17B12_31020	GGTTCGGGTCTGCAAACCTACTGTTTTAATTGCAGACTTCACAAATGTCT	ENSMUST00000028619	Hsd17b12
HSD17B6_29340	CCCAGACTTTCTTAGTTCTCTCAATGGTTAACTCTGCATCTGTCATTTCC	ENSMUST00000026462	Hsd17b6
HSD3B1_30309	AGCCCTCAGATCAGGACTAGTGTTTTAATCTCTAGTCTGCTGACTTATCA	ENSMUST00000107016	Hsd3b1
HSD3B1_31904	CCAGAATGTGTGCCCAGGCCACATTTTCCACATATACTGGGTTGGCTATG	ENSMUST00000107016	Hsd3b1
HSD3B2_30890	GATCAGACCATGTACTTTCATGACACTCTTCCTCATGGCCATTCAAGACA	ENSMUST00000107022	Hsd3b2
HSD3B3_31113	TTCTTGTAGGAGAAAGTGAACGTACTAGCTGTCAGTGTGACCAAGTGGCG	ENSMUST00000107019	Hsd3b3
HSD3B6_31943	ATTTGCCCGTACAACCGAGAATATTCTTATTTTTGAGGGCCGTAATTATT	ENSMUST00000029463	Hsd3b6
HSP90AA1_31761	CAGAGGTTCTCAAATTTTGTCTTTTTCTCTTCCTGTTTCTTCTTTTCCTC	ENSMUST00000094361	Hsp90aa1
HSP90AA1_31929	TCAGTTACAGCAGCACTGGTGTCATCCACAGTAGGATCATCCTCATCAAT	ENSMUST00000094361	Hsp90aa1
HSP90AB1_31754	GTAGCCCATTGTAGAGTTGTCTCGCAGTGCCTGGGCCTTCATGATCCGTT	ENSMUST00000024739	Hsp90ab1
HSP90B1_31344	ATCTGTCCTTGAGCCTTCTCGGCTTTTACCCAGGTCCTCTTCCACTGTGC	ENSMUST00000020238	Hsp90b1
HSPA1A_31063	CTCTTCATGTTGAAGGCATAGGATTCGAGCGCGTTCTTGGCGGCCACCCT	ENSMUST00000087328	Hspa1a
HSPA1B_32188	AACTCCTCCTTGTCGGCCAGCGTGTTGGAGTCCAGCCAGGAGATGACCTC	ENSMUST00000172753	Hspa1b
HSPA1L_29519	TGTTGGCCTTGCCGGTGCTCTTGTCCATGGCCGTGACGTTCAGGATACCG	ENSMUST00000007248	Hspa1l
HSPA2_29227	GCTGCCACGCGATCGCGATTTGCTTCATCTTCCGATTTGTACCGCTCCGC	ENSMUST00000080449	Hspa2
HSPA4_30510	TCAATCAATGTCCATCTCAGGAAGCTTCTTGTCGCCATCAGAAGGCACAG	ENSMUST00000020630	Hspa4
HSPA4L_30531	GAGAAGCAAAGGAGAGGACCCACTCTCTATCGGAAAATCTAGGGCAGGGC	ENSMUST00000204702	Hspa4l
HSPA5_29651	GGTGTCAATGCGCTCTTTGAGCTTTTTGTCTTCCTCAGCAAACTTCTCAG	ENSMUST00000028222	Hspa5
HSPA8_31960	TCTCTCTTATACCCTGTCTTAGAACCTTCCAGAAGGGTGCCGCCCCATCC	ENSMUST00000015800	Hspa8
HSPA8_32168	CGCTGCCGATCATAGCTTCTTAGCCAATGGACGACCAGCCCTTGCCGACT	ENSMUST00000015800	Hspa8
HSPB1_30392	CAATTTGGGCGCGGGCCTCGAAAGTAACCGGAATGGTGATCTCCGCTGAC	ENSMUST00000005077	Hspb1
HSPB6_30489	GAAACGCTGGTCAAAGAGGCGTCCCGGAGCAGAGAAACCTGGTAAAGGAG	ENSMUST00000044048	Hspb6
HSPD1_29930	AGAGCACGAGGCGAGGCAGGCCGTCTGCGGCGAGTGAGGGACCCAGCTCT	ENSMUST00000027123	Hspd1
HSPH1_31079	AGCCAAATGCTTTCCGTCTACACAATGTCTGCCTTCTTCAGTGGGCTACA	ENSMUST00000201452	Hsph1
HSPH1_32074	ACATAGCTTGTCCCTGAACTCATATACACACTCCTCCACGGCGTTCTTGG	ENSMUST00000201452	Hsph1
HTATSF1_30434	GCCGGTTCCGGAGGCGCCACAGCTTCCTCCCCGCCACGTCAGGCAACGAG	ENSMUST00000114751	Htatsf1
HTR1F_31582	CCGCTCTCCAAGAAGACTTGACCGTTCAGCTCCTCCTTTATCATCCGACT	ENSMUST00000063076	Htr1f
HTR2C_31555	TTGAAGAGAGTGTACACCAGAGGATTGATGCCTGAACACACATAGCCAAT	ENSMUST00000096299	Htr2c
HTR2C_32261	CGTTCATTGGTATGCCGATAAATGTTAACATTGAGCTCCCTCCCAGACAA	ENSMUST00000096299	Htr2c
HTR5A_29585	GACCGATGGCCAATGGAGAGGATTTTGCTAAGAGCCAAGAACCTGGCCTC	ENSMUST00000036227	Htr5a
HTRA1_30748	TGAGCATTTGTCACAATCAGTCCATCCTCCGATACGATGAATCCTGACCC	ENSMUST00000006367	Htra1
HYOU1_29983	CAGGTAGAAGTGGCGCTGAGTTTCCCCGAGATCTCCTCCCGCTGTTCCTC	ENSMUST00000066601	Hyou1
IARS_31699	TTGTGTTTGAGTCTCATTCAGGAACAGCCTTAGCCTCCTGCTCCTCAGTC	ENSMUST00000165316	Iars
IARS2_29567	GAGTCCCTCATGGCGCACGCACTTTCCACTGCCTCCTCCAGTCCTGGCTT	ENSMUST00000027921	Iars2
IARS2_32098	CTGTTCCTTCTTTAAGTACAGCCTTGTTCTGAAGTTCAGGGCCTGCGGCA	ENSMUST00000027921	Iars2
IBSP_31601	TGGTCTCTGCTCCGTAGCTAGCTGTTACACCCGAGAGTGTGGAAAGTGTG	ENSMUST00000031246	Ibsp
ICAM1_29910	CTGGCGGTTATAAACATAAGAGGCTGCCATCACGAGGCCCACAATGACCA	ENSMUST00000086399	Icam1
ID2_31090	TGGTTCTGTCCAGGTCTCTGGTGATGCAGGCTGACGATAGTGGGATGCGA	ENSMUST00000020974	Id2
ID4_30949	CTCTAAGGTTGGATTCACGATTGCTCTTCTACTTAGCAGTCTGGTCGACA	ENSMUST00000021810	Id4
IDE_29799	CTTTAGTCCAGGCCACTTCAGTCATCAGCAAGCGGAGGTAGTACATGGCA	ENSMUST00000131070	Ide
IDH3A_29922	TTGCTCCGGTGGTTGTTCCGAGCGTACTCGAAGGCAAACTCTGCAATGCG	ENSMUST00000167866	Idh3a
IDH3G_31742	ATGGCCATGATGGCATTGCGGATGTCCTCCTCATCAGCGTTGGAGCTTAC	ENSMUST00000052761	Idh3g
IDI1_31040	TAACAGCATATCCAATCGCTCGCGCCAGTGTCCGTCCGCGCCACATGCCT	ENSMUST00000169314	Idi1
IER3_29851	CTGCGACACACCCTCTTCAGCCATCAAAATCTGGCAGAAGATGATGGCGA	ENSMUST00000003635	Ier3
IFI35_29182	CTCCAGCAGCGTCTGAAACACACTTCCACTGCTGTTGCTTGCTTGCCGGC	ENSMUST00000010502	Ifi35
IFI44_29813	TTGTTCAAAGGCAAATCCTCCAAGAATTCATTTGCAGTATACAGGATCTC	ENSMUST00000029671	Ifi44
IFIT1_29859	CTTCTGGAAATTTCTCTCTGCTTCTTCATACTGGTGAATTTCTGCCTGCA	ENSMUST00000102824	Ifit1
IFIT2_29861	GTACCTGGTTTGCAGAGTCCACTCCCCTCTCAGAGTCTTTATCAGCTTGC	ENSMUST00000102826	Ifit2
IFIT3_29860	TCTCCTCAGAGTTTAAATGTTCGACCTGGTTGCACACCCTGTCTTCCATA	ENSMUST00000102825	Ifit3
IFITM2_30327	TGGAGGAAGCCCGGCATTGGTGGACAAGAAGGCTTGAGAATTGTGGCTCA	ENSMUST00000081649	Ifitm2
IFITM3_29087	TGATGATGACACTAACAATGGTGATAACAACCATCAGGATGCTGAGGACC	ENSMUST00000026565	Ifitm3
IFNAR1_31389	CCCAGACAAGAGCAACCTGTGCTCTACCCGCTGAGCCAGCTCTTCAGGCC	ENSMUST00000117748	Ifnar1
IFNB1_30828	TCCACCCAGTGCTGGAGAAATTGTTTCTGAAGACAAGAAAGACATTCTGG	ENSMUST00000055671	Ifnb1
IFNG_30071	GCTGAAGAAGGTAGTAATCAGGTGTGATTCAATGACGCTTATGTTGTTGC	ENSMUST00000068592	Ifng
IFNGR1_30524	CCACATACACAGTATAGTCGAATGTGTAACAGGTGCTCCCGTCACCAAAC	ENSMUST00000020188	Ifngr1
IFRD2_31669	CGCGCCACCATCTTCGTGAGGCGCCCCGCCCTGTCAAATGGGTCGCTGGG	ENSMUST00000010192	Ifrd2
IGF1_31083	CTCTGTTCTCTGATTAACTTTCCACAGGGTTTGAAGGTACACTTGTGTGC	ENSMUST00000122386	Igf1
IGF1_32078	TCTCTGGTCCAGCTGTGGTGGAGCTGGTGAAGGTGAGCAAGCAGAGCGCC	ENSMUST00000122386	Igf1
IGF1R_30022	GCCCAATATCCTTGAGATTGGTCATCTCGAAGATGACCAGTGCGTAGTTG	ENSMUST00000005671	Igf1r
IGF2BP2_31560	ATTCTGACGATCACTTCCTCATTCTCGTCTGGCGTTTGGTCACGAGGCAC	ENSMUST00000100052	Igf2bp2
IGF2R_29430	TGTGAGCTTTCCACCTCCGCTCCTCGGCCTGAGTGAACTTTCACCTCTGG	ENSMUST00000024599	Igf2r
IGFBP1_30785	GATGAGACTCTGGACAGGCAGCAGTTGCTCAGTGGTCACGACTTTCTGAG	ENSMUST00000020704	Igfbp1
IGFBP3_31276	CCCAAGATCAACATACAGGTGATTTTCTCCATGCTCTTACCAGGCTCTCA	ENSMUST00000020702	Igfbp3
IGFBP3_31859	TAGACTCGGAGGAGAAGTTCTGGGTGTCTGTGCTTTGAGACTCATAGTCA	ENSMUST00000020702	Igfbp3
IGFBP6_29521	GTTTGGCACATAGAGCCCACGTGCTCCGCCTCGGAAGACCTCAGTCTGGA	ENSMUST00000023807	Igfbp6
IGFBP7_29447	CACCCAGCCCGTTACTTCATGCTTTTCTGGACCACCCCGGGTCTGAATGG	ENSMUST00000163898	Igfbp7
IGHA_32269	TCGAACAGTTGTAACAGTGAGTGCTGTGCTGTAGAACAAGCTCAGTAGGA	ENSMUST00000194738	Igha
IGHMBP2_31397	TGCAGAACTGGCCCAGAGTGGTGGTGCTGGCCGAGCACTTGGAGAAGCTA	ENSMUST00000025751	Ighmbp2
IGLC1_30645	GGACAAACTCTTCTCCACAGTGTGACCTTCATGAGTGACCTGGCAGCTGT	ENSMUST00000200568	Iglc1
IGLC2_29160	TAAAACCCAACCCAAAACCTATGGGGCCAGCACCTGGTCCTGTTCTCTCA	ENSMUST00000103749	Iglc2
IGLC3_31393	AGCTGCTGGCCATGTACTTGTTGTCCTCTTTGGTGGGATTTGAAGTGTCC	ENSMUST00000200235	Iglc3
IGTP_30275	CGGCTTCTTTCTTCTCTCTTCAACTTTATGGAGTATGAAGGTCTATGTCT	ENSMUST00000094169	Igtp
IIGP1_30403	AGAAAGGTCAGAGAAGGGATGATATTCACTAGGTCAGCAGCAAATCCTTC	ENSMUST00000032473	Iigp1
IKBIP_31154	TCTTCAGATTAGAGACCTTTGGCTTCAGATCGTTTGCAAAGCTCACTGCC	ENSMUST00000020150	Ikbip
IKBIP_31916	TGGGACGTGGCTGCAGAGCAGCTTCGGAAGGCCACGCCCACCAAGGCTGT	ENSMUST00000020150	Ikbip
IKBKAP_29569	CACGTTCTGAGCCAATCAGCACCGTGCCCTGCTCAGCTCGCAGACAGAAA	ENSMUST00000030140	Ikbkap
IKBKB_31661	CAGAGTTCCTTCTGCCGCTTCTCCTGAAGCCGGACCACGGTCCTCTCGTC	ENSMUST00000033939	Ikbkb
IKBKE_29786	TCAGACAGCTTATAGATGCTCTGCCCCTCCTCGCCCACCAGGCGCATGAT	ENSMUST00000062108	Ikbke
IKBKG_31308	TATGCACTCCATGACATGTATCTGTAGAGTGTCCATATCAGGAGCCTGAT	ENSMUST00000004330	Ikbkg
IKZF1_29161	CCTCTCGCTCCGATGACACAGACTTGGCCTTGGACAGCAGCAGCAAGTTA	ENSMUST00000065433	Ikzf1
IKZF1_31988	GTTAGAGTGCCCTGCTAAGTTGGCTGCGGAGCAATTCCCAGCTTTCTTTC	ENSMUST00000065433	Ikzf1
IL10_31636	TATTGTCTTCCCGGCTGTACTGGCCCCTGCTGATCCTCATGCCAGTCAGT	ENSMUST00000016673	Il10
IL11_29730	CAGAGTCTTTAGGGAAGGACCACCTGCACGGCGCAGCCATTGTACATGCC	ENSMUST00000094892	Il11
IL12B_31216	ATGCCCACTTGCTGCATGAGGAATTGTAATAGCGATCCTGAGCTTGCACG	ENSMUST00000170513	Il12b
IL13RA1_29950	CTCCAATCACTCCACAGTTTGTTGTCATCAAAGCATAACTTGTTTGTTTT	ENSMUST00000033418	Il13ra1
IL18_31667	TGTCAACGAAGAGAACTTGGTCATTTATATTCCGTATTACTGCGGTTGTA	ENSMUST00000059081	Il18
IL1A_30438	GCCAGGTGCACCCGACTTTGTTCTTTGGTGGCAATAAACAGCTCTGGATA	ENSMUST00000028882	Il1a
IL1B_30437	TCCATGGTGAAGTCAATTATGTCCTGACCACTGTTGTTTCCCAGGAAGAC	ENSMUST00000028881	Il1b
IL1F8_31369	CGCTGATGTGTGAGGATGATTGTCTGTCTTTCTATGGAAGAGGTGGCTAT	ENSMUST00000028363	Il1f8
IL1F9_29621	TCACAGGATCGCTCACAGGATCACTTACAGCAAGACAGATCTGTCCATTC	ENSMUST00000057567	Il1f9
IL1R1_30947	TAGTAATATCCTGAGTCCTCCACCTTGGCAGGTACAAACCAAAGATGTTC	ENSMUST00000027241	Il1r1
IL20_29153	CCAGTTAAAGGAGTCCAGAGAAGAAAACCCACAGCGGAGAACAGTCCAAA	ENSMUST00000027673	Il20
IL27RA_30223	TGCAGACAGTGGAGAGGCCTCTGCTCTGTATGCAGAAGGTGTAGTGAGTA	ENSMUST00000005601	Il27ra
IL2RG_30965	GGTGCTTGCTCTTCTTTCTCTGGGTGTAGTCTGTGTCAGAACCCTGAACC	ENSMUST00000033664	Il2rg
IL4_30280	GCCGATGATCTCTCTCAAGTGATTTTTGTCGCATCCGTGGATATGGCTCC	ENSMUST00000000889	Il4
IL4_31858	GAGTAATCCATTTGCATGATGCTCTTTAGGCTTTCCAGGAAGTCTTTCAG	ENSMUST00000000889	Il4
IL4I1_31417	TCAGCCTGGAACTGAGGTCATCCTTTAGCGCAGGCAGAACCAGGATGAAT	ENSMUST00000118125	Il4i1
IL4I1_31821	GTTGTTCAGGTTGTAGCCCAGCTTTTCTGGCATCTTCTCCACCACATAGT	ENSMUST00000118125	Il4i1
IL4RA_31300	ACGGTCATTTACATGCCCCGCCCCTCACCCAGCTCATTTTCACCCGCAGT	ENSMUST00000033004	Il4ra
IL6_29102	GCCGAGTAGATCTCAAAGTGACTTTTAGAAATTCTTCAAGTGATTTCAAG	ENSMUST00000026845	Il6
ILF2_31790	GAGTCTCCATGCTTTCTTCTTCTTCTCCTTGAGGTGGTTCTTCTGTGTTC	ENSMUST00000001042	Ilf2
ILK_30371	ACATTCCTCATTGAAGTCCCTGCTTTTCCTTGTACTCCAGTCTCGAACCT	ENSMUST00000033182	Ilk
IMMT_31641	CCCTTTGAGCTGATTGACAAACTTTGCTGCCAGCTCCAGGTCACCATGCT	ENSMUST00000064062	Immt
IMPDH2_32183	GCCGTCCGGACCGCGCCAATATAAACTAGATTATTCCGTCACACGTTGCG	ENSMUST00000081111	Impdh2
INA_29746	ACTGGGATTGGGCAGTGGATTCAGCCCCGAGATGCTTAACCCGCCGGTGC	ENSMUST00000037636	Ina
INHA_29953	AGATGAAACTGGGAGGGTGTACGATCCAGCGGTCCCAGCCCAGCTCTTGG	ENSMUST00000037330	Inha
INHBA_31771	TCCAGCCCTCCGTCACTCCCATCTTTCTTCTTCCCATCTCCATCCACCTC	ENSMUST00000042603	Inhba
INMT_29078	GAGACGCAGTTGCACTTCAGCACCTGACAGCCAGCATCTTGAATAGCCTT	ENSMUST00000003569	Inmt
INPP1_31478	GCGAAAGCAGGAAAGCGGATTACCTAAGCGAGGATGCAGAGCCCCAAGGA	ENSMUST00000027271	Inpp1
INPP4B_30845	TTTCAGGATGACTTTCCTGCGTTCTCCAGTGAAAGCGTGTGCGCCCAAGC	ENSMUST00000172167	Inpp4b
INPP4B_31932	CATTTGCCTGAGCTGCAGGAAGAAAATGCTGGCCTTCTTCTGATGTTCCT	ENSMUST00000172167	Inpp4b
INPP5D_30849	CCCATTGCCTCATAGGGTCATGGCTGGTGAGGTTCTTCAAGCATTTCATT	ENSMUST00000168783	Inpp5d
INS1_30990	GTTACTGGATGCCCACCAGCTTTATAGTCCAAAGTACCTCCTCTCTGCCC	ENSMUST00000039652	Ins1
INS2_29628	CCAGTGCCAAGGTCTGAAGGTCACCTGCTCCCGGGCCTCCACCCAGCTCC	ENSMUST00000105931	Ins2
INSIG1_31324	GGTTGATGCCAACGAACACGGCAATACAGCGCATAACGCTGGCCCATTCT	ENSMUST00000059155	Insig1
INSL3_29614	CGCGGACCCCAGAGCCAGGAGCATCAGTAGCAGCGGCGCGCGCATGGTGG	ENSMUST00000034261	Insl3
INTS3_31146	AAGACTCGTTTCTCCACAATGTGGTTGAGGGAAGAAAAGACACCCTGCCG	ENSMUST00000071488	Ints3
IPO13_30746	CACGTCCACCAGCTGGAAGTAGACTGGCCGGTACACCTGCTGGTACACAG	ENSMUST00000036156	Ipo13
IQGAP1_31135	CCGTCCCAAGCTCCGTTAGCTTCTTTAGGCCAGTCTGGATCTTCTCTTTC	ENSMUST00000167377	Iqgap1
IRF6_29460	AGCACATGGCCCTGACCAGTACACTTTGCACTGGCACAGCCTGATGGCAT	ENSMUST00000076521	Irf6
IRF7_29884	TGACCCAGGTCCATGAGGAAGTGTTCGATGTCTTCGTAGAGACTGTTGGT	ENSMUST00000097952	Irf7
IRG1_32231	GTTTCCTCCAGTGACCATAGAAGGTGTCAGAGCGCTCGGTGAAAGTGGTC	ENSMUST00000022722	Irg1
IRGM2_31291	CTTTGGCAGCAGTTTCATCAAGTATATCTTTCTGTTGTTTGCATCGACTG	ENSMUST00000209079	Irgm2
IRS1_32241	CTGAGTGGCCACAGCGTCTGATATTCATCAGCTGCAGCACCACAGCGGCT	ENSMUST00000069799	Irs1
ISG15_29722	GACCTCATAGATGTTGCTGTGGCCCCTTTCGTTCCTCACCAGGATGCTCA	ENSMUST00000085425	Isg15
ISG20_29849	TGGGCTCTGAGTCGCTGAGAGATTTTGTAGAGCTCCATTGTGGCCCTGGC	ENSMUST00000118867	Isg20
ISG20L2_31567	GCCTTCCGGTTGAGGAGTGGTATCCGGGAAGTGTCTCTGGTGAGGGACTT	ENSMUST00000055984	Isg20l2
ISOC1_29280	TTCGACTTCAGGTAACACCATAGAAAACTTGGTCTTTGGAAGAACCAGTT	ENSMUST00000025503	Isoc1
ITFG1_30888	AGGTGGCAACTATGGCGTCTTTGATTAGATTTAGGCCTGCTAGGTCCCAG	ENSMUST00000034140	Itfg1
ITGA2B_31302	GACGTCATTCCAGCTGACGACCGACGCCCCAAGTCCTTGCCCGGTCTTGA	ENSMUST00000103086	Itga2b
ITGA6_30482	CAAACATCGAGTCTTTGGTCCCATTTAGACGAATCGGCTTCACATTACTC	ENSMUST00000112101	Itga6
ITGAE_31885	AGAGCCATGTTTGTCATGTAGGAATCCTCTCCAGAGTTAGTCAGGCTGAT	ENSMUST00000006101	Itgae
ITGAE_32126	AATCACAACCAAGACCAGGAGGCCTCCGATGCTGCTGCCAATGATGAGAG	ENSMUST00000006101	Itgae
ITGAL_30744	ATTTCCTTGGAGAGTTCCACGGTCCCCGTCACTTGGATGAGGATCTCCCG	ENSMUST00000170971	Itgal
ITGB1_30461	ACAACATGCACGATAGCTTCATTGTTGCCATTCACTGAATAGGTGAAATA	ENSMUST00000090006	Itgb1
ITGB1BP1_31210	CCTCAGACACGGCCAGTTTCTCGATGGCACCAACATACTTTATTCGGAAC	ENSMUST00000076260	Itgb1bp1
ITGB1BP2_30753	CCCTGCCCTAGCCTTCTCAGCTAGTGAATCAGGGTGCTCCAGCTGGGCCC	ENSMUST00000033674	Itgb1bp2
ITGB2_30733	ACACACTGCCCACAGATGCAGTCCCCAAGCCCTGAGCACACGATGGAACT	ENSMUST00000000299	Itgb2
ITGB5_30516	TGGCAAACTCTCGGCGGTCGTGGATGGTGACGAGCAGCTTCCAGATGGCC	ENSMUST00000115028	Itgb5
ITIH1_29694	CCTTAAAGGTGTTCAGTTTGTGGTTAGCAATGCGCCCAGCCACCACAATC	ENSMUST00000006704	Itih1
ITPKC_29917	GGCCCTCAAAGTCTGCCAGGAGATCTTCCATCTGGTTGAAGGCCTGGCCA	ENSMUST00000003850	Itpkc
ITPR1_31692	GTTCTGACAGCTGGCCAGAAAGATTGGTGACCAGCTTCATGGTAGACTCC	ENSMUST00000032192	Itpr1
ITPR3_29815	GGTGTAGTCTGTCTTGTTCTTGACTCGGACCAGTACAATGAAGTACAGGT	ENSMUST00000049308	Itpr3
IYD_29824	CTTCCTCCTCTTCGATAATCTCTCTGATCTTATGCTTCATGTCTGGGTCC	ENSMUST00000019896	Iyd
JAK1_31221	CCTTATCGGTTTCAATTGCTTTGGTTAAACCAAAGTCTCCGATCTTCACT	ENSMUST00000102781	Jak1
JAK2_31096	CATCCTTCTGGCCTTGGCAATCTTCCGTTGCTCTTCAGTAGCTCTATCAA	ENSMUST00000065796	Jak2
JMJD6_30809	CTGACGAGCTGGAACTAGAGGAGCTAGAAGAGTCGCTGGAGCTGTCAGAG	ENSMUST00000047616	Jmjd6
JPH3_30910	GCGTATCCTGTGGACAGGCATCCATCCTCAGTAAGGGCTTCATCTCCAGC	ENSMUST00000026357	Jph3
JUN_29880	GTTGGCACCCACTGTTAACGTGGTTCATGACTTTCTGCTTAAGCTGTGCC	ENSMUST00000107094	Jun
KARS_31281	TTCAGCTCAGTATAGGCATTGCATATCTCCTTCTTCATGACAAACAGCTC	ENSMUST00000164470	Kars
KAT2A_31329	TAGCCAATGGCGTACTCGTCAGCATAGGTGAGAAAGTAAAGGATGCTGTG	ENSMUST00000006973	Kat2a
KAT6A_29325	GGATACTGTGCTGTCTGGTTCATGTAGGCAGGGTTACTATGGTAACTGCT	ENSMUST00000044331	Kat6a
KCNC2_31164	GGATCCTCACAAACCTAACCACCCTGAGAAAGCCGAGCACATCTTTGGCC	ENSMUST00000092175	Kcnc2
KCND2_30278	CCACACATCTGATCTGAATTGTACTGAGTTCTTGCACACTGCCTCTATGG	ENSMUST00000081542	Kcnd2
KCNG1_31013	CATGCCACTGAGCTGTGACTTGGTTTTGATGAGGTACTGAGCCCGGCGGA	ENSMUST00000109191	Kcng1
KCNK1_30362	ACGTAGAACATCTTCCTGAACTTCTTCAGCTCGTGGAGTTCACAGAAGGT	ENSMUST00000046765	Kcnk1
KCNK13_30559	GTCTCTATGGAGATGTTGCACCTGTTCCGGATGTTACCCGGCATCACCAC	ENSMUST00000160413	Kcnk13
KCNK2_31782	GAGCGTGAGAAGAAACGAAATCGCCGGAAGGAGAGGACACCAGCGGTGGC	ENSMUST00000110920	Kcnk2
KCNK2_32066	CTACTTCATGTTCTCAATGACAGCTATGTCCTCACCAGCACAGTGTGGTG	ENSMUST00000110920	Kcnk2
KCNK6_31144	AAGAAGAGCGCCGAGGCGAAGTCCCACGCAGGGTCCGAAGCGTTGGCAGC	ENSMUST00000085818	Kcnk6
KCNQ2_30826	TGTCAAAGTGGTCATTCTCACCCTTTTCTGCCAAGTACACCAGAAATGAG	ENSMUST00000149964	Kcnq2
KCTD10_29191	GCACTTCCATGCGTCCACTGAACATGGCCTTCAGCATGGTGTCCTGCTTG	ENSMUST00000102581	Kctd10
KCTD5_29252	CTGGTTGTGCCGTATGGAGTGTTGTGCAGCTCCTTGGAAACCACACAGAG	ENSMUST00000017090	Kctd5
KDELR2_31566	AGGTATCGTGATTTCCATCATAGGTGGCCTTAAATTTCATGTAGATCAGG	ENSMUST00000110731	Kdelr2
KDM1A_31777	ATCCCTTTGAGAATGGCCAGGCACCGGCCGACAATCACATCATCACTAAT	ENSMUST00000105847	Kdm1a
KDM3A_31100	AGTTTGGCAGTCTGGAAGCCAGGTTCAGTTTGCCATCTCGCCTGGTGTAC	ENSMUST00000065509	Kdm3a
KDM5A_30431	CTTGGCGTGCTTTATCTTGCCAACTCATGGCACGTTCTGTCAAACACTGC	ENSMUST00000005108	Kdm5a
KDM5B_30203	AAGCTTTCTCGTCCTCGATCATGATGGCCATGTCCTTCTGAACAGTTGAC	ENSMUST00000047714	Kdm5b
KDR_31683	GTGGTGTCTGTGTCATCTGAGTGATACCCAGACTGGTAGCCACTGGTCTG	ENSMUST00000113516	Kdr
KEAP1_31428	GGATGGTATTCATCGGTGTGATCATCCGCCACTCATTCCTCTCTGGATAG	ENSMUST00000194542	Keap1
KEG1_30252	CAGGTACAAGGCAAGAGGATTTGCCCCAGCAAGCCAACCATTCTCTGAAC	ENSMUST00000025598	Keg1
KIF11_29129	CTAGAGGTTTATGGAGGTGTGAAGCGGCAGTCTGCTCTTGGAGATGGAGA	ENSMUST00000012587	Kif11
KIF14_30385	ACGAGGCCACTGGATGCTGAAATCTTCTGTGAAGAAGAAACCTCCAGGCT	ENSMUST00000047817	Kif14
KIF18B_29552	CACTGCTCCTGCTCTGAAGCACTTTCTTCCACAATCTCCTGTCCCTGGGC	ENSMUST00000021311	Kif18b
KIF20A_31171	CCTGGATCTGCTCTTGGTAGAAAGTTGTCAGTGATTCCTTCAGGATCTTC	ENSMUST00000167161	Kif20a
KIF22_30176	CATGAGGCTGTAGACTCTCATTGGTGAAAGGCCGGTTAATCACCTCCTTG	ENSMUST00000032915	Kif22
KIF23_31277	CTACAGAAATGCTGCTGCAAGAGTTAGAGCGTCTGTGTAGCTGCGGCTGG	ENSMUST00000034815	Kif23
KIF26B_30540	TTCTCTTTGCGCTCATTGATAAGCTTGAACAGCCAAGAAATAGCACATGG	ENSMUST00000161017	Kif26b
KIF2C_31481	ATTCTGCTTTGTTCACAAAGGTCTCCAAGTCATAGTCTGGCTGATCTGTC	ENSMUST00000065896	Kif2c
KIF4_30222	TTCTGACGCTATAGACTTCAGTTCTGGGTGGTCAGAAGAAGAGACAAACA	ENSMUST00000048962	Kif4
KIF5A_31330	AACTGCGACCACCCAAAGGTGGAGTTTGGCTTAGGCTCACCTGGTTCCTT	ENSMUST00000099172	Kif5a
KIF5C_29811	TAGGAAAGAGAAGCTGACACAAACCCCATTCCCTCAAGCTCACATCTCTA	ENSMUST00000028102	Kif5c
KIT_30451	CTATGGAACTCTGAACCACCAGTTTTCCAAATGGTGACACAGATACATTC	ENSMUST00000144270	Kit
KLF2_30857	CTGGAGAAGGCCCGGTCGCACAAGTGGCACTGAAAGGGTCTGTGACCTGT	ENSMUST00000067912	Klf2
KLF4_29531	ACCTGGAAAAGGCCCTGTCACACTTCTGGCACTGAAAGGGCCGGTGCCCT	ENSMUST00000107619	Klf4
KLHDC2_30951	TGATTAACGCTGTGAAGTAAGTGTTTTGGAAGGCAGCTCCACGAGTTGGC	ENSMUST00000021362	Klhdc2
KLHDC8B_29625	AACACCTGCCAAGCAAAGGCCCGACCACCTCCTGCAGCCATGGTACTCGC	ENSMUST00000035232	Klhdc8b
KLHL13_29312	TCTCTAGAAGGTGATGGTGTGGCTTCTTCAGGTGGATAAACTGTAAGTGT	ENSMUST00000115313	Klhl13
KLHL14_29321	CACTGGACAGGTAACCGGTTTCGTTCCTCCCGCCGATCACATATAAATGC	ENSMUST00000122333	Klhl14
KLHL21_30190	GAGTCGGTGGCATGGTCATAGCGCTCCGTGCTGTCGGCTGCCACCACATA	ENSMUST00000097773	Klhl21
KLHL24_30498	AGCATTTCTCGGCTCTCCCTGTGGTCGTTACAGAACATGGCTCTGAAGTA	ENSMUST00000023509	Klhl24
KLHL41_31561	TTCAACTGAAGCTGAAAGACCATCTTCAGTGACACCTCCTGCGATCACAA	ENSMUST00000100050	Klhl41
KLHL9_29154	CTCCTCCTAAGGTAACCAAATGAGTAGAATCAGATCGAATGGCAGTTCTG	ENSMUST00000094993	Klhl9
KLK1B1_31141	CATAGCTGTAGTCGTCCTGAGGATTTTGGATGCGGTTCCGATGGAGGCTC	ENSMUST00000078835	Klk1b1
KLK1B11_31379	CGTAGTAACATCAGGTCATTGCTCTCATCGTCCTCAGGTTCTGGGTTGTG	ENSMUST00000007156	Klk1b11
KLKB1_29904	GCTCTTACATCACTGCTCTGTGTCTTCTCCAATATCCAGTCCATGTACTC	ENSMUST00000116473	Klkb1
KLRA8_30968	AGTTGAAATCCCTTTGCATGTTGCTGCAGTTATGGCGGTGGTTGAGAGTT	ENSMUST00000014476	Klra8
KLRB1A_29370	TGAATGAGCATCAAAGTGGCTCCTTTTCCATCACAATCAACTAGACCTTC	ENSMUST00000032512	Klrb1a
KNG1_29440	GTGCTTGATCTCACAATCTTCTGCCAGCTCTGTGTTACTTTCCTTGGAGC	ENSMUST00000039492	Kng1
KNTC1_30246	ATGAGCGTCAGGCAGGTCAGAGCAAAAGCGGGAAGGTCTAACTGGACGTA	ENSMUST00000031366	Kntc1
KPNB1_31314	GCCACCTCTGCTGGTATTGTGCCTTGATATCTGGATCTTTCGATGTCAAA	ENSMUST00000001479	Kpnb1
KRT1_29557	CAGCTCCTGGAAGTCACGCAGCAATCTGGCAAGATCCTCCTTGCATTGCG	ENSMUST00000023790	Krt1
KRT18_29525	AACAGAAGTTCTTCCTTGAGTGCCTCGATTTCTGTCTCCAGCTGCAGCCT	ENSMUST00000023803	Krt18
KRT19_31045	ACCTTGTCCAAGTAGGAGGCGAGACGATCATTGAGGTTTTGCATGGTGAT	ENSMUST00000007317	Krt19
KRT4_31780	TCTTGGTGATGGTGGCGGAAGAGGTGATCTTGGAACCAGAACCGCCATAA	ENSMUST00000023797	Krt4
KRT7_30903	CGATCTCAATGTCCAGCGCCAGCTTGGTGTTCAGGAGCTCCTGGTACTCT	ENSMUST00000068904	Krt7
KRT8_31071	CATCAGAAGACTCGGACACCAGCTTCCCATCTCGGGTTTCAATCTTCTTC	ENSMUST00000023952	Krt8
L1CAM_30833	GTGGTCTTCAGCAGGGCTCCAAGACAAGTGCACCTGGCTCTGCTTCAGCA	ENSMUST00000102871	L1cam
LAMA2_31739	TTCCATCAAAGTAAGTCCCACTCTCTGCATTCGCAAAGCATGTCCCAACG	ENSMUST00000092639	Lama2
LAMA2_32272	GGTTCCATCAAAGTAAGTCCCACTCTCTGCATTCGCAAAGCATGTCCCAA	ENSMUST00000092639	Lama2
LAMA3_29807	GTGCCATTGTCCATCACACAGAGATCTCTTCGGTGTAATTGATGTCACGG	ENSMUST00000092070	Lama3
LAMB1_31042	AAGGCTCTCTGCTTCTGCCTGCAGTGCGCCGAGCTCTCCAGCTGTGCTGT	ENSMUST00000169088	Lamb1
LAMP1_29317	AAGATGTGTTCCTCAGTGTTGCACTTGTATGAGTTTCCCACAGTGGCCTG	ENSMUST00000033824	Lamp1
LAMP3_29243	GCAATTGAGCCAGAGCCAATGGTATCGTCAGTAGATGAAGCAGTCATGTG	ENSMUST00000081880	Lamp3
LAMP5_29994	GCAGGAGCTGTCCACGCTGAGAGTTCTGGAAATAACGAGGTTGTGTTTCA	ENSMUST00000057503	Lamp5
LAP3_30802	CATCACTCCTGCTATGTCTAAGTGTGCCCACTTCGTATGTGTCACAAACT	ENSMUST00000046122	Lap3
LAPTM5_29040	TTCGGAGGCTCTGAGTAAGGAGTCTTGGGCCCACAGCAGAACAAAAAAGA	ENSMUST00000151698	Laptm5
LARS_30576	GGTAGACTATATTCTCCATAAGCACTGCCTGCTCATCAAACTCCAGCTCT	ENSMUST00000097590	Lars
LAT_31673	GGGCTCAAGGCGTCTGCTTCCATCTGCAGAGCACCTGCCACAGGCCCTGC	ENSMUST00000032997	Lat
LBR_31327	TCCTCAGACTCTATTTCTTTGGCTTTGACCTCTTCTCTCCTGGGACGAAG	ENSMUST00000005003	Lbr
LCAT_30583	GAGTGCGGTAGGCACCCAGTAGGATGGCATTGATATGCTCCAGTGTCTTA	ENSMUST00000038896	Lcat
LCN2_30771	CTGACCAGGATGGAGGTGACATTGTAGCTATTGTTCTCTTGTAGCTCATA	ENSMUST00000050785	Lcn2
LCP1_30378	AGCAAACAACCCAATCTTGATGACTTGCCACAAAAGTCCCAGGACCAGGT	ENSMUST00000145303	Lcp1
LDLR_30685	AGCTCGTCCTCTGTGGTCTTCTGGTAGACTGGGTTGTCAAAGTTTATGCT	ENSMUST00000034713	Ldlr
LECT2_29832	GAGTACTGTCCACAGCCATAGCTGTCACACGTCCGGATCTCGTTGGAAGA	ENSMUST00000062806	Lect2
LEF1_29436	AGGAGCGAGAGGAGTCTTCCACAATTCTCACACCAGGATACCCGCTCTGG	ENSMUST00000029611	Lef1
LEPREL2_31717	ATGTTCCTGATATCCTCCAGAGCCTTCTCATCAGTTCCTTCCCAAGTTGA	LEPREL2	Leprel2
LGALS1_29720	TCCTTGGTGTTACACACAATGGTGTTGGCGTCTCCATGGGCATTGAAGCG	ENSMUST00000089377	Lgals1
LGALS8_29605	ATTGATATTGTTGATTGGAGTCTCTCTTCCGTATACACACTTTACCCACT	ENSMUST00000143693	Lgals8
LGALS8_31872	CGACTGATAGTGTATCAATACTGCTTAGGTCTTTAAATCTGTGTTTGTAC	ENSMUST00000143693	Lgals8
LGMN_31157	CCAGAAATTGCTGGATCTGCCCAATGAGATTCTGGGATTCCTTCACGTCG	ENSMUST00000021607	Lgmn
LHB_30045	CGGCACAGATGCTGGTGGTGAAGGTGATGCAGACTGGGCAGAACTCATTC	ENSMUST00000072453	Lhb
LHCGR_29218	TTCTGTAAAGTTCAGCCCGGTGCTTACAGCAACCAAATCTGCTCAGCAAG	ENSMUST00000024916	Lhcgr
LHFP_30756	ATCACCATCATCTGCCGACTCTCATCGTGAACAGGATAGGAGCACCTCCG	ENSMUST00000059562	Lhfp
LHX8_30328	ATGCCACCAGTGTGTCTTGTTCCAAAAAGGCCACAGTGACCGTAACCACT	ENSMUST00000177846	Lhx8
LHX8_31892	CCGTTCTCCACTTCTCTCTTCAGATTGTCCAGCATGCAGTCAAAGTGCAC	ENSMUST00000177846	Lhx8
LIG1_29706	CGGTGTCCTTGGTGTCCAAAGAGGTGGTGAAGACAAACTCACCCTCTGTC	ENSMUST00000177588	Lig1
LILRB4A_31543	GCCTGCATATGAGGTTGTCATGCTTGGAATGTTGAACTTGGCCTTATTCC	ENSMUST00000105481	Lilrb4a
LIPA_30123	GGAGGAAGCCCAAGCTGCTGTTGTCAATGTTTGTGACCCAGTTACTAGAA	ENSMUST00000049572	Lipa
LIPC_30307	ACACATTGGCCCACACTGCACTGTTTTCCCACTTGAACTTGAGCAGGATC	ENSMUST00000034731	Lipc
LMNB1_30463	GGTCCCTGATCTCCGCCATCTCTCTCTCTCTGTCAGACAGCATGCGGCGC	ENSMUST00000025486	Lmnb1
LMOD2_29135	ACGTTTACGCTGGTAATGTGCTCGTTAACCTTGAGCATGTCTGCAATGGC	ENSMUST00000031694	Lmod2
LMOD3_30784	AGTTGCTGCTGCTGCTGTTCCTCCTGTCGTTTCTGCCTCCGTTTATCCTG	ENSMUST00000095655	Lmod3
LOC100038947_31371	CCACCTCCAGACTGAATCTCAATGTCAGGCTCTGATGATCCTCTCTGGAA	LOC100038947	Loc100038947
LOC100042413_31163	GGAATCATGTGGAGGTTACCTTCCTTGTAGTCATCCAGGAGCTGATAAGC	LOC100042413	Loc100042413
LOC100504120_31209	GGCCTAGTCACCTCTGCTTCAGGCTGGAGCAGTACAGAAGCACCTTGCAA	LOC100504120	Loc100504120
LOC100504837_29403	GCCATCTTCACCTGGAAAGCTTGTTTTGTGTAATAATTTGCTTTCCGAAC	LOC100504837	Loc100504837
LOC100504952_30390	AAGACTCTGTGCCCTGAAGAAATCTGGTTTATCAGCAGGAATGTTGACTG	LOC100504952	Loc100504952
LOC100504959_30387	CCAGGCAAGCTTGAATAATGAAGGTGCAGGTGAGTCGTCTTCCTCGCTTG	LOC100504959	Loc100504959
LOC100504991_29943	AAGGCGAGAAACCCAGACACGTAATTGGCAATCAGTACGTGATAGTCAGT	LOC100504991	Loc100504991
LOC100505067_29282	TGCCAGGTCAGTTACATGTATGGATAAGCAAGATTAGCCATAACATTCAC	LOC100505067	Loc100505067
LOC100505173_29225	GTCCTTCCAAAGCAGAGGCACCTGTCACGTGATCTATAAAGTCAGCCACA	LOC100505173	Loc100505173
LOC100505208_30153	GTCACTCGTGGCAAAGCCTGACCGCGGCGTCTCCGGCTGCCTGGCTGGGA	LOC100505208	Loc100505208
LOC381765_31360	TGGCAGCGGAAGTGGTTGCGAGGATTGTGCCAGAAGGTAGCAGAGACCCT	LOC381765	Loc381765
LOC552876_31041	TGGCCCATTTAAACCAGGTAAACGTTAACTACATCACTTCTAACCATGTC	LOC552876	Loc552876
LOC552908_30443	TGGAAGCTTAGTTTAGTGTGGTCTTTTCTTTCCTTTTCCCATTGTTCCAG	LOC552908	Loc552908
LOC665506_31202	GGTTTCGAGGATTGTGCCAGAAGGTAGCAGAGACCCTCAGGCGGCTGCTC	LOC665506	Loc665506
LOC68395_30716	CCCTCATGGTTCACATGGCATGTGTAATTCTGCTCCTTCCCAAGAGGCAC	LOC68395	Loc68395
LOCKD_31228	CCGCCTGTACCTTCCTAGTACCTCTGGCCAGCAGCCTGTGTGCCCGTGCT	ENSMUST00000185152	Lockd
LOX_31402	GATGTCCCTTGGTTCTTCACTCTTTGCGGAAATCGTAGCAGTACCCTGTG	ENSMUST00000171470	Lox
LOXL1_31479	TGGCCTTGTGTCCCTCGGCTACCTTCTTGCCCGTGGATGCATCAAGCAGG	ENSMUST00000061799	Loxl1
LOXL3_31159	GGTGTCATTGGCACGATAGAACTCTAGAGAGCAAAGGGAGAGGTGGGCTT	ENSMUST00000101257	Loxl3
LPAR2_32211	TTCCCAACTAGCTCGTACAACTTCTACTAACACATTTATATTATTCCATG	ENSMUST00000164890	Lpar2
LPAR4_31456	CAATCTGAGACAATGTTGCAGGCTTGCGGAGGGTTCTAAGCACCACAGAA	ENSMUST00000060576	Lpar4
LPGAT1_30296	GATCCAGGTCTGAATGTCTATTGGTTCAGCTTTGGGATAAGCTATGGTTG	ENSMUST00000110855	Lpgat1
LPIN1_31736	GCTGAGGCTGAATGCATGTCCTGGTTTTCAAAAGGTGGCAGTGGCTCTCT	ENSMUST00000067124	Lpin1
LPL_31494	TAGGAGGAGAAATCGAGAGTCTGACACTGTTTCCACTGCACAGCTGTTTA	ENSMUST00000015712	Lpl
LRAT_29065	AGTCCTCTACTGTGTCCACACGGATGCTAGCCACCTTGCAAATGACTCCC	ENSMUST00000029632	Lrat
LRG1_29971	GCGCGTGTCGTTCTGTGAGAACATCTTGTTTCGGTTGGCGACCAGCCAGC	ENSMUST00000041357	Lrg1
LRP6_29998	CCTCCAACTACAATCGTTGCATTCTCTTTGCCATTTGTAGCATCAACCAA	ENSMUST00000032322	Lrp6
LRPAP1_30340	TCTCTTCGAGGCGCCATCTTCCTCTGAAGCGCTAGCAGACTGACAGGACT	ENSMUST00000030986	Lrpap1
LRR1_30422	TTCCGTTCTTCCCATACTATCTACTAAGACCACAGTGTGCGCAACAGAGT	ENSMUST00000110621	Lrr1
LRRC16A_30234	TGCCTCTTCTCCAGAGTCACTGCATTTGCTCCCTTGGTGACCATCTTTGC	ENSMUST00000072889	Lrrc16a
LRRC41_31413	GCTTAGGCTGTGAGGCTGAGCTAGCTGGAGCCCGTTTGGATGATGTGGAA	ENSMUST00000030471	Lrrc41
LSAMP_31051	GTGTAGGATCCTTCATCATAGACATCCACCTTCTGGATTCGGAGGCTGTA	ENSMUST00000187695	Lsamp
LSAMP_31986	TGGTGTCAGCACAGAGAGCCCTCTTTTTCCTCGAGCTCTCCCGCTCTCTT	ENSMUST00000187695	Lsamp
LSM2_29664	AGCCAGTCCAGGACCATTCTGCAGTTCCTGGCTCTCTTACCCTCCCTTCT	ENSMUST00000173004	Lsm2
LSM3_30868	CTTCATATGTCTCCTCATCAATCTCTATCGTTGTCACAGTTTCTTCTACA	ENSMUST00000040607	Lsm3
LSM5_30492	GTCCCGACAATTTCTTTATCACTCTTCATCACAATGTGAATTCTTGACCC	ENSMUST00000170382	Lsm5
LSM5_31950	CTGTGACATCTTCCAACACCATATTGACAAAGTCATCAAATCCTAGAAGT	ENSMUST00000170382	Lsm5
LSM6_30573	TTGCAGCCGGATCCAGAACGCTCACAGGCCGGGCTTCCGCGGACGCGCGC	ENSMUST00000130325	Lsm6
LSR_30666	TTTAAAGCCTCTTCTAAGAGTCGCCCATCATACTGAGGGTCCCGTGACCT	ENSMUST00000108116	Lsr
LSS_31472	TCTGGGAAGTGTTCATGGAAATGCTTCAGTGCCTGCATCACAGCGGAGGT	ENSMUST00000048678	Lss
LTB_30626	TGGCAGCTGTTGAACCCCTGGATCTGGTGTAGAATCCGCAGCTGGAGACA	ENSMUST00000025262	Ltb
LTBR_30584	CTGTCTCGGCCAGATGCCAAGCTTTGCCATCCTCCTGGTAGGGTGTAGAC	ENSMUST00000032489	Ltbr
LUM_29826	AGAGGATTGCCATCCAAGCGCAGATGCTTGATCTTGGAGTAAGACAGTGG	ENSMUST00000038160	Lum
LUZP4_30415	TGTGACTGGTTGTCATGACCTCTCTGTGACTGGTTGTTCTGACCTCTCCA	ENSMUST00000101185	Luzp4
LY6C1_31621	CCACCACAAGCAGGGTCTCCTTGGAAGTGCCCTGTGCTGATGTGTGCTTG	ENSMUST00000188845	Ly6c1
LY6C1_31947	TCTCCCTGATGTTAGGATCCCTGATTGGCACACCAGCAGGGCAGAAAGAA	ENSMUST00000188845	Ly6c1
LY6C2_31304	GTCCTCTCCCTGATGTTAGGATCCTTGATTGGCACACCAGCAGGGCAGAA	ENSMUST00000100542	Ly6c2
LY86_29208	AGGAGGAGGTGACAGTGGCATTGGCACAAGCCACAGTAGCACGGTTTTCA	ENSMUST00000021860	Ly86
LYN_29549	AAGTCATCCAGGACACTCTGTAAGTAGTCAAAAGTTGGCCTCTCCTCTGC	ENSMUST00000041377	Lyn
LYPLA1_29556	CCGAAGTGGAAGCCAGCAACTGAGTGCAGTGACACCAGCCAGTTTCTGCT	ENSMUST00000027036	Lypla1
LYPLA1_32076	AATCAATTGGAGGTAGGAGCTTATCAATGAAGTGCTTGACATCCATCATT	ENSMUST00000027036	Lypla1
LYRM1_29876	CTGGCTTCCTTTAGTATGTACTGTTTTTCTTCGATGGTGTCTTCCATCTG	ENSMUST00000208424	Lyrm1
LYZ2_31340	AGAGTTCTGGCAAACTCACAACGTTCATAGACCTTGGCCTGAGCAGTGAC	ENSMUST00000092163	Lyz2
MAB21L2_30993	TTCTGCGGAGCTCTGCTTGCCAGTCAGCGAGTAGCACTCCTTGGAGAGCA	ENSMUST00000077524	Mab21l2
MAFF_30224	TGCTTCTGCAGCTCCTCCTTCTGGCACACGCGCTTCACGCGGCAGCTGGC	ENSMUST00000096350	Maff
MAGED1_30281	CGCCTAATATACCACCCACCGCCTCTGGACGCGCCGCGCATGCGCAGCAG	ENSMUST00000026142	Maged1
MAGOH_30690	AGGAGGACGGAACTTTAGGAACGGATGACACTACCACGGCCTGCGGTCTA	ENSMUST00000030348	Magoh
MALT1_30810	TCTCAGGTGGTTTGTGGACTATACTTGTGTAGATTATCATGACATTGGAG	ENSMUST00000049248	Malt1
MAN2B1_29315	AGGCCAGGAAGGTACGTATTTCCATAGGCTTCAGTGTGACTGAGGTAGGG	ENSMUST00000034121	Man2b1
MAOA_30665	TGGCAGGCATTGACCCATCTGGTTTAGTGTCATCCAGAGTGATTGAAATT	ENSMUST00000026013	Maoa
MAOB_29547	AACCAAGAGCTGTTGCTGACAAGATGGTGGTCAATCCAAACAGCTTTAGC	ENSMUST00000040820	Maob
MAP1LC3A_30640	GGAAAACCCGCCTGCCTGGACCTGTGACGCCACGGCGCAGACAGCCCGGA	ENSMUST00000029128	Map1lc3a
MAP2_31035	CTGCCTCTGTGAGTGAGGCTGATGTCCAGTGTGGTGCCTTTCCTTCATCT	ENSMUST00000114017	Map2
MAP2K5_31654	ACAGAACCCACAAGCATTCTGTAGTCCTTGTGAGTAAGAGGAGACAGCGG	ENSMUST00000034920	Map2k5
MAP3K4_29253	GTATATAACCTGATGACGTGCTCCTGCAGGCCCAGTCGTGACACCTCCTC	ENSMUST00000089058	Map3k4
MAP4K4_31738	CCCGCACAGGATCCATAGATCACTTTCAACCTCTGGCCTTCCTCCACAGT	ENSMUST00000195860	Map4k4
MAP7_30774	TGATTGCTGTAAAGCGACTCCATGTGGGCTCTCTGCAGACTCTCCGTTTC	ENSMUST00000020173	Map7
MAPK1_29588	AGCCTTCTGTGTGGCTGTTCAAGGTTATATGGAGCTCTGCCCTGAACATC	ENSMUST00000023462	Mapk1
MAPK1_31933	CTGAATGGATATACTTTAGCCCTCTCAGGATCTGATAAAGAAAATAGCAG	ENSMUST00000023462	Mapk1
MAPK10_31603	TGGTACAGCAAGTAAGACATCCGCTCGTGGTCCAGCTCCATCTGAATCAC	ENSMUST00000133069	Mapk10
MAPK13_30752	TGCTTCAAGAGCAGAAGCTCGCGGTAAGCGCGCTTGGCAAAGATCTCCGA	ENSMUST00000004986	Mapk13
MAPK14_30436	CCGCTTGGGCTCCAGTGGCGGCGATCCCACAGGCAGCGGCCGGGAGCCTC	ENSMUST00000114754	Mapk14
MAPK14_31848	GCAGACGCAACTCTCGGTAGGTCCTTTTGGCGTGAATGATGGACTGAAAC	ENSMUST00000114754	Mapk14
MAPK1IP1L_31436	TGGAGGAGGAACAGTGGGATATGGCCCTGGAGATCGATATGGCATGTTAG	ENSMUST00000166743	Mapk1ip1l
MAPK3_31707	GCGTTACATGTGGCAGCTTGAGAGAGAGAGGGTTAGGCCTGGGCTCCTCA	ENSMUST00000057669	Mapk3
MAPK9_30619	TCCACATAATTCCTTACAGTTGGCTGAAGTTTCTTCATGAACTCTGCGGA	ENSMUST00000109179	Mapk9
MAPKAPK2_30399	AGAGGGTTGGATGCGTCTTCTATCTTCTTTATCTTGATCTGCTCATAGTC	ENSMUST00000016672	Mapkapk2
MAPKAPK3_29451	GGTAGCACTCCAGTACCTTGCCGTTCACACCCAGACCCAGCACTTGCTTG	ENSMUST00000192054	Mapkapk3
MAPKAPK5_29487	CAGAGCATCCCTCAGGAGCTTGCATTCGCGGTTGTACTTCCAGGCCTCCT	ENSMUST00000111782	Mapkapk5
MAPT_30629	TTGAGGAACCCGACTGACTGGCCTCCCGGGCAGGCCGGCTGCAGGTTGCT	ENSMUST00000106988	Mapt
MAPT_32077	GCTAGTGTGGCAAGCTGTGGTGAGTCCACCATGTCGATGCTGCCCGTGGA	ENSMUST00000106988	Mapt
MAST2_29410	GGTCTTGTTCGTGGATGCTCTGTCTGGACCCTCAATAAGGAATTTCCAGG	ENSMUST00000106484	Mast2
MAT1A_32239	CCTCTAGCAGCTCCCGCTCAGTCTTATTGGAGGTCCCGTAGGTGAAGATG	ENSMUST00000047286	Mat1a
MAT2A_29960	ACAACAGCCTTGATCACTTTCTCCTTCAGAGCATCCCTCATCTCATCAAG	ENSMUST00000059472	Mat2a
MBL1_31563	ATGAACTGCCCTTCAGTCGCCTCGTCCGTGATGCCTAGGAAGGCAATGCC	ENSMUST00000047095	Mbl1
MBL2_30111	CTCTGTTTCCTGTCAGATCCTCAAAACTGCCTTCAACCCTCACATCTGTG	ENSMUST00000025797	Mbl2
MBNL1_30670	CTTGCAGTAAACTTGGAAGTATGGAAAGTTCTATAACAGAACTCTCACTT	ENSMUST00000192807	Mbnl1
MBNL2_30289	AAACTTGCATTCTTCGTCGGAGCGTGAGCACGTTCCTCTCTGGTACTGTC	ENSMUST00000088419	Mbnl2
MBOAT2_31361	GTGTGCTCGTTCTTCTTTGAGACTTTTTCACAGGCAGCAACAGCAACACC	ENSMUST00000110942	Mboat2
MBOAT7_31004	TCACGGCTCGGAATTAGATGCGTTTACAAACTCGGCCGGATGTAGGCGGG	ENSMUST00000038608	Mboat7
MBP_31341	GCCTTGCCAGTTATTCTTTGGGTCTGCTGTGTGCTTGGAGTCTGTCACCG	ENSMUST00000047865	Mbp
MBP_31982	TGGTACTTGCTGTGGCCAGGTACTTGGATCGCTGTGAGGGTCTCTTCTGT	ENSMUST00000047865	Mbp
MBTPS1_30831	TCTGTCTGTGACTGTCATCCAAGCAGTTGGAGTCTCCATACAGCACGATC	ENSMUST00000098362	Mbtps1
MBTPS2_31705	ATAGCTGCTATACCGTGTCCAATTTCATGTACAACACCACTAATGAGGAC	ENSMUST00000112522	Mbtps2
MCL1_31594	TCCCGTTTCGTCCTTACAAGAACATCTGTGATAGTTTCTGCTAATGGTTC	ENSMUST00000178686	Mcl1
MCM10_30477	TAACTGCACATTTGTCCACCACTGTGTGCTTGTTATAAGGATCCTCTTCA	ENSMUST00000102985	Mcm10
MCM10_31918	TTGATCTCGAAGAAGAGGAGTGGTTAGGCTCTAGAAAACTGGAAGAAACC	ENSMUST00000102985	Mcm10
MCM2_29214	CGGTTGCGTTGATATGTCACCTGCTCAGCCACCAACTGCTTCAGTATGAA	ENSMUST00000058011	Mcm2
MCM3_30407	GGAAGACGATGCCCTCAGACACCATGACCTGGTTATCATCCTGCATCCGG	ENSMUST00000053266	Mcm3
MCM4_29116	TTGTCAGAGAAGAATGATCGGTTGTGGATCAGTGCCATGCTGTGGGTAGT	ENSMUST00000023353	Mcm4
MCM5_31025	GACAGATTGCCAGACAAAGCAGCATCCAGTGTGGACACCTGGAACAGTCT	ENSMUST00000164309	Mcm5
MCM6_29352	CCCTCATCCGTCTCCATCTGGATCTCTTCCTCTTGATCTAGATTGACATC	ENSMUST00000027601	Mcm6
MCM7_31665	TCAGACAAAGGTGATCCGTGTCCGAGAAGTATTAACCTGCCAGACATTTA	ENSMUST00000148879	Mcm7
MCM8_29446	TAACCGCTTTCTGCTTCCCAGCTCTTATCGCGATCACATGTTCAGAAAGT	ENSMUST00000028831	Mcm8
MCOLN1_30982	GGTGTCATAGGCGCCGGTGATGAGTGCAATGAAGAGGCTCAGCACCATGT	ENSMUST00000004683	Mcoln1
MCUR1_30741	CTGACCATGTCTTTGTAGATGATGTTCATGTTGGTCTCTGTGATCTTGAC	ENSMUST00000021800	Mcur1
MDM2_29942	TCGTGCCCTTCGTCACTCAGGCTGTAATCTTCCGAGTCCAGAGACTCAAC	ENSMUST00000020408	Mdm2
ME1_30135	GACATGAGCACGCTGTAGAAGAGCTTCTCATTTCTGTCTTGCAGGTCCAT	ENSMUST00000034989	Me1
ME2_30065	ACTCGGCCTGTGCTGTAGGATTACTTAGAGCAAATATTATAGGTCTCTCG	ENSMUST00000025439	Me2
MEF2C_30226	TAGGTGCTGCTGCTGCCAGCCAGTTACAGAGCCGAGGTGGAGCGCACTGG	ENSMUST00000199210	Mef2c
MEIS2_31424	CCATCAGTCTGCGCTCCAATAAACTCCTGGATGTGTCGTATATTTAATAT	ENSMUST00000110907	Meis2
MEIS2_31840	GTCGGCGAGATTTGTGGAGGAGCCTGAAAGTTCTTCATGATCTGACTTGG	ENSMUST00000110907	Meis2
MELK_30601	GCCAGACAAGATATCTTCCACTAATCTCTTGTAAACCCAGGCATCACCCT	ENSMUST00000045607	Melk
MEST_29181	CCATATATGCATTCAAGAAGCCCATGGGATCCTCTAGCTGTGGGTAGTGG	ENSMUST00000124665	Mest
MET_31230	AGCTAAGTCTCTGTGGACAAACTTTTTGCTGGCAAGATATTTCATGCCTT	ENSMUST00000115443	Met
METRN_29056	CCCTTCCTTGAACAGTGGCAGTGTCTGGCGGATGACACGAGCAACCACCA	ENSMUST00000002344	Metrn
MEX3B_30578	TCACTCTCGAAGCACACAGAGCAGTCGCGGCTGCCTTTGCGCCTCAGCCC	ENSMUST00000082237	Mex3b
MEX3D_29234	ATCCCAGTCACAGCGAACACTGGTTCCTTGTCGCGCCCGGGAGTCACGAT	ENSMUST00000105350	Mex3d
MFSD10_30558	TGATGTGCCAGGAAGCTGAGTGTGTACTCCAGGCCTGAGAACAGGAAGAG	ENSMUST00000001109	Mfsd10
MICALL1_30268	CTGCATCTTTAGCTTCTGCCGCCGCTGGCTGCTGCCTTTGCTGTGAAAGG	ENSMUST00000040320	Micall1
MIF_30987	TTGGTGTTCACGATGAACATAGGCATGGTGGCGGAGAGACTGCGAGCGTG	ENSMUST00000038169	Mif
MIP_29538	GGCCATTCCGCCTCTCGTCGTATGTAGCAAAGATGCAGAGCACGAACTGG	ENSMUST00000026455	Mip
MIS18A_31724	CTTTCAACGGCTTCAACGCTGAGGCAGAACAAGTCGCGCTTGTAGTCCAG	ENSMUST00000099554	Mis18a
MKI67_30147	CTTCTCATCTGTTGCTTCCTGCTTTGGTGCTAAAGAGCGCAAAGCCCTGG	ENSMUST00000033310	Mki67
MKNK1_30523	AGGTCTTTGGCCTCGTTGGAGATGTGAGCCCAGTCTTTGTCAGGAAACTC	ENSMUST00000106513	Mknk1
MLEC_30880	ACCCTGTTCTTGTTGGTCTGTCTTTTGAGATTAGACCCCTCATCATATTC	ENSMUST00000112121	Mlec
MLLT11_29387	GTCCCAGATGCCTGCCCGTTCATTTTGCCAACGCTGCTGCTATCCTTGCT	ENSMUST00000198948	Mllt11
MMP12_31440	AGACAAGGAGGGTCATCTGTGGCTTTTGATTGGCAGGCAGCAAAGTATGG	ENSMUST00000065079	Mmp12
MMP12_31879	CACATCACTCCAGACTTGGAAAGCTTTCTGAAATATGTAGTCTACATCCT	ENSMUST00000065079	Mmp12
MMP14_31294	GGCAGTAAAGCAGTCGCTTGGGCGTCCCATGGCGTCTGAAGAAGAAGACA	ENSMUST00000089688	Mmp14
MMP1A_29320	CAGCGTCAAGTTTAACTGGAAGATTTGGCCAGAGAATACCTATTAAATTG	ENSMUST00000034492	Mmp1a
MMP2_30077	ATTTGATGCTTCCAAACTTCACGCTCTTGAGACTTTGGTTCTCCAGCTTC	ENSMUST00000034187	Mmp2
MMP9_29462	CCTGGATCTCAGCAATAGCATCAAAAACATCCACATTGCAAGGATTGTCT	ENSMUST00000017881	Mmp9
MNAT1_31677	TGCCAGAAGAGCCCACTGAACGCATCCTGTAGCGCTCTGTGACAAGCAAG	ENSMUST00000021523	Mnat1
MNAT1_31890	AGCCTGCTGCAGCTCTTCTTCCTTTTGTATGAACAGCCGTCGCTGCTCAT	ENSMUST00000021523	Mnat1
MOB1A_30692	CTCTCCCTCAGGCAACATAACAGCTTGCCTCAGATTGCCACTTCCGAGAG	ENSMUST00000055261	Mob1a
MOG_30319	TTCAACTCCATTGCTGCCTCTTCTTGGTAAGAGTGGTCTCTGAAGAAGCA	ENSMUST00000102665	Mog
MORF4L2_31902	GGCGCCCCATAGATCTGCGACATCGGCGCATCAGGGTGAGCCAGCAGAAT	ENSMUST00000033797	Morf4l2
MORF4L2_32178	TGCTAGCAACCTGCTTCTTCATGCTTAGGGCCGACTGCAAACCAATTAGC	ENSMUST00000033797	Morf4l2
MPC2_29526	CCTGTAGCCATCAACACAGTGGACTGAGCTGTGCTGAGTTTCTCTGCAGG	ENSMUST00000027853	Mpc2
MPEG1_30130	GTTGCTAAGCTTCCAACCAAACTCTCCTGCTCCTCAATTTCCTGGTATTC	ENSMUST00000081035	Mpeg1
MPI_29742	AGGTATGATAGCTGTCACTGTCCCTTGGACCATCAGAAGGATGCTGGCAG	ENSMUST00000034856	Mpi
MPZL1_29866	GATGTCCGCATACACAACCGACTCTGACTTATTAATCTTGCCGCTGTGGT	ENSMUST00000111435	Mpzl1
MRPL12_31646	GGCTAGCCGCCACCGGCAGCATAGCTCCGCAAGCGGGAAGGTCACACGCG	ENSMUST00000043627	Mrpl12
MRPL13_30221	ATGAAGGTTCCTACTGCCGTCGCGTGCGCTCATCTGCTTCCCCGCCACAC	ENSMUST00000172387	Mrpl13
MRPL19_30369	ATGCGAAGGCAGCAAGCCGTGGCCTGGCCATTCGGACGCTCCGGGCCAGG	ENSMUST00000032124	Mrpl19
MRPS16_29202	CAGGTTGAGGGCAACTAGTTTTTCTCCGTGACTGTTGGGTAGTGGATCAT	ENSMUST00000061444	Mrps16
MRPS17_29337	TCATGGCTGTACCAATCACCTTCCCCACAACCCATTTGGCGTGGACGGAT	ENSMUST00000119576	Mrps17
MRPS18B_30024	CAATGGAGGATTCTGCTGGTGGTGTAGTGGGCATCTCTGGCATCGACTCA	ENSMUST00000025305	Mrps18b
MRPS2_31179	GTGCAGAAAGATGATGAGGTCTGGTAGGCGGACTGAAGGCCCAAAGAGGA	ENSMUST00000038600	Mrps2
MRPS34_30259	GTGAACGCAGTGAAGGCCTCCTCCTCGTGCTTGGGTACCAAACGCCAATC	ENSMUST00000043907	Mrps34
MRPS6_29401	CACGCTCACCCAGGCTTTCCAAGTTCCTCACTATGGCTCCTCGGTCCATC	ENSMUST00000047429	Mrps6
MS4A1_29845	AGACCAGACCTGGAGTGGTACCTCTGATTGACACCACGTGACAGGAAATT	ENSMUST00000169159	Ms4a1
MSH6_29406	GCAAGCCTTGCTGCATTAAAGCCATAGCTCTTAGGACAAGCTCCCTTAAT	ENSMUST00000005503	Msh6
MSN_30800	CCAGTCGCATGTTCTCAGCATGGATCATGTCATTGGCAGTCTTCTTGGAC	ENSMUST00000117399	Msn
MSRA_31421	ATTCTCCCAGAAGACCTTGAGCAGTTCCTCAAAGCTGATGTGCTCTGGCC	ENSMUST00000067927	Msra
MT1_29726	GTGAGGAGAAGGTACTCAGGACGTTGAAGTCGTGGTGACGCTTAGAGGAC	ENSMUST00000034215	Mt1
MT2_29727	TTGAAGATCGACGAGAGATCGGTTTGAAGAGTTCTAGGAGCGTGATGGAG	ENSMUST00000034214	Mt2
MTA1_30728	TCTCTCCATCTAACCGGGTTGGCATTTTCAAGCCACCATATTTCTTCCAA	ENSMUST00000009099	Mta1
MTAP1A_32255	TGAGTAAGTACCACTCTGTAGGATAAGGTCTCCCTCGGGTTCTAAAGTTT	MTAP1A	Mtap1a
MTERFD1_29894	GCAGAGTGCTTTCGGCAGAACTCTTTGTCCTATTTGTGCTGGCAGAATGG	MTERFD1	Mterfd1
MTF2_31844	AATGCTAGCCGAGGTAGTTTCGTTTGCACTGGAAGCACCCGTGAGGTCCA	ENSMUST00000081567	Mtf2
MTFR1_30580	GGCAGCAGCTGTTGCTACTTCGCCTTCTCTCTTACCCTCTCATTGGAGCG	ENSMUST00000117529	Mtfr1
MTFR1_31813	CAAAGTCTTTCCAGCACTGAGTCTCTGCTCTCTTCTTTCTTTAATCAGAT	ENSMUST00000117529	Mtfr1
MTHFD1L_31363	TGGCTGGAAACAGAGTTAATCTTGTATGAGGAAGCGGTCTTTGGCCTGTC	ENSMUST00000117291	Mthfd1l
MTHFD1L_32017	ATACAGGAACTGGAAGCGGCTTCTTTTATTCGCAGCTTCTCTCACAGCCC	ENSMUST00000117291	Mthfd1l
MTHFD2_31180	TGTTTGGACTTGAACACTTCCAGCTCCTCTGGTCTTAGCACTTTCTTTGC	ENSMUST00000005810	Mthfd2
MTMR2_29554	GTCTGCAGAGGTTGAAATGGAATCTGATGATATAGCAGAAGCTGATTTGG	ENSMUST00000156801	Mtmr2
MTNR1A_29874	TAGCAGTAACGGTTCATAGCGATCCCCGTGATGTTGAATATCGAGCCGAT	ENSMUST00000067984	Mtnr1a
MTNR1B_31598	AACCACAAACACTGCAAACATGGTTAGGAAACTGCGCAAATCACTCGGTC	ENSMUST00000057920	Mtnr1b
MTX2_29360	GCTGTTCAATTCTTCTACAGAAAGCCAGGAGGTTGCTATAGTTTTTCACC	ENSMUST00000028511	Mtx2
MUP12_29327	TGATTCTTGATGAGGTATCCTAGGTAACATGTGGATAGACTGGAATTGGA	ENSMUST00000117932	Mup12
MUP13_29048	GGAGGCTCAGGCCATTCTTCATTCTCGGGCCTGGAGGCAGCGATCTGTAG	ENSMUST00000098042	Mup13
MUP15_31804	ATGAGCCATAAGAAAGTTATCATAGTCTGTCTTAGGTATAGTAAATGTAT	ENSMUST00000095049	Mup15
MUP19_29560	GAGGTATCCTAGGTAACATGTGGATAGACTGGAATTGGACTTCTCAGTGA	ENSMUST00000080606	Mup19
MUP3_29559	TCTGTGAGACAGGTGGAGAGCAGATCACAGACCTTGGCATGGGAGTCTGT	ENSMUST00000107472	Mup3
MUP8_32263	CTGGAGGCTCAGGCCATTCTTCATTCTCGGGCCTGGAGGCAGCGATCTGT	ENSMUST00000163931	Mup8
MURC_29112	CAATGTGCTCTTTGCCTGACTTCCTAAGCCTGGCAGATCTGCTTTCTTCA	ENSMUST00000030033	Murc
MVD_31506	GGTGACCATTAGGTCCTGAGGCTTTTCTGAGGCCATAACTGAGATGCTGG	ENSMUST00000006692	Mvd
MVP_31033	CTGCAGCCTGGCATGATCTGCAGTTTCGATGGTGATGACGTCAGTGAAGA	ENSMUST00000165096	Mvp
MX1_30118	CTTAAAGAGATTGCCTGAGTTCACCCATGTCTACAAAGAACCCTTAGAAG	ENSMUST00000113768	Mx1
MYB_31089	CCAGAGTTCGAGCTGAGAACGCGTTCACGTATTTCCGAGCCGGACCGGAG	ENSMUST00000188495	Myb
MYBL1_30976	GGTAGCTGTGTAAGTACTCAGATATCTTCTCGCTTGTTCAGTCATGATAA	ENSMUST00000088658	Mybl1
MYBL2_30389	GAATGAGGGTCCGAGATGTGTGGCTGGACTTCAGGCGGCTCAGGAGCTGC	ENSMUST00000018005	Mybl2
MYBPC1_30196	CTCTTACAAAGAGCTCAGTAGAACATTTCTCATCTCCAGCTGTCACATAG	ENSMUST00000121629	Mybpc1
MYBPC2_29222	TCGAGCTGTGTTCTTGGAGACACCTGGCGAGTCACTGAGACCGCAGATGT	ENSMUST00000165208	Mybpc2
MYC_30907	ACTTGCGGTTGTTGCTGATCTGCTTCAGGACCCTGCCACTGTCCAACTTG	ENSMUST00000188482	Myc
MYCBP_31945	TCATGGCGACCGGGACGCTGTGTATCCCTGTCTCCTCGGAGCCTAGAGAG	ENSMUST00000030400	Mycbp
MYCBP_32134	GGACGCTGTGTATCCCTGTCTCCTCGGAGCCTAGAGAGGCTGCGTGAGCC	ENSMUST00000030400	Mycbp
MYCBP2_30396	CTCTGAAAGTCATCATGACAAGCATTACAGAAATGTGTTGTTCCGAAACA	ENSMUST00000159855	Mycbp2
MYD88_31182	TTCAAGAACAGCGATAGGCGGCGCCTCACTCCCACGTTAAGCGCGACCAA	ENSMUST00000035092	Myd88
MYF6_30449	AGCTCCTGCATCTTCTCTTGCTGATCCAGCCGGTGCAGCAGGTCCTGTAG	ENSMUST00000044210	Myf6
MYH1_30160	CTTGTCTCTTGTAGGCCTTGACCTTTGATTGCAGTTTGTCCACAAGGTCC	ENSMUST00000124516	Myh1
MYH2_30678	TCGTCTCTCGTGTTTGCGCAGACCTTTGACGGCCTCAGCATTCCGCTTCT	ENSMUST00000170159	Myh2
MYH3_31450	CCTGCCTCTTGTAGGACTTGACTTTCACTTGGAGTTTATCCACCAGATCC	ENSMUST00000108689	Myh3
MYH4_31075	CCTGTCTCTTGTAGGCTTTCACTTTAGTCTGTAGTTTGTCCACCAAGTCC	ENSMUST00000018632	Myh4
MYH8_31447	CAGGCTGCATAACGCTCTTTGAGGTTGTACAGCACTCCGGGCTCATGGAG	ENSMUST00000108685	Myh8
MYL1_31092	TGAGACTGAAGCCTGTCAGTACTTTTATGGTCTTTATCTCTGAGATGTTC	ENSMUST00000186202	Myl1
MYL12B_30832	GGAAACTAGCCTGGCTGCACGACCCGACGAACTCAGCCCCTGTAGCCGCG	ENSMUST00000038446	Myl12b
MYL2_31232	ACTCCCATCTTCTCCTACTGGTTCTCGTCTGTCTGAGCAGGATGACATCA	ENSMUST00000111751	Myl2
MYL2_32080	TTGAACTCCTGGATCTGGGTCTGCTCAAACATGGAGAACACGTTGGAGCT	ENSMUST00000111751	Myl2
MYL3_30205	GAGCTGTAATCACAAAGAGGAGGGAAGAAGGAAAGGAGAAGAGAGTAAGA	ENSMUST00000079784	Myl3
MYL3_32042	CGTACGTGCCAGTGTCCTTGTTCTTGGAGATGTGCTGGAGCATAGGCAGG	ENSMUST00000079784	Myl3
MYL9_29990	AGCATGTCGTGCAGGTCCTCCTTATCAATGAAGCCATCTCGGTTCTGATC	ENSMUST00000088552	Myl9
MYLK_30723	CCTCCATGGTCTCCACGATGAGCTCCGCAGTGCAGGTGGCTTCTCCGAGG	ENSMUST00000023538	Mylk
MYLK4_29402	ATGACAGTCACTACACAATCCACTTTTAATTCTGATCTGCATGAGTGAAC	ENSMUST00000057428	Mylk4
MYLK4_31819	TCAGATTTGCTCACGGTGTACAGATTGTCCACTGAAGCATGTTTGGCCAT	ENSMUST00000057428	Mylk4
MYLPF_30186	TTGAACTCCTGGATCTGAGTCTGGTCAAACATGGAGAAGACGTTGGAGCT	ENSMUST00000206772	Mylpf
MYO10_30250	CCTGCAGTTTCTTCCACTTGTCAATGATGCTGGTGCGAGCCGAGCAGACT	ENSMUST00000110457	Myo10
MYO1G_29867	CCTGGAACCGGCGCTGTAGTTCAATCAGGTGAGCACGCACCTTGTGCCTC	ENSMUST00000003459	Myo1g
MYOM2_29260	TGACATACTTGGACTGCTCCATCTTCACCAAGAAGTGCTCGCTGAGCTCA	ENSMUST00000033842	Myom2
MYOT_29259	TGACATCTAATCGTGTGTTACACGTGGTCACACCAGCTTCATTGACTGCT	ENSMUST00000025349	Myot
MYOZ1_29262	AGCCATACTGTCCAGCAGAGCCACTGCTGCCAGCCTGGCCTCCACTGCTG	ENSMUST00000090469	Myoz1
MYOZ2_31346	TTGGCGCCCTGTTAAAGCATCGTCTGCCCGAAAGAGGATTGGCAAAGGCC	ENSMUST00000029761	Myoz2
MYPN_29309	GCTGACAGTGTGTACCACCCAGCGTCGGACTTCTTGGCTGGCTGGATGAG	ENSMUST00000095580	Mypn
MYT1_32062	CCCTCACAGCTTGCTTGATCGTTTCCAGAAGGCCTTTGTTCTCCGGATTC	ENSMUST00000081125	Myt1
MYT1_32190	ATTTTCCAGGAAGCTCCCGCAGAGCGTCATCCTGGCAAGATGGATGAACC	ENSMUST00000081125	Myt1
NAA15_31429	GGTTGTATCTGTTGAACTGCCTGTTAACAGAAATCCTCAATCCTTAGAGG	ENSMUST00000193266	Naa15
NAA15_31855	TTATGACAACTTGCTCTGTAGGCTTCGGCAGCTTCTTTACAGTCTCCTAG	ENSMUST00000193266	Naa15
NACA_29898	AGCAGTGATGGCCAAAGCACTTTCTGGAGCAGGTGCAGCAAGCATTTCCG	ENSMUST00000092048	Naca
NACA_31987	TTCCTGTAGCCAGCCGAGCAGCTGTTCTCACGGGCACGGCGGTGGCGCGG	ENSMUST00000092048	Naca
NAIP2_31633	GATATGCCTGGAAATGTCCAGGTTTTTCAGGTTTGGCAGGTTGTCCAGGA	ENSMUST00000117913	Naip2
NAP1L3_30602	CTTCTCTTGGTTCCAGCTTCCCAATCAAAGGAATCTCAGGAGGACTGAAG	ENSMUST00000079490	Nap1l3
NAP1L4_29944	AAGGCTGAGCACACTCTACATGGCTGGTCACTGTGGACATGGCTGTCCTG	ENSMUST00000072727	Nap1l4
NAP1L5_31694	GGCTTGTAGATATCGTTGTACTTCTTCTCCAGAGCCTGGAATTCCTTGTC	ENSMUST00000059539	Nap1l5
NARFL_31153	AGGTTCTGGATATTACGGAAACCATAGGCCACAGCAAAGCGCAACAGTAC	ENSMUST00000134108	Narfl
NARS_30652	GTCAATCCCTTCCCTCTTATAGCCTTCGAGAATCTCCTCACTGTCCCAGG	ENSMUST00000025483	Nars
NAT1_29100	GTACTAGAAGGTGGACCATTTCACTGCTATATTTGCTGACTGGAGTTATG	ENSMUST00000026677	Nat1
NAT2_30293	TGCTGTACTTATTGGCTGGAGTGTTAAAGACATATCCTCCCAGCATTGTG	ENSMUST00000093470	Nat2
NCAPD2_30162	CTTGCCCTCAGGCTTGGCCCCGCGACGCAGTTTGCCCACAACTGACAAGA	ENSMUST00000043848	Ncapd2
NCAPG_30797	CCAACCGATGAAGAAACTCTAGAATATTCCCTTCAGTGAAACGCAACCAG	ENSMUST00000117396	Ncapg
NCAPG2_29968	CTTCCAAAGTGATCTCCATAAAGGTCTTCAGCTTTCTGTACACAGCTGTT	ENSMUST00000084828	Ncapg2
NCAPH_31028	TACTGAACTGCAGGTCAAAGACCCTGGAGCGTCTCCGCTGCATCCGCTCC	ENSMUST00000110387	Ncaph
NCBP1_29903	TTAGGCCTGCAGAGCACAGAATTGCTGGAACACAGCCAGGATGTGAGGGT	ENSMUST00000030014	Ncbp1
NCBP2_29589	CGCTGAGTTCCACGTAGGAGTCGCTGCGCAGCGCCTTCAGTAAGCCACCC	ENSMUST00000023460	Ncbp2
NCF2_31067	ACCCAGGCTTGTCTGAACTCCCAGTACTCCGGCCTCAGACTTTGAATTTC	ENSMUST00000186568	Ncf2
NCF2_32047	GCCTTCCAAATTCTTGGCTGCACATCCTTCAACAAAAGCCTTCGGGAAAA	ENSMUST00000186568	Ncf2
NCF4_30228	TGCCCAGCTTCTCTGGACCCTCCTTGAAGTACCTCCTTCAGGCTTTGAGC	ENSMUST00000096357	Ncf4
NCK1_29117	ATTGCCAGCAAACTTCCCAGTGAGTGAAGGCCTAATGTAATCACATTGTG	ENSMUST00000116522	Nck1
NCK2_31492	TGCTCCACAAGCTCGTCCATGCTGTGGAACCGCCGCTGCCCAATGCAGTA	ENSMUST00000086421	Nck2
NCKAP1L_31716	AGGTGCGTTTCAATGTTCTTGTTGTACAGAGTGAAGAGGGCAGCAGACAC	ENSMUST00000047405	Nckap1l
NCOA3_32112	TGCTGCTGTTGCTGCTGCTGTTGCTGCAACGATGGTCTTGCACCTGGCAG	ENSMUST00000109252	Ncoa3
NCOR2_29294	TGGAGATCTGCTGCTCTACCATGGTGATCTCACGGTCCACGCGGTCCATG	ENSMUST00000111402	Ncor2
NCOR2_31924	GGCCCTCCTTCGCGGATTGTTCTCTATGCGCTCTACCTTCTTCTCCCACG	ENSMUST00000111402	Ncor2
NDC80_29199	CCTGCTGGTGAAGGTCATCCAGTTTCTGAATCTCCTCCTTCAGCATCCTC	ENSMUST00000024851	Ndc80
NDN_29800	CGCTGGTACTTCAGGTAATTCTGCTGGACGAACTCCTCGGTGATTATCTT	ENSMUST00000038775	Ndn
NDRG1_31127	AAGTGTAGGTTGCTCGGGTTCATGTCGTTGAGGATGTGCTGGCGGTACGT	ENSMUST00000005256	Ndrg1
NDUFA1_30650	TCTCGAACCACATCTCCGCACCGTTACTCGCACGCCAACCCGTCACCGGC	ENSMUST00000016571	Ndufa1
NDUFA5_29432	TGAAGAATGCTTTCCCTCCACGTGTGTGAATGCATACTCATAAGTGGAAA	ENSMUST00000023851	Ndufa5
NDUFA5_31959	TTCAGCAAGCCCGCCATGACAGCGTCCAGCGCCTCCAGCGCACAGCCCTC	ENSMUST00000023851	Ndufa5
NDUFA9_30682	TTGGCAGGCTTGGTTTCCTCGATCTCAGAAGACAGCCATCGGTAGGTACG	ENSMUST00000205002	Ndufa9
NDUFB10_30599	GAACATCACCCTCTTTGCATTCTGTGATGTCTGGCACTCGACGGTACTGT	ENSMUST00000045602	Ndufb10
NDUFB5_30379	ATTAACCTCAAGAAGCGAGCGTCATAGTATAAAGAAGGCTTGACGACAAA	ENSMUST00000127477	Ndufb5
NDUFB6_31712	CCTGGTCCTTCAGCCATCGTCTCCTTAGCTCCCGCAGCTGCTGCAGCCGC	ENSMUST00000095128	Ndufb6
NDUFS2_31161	AGCTTCAATGGCAGTATATGTGGCTCCTGGAGGAACTTGGTAGCCCTCTG	ENSMUST00000013737	Ndufs2
NDUFS7_31350	GGTCCGTCCTCCAAAGAGTTCCGGTTCTAGTCCAACGCCCAAATAGACAC	ENSMUST00000105364	Ndufs7
NDUFS7_31997	TTGGCCTCGGCCTTCAGACAACCTCTGCGGTCCGTCCTCCAAAGAGTTCC	ENSMUST00000105364	Ndufs7
NDUFV1_31427	GATCCATAACAATAACTGCAGCCGTGCCCAGGCCTGTCTGAGCCTGCACC	ENSMUST00000134479	Ndufv1
NDUFV2_31584	GCTTGCACACCAAAGCCAGGTCCTTTGGGTGGTTCAGTCAAAGAAGTAAG	ENSMUST00000024909	Ndufv2
NDUFV3_29149	CTCTCTTCAACAGTATCTTTCTCCTGAACAGGAAGTGTCTTCGAATAGCT	ENSMUST00000046288	Ndufv3
NDUFV3_31830	AATTTGGAGAGGTCCAGGTTCAGGTCCAGGAAGGTGTATGTGTTGTAGTC	ENSMUST00000046288	Ndufv3
NEB_30301	TGCATGTCTGACATGTAACAATGCTGGCGTGACCTCCAGGCCCGTCAGGT	ENSMUST00000028320	Neb
NEDD8_31801	CCTTGATTCGCTCCACCTTGTCTGTGGGTTCGATGTCTATCTCAATCTCC	ENSMUST00000163750	Nedd8
NEFH_31663	TCTCCTCAGGCTTCCTGGACTCTGTGGTCTTCTCCTCCTTGGTGTCTTTC	ENSMUST00000093369	Nefh
NEFL_31212	TAGGAGCTGCTCTGCAAGCCACTGTAAGCAGAACGGCCGAAGACCTGCGA	ENSMUST00000022639	Nefl
NEFM_29308	GCACCTTCTTGTCCAGCTCCACCTTAACCATCGACGACTCTTCGATGTCT	ENSMUST00000111089	Nefm
NEGR1_30902	AGGCTCGCGTTGGTTGTACCCAACTTGTTGGCAGCCACACAAGTATAGTT	ENSMUST00000074015	Negr1
NEIL3_30009	CAGGCATAAAACTGCCTCCCCTTGTTTTCTCCATCTTTCCTCACAACTCG	ENSMUST00000047768	Neil3
NENF_30543	GGCGCGGCGTCTGCCCAGCCCAGGCTGAGGGCACTGGGACCAGAGCCAGC	ENSMUST00000046770	Nenf
NET1_29808	TGACTGTGCTTTGTCCCTTGCTCTTCGTAAGCCAGGCTGAGGCCGCTGTG	ENSMUST00000091853	Net1
NEUROD1_30953	CTAATCGTGAAAGATGGCATTAAGCTGGGCACTCATGACTCGCTCATGAT	ENSMUST00000041099	Neurod1
NEUROD6_31074	TTGAGGCCGTGCATCCGGTTCCTCTCGCGCGCATTAGCTTCCTGTCTCCT	ENSMUST00000044767	Neurod6
NFATC3_31546	GTAAATGAGAAGAAGGCTGACCTGTGATCTGGTCTGCCACTGGAGAAGAA	ENSMUST00000109308	Nfatc3
NFATC4_31336	CTCAATGAACACCACTTTAGAGTCTGGCAGGAAGTTGGAACCAGTCAACA	ENSMUST00000172271	Nfatc4
NFE2L2_30497	TACCTCTCCTGCGTATATCTCGGATCAATGCGAGCTGAGCTTCATTGAAT	ENSMUST00000102672	Nfe2l2
NFIB_30107	AGCACAAAGTCCTCCCGGTACTCCTGGCGGATATCTTTGCGCAGTTTGGC	ENSMUST00000064770	Nfib
NFIL3_31222	GCAGATAAGTTTGCTATTCCCTGCTTCAAATACAAATTCTCAGCTTCGGA	ENSMUST00000071065	Nfil3
NFKB1_30302	AGTAAGAGACTCTGTAAAGCTGAGTTTGCGGAAGGATGTCTCCACACCAC	ENSMUST00000029812	Nfkb1
NFKB2_30535	GCTTGTCGCGGGTCTCAGGACCTTTCAGCAGCCTGACTCCCTCATGGAGA	ENSMUST00000073116	Nfkb2
NFKBIA_29762	GGTAGGTTACCCTGTTGACATCAGCCCCACATTTCAACAAGAGCGAAACC	ENSMUST00000021413	Nfkbia
NFKBIB_31167	AGTTTTCAGCTTCTAGTTGTAGCCTCCAGTCTTCATCACGCGGCTCCTCT	ENSMUST00000032815	Nfkbib
NFKBIE_29261	ATCAATGTCAGCTCCATTCTGAAGCAACAGTTCTATGAGCGGTTGGTTCC	ENSMUST00000024742	Nfkbie
NGB_29648	TTCCTGCCCAAGCTGGTCAGGTACTCCTCCAATGAAGACAGGTCCTCCAC	ENSMUST00000110177	Ngb
NGB_31939	CTCATGGCTTGCACCACAGCTCCGTAGAGTCGGCTCCAGGCGGTCCTTGT	ENSMUST00000110177	Ngb
NGFRAP1_31066	TTCTCAGCTGTAGCTCCCTAAGCTTTCTCCGGATCTCTCTCATCTCCTCC	ENSMUST00000178632	Ngfrap1
NGRN_30300	CTCTTCCAGCAGCACAGCACTTGGTAACGTATCACTGCCAGCTCTTCCGG	ENSMUST00000117989	Ngrn
NHP2_31697	GGGATGTAGACGTAGGGCAAGTTCTGGTCCTCGCACAGAACTGGAAGATG	ENSMUST00000127405	Nhp2
NIFK_29734	TTCCTCCTAGACCTCTTACGCTTCTTAGGAATGTTATTGGAAATGTCCTC	ENSMUST00000027626	Nifk
NIPSNAP1_29272	GTGGCTCATTCCAGAAGCTGAACTCCAGAAGCAACTGGTTTCTCCTGGAC	ENSMUST00000038570	Nipsnap1
NIT1_30411	TTCGTGCAATAAAGTCAAATGCCTCAGGCAGAAAGGCCAGGCAAGCACCC	ENSMUST00000111296	Nit1
NKX2-2_30984	AATGGACTTTACCCAGACATCCCTCAAATCCACAGATGACCAGATTGTGC	ENSMUST00000109970	Nkx2-2
NKX2-2_31886	CTTTGTGTTGGTCAGCGACATGGTTCCGGACCCCGCAATTTATGCCACAA	ENSMUST00000109970	Nkx2-2
NLGN3_30638	GGTGTTTCCAAAAGGCTACCTTTGTGGCCCGGTAATGATCACGAACCCTT	ENSMUST00000151528	Nlgn3
NLRX1_32230	AGCTGTGGACGTTGCGCTGGACTTCACTAAGGATCACTGACCAGTACTCA	ENSMUST00000169651	Nlrx1
NME1_29042	GCACAGCTCTTGTACTCCACCAGCTCCTCAGGCTGAAACCACAAGCTGAT	ENSMUST00000135884	Nme1
NME1_31953	CCGCTTGATGATCTCGCCCACCAGCCCCCGCTGGACCCCATCAGGCTTGA	ENSMUST00000135884	Nme1
NME3_31458	TCATATAGCCAATGTCCGGCGCTGTCCTCCCAGCACAGAAGCTCGGCCTC	ENSMUST00000024978	Nme3
NMI_32226	CCTTCCTGCAGCTCATAGAGAATTTGTGAGCTCACTTGAAAGGAACAGGA	ENSMUST00000145481	Nmi
NMT1_29598	TAGAACCAGTGCTCCACCTCCTCCTGGTTCATGACAGGCGTGAGGTGAAA	ENSMUST00000021314	Nmt1
NOL3_30530	TCTTGTTCCAGGTCTGGCTCATCCCCTTCAGTAGCTTCAGCTTCTAGTTC	ENSMUST00000014920	Nol3
NOLC1_29819	TCTGTGGTGTTTCTTCCTCTGAGCTGGAGTCCGAATCCGAGTCTGAGTCC	ENSMUST00000165017	Nolc1
NOP56_31376	GGAGGCTTATGGACTGAATAATCATGTTGTCCACTCGGTTCACATTAAAT	ENSMUST00000136621	Nop56
NOP58_30174	CCTGCGTACACAGATGTAGAATGTTGCAAATATCTTCTTCAGAAACCTCT	ENSMUST00000191142	Nop58
NOS1_29378	GTTCAGGACTGGAAGCTGCCAGCTTCCCCTTGCGCAACCTGGCTCACCCC	ENSMUST00000142742	Nos1
NOS1_31883	CCAAACGTGTGCTCTTCCATGGTATCTGTGTCCTTCAGAAGACCTCCAAG	ENSMUST00000142742	Nos1
NOS2_31425	TTCAGCTTGGTGGCCACCAGCTTCTTCAATGTGGTAGCCACATCCCGAGC	ENSMUST00000018610	Nos2
NOS3_29714	TTTGCAGGACGCTGGTTGCCATAGTGACATCGCCGCAGACAAACATATGT	ENSMUST00000030834	Nos3
NOS3_31996	GTGTAGTCTGTCTTGCCAGAATCCCCGGAAGGGTGCAATGCCAGTCCCTG	ENSMUST00000030834	Nos3
NOSIP_30062	ATGAGTCCCACGCGGTCCACAGAGTCGTCCAGCTGCGTGAAGCGCACTGA	ENSMUST00000003513	Nosip
NOTCH1_31178	TGGTGCATACGCTCCTGTGCGATGTCCCGCGGCAATCGGTCCATGTGATC	ENSMUST00000028288	Notch1
NOTCH2_30295	CACCTCCAGGAGTTGGGCTGGTGGTCACATCTGACCAGTCAGATGCAGAG	ENSMUST00000079812	Notch2
NPC1_30819	TGGCTATTAGCCGAGCTTTCTTCATGGCATCAGTATAGTCAGCGGAGGTC	ENSMUST00000025279	Npc1
NPDC1_29266	GAAGATAGGTGTTTCCTTGGCACACAGAACCCTCGCTGGTCTTCCTGGAA	ENSMUST00000071442	Npdc1
NPM1_29686	CGGAATCACGCCAAGGAAAGGACGCGGGCTCTCCGCACGTATATATGGTC	ENSMUST00000075641	Npm1
NPM1_32028	GACGGAATCACGCCAAGGAAAGGACGCGGGCTCTCCGCACGTATATATGG	ENSMUST00000075641	Npm1
NPRL2_30515	TTCTGAATGGCGATGCGCACCAGGTTGAGTTCCACGTCTGCCTCAGCGGA	ENSMUST00000010201	Nprl2
NQO1_29503	ATCTGGTTGTCAGCTGGAATGGACTTGCCCAGGTGATGGCCCACAGAGAG	ENSMUST00000003947	Nqo1
NR0B1_32199	GCCTGGTGGTAAGCATTTCCTGCGTCGTGTTGGTCTCCGGGATCTCCATC	ENSMUST00000026036	Nr0b1
NR1H2_30556	TCGTCCTTGCTGTAGGTGAAGTCCTTCAGGAACGTGATGCATTCTGTCTC	ENSMUST00000107912	Nr1h2
NR1H3_31573	TTCCCGGCTGCGTAGTCTCTGGAGCCCCCTTGCTGGGAGAAGAGGGTGTT	ENSMUST00000111355	Nr1h3
NR1H3_32090	CTGCAGAGAAGATGCTGATGGCAATGAGCAGAGCAAACTCAGCATCATTG	ENSMUST00000111355	Nr1h3
NR1H4_32156	TGGTGAAGACTAATCTGAATTGGATTTTCTAAACCCTGAAACTGCATCAC	ENSMUST00000058126	Nr1h4
NR1I2_30504	CACATACTCCTCCTTATGCAGCTGTAGCTTCTTCAGCATGCAGTGGAATT	ENSMUST00000023504	Nr1i2
NR1I3_30612	TTTGGAGCCGAGACTGTTGTTCCATAATGTGGTTGTTCAGAATCAGCGCC	ENSMUST00000005820	Nr1i3
NR1I3_32070	TCCAAGCGCTGAAGTTCATAGGAGTATGCATTGTTTATACTCCGGAGGTC	ENSMUST00000005820	Nr1i3
NR2F1_31325	CCAAACGTACGAAGAAGAGTTGCTCGATGACAGAGGAGGACACTGTGCGA	ENSMUST00000091458	Nr2f1
NR2F2_29606	TTGGCGCGGCACGTGTAGCTCAGGTTCCTCCGCACGCTGCGCTTGAAGAA	ENSMUST00000032768	Nr2f2
NR2F2_32006	AGGACTATGGCCTTGAGGCAGCTATACTCGGCGGAGTCGACGTGCAGTGC	ENSMUST00000032768	Nr2f2
NR2F6_31168	GTCGCCCCGGGAGGTGACGCCGAATCGTCCTCGGTCGCGCGTGGGTAGCT	ENSMUST00000002466	Nr2f6
NR3C1_30651	GTTGAGCGTGGTCATAATTCTCCATGCTGAGTCTGGAACAGAGCTGTCAT	ENSMUST00000115567	Nr3c1
NR4A1_31133	ACTGAAGGAGAAGAAGGTTGGAGGTGGCGGAGGCCCTGAAGAAGCCTTAG	ENSMUST00000023779	Nr4a1
NR4A3_31756	GCGCGGGAGAGAGTGGAGTGTGTGTGCGGAGCGTGTGAGCGCGCGTGTGT	ENSMUST00000030025	Nr4a3
NR5A1_31426	CGAGGCTGAAGAGGATGAGGAACTTGAGACAGACGAACTCCTGGCGGTCC	ENSMUST00000112883	Nr5a1
NRAP_31309	ACACCCGTGCAGTCTGGAATGGGATAGCATCCAGCCTGAAGTCATAGCCA	ENSMUST00000073536	Nrap
NRAP_31919	GAGCCTTCTTGGCATGCACCAAGGTCACCATATCCAGCGGCAGATGGAAG	ENSMUST00000073536	Nrap
NRAS_31615	TACCAACTCACACACGCTAAGTCCTGGACAAACGGCATTTACCAGGTTTA	ENSMUST00000029445	Nras
NRAS_31874	ATTAGCTGGATCGTCAAGGCGCTTTTCCCAACACCACCTGCTCCAACCAC	ENSMUST00000029445	Nras
NRCAM_32153	TTGTGTTGGCCGTACACGTGTAGGTTCCGCCATCGTCATCCTTTACATCA	ENSMUST00000020939	Nrcam
NRIP1_31465	ACCCTTCGAGGTAAGTTAAGACAATAGAATCCTGATGCACATCAGAGCCA	ENSMUST00000121927	Nrip1
NRP1_30889	GCAGATAGGTTCCTTTCTGACATCCCATTGTGCCAACAGGCACAGTACAG	ENSMUST00000026917	Nrp1
NRROS_30315	CGCAGATTCCCAAACGCAGAGAAGTCCATCTCTGCAGCGCCAGAACCAAG	ENSMUST00000115163	Nrros
NSDHL_30986	GTCCTTCCGCAGGTGGTGGAAACTCTGCACAGTCCTTTCCACAGCTTCAT	ENSMUST00000033715	Nsdhl
NSG1_30092	GAGATAATGGGAAGCCAGGGAGCCCCAAAGGTGGATGAAGGCAAGGTGCC	ENSMUST00000031009	Nsg1
NSG1_32023	CTTCGGTCTCCTGTTCCGACAGCTTCTCTTCTGACAGAACTGACATCCAT	ENSMUST00000031009	Nsg1
NSUN2_29631	CTTCATCTTCTCGCTGTTGTTCAGCAGTACATTCCTCAGCTCCTTGGAGA	ENSMUST00000109699	Nsun2
NT5C_33336	AGAATGTCTCCAAAAATGTGATCTCCAATATACAAAATGTCTTTGCCCTT	ENSMUST00000130992	Nt5c
NT5DC2_30263	AGTTGAGCAGGCAGCTGAGTGAGGCCATGTAGAGGTCGGAGAAGCGCACG	ENSMUST00000090212	Nt5dc2
NTRK1_31538	GATCCCGGTGCACAAAGTGCAGGCTGGCTAGATATACCATACCAGCAGCC	ENSMUST00000029712	Ntrk1
NUCB2_29574	TTTCCTCTTCTCCTCACTCAGCGTTTTTAAATACTCTCTCCGCTCGTGTT	ENSMUST00000032895	Nucb2
NUDCD3_32115	AGGCGGTAGAAGTCGGTCTTGCGGTAGAGAAAGCCGAAGAGCACGCGCAG	ENSMUST00000066496	Nudcd3
NUDT9_31407	CGAGTTTGATGAACTGAGAGTGACTGGCGTACAACTTGAGCTGGTCGCTG	ENSMUST00000031250	Nudt9
NUF2_31593	TCAGACCATTCTGACCATCCTCTTCTTCAGCTCTGCCGTCTTCTCCTCCA	ENSMUST00000028000	Nuf2
NUFIP1_30472	CCGCTTAAGGCTTATCTTTCTGAGTCCGTTCCTCTGGTTCTCCCACTTGG	ENSMUST00000022586	Nufip1
NUP133_29323	CAAAGTAAGAGTTGGACTTGAGGCTTCCCAGCTGCTCTGCTCGCAGTAGG	ENSMUST00000044795	Nup133
NUP37_31590	GTCACCCAGAACAAGAGCTTGTGGTCGCCTCCAACTGCACACAGTGGAAG	ENSMUST00000052355	Nup37
NUP62_30242	ATGTTCTCAGCCAGCTTGTAGGTCTTCTCACGCTCCTCATCAGCGTGCTG	ENSMUST00000208626	Nup62
NUP85_29233	GTTGTCACCGCCCAGGACATCTGCCGACAAACTGTCCACCTCGCACACGT	ENSMUST00000021085	Nup85
NUP88_29147	TTTGATGGCGTTGCCTAGATGTCGCAGTTGATCAGGTATCAGCTGTAACT	ENSMUST00000108531	Nup88
NUP93_29093	GATGGACTTGTTCCTTTGAGCCTCTTAAACTGTGTGAACAGGATGTTCAT	ENSMUST00000079961	Nup93
NUSAP1_30660	GACGAGACAAGCTTGCTTTGAGATCAAATACTGGCTTCTTACTAGAACTT	ENSMUST00000068225	Nusap1
NVL_30101	TGGTCAAATAACTCACGGAGCTTCTGCTCAGACTCTCCAGAAACTCCGGA	ENSMUST00000027797	Nvl
OASL1_29900	CAAGTAGCCCTGGCTCAGTTGGATTTTCTCTTTCAGTTTCTTTATGGGTT	ENSMUST00000031540	Oasl1
OAZ1_29830	GGCTCCTCTGTCACATTCAGCCGCTCGTCGGAGTACAGGATGCTAGCTGA	ENSMUST00000060987	Oaz1
OBOX1_31525	GCTTCCATTTGACTCTGGCAGTACTTGTTCAATATTCTGGAGGTTCATCC	ENSMUST00000172463	Obox1
OBOX2_31099	ATGTTTTTGCAGCAGGCCCTGCTCTTCTTTGGTGTACACAGTTCGTTCTT	ENSMUST00000174076	Obox2
OBSCN_29152	ACAAAGGCCACCTCACCCATGTCCTCCAAGGTGCACTGGAAGATGGTCAG	ENSMUST00000020732	Obscn
OGN_31129	TGCCCTCCAGGCGAATCTCTTCAATTCGCTCCCGAATGTAACGAGTGTCA	ENSMUST00000021822	Ogn
OIP5_30254	CTTGCTTAAACTGATGAGGAGACTTTCCCTTCAGAAGCCCCGTCAGTGAG	ENSMUST00000123818	Oip5
OLFML3_31613	ACAAATGCCTGTCATCATCTCGAGTGGCATAGACAGCCCACAGGCCCTCC	ENSMUST00000029440	Olfml3
OLIG1_31794	AGGATGAGGATGAGGATGAGGAGATAGGTGGCTGCCTGTAACCCACCAGC	ENSMUST00000056882	Olig1
OLIG2_30585	CGTAGATCTCGCTCACCAGTCGCTTCATCTCCTCCAGCGAGTTGGTGAGC	ENSMUST00000035608	Olig2
OMT2B_30055	CAGGTACAGACTTCAGGTTCACTCCAGGCATTTAGCTACTTAGTGGCTGA	ENSMUST00000187667	Omt2b
OMT2B_31976	CTCGATTTCGCTTGGTCCGGAGATTGCAAGCTAGCGACACAATCACAAAC	ENSMUST00000187667	Omt2b
ONECUT1_30247	TGGCCTGTGGGATGCTGTAACGTTTGAGCTCGGTGGTGATACGCTGCGCC	ENSMUST00000056006	Onecut1
OOG2_29965	CATGAATTGGAGTTCTGTTGTCACTTTCAATTTGTTCTTTGTCCCATAGC	ENSMUST00000080405	Oog2
OOSP1_29510	CATTGCTCAGGCTGAAGATCAAACCCCAGAGAGGAAATGAGAAACAGGAA	ENSMUST00000048214	Oosp1
OOSP1_32003	AGGCTTCATTGCTCAGGCTGAAGATCAAACCCCAGAGAGGAAATGAGAAA	ENSMUST00000048214	Oosp1
[truncated: 1,047 more rows]

## Sheet: TableS2
Table S2. Differentially expressed genes in the duodenum associated with exposure to (A) hexavalent chromium at 180 ppm (in drinking water), (B) captan at 6000 ppm (in feed), (C) folpet at 6000 ppm (in feed), (D) captan at 12000 ppm (in feed), and (E) folpet at 16000 ppm (in feed).
BioSpyder ProbeID	Gene Symbol	log2 Fold Change (Exposed / Control)	Wald Statistic	Wald Test p-value	Benjamini-Hochberg adjusted p-value (FDR)
(A) Chromium
GM5771_32251	Gm5771	4.78636	3.45908	0.000542024	0.00847748
GABARAP_30872	Gabarap	3.97954	3.57792	0.000346343	0.00612781
B4GALT1_29184	B4galt1	3.2551	4.3555	1.32765e-05	0.000443618
CAPG_29439	Capg	2.94724	6.17422	6.64927e-10	2.57726e-07
SERPINE1_30978	Serpine1	2.33907	2.5419	0.011025	0.0752343
RAB31_31119	Rab31	2.29525	5.62874	1.81529e-08	2.93169e-06
XPC_29201	Xpc	2.23855	2.47301	0.0133981	0.0871327
BNIP3_31290	Bnip3	2.14416	5.75586	8.62032e-09	1.97122e-06
HSD3B2_30890	Hsd3b2	2.02439	5.61199	2.00012e-08	2.98172e-06
TUBB2A_29725	Tubb2a	1.98316	4.20459	2.61551e-05	0.000804581
S100A6_32030	S100a6	1.95668	2.96539	0.00302299	0.0318191
ALDOC_30272	Aldoc	1.95066	2.45138	0.0142309	0.0895435
DBP_31391	Dbp	1.93749	6.96074	3.38487e-12	3.27994e-09
NRAP_31309	Nrap	1.88743	3.06346	0.00218795	0.0247968
ARSA_31597	Arsa	1.85917	3.68239	0.000231057	0.00448457
GPR17_30332	Gpr17	1.81113	4.13194	3.59719e-05	0.0010252
CES2A_31253	Ces2a	1.80676	3.16864	0.00153152	0.0191489
INHBA_31771	Inhba	1.69257	2.83366	0.00460187	0.0426873
SLC28A2_30206	Slc28a2	1.68963	2.74534	0.00604485	0.0492223
SLC11A2_30661	Slc11a2	1.58177	3.45998	0.000540223	0.00847748
SRC_31508	Src	1.54974	2.83169	0.00463022	0.0427303
FGFR2_29411	Fgfr2	1.54485	2.90372	0.00368755	0.0366486
PFKL_29773	Pfkl	1.50907	4.65771	3.19745e-06	0.000149976
SERTAD1_30462	Sertad1	1.47707	2.80429	0.00504268	0.0444214
BHLHE40_32105	Bhlhe40	1.44656	3.69375	0.000220968	0.00446984
SPRR2A3_29550	Sprr2a3	1.40684	2.89075	0.00384322	0.037808
FZD1_30078	Fzd1	1.35837	2.6805	0.00735125	0.0563282
KLF4_29531	Klf4	1.33129	5.41975	5.96838e-08	6.08775e-06
FABP5_29285	Fabp5	1.30938	3.28712	0.00101217	0.0139119
ME1_30135	Me1	1.30395	5.42123	5.9189e-08	6.08775e-06
POR_29647	Por	1.22538	6.4613	1.03804e-10	5.02931e-08
CCL24_31046	Ccl24	1.20489	2.81192	0.00492467	0.0439764
CREB3L3_30039	Creb3l3	1.19617	7.91037	2.56619e-15	4.97328e-12
HSD17B11_31408	Hsd17b11	1.19449	6.8143	9.47207e-12	6.11896e-09
ELOVL6_30026	Elovl6	1.18686	4.11529	3.8669e-05	0.0010861
CBLB_29228	Cblb	1.1762	3.13493	0.00171893	0.0206912
MAFF_30224	Maff	1.17511	4.41707	1.00049e-05	0.000346242
APOA1_31604	Apoa1	1.15342	5.23354	1.66298e-07	1.53469e-05
CAR9_30338	Car9	1.14307	4.84684	1.25443e-06	6.92685e-05
SLC6A8_29415	Slc6a8	1.11839	5.7761	7.6451e-09	1.97122e-06
MAPKAPK3_29451	Mapkapk3	1.09223	2.72933	0.00634634	0.0505986
TNIP1_29881	Tnip1	1.08771	4.38121	1.18024e-05	0.000401282
OXCT1_30310	Oxct1	1.08661	4.8865	1.02643e-06	6.21631e-05
LIPA_30123	Lipa	1.08412	4.51834	6.23272e-06	0.000257
FAM63A_31044	Fam63a	1.02132	4.4485	8.6474e-06	0.000316201
GSTA2_31572	Gsta2	1.02112	2.41128	0.0158965	0.0971708
INSIG1_31324	Insig1	1.00481	4.86091	1.16847e-06	6.6603e-05
CPS1_31199	Cps1	0.998118	2.58249	0.00980908	0.069015
CIDEC_30722	Cidec	0.997808	3.86876	0.000109392	0.00246514
UGDH_30314	Ugdh	0.99502	3.81835	0.000134348	0.00295872
ECI1_29682	Eci1	0.958886	4.86164	1.16415e-06	6.6603e-05
STAP2_29532	Stap2	0.957438	2.64538	0.00815988	0.0605895
FOS_31714	Fos	0.938231	3.99133	6.57036e-05	0.00161182
FAH_30189	Fah	0.91859	2.48201	0.0130645	0.0855369
RPLP0_32164	Rplp0	0.903056	5.67928	1.35263e-08	2.6214e-06
SAT1_30100	Sat1	0.902499	2.4069	0.0160886	0.0974364
STX16_29244	Stx16	0.889889	4.0794	4.51515e-05	0.00118756
NR1I3_32070	Nr1i3	0.884046	5.5114	3.55997e-08	4.92801e-06
PPARA_30567	Ppara	0.880245	4.53891	5.65459e-06	0.000243524
FAM20B_30491	Fam20b	0.869381	3.70433	0.000211946	0.0043697
GM3776_29765	Gm3776	0.846929	2.58425	0.00975903	0.069015
TSKU_31948	Tsku	0.84692	4.07528	4.59583e-05	0.00118756
ALDOA_29781	Aldoa	0.846573	4.15649	3.23178e-05	0.000978625
GPX1_30525	Gpx1	0.835977	2.60586	0.00916437	0.0652961
SLC47A1_29347	Slc47a1	0.820094	2.83835	0.00453479	0.0424561
SCP2_29592	Scp2	0.816698	4.52912	5.92289e-06	0.000249534
ABCB1A_29435	Abcb1a	0.814294	3.62582	0.000288047	0.00531652
POLD4_32109	Pold4	0.810659	2.74668	0.00602026	0.0492223
CES2B_29770	Ces2b	0.804467	4.84179	1.28672e-06	6.92685e-05
TOR1A_29452	Tor1a	0.797883	4.46655	7.94929e-06	0.000299802
PTGER4_29247	Ptger4	0.792803	4.65434	3.25026e-06	0.000149976
ITGB5_30516	Itgb5	0.792216	2.99395	0.00275388	0.0296501
DDR1_29774	Ddr1	0.775698	2.66878	0.00761262	0.0578559
CASP2_31416	Casp2	0.77058	2.96114	0.00306499	0.0318713
GSTA1_31374	Gsta1	0.765728	2.49207	0.0127001	0.0842905
ALAS1_32020	Alas1	0.761842	3.27776	0.00104634	0.0141595
RB1_31227	Rb1	0.755657	2.95085	0.00316896	0.0326672
FMO5_31731	Fmo5	0.746239	5.10891	3.2403e-07	2.32582e-05
JUN_29880	Jun	0.741796	2.75204	0.00592249	0.0486347
SLC16A3_30962	Slc16a3	0.710799	2.49828	0.0124796	0.0833984
NET1_29808	Net1	0.703822	3.82682	0.000129811	0.00289165
FABP1_29382	Fabp1	0.703209	3.70679	0.000209907	0.0043697
MBNL2_30289	Mbnl2	0.696724	4.13854	3.49516e-05	0.00101621
TXNRD2_31420	Txnrd2	0.692519	2.76206	0.00574384	0.0481886
MAPK3_31707	Mapk3	0.691997	5.47483	4.37931e-08	5.65807e-06
ABCC3_30114	Abcc3	0.691456	2.69076	0.00712892	0.0552634
PSMG1_32027	Psmg1	0.68261	2.51456	0.011918	0.0801982
IQGAP1_31135	Iqgap1	0.676006	3.16961	0.00152644	0.0191489
ETFB_32121	Etfb	0.674255	3.40931	0.000651282	0.0098878
RPS6KA1_31990	Rps6ka1	0.670552	2.99974	0.00270211	0.0293151
H2AFV_31972	H2afv	0.6674	2.83354	0.00460353	0.0426873
ABCC5_32060	Abcc5	0.664632	2.45883	0.013939	0.0891541
PAFAH1B1_31852	Pafah1b1	0.642368	3.43622	0.000589901	0.00914583
CAT_29095	Cat	0.63617	4.2777	1.88833e-05	0.000620268
PCCB_31069	Pccb	0.628778	3.11982	0.00180959	0.0215153
WIPF2_30352	Wipf2	0.622875	4.07638	4.57429e-05	0.00118756
GRB7_31752	Grb7	0.618449	2.82611	0.00471169	0.0430719
XPO7_30381	Xpo7	0.610973	2.73234	0.00628857	0.0503605
CASP7_29680	Casp7	0.6099	3.69324	0.000221416	0.00446984
ATP11B_30243	Atp11b	0.606605	2.7584	0.00580845	0.0485206
ALDH3A2_31955	Aldh3a2	0.606581	4.9612	7.00577e-07	4.52573e-05
ATP6V1D_31477	Atp6v1d	0.605845	3.45888	0.000542419	0.00847748
CEBPA_30781	Cebpa	0.605643	3.30234	0.000958821	0.0132728
KRT8_31071	Krt8	0.597807	5.15115	2.58891e-07	2.00692e-05
FAT1_29645	Fat1	0.597256	4.07792	4.54399e-05	0.00118756
PNKP_29493	Pnkp	0.594351	2.71124	0.00670329	0.052595
DSC2_30806	Dsc2	0.588087	4.78568	1.70413e-06	8.69108e-05
BNIP3L_30054	Bnip3l	0.587806	3.12354	0.00178692	0.0213768
COG4_32061	Cog4	0.587568	3.51299	0.000443088	0.00733936
ATG3_29318	Atg3	0.585982	2.45288	0.0141717	0.0895248
LAMP1_29317	Lamp1	0.583003	4.81332	1.4844e-06	7.77507e-05
HIST1H2BC_29206	Hist1h2bc	0.576759	3.07529	0.002103	0.0241161
CTNND1_31768	Ctnnd1	0.576739	3.98682	6.69646e-05	0.00162222
ENTPD8_29407	Entpd8	0.567989	3.13863	0.00169737	0.0205594
ALDH2_31423	Aldh2	0.56788	3.35181	0.000802854	0.0115954
LRRC16A_30234	Lrrc16a	0.566733	2.6804	0.00735347	0.0563282
TTC17_29841	Ttc17	0.565451	3.47904	0.000503218	0.00816934
SQRDL_31359	Sqrdl	0.555376	2.76546	0.00568418	0.0481046
ATP5E_29480	Atp5e	0.544406	3.40946	0.00065092	0.0098878
ABHD4_31836	Abhd4	0.53467	2.87876	0.00399241	0.0388808
ERBB3_30519	Erbb3	0.528992	3.21905	0.00128618	0.016729
TPI1_31828	Tpi1	0.522991	3.6804	0.000232869	0.00448457
VAT1_30537	Vat1	0.518448	3.39894	0.000676483	0.010163
ACAA1A_29428	Acaa1a	0.5158	3.92127	8.80823e-05	0.00203218
SNX7_29060	Snx7	0.514684	4.04899	5.14395e-05	0.00131138
LTBR_30584	Ltbr	0.512002	2.44383	0.0145322	0.091144
ABCF1_29590	Abcf1	0.50324	3.35934	0.000781294	0.0113846
EIF4B_30073	Eif4b	0.500543	2.87362	0.00405802	0.0390561
EPHX2_30975	Ephx2	0.498858	3.02655	0.00247363	0.0275934
ALDOB_29517	Aldob	0.498387	2.65676	0.00788953	0.0588073
QDPR_30038	Qdpr	0.496293	2.59153	0.00955499	0.0678299
FOXJ3_30348	Foxj3	0.49225	3.36065	0.000777605	0.0113846
WDTC1_31549	Wdtc1	0.491318	2.84453	0.00444768	0.0418427
HOOK2_30538	Hook2	0.485552	3.54654	0.000390323	0.00664761
RASSF1_29875	Rassf1	0.484475	2.47616	0.0132802	0.0866568
LYPLA1_32076	Lypla1	0.479329	2.9086	0.00363052	0.0362934
TAX1BP3_31994	Tax1bp3	0.469963	4.01018	6.0672e-05	0.00150747
PLCB3_30260	Plcb3	0.465434	2.61434	0.00893995	0.0644076
ACOX1_30274	Acox1	0.460263	3.9807	6.87136e-05	0.00163064
CS_30610	Cs	0.459686	2.96881	0.00298952	0.0316996
BECN1_30105	Becn1	0.456667	2.93847	0.00329836	0.0336433
TALDO1_30506	Taldo1	0.452537	2.76234	0.0057389	0.0481886
SPTAN1_31084	Sptan1	0.445813	3.27426	0.00105941	0.0141595
FURIN_30709	Furin	0.43469	3.16117	0.00157137	0.0192741
CHP1_29131	Chp1	0.432023	3.1632	0.00156046	0.0192622
ST14_29699	St14	0.427669	3.67947	0.000233716	0.00448457
MVP_31033	Mvp	0.420912	2.96842	0.0029933	0.0316996
BPGM_30927	Bpgm	0.419899	2.80892	0.00497079	0.043988
PRKCD_31926	Prkcd	0.413882	2.7533	0.00589983	0.0486347
NDUFB10_30599	Ndufb10	0.410725	2.86878	0.0041206	0.0393385
C2CD2L_31274	C2cd2l	0.409436	2.77457	0.00552745	0.0469834
BPNT1_31681	Bpnt1	0.406216	3.34741	0.000815706	0.0116238
PRDX1_29442	Prdx1	0.406137	2.45383	0.0141344	0.0895248
PFN1_30096	Pfn1	0.397499	3.14077	0.00168501	0.0205381
EIF3K_31464	Eif3k	0.388222	2.45692	0.0140133	0.0893349
BSG_32071	Bsg	0.385375	2.65845	0.00785005	0.0588073
ATP6V0B_30568	Atp6v0b	0.382415	3.00984	0.00261384	0.0286193
P4HB_31628	P4hb	0.370109	2.61521	0.00891738	0.0644076
NFKBIB_31167	Nfkbib	0.341957	2.40904	0.0159946	0.0971708
ACADM_31166	Acadm	0.311354	2.46821	0.0135789	0.0877537
CDH1_30717	Cdh1	0.311297	3.1659	0.00154602	0.0192063
PTPRF_31370	Ptprf	0.301782	2.70115	0.00691	0.0539983
PAK4_30980	Pak4	0.294217	2.60755	0.00911922	0.0652142
CSK_29174	Csk	-0.302473	-2.40959	0.0159706	0.0971708
HSP90AB1_31754	Hsp90ab1	-0.371912	-2.75276	0.00590957	0.0486347
2610528J11RIK_32135	2610528j11rik	-0.395029	-2.72751	0.00638136	0.0505986
G3BP1_31390	G3bp1	-0.404246	-3.64737	0.000264936	0.00503378
ATP1B1_31637	Atp1b1	-0.405715	-3.74185	0.000182669	0.00384796
MYLK_30723	Mylk	-0.415967	-2.68366	0.00728201	0.0562252
HYOU1_29983	Hyou1	-0.4298	-2.56268	0.0103867	0.0716352
SLC30A5_30122	Slc30a5	-0.444621	-3.10533	0.0019007	0.0223246
SMARCD2_31908	Smarcd2	-0.454214	-2.66987	0.00758817	0.0578559
ERH_29967	Erh	-0.468151	-2.98131	0.00287017	0.0307314
CANX_31730	Canx	-0.501758	-4.13736	3.51322e-05	0.00101621
SRSF3_30552	Srsf3	-0.504446	-3.48874	0.000485301	0.00797045
TRIM28_30003	Trim28	-0.508469	-3.6204	0.000294144	0.00537784
NR2F2_32006	Nr2f2	-0.511911	-2.40981	0.0159609	0.0971708
C920025E04RIK_30312	C920025e04rik	-0.518318	-2.78303	0.00538546	0.0464642
CNN3_31195	Cnn3	-0.533629	-4.464	8.04424e-06	0.000299802
EVL_29224	Evl	-0.533677	-2.69283	0.00708479	0.0551419
RRM1_30932	Rrm1	-0.553316	-3.02609	0.00247742	0.0275934
PSMD2_31608	Psmd2	-0.55514	-3.47764	0.000505841	0.00816934
HIST1H2BG_30236	Hist1h2bg	-0.562974	-2.85892	0.00425085	0.040186
NUDCD3_32115	Nudcd3	-0.563456	-4.49422	6.98261e-06	0.00027407
NME1_29042	Nme1	-0.569663	-2.80245	0.00507155	0.0444736
H2-K1_30014	H2-k1	-0.570184	-2.66378	0.00772687	0.0584948
HSP90AA1_31929	Hsp90aa1	-0.570694	-3.06998	0.00214073	0.0244044
FKBP4_29507	Fkbp4	-0.573689	-5.15648	2.51631e-07	2.00692e-05
CYCS_30865	Cycs	-0.57504	-3.34062	0.000835902	0.0118247
TRP53INP2_29494	Trp53inp2	-0.578273	-2.62798	0.00858928	0.0632008
TMEM109_29052	Tmem109	-0.582592	-2.78104	0.00541843	0.0464642
NR3C1_30651	Nr3c1	-0.586333	-3.09178	0.00198961	0.023228
SMAD1_32100	Smad1	-0.586959	-2.5818	0.00982876	0.069015
BCL7B_29133	Bcl7b	-0.593027	-2.42819	0.0151742	0.0948632
HIST1H2BL_30794	Hist1h2bl	-0.601867	-2.52502	0.0115693	0.0782386
FZD7_29683	Fzd7	-0.607381	-2.72673	0.00639663	0.0505986
TOP2A_30844	Top2a	-0.611202	-2.82178	0.0047758	0.043453
HIST1H2BM_30634	Hist1h2bm	-0.612539	-2.81232	0.00491861	0.0439764
MTA1_30728	Mta1	-0.618133	-2.78712	0.0053178	0.0463801
RPN1_29977	Rpn1	-0.629121	-5.42906	5.66522e-08	6.08775e-06
IGF2BP2_31560	Igf2bp2	-0.639808	-2.61231	0.00899328	0.0645518
CCT6A_29113	Cct6a	-0.641356	-5.38638	7.18923e-08	6.96636e-06
ACTA2_30581	Acta2	-0.64396	-2.81453	0.00488481	0.0439764
YTHDF1_31271	Ythdf1	-0.655841	-4.59829	4.25974e-06	0.000191985
CHGB_29666	Chgb	-0.66449	-2.4098	0.0159614	0.0971708
HNRNPH1_32039	Hnrnph1	-0.672559	-2.891	0.00384023	0.037808
NUP85_29233	Nup85	-0.675528	-3.35013	0.000807726	0.0115954
SPCS3_29472	Spcs3	-0.676913	-4.22891	2.34827e-05	0.000746057
MYL9_29990	Myl9	-0.680886	-2.72344	0.00646062	0.0508971
TFAM_30563	Tfam	-0.69757	-3.54667	0.00039014	0.00664761
PIGF_29840	Pigf	-0.700072	-3.01388	0.00257926	0.0284012
MOB1A_30692	Mob1a	-0.704742	-4.49154	7.07094e-06	0.00027407
ECM1_29959	Ecm1	-0.715018	-2.92549	0.00343917	0.0348959
H2AFX_31562	H2afx	-0.720468	-2.99912	0.00270764	0.0293151
CDC20_30847	Cdc20	-0.729061	-2.46094	0.0138573	0.0889253
KLHL9_29154	Klhl9	-0.731155	-2.48595	0.0129208	0.0850439
TUBA1B_30405	Tuba1b	-0.731394	-4.43514	9.20134e-06	0.000328876
CETN2_30963	Cetn2	-0.740314	-2.78597	0.00533682	0.0463801
BZW2_32278	Bzw2	-0.740679	-2.81048	0.00494677	0.0439764
MAP2K5_31654	Map2k5	-0.750434	-2.62595	0.00864079	0.0632008
RNASEH2A_29823	Rnaseh2a	-0.756665	-4.04599	5.21035e-05	0.00131138
HIST2H3B_31322	Hist2h3b	-0.759132	-4.50462	6.64905e-06	0.000268455
IARS2_29567	Iars2	-0.766577	-2.48527	0.0129453	0.0850439
MRPS2_31179	Mrps2	-0.790891	-4.54332	5.53742e-06	0.000243524
SNRNP40_30773	Snrnp40	-0.808121	-3.26369	0.00109971	0.0145976
CDK4_31888	Cdk4	-0.823133	-4.07582	4.58518e-05	0.00118756
GOLT1B_31718	Golt1b	-0.827118	-3.21634	0.00129838	0.016775
HIST1H3C_30792	Hist1h3c	-0.831769	-5.7457	9.15426e-09	1.97122e-06
NARFL_31153	Narfl	-0.833396	-2.40223	0.0162955	0.098382
HIST1H3G_31098	Hist1h3g	-0.841723	-4.2074	2.58322e-05	0.000804581
CCNA2_31974	Ccna2	-0.845472	-3.81514	0.000136108	0.0029638
RRP12_31011	Rrp12	-0.864602	-2.62551	0.00865205	0.0632008
AW112010_29636	Aw112010	-0.867228	-2.73794	0.00618255	0.0499241
HIST1H3A_31343	Hist1h3a	-0.870491	-5.03633	4.74545e-07	3.17127e-05
DPT_31638	Dpt	-0.891687	-2.94843	0.00319388	0.0327499
UBE2C_31522	Ube2c	-0.892145	-2.63393	0.00844021	0.0624318
FGF1_31461	Fgf1	-0.900325	-4.27248	1.93311e-05	0.000624396
DIS3_30964	Dis3	-0.916053	-3.38872	0.000702191	0.010468
MELK_30601	Melk	-0.927005	-3.27488	0.00105709	0.0141595
HS2ST1_29856	Hs2st1	-0.928851	-3.03052	0.0024413	0.0275072
IL1R1_30947	Il1r1	-0.941232	-2.8739	0.00405438	0.0390561
UGT2B35_29092	Ugt2b35	-0.942654	-3.58916	0.000331748	0.00595303
PIN1_29293	Pin1	-0.956731	-3.07815	0.00208288	0.0240275
TIMELESS_31062	Timeless	-0.96745	-3.4598	0.000540578	0.00847748
PRC1_29718	Prc1	-0.970019	-2.53273	0.0113178	0.0769607
DCTPP1_30412	Dctpp1	-0.989031	-2.46387	0.0137445	0.0884947
IGFBP3_31859	Igfbp3	-1.00298	-3.23456	0.00121828	0.0159529
POLR3B_30410	Polr3b	-1.00786	-2.65795	0.00786176	0.0588073
PTPRC_31576	Ptprc	-1.02148	-2.75517	0.00586622	0.0486347
IGF1R_30022	Igf1r	-1.02713	-3.28426	0.00102252	0.0139552
FBXO5_29404	Fbxo5	-1.02721	-3.97972	6.89951e-05	0.00163064
YARS2_29051	Yars2	-1.07204	-3.25292	0.00114225	0.0150591
MFSD10_30558	Mfsd10	-1.09441	-3.78215	0.00015548	0.00331121
CNKSR3_29653	Cnksr3	-1.1149	-3.52577	0.000422254	0.00711589
KRT7_30903	Krt7	-1.12445	-2.45263	0.0141817	0.0895248
LRRC41_31413	Lrrc41	-1.13479	-2.42004	0.0155186	0.0960866
PLK1_29780	Plk1	-1.13745	-3.81058	0.000138639	0.00298537
IFITM2_30327	Ifitm2	-1.14768	-2.96392	0.00303743	0.0318191
DHCR7_30763	Dhcr7	-1.17476	-2.62462	0.00867462	0.0632008
CYP3A41A_30418	Cyp3a41a	-1.17776	-2.57142	0.0101282	0.070861
KAT2A_31329	Kat2a	-1.19717	-2.73362	0.00626423	0.0503605
HIST1H2BF_29400	Hist1h2bf	-1.22051	-3.51985	0.000431787	0.00721382
CCND2_30507	Ccnd2	-1.25898	-5.11423	3.15031e-07	2.32582e-05
MCM7_31665	Mcm7	-1.26154	-4.43207	9.33342e-06	0.000328876
KLF2_30857	Klf2	-1.29142	-3.40856	0.000653064	0.0098878
NDUFV3_29149	Ndufv3	-1.29361	-3.21149	0.00132047	0.016836
GIMAP4_31881	Gimap4	-1.30432	-2.50151	0.0123665	0.082928
KCNK1_30362	Kcnk1	-1.31738	-2.42678	0.0152334	0.0949094
MYBL2_30389	Mybl2	-1.34203	-2.42569	0.0152795	0.0949094
HERC6_30292	Herc6	-1.37524	-2.56704	0.010257	0.0709928
HSPH1_32074	Hsph1	-1.38954	-2.87262	0.00407086	0.0390561
ECT2_31257	Ect2	-1.40267	-2.54851	0.0108185	0.0740855
ARHGAP9_31094	Arhgap9	-1.4146	-2.56974	0.0101774	0.0708861
CYP3A41B_30917	Cyp3a41b	-1.42269	-2.78204	0.00540185	0.0464642
PWP1_30231	Pwp1	-1.43452	-3.10714	0.0018891	0.0223236
ARFIP2_29354	Arfip2	-1.4382	-2.56881	0.010205	0.0708861
ITGAE_31885	Itgae	-1.44143	-4.66054	3.15388e-06	0.000149976
IFITM3_29087	Ifitm3	-1.44447	-3.63515	0.000277822	0.0051771
CKM_31031	Ckm	-1.45322	-3.6174	0.000297575	0.00538972
E2F2_30940	E2f2	-1.45725	-3.31523	0.000915685	0.0127669
NUP37_31590	Nup37	-1.45929	-4.93363	8.07144e-07	5.04595e-05
PAX8_31189	Pax8	-1.46536	-3.21361	0.00131078	0.0168231
GM6453_30766	Gm6453	-1.48645	-3.57681	0.000347812	0.00612781
WDR3_31029	Wdr3	-1.50374	-3.93186	8.42911e-05	0.00196815
CRELD2_31000	Creld2	-1.55585	-3.01682	0.0025544	0.0282882
VCAM1_31980	Vcam1	-1.56228	-3.20038	0.00137246	0.0173844
ID4_30949	Id4	-1.63629	-3.68839	0.000225682	0.00448457
FLNA_30270	Flna	-1.65419	-5.16263	2.43499e-07	2.00692e-05
FCGR3_30920	Fcgr3	-1.65752	-3.68396	0.00022964	0.00448457
A130071D04RIK_30094	A130071d04rik	-1.66636	-2.81859	0.00482347	0.0436817
GIMAP6_32133	Gimap6	-1.67685	-4.14055	3.46481e-05	0.00101621
SCG2_29080	Scg2	-1.73572	-4.66486	3.08832e-06	0.000149976
CENPF_31668	Cenpf	-1.74611	-4.11045	3.94891e-05	0.00109328
RAD51_31623	Rad51	-1.78959	-2.41411	0.0157738	0.0971708
DNTTIP2_31355	Dnttip2	-1.87743	-2.77565	0.00550918	0.0469834
TUBB3_31611	Tubb3	-1.92783	-2.46808	0.0135842	0.0877537
CD74_31435	Cd74	-1.93544	-5.94446	2.77362e-09	8.9588e-07
HEATR1_29954	Heatr1	-1.95045	-3.33378	0.000856738	0.0120316
H2-Q7_29061	H2-q7	-2.07186	-3.07899	0.00207704	0.0240275
FYN_30452	Fyn	-2.08535	-3.88727	0.00010138	0.00231146
HSPB6_30489	Hspb6	-2.12782	-3.56591	0.000362597	0.00633076
H2-AA_31286	H2-aa	-2.14334	-5.44596	5.15269e-08	6.08775e-06
LY6C1_31947	Ly6c1	-2.15864	-2.96011	0.0030753	0.0318713
PRKCH_31675	Prkch	-2.32657	-5.21238	1.86432e-07	1.64229e-05
HSPA1B_32188	Hspa1b	-2.35605	-3.37634	0.000734578	0.0108673
IGTP_30275	Igtp	-2.37854	-2.61592	0.00889876	0.0644076
H2-Q6_31131	H2-q6	-2.56072	-2.90838	0.00363308	0.0362934
GZMA_30882	Gzma	-2.63467	-5.64013	1.69921e-08	2.93169e-06
TCRG-C3_30375	Tcrg-c3	-2.76331	-2.86531	0.00416604	0.0395774
STAT5B_30522	Stat5b	-2.82429	-2.48557	0.0129343	0.0850439
NFIL3_31222	Nfil3	-3.11604	-2.87887	0.00399103	0.0388808
FASL_31241	Fasl	-3.428	-2.83005	0.00465402	0.0427464
HSPA1A_31063	Hspa1a	-3.48518	-2.6601	0.00781178	0.0588073
(B) Captan (6000 ppm)
CYP2A5_31713	Cyp2a5	8.33475	5.82598	5.67796e-09	7.73513e-07
GSTA3_30777	Gsta3	3.48884	3.72362	0.000196386	0.00386552
CYP2C29_31205	Cyp2c29	3.45038	3.78553	0.00015338	0.00323376
GSTA2_31572	Gsta2	3.29048	7.77371	7.62224e-15	1.3499e-11
CBR3_30786	Cbr3	3.19026	6.19079	5.98616e-10	1.32519e-07
CES1G_30475	Ces1g	3.15034	5.14737	2.6417e-07	1.7994e-05
CYP2C38_32195	Cyp2c38	3.11402	2.53565	0.0112239	0.0761589
SLC7A11_30093	Slc7a11	3.07159	3.00097	0.00269125	0.0283702
EPHX1_29453	Ephx1	2.50775	5.34072	9.25788e-08	7.45259e-06
ACAT3_31219	Acat3	2.36482	2.81266	0.0049134	0.045321
GM3776_29765	Gm3776	2.33913	7.13777	9.48579e-13	4.19983e-10
CAPG_29439	Capg	2.29061	4.79834	1.5999e-06	9.44474e-05
GSTA1_31374	Gsta1	2.27285	7.3974	1.38875e-13	8.19827e-11
UGT2B36_31076	Ugt2b36	2.13097	3.53425	0.00040893	0.00658377
TUBB2A_29725	Tubb2a	1.96947	4.177	2.95378e-05	0.000951117
ARSA_31597	Arsa	1.96059	3.89038	0.000100088	0.00233231
GPR17_30332	Gpr17	1.95022	4.46104	8.15632e-06	0.00037038
RAB31_31119	Rab31	1.7901	4.39185	1.12391e-05	0.000473914
SLC11A2_30661	Slc11a2	1.76651	3.86424	0.000111434	0.0024981
HSD17B6_29340	Hsd17b6	1.75719	2.58101	0.00985106	0.0692311
DERA_29246	Dera	1.73473	2.576	0.00999498	0.0694161
UGDH_30314	Ugdh	1.72132	6.6056	3.95903e-11	1.40229e-08
HSD3B2_30890	Hsd3b2	1.6916	4.69259	2.69765e-06	0.000140516
S100A6_32030	S100a6	1.63691	2.48234	0.0130523	0.0833278
PGM2_30214	Pgm2	1.54274	4.65452	3.24729e-06	0.000159749
BNIP3_31290	Bnip3	1.52217	4.08584	4.3917e-05	0.00130121
DBP_31391	Dbp	1.49711	5.37881	7.49789e-08	6.63938e-06
NQO1_29503	Nqo1	1.47692	4.12863	3.64934e-05	0.00111431
KLF4_29531	Klf4	1.41781	5.77689	7.60956e-09	9.62609e-07
YWHAZ_31838	Ywhaz	1.40041	3.24925	0.00115711	0.0151796
SGK2_30564	Sgk2	1.33385	2.6214	0.00875691	0.0635594
SRC_31508	Src	1.32808	2.42839	0.0151661	0.0922995
UGT2B15_29671	Ugt2b15	1.29433	4.99385	5.91865e-07	3.74354e-05
HDAC1_31793	Hdac1	1.29228	2.40025	0.016384	0.0970437
PGRMC1_31326	Pgrmc1	1.28835	6.54393	5.99233e-11	1.62736e-08
ME1_30135	Me1	1.28116	5.3298	9.8321e-08	7.57072e-06
CPS1_31199	Cps1	1.23916	3.21573	0.00130113	0.0165777
GSTM3_29784	Gstm3	1.23895	2.83094	0.00464117	0.0446712
DYNLT3_30548	Dynlt3	1.234	2.78161	0.00540896	0.0472607
SLC47A1_29347	Slc47a1	1.225	4.25215	2.11728e-05	0.00074994
GSR_30529	Gsr	1.1973	4.32511	1.52454e-05	0.000578927
POLR1D_30015	Polr1d	1.19588	2.57847	0.00992379	0.0694161
ABCC3_30114	Abcc3	1.19411	4.65722	3.20513e-06	0.000159749
IYD_29824	Iyd	1.17608	2.9869	0.00281824	0.0295332
ABCC5_32060	Abcc5	1.17471	4.35315	1.34194e-05	0.000539465
CAT_29095	Cat	1.12794	7.59036	3.19023e-14	2.82495e-11
OASL1_29900	Oasl1	1.12655	2.56878	0.0102058	0.0706035
ALDH1A1_29991	Aldh1a1	1.11802	2.83371	0.00460105	0.0445271
HJURP_30097	Hjurp	1.11782	2.90657	0.00365417	0.036357
NR1I3_30612	Nr1i3	1.10581	4.87627	1.08111e-06	6.60221e-05
SOCS3_31487	Socs3	1.10121	2.38504	0.0170773	0.0994768
TSKU_31948	Tsku	1.09415	5.27308	1.34155e-07	9.89952e-06
ATP6V0D1_30182	Atp6v0d1	1.04256	2.42026	0.0155095	0.0932778
TALDO1_30506	Taldo1	0.990139	6.04805	1.46612e-09	2.59649e-07
SOD2_30063	Sod2	0.96472	2.39588	0.0165806	0.097881
AKR1B10_30632	Akr1b10	0.956296	2.97569	0.00292326	0.0300994
HSD17B11_31408	Hsd17b11	0.9394	5.3594	8.3499e-08	7.04175e-06
SRXN1_30173	Srxn1	0.922865	3.26377	0.00109939	0.01453
TXNRD1_31483	Txnrd1	0.908732	3.54893	0.0003868	0.00628462
EIF2AK2_30238	Eif2ak2	0.905702	2.46201	0.0138162	0.0859136
APOC3_30821	Apoc3	0.90566	3.43721	0.00058774	0.00889647
TNIP1_29881	Tnip1	0.896814	3.61899	0.000295761	0.00517264
CBR1_30996	Cbr1	0.896229	2.40288	0.0162667	0.0966724
CREB3L3_30039	Creb3l3	0.889304	5.88154	4.06456e-09	6.54394e-07
CYP2B10_30803	Cyp2b10	0.864617	2.86739	0.00413877	0.0404959
ABCB1A_29435	Abcb1a	0.856565	3.81567	0.000135817	0.00300664
LIPA_30123	Lipa	0.856224	3.57034	0.000356514	0.00592116
SLC6A8_29415	Slc6a8	0.855799	4.42011	9.86526e-06	0.000436785
APOA1_31604	Apoa1	0.855166	3.8803	0.000104326	0.00239951
CNDP2_30037	Cndp2	0.85489	3.46393	0.00053235	0.00812751
UGT1A7C_29171	Ugt1a7c	0.841594	2.72092	0.00651006	0.0521688
DUSP6_29846	Dusp6	0.841008	3.07832	0.00208174	0.0233339
RB1_31227	Rb1	0.801181	3.13639	0.0017104	0.0201942
MAOA_30665	Maoa	0.786971	3.80164	0.000143742	0.00310449
GSTP1_30795	Gstp1	0.786458	4.23495	2.286e-05	0.000778558
FMO5_31731	Fmo5	0.786164	5.38739	7.14891e-08	6.63938e-06
ELOVL6_30026	Elovl6	0.781528	2.71106	0.00670687	0.0530262
ALDH2_31423	Aldh2	0.779093	4.60031	4.21857e-06	0.000201921
PFKL_29773	Pfkl	0.77219	2.38194	0.0172216	0.0995846
GCLM_29258	Gclm	0.764957	2.94581	0.00322114	0.0324128
POR_29647	Por	0.752731	3.97008	7.18496e-05	0.00187126
ALDOA_29781	Aldoa	0.750851	3.6909	0.000223458	0.00425531
SQRDL_31359	Sqrdl	0.746125	3.72116	0.000198314	0.00386552
CAR9_30338	Car9	0.745332	3.16081	0.00157329	0.0192158
ALDH3A2_31955	Aldh3a2	0.739572	6.05287	1.4229e-09	2.59649e-07
ATP5E_29480	Atp5e	0.719293	4.51016	6.47783e-06	0.000301901
HOOK2_30538	Hook2	0.718391	5.25372	1.49055e-07	1.0559e-05
AQP3_30918	Aqp3	0.713963	2.65491	0.00793284	0.0597833
CYP2C65_31273	Cyp2c65	0.707845	3.02406	0.00249404	0.0269326
EPHX2_30975	Ephx2	0.706825	4.28866	1.79752e-05	0.000663211
SCP2_29592	Scp2	0.704744	3.90961	9.24467e-05	0.00221247
SULT1B1_29295	Sult1b1	0.700044	4.14957	3.33103e-05	0.00103628
CDA_30848	Cda	0.694119	5.52521	3.29095e-08	3.47106e-06
UGT1A6A_29170	Ugt1a6a	0.69191	3.14703	0.00164937	0.0197367
ABHD6_30544	Abhd6	0.690079	2.78772	0.00530806	0.0469356
ECI1_29682	Eci1	0.68767	3.48905	0.000484742	0.0075305
GXYLT1_29393	Gxylt1	0.687137	2.91971	0.00350356	0.0350554
ACOX1_30274	Acox1	0.677585	5.86236	4.56339e-09	6.73481e-07
NET1_29808	Net1	0.672317	3.6572	0.000254982	0.00465539
COMT_31082	Comt	0.672248	3.9424	8.06694e-05	0.00201219
BPNT1_31681	Bpnt1	0.670054	5.52304	3.3319e-08	3.47106e-06
TPI1_31828	Tpi1	0.667355	4.69728	2.63644e-06	0.000140516
CHMP6_30297	Chmp6	0.667145	3.68183	0.000231569	0.00431694
VPS4A_30895	Vps4a	0.662895	3.05149	0.00227709	0.025048
MAFF_30224	Maff	0.658514	2.47591	0.0132895	0.0834602
VAT1_30537	Vat1	0.650326	4.27253	1.93266e-05	0.00069852
ATP6V1D_31477	Atp6v1d	0.636112	3.63324	0.000279887	0.00500687
FOS_31714	Fos	0.635211	2.703	0.00687174	0.0540882
RAB11A_31941	Rab11a	0.632967	2.71231	0.00668159	0.0530262
CALR_31260	Calr	0.630491	2.47115	0.0134681	0.0842826
OXCT1_30310	Oxct1	0.626513	2.81756	0.00483898	0.0452058
MLEC_30880	Mlec	0.623975	3.58943	0.000331403	0.00569821
PIK3C2B_29644	Pik3c2b	0.615936	2.66239	0.00775885	0.0592281
WIPF2_30352	Wipf2	0.611985	4.00778	6.1292e-05	0.00169606
AP2M1_31610	Ap2m1	0.608946	2.63662	0.00837365	0.0620491
DHFR_31629	Dhfr	0.604637	2.80908	0.00496837	0.0455906
COG4_32061	Cog4	0.595116	3.56944	0.000357743	0.00592116
FAT1_29645	Fat1	0.59331	4.0541	5.03267e-05	0.00143756
CES2C_30444	Ces2c	0.577723	2.38106	0.0172628	0.0995846
NFKBIB_31167	Nfkbib	0.573873	4.0589	4.93047e-05	0.00143145
PBDC1_29398	Pbdc1	0.570362	3.16911	0.00152904	0.0188051
LRRC16A_30234	Lrrc16a	0.564603	2.67572	0.00745687	0.0574179
CES2B_29770	Ces2b	0.560029	3.37095	0.000749094	0.0108438
MAPK3_31707	Mapk3	0.556826	4.41046	1.0315e-05	0.000445558
SH3GL2_30335	Sh3gl2	0.55226	2.7884	0.0052969	0.0469356
PRDX1_29442	Prdx1	0.551201	3.33102	0.000865286	0.0121621
ARF1_31811	Arf1	0.549408	3.2197	0.00128323	0.0164682
LTBR_30584	Ltbr	0.546147	2.61292	0.00897711	0.0641463
FABP2_29125	Fabp2	0.543807	2.87932	0.00398531	0.0394301
SLC9A3R1_31733	Slc9a3r1	0.539322	3.61711	0.000297916	0.00517264
FOXJ3_30348	Foxj3	0.536809	3.67341	0.000239338	0.00441528
ETFB_32121	Etfb	0.525614	2.6594	0.00782792	0.0594989
IQGAP1_31135	Iqgap1	0.52353	2.46176	0.0138257	0.0859136
LAMP1_29317	Lamp1	0.523332	4.3234	1.53639e-05	0.000578927
CS_30610	Cs	0.514754	3.32582	0.000881603	0.0121978
NDUFB10_30599	Ndufb10	0.511219	3.57762	0.000346736	0.00584827
GNPDA1_31631	Gnpda1	0.50438	2.41031	0.0159388	0.0950427
ACAA1A_29428	Acaa1a	0.476636	3.62497	0.000288994	0.00511809
CTNND1_31768	Ctnnd1	0.476086	3.29133	0.00099716	0.0135844
TSG101_30163	Tsg101	0.47189	2.4781	0.0132084	0.0833278
KRT8_31071	Krt8	0.467964	4.03302	5.50637e-05	0.0015479
GPX4_32041	Gpx4	0.467587	2.84815	0.00439747	0.0427907
BECN1_30105	Becn1	0.460997	2.96714	0.00300586	0.0305942
SOD1_30958	Sod1	0.456852	2.75753	0.005824	0.0485931
ALDOB_29517	Aldob	0.452663	2.41401	0.0157778	0.0944005
SLC51A_29138	Slc51a	0.449502	2.63495	0.00841501	0.0620958
TTC17_29841	Ttc17	0.448695	2.76491	0.00569389	0.0482306
TOR1A_29452	Tor1a	0.443812	2.48678	0.0128905	0.0830151
MVP_31033	Mvp	0.426007	3.01172	0.00259773	0.0275484
PAK4_30980	Pak4	0.42322	3.75925	0.000170427	0.00346926
PRKCD_31926	Prkcd	0.421737	2.80699	0.00500062	0.04565
MBNL2_30289	Mbnl2	0.411384	2.44713	0.0144	0.0885498
CTH_30455	Cth	0.407796	2.48205	0.0130627	0.0833278
PFN1_30096	Pfn1	0.401811	3.17587	0.00149385	0.0185008
RPLP0_32164	Rplp0	0.393909	2.47775	0.0132214	0.0833278
MAPK1IP1L_31436	Mapk1ip1l	0.39025	3.04106	0.00235745	0.0257719
SNX7_29060	Snx7	0.378139	2.97745	0.00290662	0.0300994
PSMD8_31614	Psmd8	0.376415	2.81489	0.00487934	0.0452424
RAC1_30873	Rac1	0.350765	2.59828	0.00936929	0.0661076
YKT6_29834	Ykt6	0.343985	2.64489	0.00817167	0.0610634
P4HB_31628	P4hb	0.337572	2.38654	0.0170077	0.0994768
DSC2_30806	Dsc2	0.312815	2.54793	0.0108365	0.0738835
TAX1BP3_31994	Tax1bp3	0.305784	2.61271	0.00898265	0.0641463
COX6B1_29508	Cox6b1	0.292989	2.57661	0.00997751	0.0694161
FIS1_31978	Fis1	0.279959	2.50912	0.0121034	0.0802812
PSMC4_30981	Psmc4	0.273267	2.38387	0.0171318	0.0994768
EIF4G1_29119	Eif4g1	-0.205936	-2.43468	0.0149048	0.0913371
CCT6A_29113	Cct6a	-0.33178	-2.79833	0.00513671	0.0464138
NUDCD3_32115	Nudcd3	-0.386131	-3.09375	0.00197645	0.0227292
COPS7A_30557	Cops7a	-0.395873	-2.50441	0.0122655	0.0805802
MYLK_30723	Mylk	-0.404797	-2.61348	0.00896243	0.0641463
TSC2_30320	Tsc2	-0.446879	-2.78038	0.00542953	0.0472607
CANX_31730	Canx	-0.462009	-3.81119	0.000138301	0.00302384
APOE_31528	Apoe	-0.462122	-2.63916	0.00831109	0.0618443
NME1_31953	Nme1	-0.465313	-3.1472	0.00164842	0.0197367
C920025E04RIK_30312	C920025e04rik	-0.465856	-2.50254	0.0123304	0.0805802
TMED10_29760	Tmed10	-0.46657	-2.55119	0.0107355	0.073692
NUP85_29233	Nup85	-0.478489	-2.38473	0.0170915	0.0994768
TRAP1_30258	Trap1	-0.482176	-2.65782	0.00786473	0.0595233
PAFAH1B3_32132	Pafah1b3	-0.48366	-3.06203	0.0021984	0.0244865
TRIM28_30003	Trim28	-0.511138	-3.64703	0.000265288	0.00479414
HIST1H3C_30792	Hist1h3c	-0.518303	-3.58149	0.000341642	0.00581776
MOB1A_30692	Mob1a	-0.520992	-3.33393	0.000856285	0.0121319
GNAI2_31913	Gnai2	-0.540344	-2.39332	0.0166968	0.0982394
MNAT1_31677	Mnat1	-0.541089	-2.4196	0.0155375	0.0932778
CSRP1_31845	Csrp1	-0.543483	-2.68109	0.00733834	0.0567519
DUSP3_31486	Dusp3	-0.54498	-2.50307	0.0123121	0.0805802
BGN_29835	Bgn	-0.546399	-3.26856	0.00108095	0.0143938
TMEM109_29052	Tmem109	-0.548724	-2.62601	0.00863934	0.0632136
KARS_31281	Kars	-0.56007	-2.47869	0.0131865	0.0833278
MRPS2_31179	Mrps2	-0.561582	-3.23943	0.0011977	0.0155965
CNN3_31195	Cnn3	-0.564409	-4.73623	2.17735e-06	0.00012439
RNASEH2A_29823	Rnaseh2a	-0.569541	-3.05678	0.00223725	0.0247635
FGF1_31461	Fgf1	-0.587899	-2.80339	0.00505682	0.0459263
NDUFV2_31584	Ndufv2	-0.608639	-2.49165	0.0127152	0.082486
C1QA_30183	C1qa	-0.6286	-2.50957	0.0120879	0.0802812
GARS_31586	Gars	-0.629863	-3.13369	0.00172626	0.0202464
RELA_30359	Rela	-0.651493	-2.42453	0.0153283	0.0929671
PTPRK_29229	Ptprk	-0.660214	-2.70121	0.00690886	0.0541398
CDK4_31888	Cdk4	-0.660451	-3.27649	0.00105107	0.0141019
CCT5_30697	Cct5	-0.666348	-2.7892	0.00528388	0.0469356
C1QC_31430	C1qc	-0.668219	-3.18745	0.00143532	0.0179011
HIST1H3A_31343	Hist1h3a	-0.676985	-3.91823	8.9203e-05	0.00216409
LEPREL2_31717	Leprel2	-0.695617	-2.53273	0.0113179	0.0762128
SMAD1_32100	Smad1	-0.698721	-3.0788	0.00207835	0.0233339
XBP1_31868	Xbp1	-0.704257	-2.75639	0.00584435	0.0485931
PRKAB1_31491	Prkab1	-0.70854	-3.99575	6.44905e-05	0.00173049
PDIA5_31085	Pdia5	-0.711558	-2.62466	0.00867358	0.0632136
HNRNPH1_32039	Hnrnph1	-0.717005	-3.08586	0.00202963	0.0230415
HTRA1_30748	Htra1	-0.726188	-2.79218	0.00523546	0.0469356
ERBB2_30377	Erbb2	-0.72645	-2.81874	0.0048213	0.0452058
SNRNP40_30773	Snrnp40	-0.728577	-2.95542	0.00312243	0.031599
SEL1L_32044	Sel1l	-0.744235	-2.51495	0.0119051	0.0798631
PSMD12_32034	Psmd12	-0.746032	-2.49321	0.0126593	0.082425
SPCS3_29472	Spcs3	-0.753059	-4.70935	2.48512e-06	0.000137536
MYL9_29990	Myl9	-0.755679	-3.02517	0.00248495	0.0269326
C1QB_30402	C1qb	-0.763989	-3.87393	0.000107096	0.00243163
CDK19_29897	Cdk19	-0.770531	-3.41857	0.0006295	0.00929038
CAV1_32106	Cav1	-0.796136	-2.7298	0.00633719	0.0514824
MFSD10_30558	Mfsd10	-0.812733	-2.82191	0.00477384	0.0452058
YTHDF1_31271	Ythdf1	-0.81835	-5.75847	8.48778e-09	1.00212e-06
PLAU_31587	Plau	-0.824055	-2.60611	0.0091576	0.065133
VIM_30043	Vim	-0.825985	-3.19319	0.00140709	0.0177997
CALCOCO1_30287	Calcoco1	-0.829853	-3.77846	0.000157801	0.00328783
LYZ2_31340	Lyz2	-0.85345	-2.61409	0.00894652	0.0641463
ELOVL5_31269	Elovl5	-0.85863	-2.7536	0.00589441	0.0487804
TRP53INP2_29494	Trp53inp2	-0.880152	-4.00401	6.22772e-05	0.00169682
FBXO5_29404	Fbxo5	-0.89693	-3.48972	0.000483533	0.0075305
ACTA2_30581	Acta2	-0.900613	-3.93859	8.1961e-05	0.00201601
NUP37_31590	Nup37	-0.913108	-3.10595	0.00189668	0.0219544
KLF2_30857	Klf2	-0.914142	-2.42046	0.0155009	0.0932778
LHFP_30756	Lhfp	-0.918075	-2.77736	0.00548026	0.0473441
SCG2_29080	Scg2	-0.93559	-2.53357	0.0112908	0.0762128
HSPB1_30392	Hspb1	-0.943166	-3.01363	0.00258146	0.0275407
GIMAP6_32133	Gimap6	-0.986609	-2.44865	0.0143391	0.0884826
PGLYRP1_32138	Pglyrp1	-0.989156	-2.72793	0.00637325	0.0515168
C2CD2_31518	C2cd2	-1.00138	-2.73361	0.0062645	0.0511264
L1CAM_30833	L1cam	-1.01315	-2.48036	0.0131251	0.0833278
D030056L22RIK_30499	D030056l22rik	-1.02157	-2.68286	0.00729965	0.0567004
MCM7_31665	Mcm7	-1.04655	-3.68775	0.000226249	0.00426262
POLR3B_30410	Polr3b	-1.06533	-2.81684	0.00484986	0.0452058
CCND2_30507	Ccnd2	-1.06745	-4.3485	1.37075e-05	0.000539465
KLHL21_30190	Klhl21	-1.07685	-3.36947	0.000753124	0.0108438
CKM_31031	Ckm	-1.09002	-2.72657	0.00639961	0.0515168
FBN1_30622	Fbn1	-1.09083	-3.79161	0.000149671	0.00319359
ASS1_30805	Ass1	-1.09929	-3.0171	0.00255209	0.0273924
DCTPP1_30412	Dctpp1	-1.11372	-2.77952	0.00544392	0.0472607
WDR3_31029	Wdr3	-1.13318	-2.98037	0.00287897	0.029992
YARS2_29051	Yars2	-1.15065	-3.50178	0.000462162	0.00730793
IGF1R_30022	Igf1r	-1.15492	-3.70017	0.000215455	0.00414751
LRRC41_31413	Lrrc41	-1.16411	-2.48838	0.0128327	0.0829442
COL6A3_30778	Col6a3	-1.16696	-4.37184	1.23205e-05	0.000507433
HSD17B10_31244	Hsd17b10	-1.18638	-2.50569	0.0122213	0.0805802
ABCC9_30839	Abcc9	-1.24599	-2.97095	0.0029688	0.0303916
SLC35A3_30345	Slc35a3	-1.25865	-3.76396	0.000167243	0.00344404
CYP3A41A_30418	Cyp3a41a	-1.26713	-2.76748	0.00564917	0.0480994
H2-AA_31286	H2-aa	-1.26931	-3.23009	0.00123753	0.0159976
COL6A2_29638	Col6a2	-1.27998	-2.63015	0.00853478	0.0627182
ALDH7A1_30977	Aldh7a1	-1.28992	-2.82046	0.00479545	0.0452058
ALYREF2_29330	Alyref2	-1.30056	-2.87074	0.00409518	0.040292
GOLT1B_31718	Golt1b	-1.31423	-5.11382	3.15712e-07	2.07084e-05
CD74_31435	Cd74	-1.32993	-4.08496	4.40841e-05	0.00130121
IL1R1_30947	Il1r1	-1.35796	-4.14928	3.33529e-05	0.00103628
IFITM3_29087	Ifitm3	-1.36077	-3.43292	0.000597116	0.00892176
FYN_30452	Fyn	-1.36166	-2.5476	0.0108468	0.0738835
CRELD2_31000	Creld2	-1.36598	-2.66386	0.00772506	0.0592255
ZG16_29210	Zg16	-1.3667	-2.76087	0.00576475	0.0483857
REG1_29118	Reg1	-1.37057	-2.60288	0.00924441	0.0654874
PPM1D_31298	Ppm1d	-1.37297	-2.4334	0.0149578	0.0913456
HSPD1_29930	Hspd1	-1.40054	-3.18953	0.00142506	0.0178992
CHIC2_30479	Chic2	-1.40098	-3.32845	0.000873307	0.0121782
NDUFV3_29149	Ndufv3	-1.41646	-3.53048	0.0004148	0.00661811
LUM_29826	Lum	-1.42246	-2.82099	0.00478764	0.0452058
RAP1GAP_30972	Rap1gap	-1.45398	-2.78657	0.00532696	0.0469356
GM6756_31198	Gm6756	-1.46946	-3.08639	0.00202606	0.0230415
ID4_30949	Id4	-1.4771	-3.34849	0.000812534	0.0116048
IFITM2_30327	Ifitm2	-1.50695	-3.89364	9.87511e-05	0.00233184
FCGR3_30920	Fcgr3	-1.55583	-3.46917	0.000522059	0.00803972
ST3GAL2_29891	St3gal2	-1.55731	-3.73531	0.000187485	0.00377314
KRT7_30903	Krt7	-1.57212	-3.43185	0.000599486	0.00892176
TUBB6_30743	Tubb6	-1.57728	-3.30231	0.000958903	0.0131645
LAMA2_32272	Lama2	-1.58817	-2.64654	0.00813196	0.0610242
GADD45G_30550	Gadd45g	-1.60097	-3.9599	7.49796e-05	0.00189698
C730049O14RIK_31254	C730049o14rik	-1.61659	-3.40652	0.000657965	0.00963022
CRYAB_30937	Cryab	-1.62068	-3.28622	0.00101541	0.0137274
HSPB6_30489	Hspb6	-1.63342	-2.75098	0.00594164	0.0488189
PWP1_30231	Pwp1	-1.64283	-3.56527	0.000363484	0.00596047
CLIP3_31112	Clip3	-1.69218	-3.72076	0.000198623	0.00386552
KCNK1_30362	Kcnk1	-1.71269	-3.15769	0.00159027	0.0192902
FLNA_30270	Flna	-1.72813	-5.4043	6.5062e-08	6.40138e-06
GM6453_30766	Gm6453	-1.73322	-4.17801	2.94067e-05	0.000951117
KIF23_31277	Kif23	-1.73354	-2.44901	0.0143251	0.0884826
KAT2A_31329	Kat2a	-1.74724	-3.99031	6.59859e-05	0.00174419
GLUL_29159	Glul	-1.77429	-4.19924	2.67816e-05	0.000894909
MYCBP2_30396	Mycbp2	-1.80323	-3.12652	0.00176886	0.0206095
SLC1A3_31977	Slc1a3	-1.8832	-2.77519	0.00551698	0.0474299
IDI1_31040	Idi1	-1.97789	-2.51185	0.01201	0.0802634
ASPN_29620	Aspn	-1.97941	-2.69766	0.00698282	0.0544783
IGFBP6_29521	Igfbp6	-2.08867	-2.71714	0.00658487	0.0525306
HMGCS2_29615	Hmgcs2	-2.31657	-2.55674	0.0105659	0.0728098
NUCB2_29574	Nucb2	-2.44746	-3.96177	7.43966e-05	0.00189698
ERO1LB_30012	Ero1lb	-2.61393	-4.24715	2.16508e-05	0.000751836
ZBP1_31398	Zbp1	-2.87619	-2.76347	0.00571905	0.0482306
NFIL3_31222	Nfil3	-2.99274	-2.77238	0.00556474	0.0476094
(C) Folpet (6000 ppm)
CYP2A5_31713	Cyp2a5	9.08794	6.35477	2.08743e-10	2.46455e-08
CES1G_30475	Ces1g	3.82391	6.2483	4.14945e-10	4.32275e-08
GSTA2_31572	Gsta2	3.54002	8.36337	6.09532e-17	1.07948e-13
SLC7A11_30093	Slc7a11	3.45263	3.37345	0.000742338	0.0100357
GSTA3_30777	Gsta3	3.42709	3.65777	0.000254421	0.00402303
CBR3_30786	Cbr3	2.93974	5.70459	1.16624e-08	1.03271e-06
ARNT2_31967	Arnt2	2.51831	3.82417	0.000131212	0.00249867
CAPG_29439	Capg	2.49801	5.23415	1.65748e-07	9.78463e-06
GSTA1_31374	Gsta1	2.25961	7.35434	1.91872e-13	4.85436e-11
GM3776_29765	Gm3776	2.2592	6.89387	5.42951e-12	8.01305e-10
EPHX1_29453	Ephx1	2.25866	4.81018	1.50797e-06	6.06959e-05
BNIP3_31290	Bnip3	2.13047	5.72733	1.02022e-08	9.50949e-07
ACAT3_31219	Acat3	2.10139	2.49883	0.0124606	0.0796667
HSD3B2_30890	Hsd3b2	2.04038	5.66507	1.46967e-08	1.22441e-06
TUBB2A_29725	Tubb2a	1.87626	3.97931	6.9117e-05	0.00149276
RAB31_31119	Rab31	1.84209	4.52187	6.12961e-06	0.00020876
FKBP5_29670	Fkbp5	1.79189	4.45758	8.28894e-06	0.000257293
S100A6_32030	S100a6	1.7903	2.71618	0.00660399	0.0510728
GPR17_30332	Gpr17	1.75543	4.01409	5.96752e-05	0.00130475
B4GALT1_31884	B4galt1	1.74748	3.97168	7.13662e-05	0.00152277
UGDH_30314	Ugdh	1.72562	6.62211	3.54119e-11	4.47961e-09
UGT2B36_31076	Ugt2b36	1.70546	2.82714	0.00469663	0.0405743
GCLC_31268	Gclc	1.66817	3.15166	0.00162345	0.0181971
PGM2_30214	Pgm2	1.65228	4.98578	6.17135e-07	2.80243e-05
CPS1_31199	Cps1	1.55976	4.05146	5.08986e-05	0.00112875
TSKU_31948	Tsku	1.54547	7.45265	9.14867e-14	2.70038e-11
SLC47A1_29347	Slc47a1	1.53579	5.33467	9.5717e-08	6.0541e-06
MAFF_30224	Maff	1.46251	5.51089	3.57021e-08	2.52914e-06
YWHAZ_31838	Ywhaz	1.42451	3.30615	0.00094589	0.0124294
PGRMC1_31326	Pgrmc1	1.42361	7.23158	4.77418e-13	1.05688e-10
GSR_30529	Gsr	1.4105	5.09552	3.4778e-07	1.66465e-05
DYNLT3_30548	Dynlt3	1.37961	3.11214	0.00185735	0.0200571
NQO1_29503	Nqo1	1.35331	3.783	0.000154952	0.00274419
POR_29647	Por	1.34298	7.09087	1.33272e-12	2.36024e-10
OPN3_29827	Opn3	1.31392	2.36708	0.0179291	0.0989172
NR1I3_32070	Nr1i3	1.3046	8.14706	3.72885e-16	3.30189e-13
KLF4_29531	Klf4	1.28562	5.23801	1.62313e-07	9.78463e-06
TALDO1_30506	Taldo1	1.26241	7.7121	1.23766e-14	4.3838e-12
HEBP1_29916	Hebp1	1.25603	2.72895	0.00635358	0.0495706
ABCB1A_29435	Abcb1a	1.24837	5.5622	2.66391e-08	2.05121e-06
ZNHIT6_30974	Znhit6	1.24468	2.48714	0.0128773	0.0814489
KAT6A_29325	Kat6a	1.23542	2.41548	0.0157144	0.0921531
TSC22D3_32037	Tsc22d3	1.20785	6.30573	2.86841e-10	3.17497e-08
ABCC3_30114	Abcc3	1.19473	4.66015	3.15981e-06	0.000116584
CAT_29095	Cat	1.19398	8.03537	9.32995e-16	5.50778e-13
ABCC5_32060	Abcc5	1.17933	4.37063	1.23889e-05	0.000353883
FOS_31714	Fos	1.15471	4.91569	8.84714e-07	3.85706e-05
FMO5_31731	Fmo5	1.14387	7.84223	4.42628e-15	1.95974e-12
DDIT4_29434	Ddit4	1.12538	2.36921	0.0178263	0.0988872
AKR1B10_30632	Akr1b10	1.12496	3.50095	0.000463611	0.00684752
SLC11A2_30661	Slc11a2	1.11632	2.44188	0.0146109	0.0883138
TNIP1_29881	Tnip1	1.11001	4.48396	7.32721e-06	0.000242365
ME1_30135	Me1	1.09805	4.56759	4.93365e-06	0.000178316
DBP_31391	Dbp	1.09456	3.93216	8.41868e-05	0.00171373
SLC6A8_29415	Slc6a8	1.07134	5.53353	3.13846e-08	2.31592e-06
UGT2B15_29671	Ugt2b15	1.06655	4.11464	3.87781e-05	0.000953835
APOA1_31604	Apoa1	1.04821	4.7563	1.97176e-06	7.59129e-05
SQRDL_31359	Sqrdl	1.04491	5.21395	1.84863e-07	1.05253e-05
CREB3L3_30039	Creb3l3	1.04344	6.90139	5.14976e-12	8.01305e-10
CAR9_30338	Car9	1.01821	4.31898	1.56751e-05	0.000440645
CBLB_29228	Cblb	0.998091	2.66387	0.00772478	0.0567659
S100A11_29287	S100a11	0.991357	4.40362	1.0646e-05	0.000309082
CRY1_31531	Cry1	0.979201	2.56599	0.0102881	0.0692787
GRB7_31752	Grb7	0.972954	4.45406	8.4263e-06	0.000257293
CIDEC_30722	Cidec	0.972788	3.77652	0.000159034	0.0027886
CNDP2_30037	Cndp2	0.948822	3.84467	0.000120715	0.0023493
GCLM_29258	Gclm	0.93893	3.6171	0.00029792	0.00462821
GSTP1_30795	Gstp1	0.912528	4.91387	8.92939e-07	3.85706e-05
TMC7_31267	Tmc7	0.912191	3.07111	0.00213267	0.0220875
OXCT1_30310	Oxct1	0.90942	4.09024	4.30923e-05	0.0010313
KDM3A_31100	Kdm3a	0.908062	2.51111	0.0120352	0.0780743
EIF2AK2_30238	Eif2ak2	0.890218	2.42011	0.015516	0.0912918
ALDH2_31423	Aldh2	0.882068	5.20869	1.9018e-07	1.05253e-05
SRXN1_30173	Srxn1	0.881432	3.11729	0.00182523	0.0199536
BLVRA_32257	Blvra	0.863728	2.42798	0.0151833	0.089969
GFOD1_31265	Gfod1	0.849657	2.9331	0.00335598	0.030795
EPHX2_30975	Ephx2	0.848835	5.15041	2.59923e-07	1.35389e-05
LIPA_30123	Lipa	0.848243	3.53737	0.000404126	0.0061699
MAOA_30665	Maoa	0.844308	4.07871	4.5287e-05	0.00105531
UGT1A7C_29171	Ugt1a7c	0.842446	2.72387	0.00645229	0.0501184
TXNRD1_31483	Txnrd1	0.839843	3.27992	0.00103837	0.0131354
PLK3_31134	Plk3	0.838259	2.81133	0.00493378	0.0412503
PPARA_30567	Ppara	0.8242	4.26021	2.04231e-05	0.000556452
PFKL_29773	Pfkl	0.822739	2.53921	0.0111103	0.0736945
BPNT1_31681	Bpnt1	0.813975	6.70965	1.95089e-11	2.65772e-09
DUSP6_29846	Dusp6	0.809593	2.96344	0.00304224	0.028507
RAPGEF2_31452	Rapgef2	0.797379	4.52226	6.11819e-06	0.00020876
APOC3_30821	Apoc3	0.789834	2.99755	0.00272157	0.0263383
HSD17B11_31408	Hsd17b11	0.77759	4.4362	9.15621e-06	0.000274841
STRBP_29284	Strbp	0.762387	2.40253	0.0162822	0.0936363
JUN_29880	Jun	0.755878	2.80715	0.00499826	0.0415583
ALDOA_29781	Aldoa	0.751654	3.69543	0.000219513	0.00359961
ALAS1_32020	Alas1	0.742756	3.20004	0.00137406	0.0164098
PDLIM1_31630	Pdlim1	0.727789	2.64531	0.00816162	0.0587974
BTG2_29359	Btg2	0.718858	3.00461	0.00265922	0.0260192
TRIB1_31876	Trib1	0.709405	2.69533	0.00703187	0.0534815
NET1_29808	Net1	0.70228	3.82047	0.000133196	0.0025046
POLD4_32109	Pold4	0.700603	2.37913	0.0173534	0.0978753
TOR1A_29452	Tor1a	0.691826	3.88048	0.00010425	0.00205141
ALDH3A2_31955	Aldh3a2	0.691453	5.65918	1.52101e-08	1.22441e-06
ATP11B_30243	Atp11b	0.690712	3.14393	0.00166696	0.0185672
IQGAP1_31135	Iqgap1	0.690702	3.25181	0.00114673	0.0141032
SULT1B1_29295	Sult1b1	0.686715	4.07065	4.68821e-05	0.00107829
CDKN1A_30669	Cdkn1a	0.668195	3.52195	0.000428388	0.0064844
TPI1_31828	Tpi1	0.665352	4.68326	2.82344e-06	0.00010639
RAB11A_31941	Rab11a	0.657729	2.81951	0.00480966	0.0409515
HOOK2_30538	Hook2	0.653896	4.78215	1.73433e-06	6.82555e-05
NR1I2_30504	Nr1i2	0.652496	3.25868	0.00111932	0.014059
DERA_31847	Dera	0.652137	2.66912	0.00760501	0.0561187
VPS4A_30895	Vps4a	0.651342	2.99859	0.00271234	0.0263383
LAMP1_29317	Lamp1	0.649001	5.36261	8.20258e-08	5.58722e-06
VAT1_30537	Vat1	0.643531	4.22856	2.3519e-05	0.000621674
CDA_30848	Cda	0.641846	5.10918	3.23562e-07	1.63722e-05
BECN1_30105	Becn1	0.635538	4.09089	4.29717e-05	0.0010313
ECI1_29682	Eci1	0.630023	3.1967	0.00139007	0.0164098
ATP5E_29480	Atp5e	0.627401	3.93392	8.35712e-05	0.00171373
KRT8_31071	Krt8	0.620469	5.34773	8.90648e-08	5.84199e-06
ATP6V1D_31477	Atp6v1d	0.612245	3.49703	0.000470472	0.006886
RB1_31227	Rb1	0.610102	2.3875	0.0169633	0.0966722
SLC9A3R1_31733	Slc9a3r1	0.604533	4.0546	5.02211e-05	0.00112875
Sept5_29497	Sept5	0.592829	2.41064	0.0159247	0.0927272
ACOX1_30274	Acox1	0.589714	5.1021	3.35897e-07	1.65242e-05
ARL1_29136	Arl1	0.588579	2.43038	0.0150829	0.0899388
PRDX1_29442	Prdx1	0.588539	3.55676	0.000375464	0.00578214
WIPF2_30352	Wipf2	0.569729	3.73119	0.000190579	0.00321443
ALDOB_29517	Aldob	0.56939	3.03686	0.00239053	0.0240547
SCP2_29592	Scp2	0.559844	3.10565	0.00189864	0.0203788
LRRC16A_30234	Lrrc16a	0.556283	2.63679	0.00836953	0.0592898
MVP_31033	Mvp	0.528772	3.74032	0.000183789	0.00312971
ST14_29699	St14	0.525657	4.52705	5.9812e-06	0.00020876
ERBB3_30519	Erbb3	0.524952	3.19483	0.00139915	0.0164098
CS_30610	Cs	0.523359	3.38156	0.000720746	0.00996879
GLRX_31414	Glrx	0.522507	2.43166	0.0150298	0.089925
LYPLA1_32076	Lypla1	0.521227	3.16655	0.00154259	0.0175124
CTNND1_31768	Ctnnd1	0.503847	3.48331	0.000495261	0.00718941
GPX4_32041	Gpx4	0.500518	3.04887	0.00229705	0.0233798
NDUFB10_30599	Ndufb10	0.50016	3.50074	0.000463977	0.00684752
ARF1_31811	Arf1	0.492596	2.8868	0.00389183	0.0353458
RAC1_30873	Rac1	0.490591	3.6347	0.000278304	0.00436173
FABP2_29125	Fabp2	0.488543	2.58671	0.00968962	0.0662561
TUBA4A_29527	Tuba4a	0.486132	2.97005	0.00297751	0.0281988
MAPK3_31707	Mapk3	0.477989	3.78602	0.000153081	0.00273846
GAPDH_31215	Gapdh	0.477776	2.5776	0.00994888	0.0675076
COMT_31082	Comt	0.452243	2.65132	0.00801774	0.0586753
NFKBIB_31167	Nfkbib	0.451981	3.19626	0.00139223	0.0164098
PFN1_32086	Pfn1	0.450894	3.81037	0.000138757	0.00255977
BSG_32071	Bsg	0.450484	3.1124	0.00185575	0.0200571
PRKCD_31648	Prkcd	0.444232	3.05118	0.00227946	0.0233348
FAT1_29645	Fat1	0.442483	3.02327	0.00250058	0.0248794
RPLP0_32164	Rplp0	0.440222	2.7698	0.00560909	0.0455675
TTC17_29841	Ttc17	0.439472	2.70857	0.00675739	0.0518066
FIS1_31978	Fis1	0.409186	3.66966	0.00024287	0.00387498
MAPK1IP1L_31436	Mapk1ip1l	0.406399	3.16719	0.00153922	0.0175124
DNAJB6_29809	Dnajb6	0.405221	2.71335	0.00666064	0.0512869
ABCF1_29590	Abcf1	0.399509	2.67162	0.0075486	0.0559354
CREBBP_31272	Crebbp	0.39856	2.64285	0.00822121	0.0589464
SNX7_29060	Snx7	0.396677	3.1239	0.00178469	0.0196316
ACAA1A_29428	Acaa1a	0.395946	3.0113	0.00260132	0.0255941
FOXJ3_30348	Foxj3	0.39367	2.69338	0.00707321	0.0535327
CTH_30455	Cth	0.389638	2.37184	0.0176998	0.0988843
TAX1BP3_31994	Tax1bp3	0.385238	3.2929	0.000991605	0.0128185
DSC2_30806	Dsc2	0.376157	3.06492	0.00217728	0.0224183
ATP5A1_30306	Atp5a1	0.368028	2.41059	0.0159269	0.0927272
YKT6_29834	Ykt6	0.354835	2.72894	0.00635377	0.0495706
ACO2_31448	Aco2	0.342252	2.68426	0.00726897	0.0540897
PSMD8_31614	Psmd8	0.31791	2.37744	0.0174332	0.0980131
ATP5B_29541	Atp5b	0.259579	2.36225	0.0181645	0.0999049
HMG20B_30149	Hmg20b	0.258374	2.81106	0.00493793	0.0412503
EIF4G1_29119	Eif4g1	-0.206953	-2.44719	0.0143973	0.0876207
RPN1_29977	Rpn1	-0.297892	-2.57355	0.0100661	0.0680425
JMJD6_30809	Jmjd6	-0.359394	-2.49629	0.0125502	0.0797495
FKBP4_29507	Fkbp4	-0.361316	-3.25361	0.00113949	0.0141032
SLC30A5_30122	Slc30a5	-0.363101	-2.54354	0.0109736	0.0730614
SMARCD2_31908	Smarcd2	-0.401436	-2.36835	0.0178678	0.0988872
CLSTN1_29421	Clstn1	-0.416944	-2.42606	0.0152639	0.0901081
TRIM28_30003	Trim28	-0.425192	-3.03515	0.00240415	0.0240551
HSP90B1_31344	Hsp90b1	-0.425864	-2.95396	0.00313725	0.0292425
SLC6A20A_29754	Slc6a20a	-0.433186	-2.76779	0.00564376	0.0456397
PPIB_30521	Ppib	-0.44174	-2.50484	0.0122506	0.0788938
APOE_31528	Apoe	-0.447256	-2.55472	0.0106273	0.0710226
NME1_31953	Nme1	-0.455895	-3.08456	0.00203856	0.0213627
CYCS_30865	Cycs	-0.472566	-2.75343	0.00589743	0.0470466
NUDCD3_32115	Nudcd3	-0.473212	-3.79125	0.000149891	0.00270875
RBM15B_30261	Rbm15b	-0.476563	-2.99065	0.00278383	0.0266948
TRAP1_30258	Trap1	-0.479639	-2.64508	0.00816723	0.0587974
CSRP1_31845	Csrp1	-0.481457	-2.37527	0.0175363	0.0982812
C920025E04RIK_30312	C920025e04rik	-0.489362	-2.62891	0.00856594	0.0601995
NUP62_30242	Nup62	-0.493468	-2.79323	0.0052185	0.0425897
CNN3_31195	Cnn3	-0.496158	-4.16606	3.09907e-05	0.000782372
MOB1A_30692	Mob1a	-0.496807	-3.18038	0.00147084	0.0170581
MYLK_30723	Mylk	-0.510059	-3.29301	0.000991212	0.0128185
CANX_31730	Canx	-0.513138	-4.23303	2.30569e-05	0.000618693
EIF2S3X_31679	Eif2s3x	-0.51816	-2.87024	0.00410157	0.036076
SRSF1_31766	Srsf1	-0.549405	-2.69512	0.00703624	0.0534815
TM9SF3_29274	Tm9sf3	-0.551786	-2.80276	0.00506677	0.0419311
MRPS2_31179	Mrps2	-0.560685	-3.23516	0.00121574	0.0148488
MNAT1_31677	Mnat1	-0.560806	-2.50865	0.0121193	0.0783328
CALCOCO1_30287	Calcoco1	-0.57288	-2.60988	0.00905736	0.0621728
PRKAB1_31491	Prkab1	-0.58121	-3.28278	0.00102789	0.0131083
HES1_31102	Hes1	-0.581622	-3.48062	0.000500254	0.00720284
FGF1_31461	Fgf1	-0.585701	-2.79373	0.00521039	0.0425897
FZD7_29683	Fzd7	-0.586856	-2.64733	0.008113	0.0587974
BDH1_30459	Bdh1	-0.588674	-2.43223	0.0150061	0.089925
SRRT_30656	Srrt	-0.598892	-2.52409	0.0115998	0.0760862
HNRNPH1_32039	Hnrnph1	-0.611083	-2.63085	0.00851728	0.060096
EIF3I_31685	Eif3i	-0.611877	-2.68856	0.00717605	0.0538508
IGF2BP2_31560	Igf2bp2	-0.614939	-2.51961	0.0117486	0.0764953
RPS6KA1_30178	Rps6ka1	-0.619128	-2.74745	0.00600611	0.0476988
ERBB2_30377	Erbb2	-0.620815	-2.40961	0.0159694	0.0927272
CETN2_30963	Cetn2	-0.63001	-2.38479	0.017089	0.0970018
EIF3G_31266	Eif3g	-0.633788	-2.38722	0.0169763	0.0966722
TMEM109_29052	Tmem109	-0.636345	-3.04523	0.00232505	0.0235295
SDPR_30908	Sdpr	-0.642161	-2.49591	0.0125636	0.0797495
TAB2_29157	Tab2	-0.657247	-2.94096	0.00327196	0.0303385
CDK4_31888	Cdk4	-0.661571	-3.28252	0.00102883	0.0131083
C1QC_31430	C1qc	-0.682099	-3.25445	0.00113612	0.0141032
LEPREL2_31717	Leprel2	-0.693178	-2.52473	0.0115786	0.0760862
PANK2_31061	Pank2	-0.700605	-3.08913	0.00200745	0.0212886
CES2G_31409	Ces2g	-0.701173	-2.4637	0.0137513	0.0860549
RELA_30359	Rela	-0.703033	-2.61658	0.00888155	0.0616832
NR3C1_30651	Nr3c1	-0.708668	-3.74838	0.000177978	0.00306018
PRKAG2_29887	Prkag2	-0.724069	-2.50087	0.012389	0.0794962
RNASEH2A_29823	Rnaseh2a	-0.729073	-3.9118	9.16103e-05	0.00184366
MTA1_30728	Mta1	-0.734602	-3.31931	0.0009024	0.0120162
PSMD12_32034	Psmd12	-0.736306	-2.46167	0.0138292	0.086238
HYOU1_29983	Hyou1	-0.751	-4.48213	7.39002e-06	0.000242365
HSPB1_30392	Hspb1	-0.761342	-2.43406	0.0149304	0.089925
TMEM97_31306	Tmem97	-0.764916	-2.96728	0.00300446	0.0283026
SQLE_31444	Sqle	-0.765135	-2.36845	0.0178626	0.0988872
NUP85_29233	Nup85	-0.768828	-3.82755	0.000129423	0.0024914
KARS_31281	Kars	-0.771664	-3.41355	0.000641233	0.00908499
AW112010_29636	Aw112010	-0.77456	-2.44958	0.0143022	0.0874991
SEL1L_32044	Sel1l	-0.780827	-2.63884	0.00831897	0.0592898
CAV1_32106	Cav1	-0.783272	-2.68644	0.00722182	0.0539656
CNKSR3_29653	Cnksr3	-0.794209	-2.51974	0.0117442	0.0764953
MMP14_31294	Mmp14	-0.795148	-3.94288	8.05078e-05	0.0016774
FASN_31200	Fasn	-0.798954	-2.45759	0.0139873	0.0866135
MCM7_31665	Mcm7	-0.813854	-2.87	0.00410472	0.036076
SPCS3_29472	Spcs3	-0.826946	-5.17146	2.32273e-07	1.24653e-05
XBP1_31868	Xbp1	-0.860603	-3.36803	0.000757063	0.0101573
PDIA5_31085	Pdia5	-0.871732	-3.21374	0.00131017	0.0157844
NDUFS7_31350	Ndufs7	-0.884277	-2.44999	0.014286	0.0874991
FBN1_30622	Fbn1	-0.88678	-3.08603	0.00202846	0.0213627
MFSD10_30558	Mfsd10	-0.887	-3.0798	0.0020714	0.0215792
PRSS8_30429	Prss8	-0.909602	-2.61483	0.00892725	0.0617584
HS2ST1_29856	Hs2st1	-0.912197	-2.98749	0.00281276	0.0267817
ELOVL5_31269	Elovl5	-0.916311	-2.93882	0.00329465	0.0303897
MYL9_29990	Myl9	-0.924737	-3.70148	0.000214342	0.00354766
IFITM3_29087	Ifitm3	-0.943116	-2.38212	0.0172131	0.0973944
TESK1_30758	Tesk1	-0.963573	-2.86922	0.00411482	0.036076
RFNG_30467	Rfng	-0.969189	-3.94393	8.01556e-05	0.0016774
NUP37_31590	Nup37	-0.971763	-3.30568	0.000947468	0.0124294
POLR3B_30410	Polr3b	-0.974546	-2.57842	0.00992527	0.0675076
ACTA2_30581	Acta2	-0.979923	-4.28544	1.82375e-05	0.000504667
GIMAP6_32133	Gimap6	-0.986533	-2.44894	0.0143279	0.0874991
KLHL9_29154	Klhl9	-0.991916	-3.3774	0.000731758	0.00996879
RRAGA_30007	Rraga	-1.00506	-2.42783	0.0151896	0.089969
CCND2_30507	Ccnd2	-1.02166	-4.16332	3.13656e-05	0.000782372
YTHDF1_31271	Ythdf1	-1.02634	-7.21464	5.40781e-13	1.06414e-10
IL1R1_30947	Il1r1	-1.03147	-3.15584	0.00160039	0.0180528
HSPD1_29930	Hspd1	-1.05016	-2.40247	0.0162846	0.0936363
LHFP_30756	Lhfp	-1.05133	-3.17982	0.00147368	0.0170581
DIO1_31911	Dio1	-1.05236	-2.46486	0.0137067	0.0860549
C2CD2_31518	C2cd2	-1.05374	-2.87686	0.00401659	0.0360305
TRP53INP2_29494	Trp53inp2	-1.06131	-4.82648	1.3897e-06	5.72364e-05
SCG2_29080	Scg2	-1.06197	-2.87534	0.00403596	0.0360305
ACD_29743	Acd	-1.09365	-2.81161	0.00492949	0.0412503
EML3_30623	Eml3	-1.14257	-2.55605	0.0105868	0.0710196
LRRC41_31413	Lrrc41	-1.14319	-2.44445	0.0145073	0.087988
SPDEF_31009	Spdef	-1.18451	-3.22772	0.00124783	0.0151363
COL6A3_30778	Col6a3	-1.19128	-4.46383	8.05082e-06	0.000254607
PRKG1_29081	Prkg1	-1.20097	-2.81997	0.00480283	0.0409515
SNRPE_29595	Snrpe	-1.20355	-2.84072	0.00450117	0.0392688
DCTPP1_30412	Dctpp1	-1.24325	-3.10224	0.00192061	0.0204904
TUBB6_30743	Tubb6	-1.24454	-2.61203	0.00900062	0.0620237
GM6756_31198	Gm6756	-1.24861	-2.62321	0.00871067	0.0609747
GOLT1B_31718	Golt1b	-1.25896	-4.90213	9.48033e-07	3.99754e-05
KAT2A_31329	Kat2a	-1.26039	-2.88333	0.0039349	0.0355547
CYP3A41A_30418	Cyp3a41a	-1.26208	-2.75657	0.00584106	0.0468078
IFITM2_30327	Ifitm2	-1.31228	-3.39226	0.000693195	0.00966855
CD74_31435	Cd74	-1.31889	-4.05105	5.0988e-05	0.00112875
MEIS2_31840	Meis2	-1.32235	-3.1739	0.00150408	0.0172969
CKM_31031	Ckm	-1.3516	-3.37849	0.000728864	0.00996879
H2-AA_31286	H2-aa	-1.38269	-3.51857	0.000433887	0.00651197
MYCBP2_30396	Mycbp2	-1.38527	-2.4068	0.0160928	0.0931384
RAP1GAP_30972	Rap1gap	-1.40392	-2.69079	0.00712828	0.05372
PLAU_31587	Plau	-1.41684	-4.47304	7.71164e-06	0.000248315
WDR3_31029	Wdr3	-1.41691	-3.72301	0.000196866	0.00328914
CIRH1A_30233	Cirh1a	-1.44367	-2.74369	0.0060752	0.048032
FBL_29301	Fbl	-1.44705	-2.44909	0.0143218	0.0874991
ZG16_29210	Zg16	-1.48019	-2.99013	0.00278856	0.0266948
CRYAB_30937	Cryab	-1.48745	-3.02021	0.00252596	0.0249915
FYN_30452	Fyn	-1.50409	-2.81376	0.00489652	0.0412503
E2F2_30940	E2f2	-1.50624	-3.43867	0.000584586	0.00834921
DHX29_29269	Dhx29	-1.51666	-2.61765	0.00885382	0.0616832
GM6453_30766	Gm6453	-1.52126	-3.67137	0.000241257	0.00387498
PWP1_30231	Pwp1	-1.56207	-3.3922	0.00069334	0.00966855
ST3GAL2_29891	St3gal2	-1.59147	-3.81834	0.000134352	0.0025046
NDUFV3_29149	Ndufv3	-1.64049	-4.08419	4.42313e-05	0.00104445
ALDH7A1_30977	Aldh7a1	-1.68421	-3.68025	0.000233002	0.00378575
FCGR3_30920	Fcgr3	-1.70544	-3.80173	0.00014369	0.00262345
KRT7_30903	Krt7	-1.72061	-3.75451	0.000173678	0.00301553
SLC1A3_31977	Slc1a3	-1.78849	-2.63765	0.00834817	0.0592898
KIF23_31277	Kif23	-1.7945	-2.53525	0.0112368	0.074255
DNTTIP2_31355	Dnttip2	-1.84785	-2.73827	0.00617632	0.0486145
CXCL10_29431	Cxcl10	-1.85087	-2.45979	0.0139018	0.0863863
ID4_30949	Id4	-1.85979	-4.20768	2.58002e-05	0.000666546
CLIP3_31112	Clip3	-1.91558	-4.20621	2.59693e-05	0.000666546
NUCB2_29574	Nucb2	-1.92846	-3.13068	0.001744	0.0193039
FLNA_30270	Flna	-1.93891	-6.06072	1.35512e-09	1.33328e-07
RIMS1_31703	Rims1	-1.95132	-2.76543	0.00568481	0.0457627
IGF1_32078	Igf1	-2.04396	-2.80024	0.00510638	0.0420624
HSPB6_30489	Hspb6	-2.32111	-3.9001	9.61549e-05	0.00191337
HMGCS2_29615	Hmgcs2	-2.62143	-2.89245	0.00382252	0.0348953
ERO1LB_30012	Ero1lb	-2.71772	-4.41564	1.00712e-05	0.000297267
GABRA4_31983	Gabra4	-3.27968	-2.48068	0.0131131	0.0826449
(D) Captan (12000 ppm)
CYP2A5_31713	Cyp2a5	8.78291	6.14067	8.21732e-10	1.22501e-07
CYP1A1_29719	Cyp1a1	5.13131	2.82703	0.00469815	0.0384178
CYP2C29_31205	Cyp2c29	5.06265	5.55477	2.77971e-08	2.3422e-06
SLC7A11_30093	Slc7a11	4.42663	4.32541	1.52247e-05	0.000500093
GABARAP_30872	Gabarap	4.37799	3.94363	8.02584e-05	0.00189684
CBR3_30786	Cbr3	4.34839	8.43874	3.20774e-17	3.1083e-14
GSTA3_30777	Gsta3	3.85821	4.11891	3.80676e-05	0.00108493
DPPA5A_30060	Dppa5a	3.68897	3.23661	0.00120957	0.0158151
GSTA2_31572	Gsta2	3.60471	8.51622	1.64842e-17	3.1083e-14
CES1G_30475	Ces1g	3.50566	5.72813	1.01546e-08	9.8398e-07
CYP2C38_32195	Cyp2c38	3.18303	2.59203	0.00954105	0.064427
HGF_30161	Hgf	2.66642	2.71875	0.00655286	0.0482431
GM3776_29765	Gm3776	2.60551	7.95066	1.85513e-15	7.19049e-13
B4GALT1_29184	B4galt1	2.54885	3.4094	0.000651057	0.00990782
GSTA1_31374	Gsta1	2.53793	8.26018	1.45454e-16	9.39633e-14
EPHX1_29453	Ephx1	2.51012	5.34579	9.00222e-08	6.46159e-06
CAPG_29439	Capg	2.3897	5.0065	5.54283e-07	2.98389e-05
TUBB2A_29725	Tubb2a	2.3797	5.04798	4.46508e-07	2.53384e-05
NQO1_29503	Nqo1	2.1775	6.08853	1.13949e-09	1.47222e-07
ARNT2_31967	Arnt2	2.13208	3.23512	0.00121592	0.0158151
GCLC_31268	Gclc	2.11764	4.00336	6.24502e-05	0.0015718
ALDOC_30272	Aldoc	2.05046	2.58176	0.00982973	0.0661459
BNIP3_31290	Bnip3	1.9259	5.17487	2.28071e-07	1.38126e-05
SLC11A2_30661	Slc11a2	1.91454	4.18809	2.81317e-05	0.000851864
CES2A_31253	Ces2a	1.89481	3.32604	0.000880901	0.0125
UGDH_30314	Ugdh	1.84132	7.0661	1.59352e-12	4.41177e-10
ACAA1B_29729	Acaa1b	1.79677	2.49551	0.0125775	0.0786296
GSTM3_29784	Gstm3	1.70803	3.90321	9.4927e-05	0.00216433
NRAP_31309	Nrap	1.70032	2.76861	0.00562962	0.0432357
HSPA1B_32188	Hspa1b	1.69957	2.44336	0.0145512	0.0884019
ARSA_31597	Arsa	1.60828	3.18887	0.00142829	0.0180777
ME1_30135	Me1	1.59089	6.6201	3.58955e-11	6.95656e-09
HSD3B2_30890	Hsd3b2	1.57448	4.3667	1.26138e-05	0.000429029
PGM2_30214	Pgm2	1.55598	4.69466	2.67055e-06	0.000117625
FDFT1_29306	Fdft1	1.54112	2.78342	0.00537899	0.0418654
CPS1_31199	Cps1	1.50773	3.91545	9.02349e-05	0.00210693
GSR_30529	Gsr	1.47741	5.33725	9.43661e-08	6.53148e-06
KLF4_29531	Klf4	1.47397	6.00616	1.89966e-09	2.158e-07
OASL1_29900	Oasl1	1.46848	3.34961	0.000809258	0.011792
PFKL_29773	Pfkl	1.46325	4.52483	6.04435e-06	0.000221018
HAT1_30881	Hat1	1.46225	3.54194	0.000397189	0.00707989
CYP2B10_30803	Cyp2b10	1.39934	4.64081	3.47041e-06	0.00014621
HEBP1_29916	Hebp1	1.39153	3.02416	0.00249326	0.0250359
PGRMC1_31326	Pgrmc1	1.37267	6.97253	3.11284e-12	7.54084e-10
SRXN1_30173	Srxn1	1.36342	4.82252	1.41757e-06	6.54105e-05
CMPK2_29189	Cmpk2	1.3602	2.43259	0.0149915	0.0902282
ABCB1A_29435	Abcb1a	1.34993	6.01485	1.80054e-09	2.158e-07
IYD_29824	Iyd	1.34541	3.41755	0.000631866	0.0097187
YWHAZ_31838	Ywhaz	1.32777	3.08023	0.00206839	0.0231707
NR1I3_32070	Nr1i3	1.29325	8.0756	6.71438e-16	3.25312e-13
MAFF_30224	Maff	1.29131	4.86366	1.15232e-06	5.44682e-05
ZNHIT6_30974	Znhit6	1.28246	2.56248	0.0103928	0.069214
UGT1A5_31476	Ugt1a5	1.28184	3.09995	0.00193551	0.0219357
RALB_29215	Ralb	1.26043	2.54179	0.0110287	0.0721952
RAB31_31119	Rab31	1.24845	3.05422	0.00225644	0.0241056
ALDH1A1_29991	Aldh1a1	1.24694	3.16098	0.00157241	0.0192869
TSKU_31948	Tsku	1.24418	5.99746	2.00433e-09	2.158e-07
UGT2B15_29671	Ugt2b15	1.21382	4.68309	2.82587e-06	0.000121701
OSGIN1_30257	Osgin1	1.20273	4.62222	3.79652e-06	0.00015413
HJURP_30097	Hjurp	1.20053	3.12223	0.00179486	0.020829
DYNLT3_30548	Dynlt3	1.18325	2.66694	0.0076546	0.0543393
ABCC3_30114	Abcc3	1.18213	4.6106	4.01501e-06	0.000154493
9630033F20RIK_31540	9630033f20rik	1.17195	2.73658	0.00620818	0.046131
POR_29647	Por	1.16061	6.12599	9.01234e-10	1.24757e-07
BHLHE40_32105	Bhlhe40	1.15509	2.95177	0.00315953	0.0292975
G0S2_29985	G0s2	1.15412	2.72099	0.00650877	0.048145
UGT1A7C_29171	Ugt1a7c	1.13157	3.65932	0.000252886	0.0048524
DUSP6_29846	Dusp6	1.11927	4.09767	4.17324e-05	0.0011233
DBP_31391	Dbp	1.10238	3.96022	7.488e-05	0.00183156
MTHFD1L_32017	Mthfd1l	1.0835	2.53344	0.0112949	0.072965
GSTM2_29098	Gstm2	1.0791	2.91637	0.00354127	0.031773
HSP90AA1_31761	Hsp90aa1	1.07392	2.44598	0.0144457	0.0880372
ALAS1_32020	Alas1	1.07115	4.6168	3.89698e-06	0.00015413
LIPA_30123	Lipa	1.06062	4.42383	9.69682e-06	0.000341681
CBR1_30996	Cbr1	1.05907	2.84001	0.00451115	0.0373616
MEIS2_31424	Meis2	1.04868	2.45061	0.0142614	0.0871879
GPR17_30332	Gpr17	1.04789	2.38896	0.0168962	0.0963081
CAT_29095	Cat	1.02662	6.90832	4.90416e-12	1.05603e-09
TXNRD1_31483	Txnrd1	1.02505	4.0035	6.24123e-05	0.0015718
LDLR_30685	Ldlr	1.02503	3.33931	0.000839864	0.0120567
RUVBL1_29584	Ruvbl1	0.986627	2.56056	0.0104504	0.0693592
SLC16A3_30962	Slc16a3	0.978274	3.44364	0.000573937	0.00927242
BLOC1S2_30208	Bloc1s2	0.967409	2.57674	0.00997363	0.066882
ELOVL6_30026	Elovl6	0.940747	3.26463	0.00109606	0.0148543
HSD17B11_31408	Hsd17b11	0.932251	5.31863	1.04552e-07	6.98699e-06
SAT1_30100	Sat1	0.926179	2.47135	0.0134604	0.0830773
AKR1B10_30632	Akr1b10	0.919865	2.86232	0.00420546	0.0359631
APOA1_31604	Apoa1	0.914889	4.15131	3.30573e-05	0.000985616
CES2C_30444	Ces2c	0.901189	3.71439	0.000203692	0.00419953
OXCT1_30310	Oxct1	0.893062	4.01661	5.90421e-05	0.00152565
SLC47A1_29347	Slc47a1	0.877527	3.04377	0.0023363	0.0243427
TNIP1_29881	Tnip1	0.872262	3.51985	0.000431788	0.00759868
CYP2C65_31273	Cyp2c65	0.854663	3.65145	0.000260763	0.00495449
TALDO1_30506	Taldo1	0.850077	5.19227	2.07745e-07	1.29874e-05
PTGER4_29247	Ptger4	0.848148	4.98665	6.14352e-07	3.21788e-05
ALDOA_29781	Aldoa	0.837804	4.11923	3.8014e-05	0.00108493
SQLE_31444	Sqle	0.835542	2.59888	0.00935272	0.0635985
MAOA_30665	Maoa	0.818967	3.95624	7.61389e-05	0.00183156
CAR9_30338	Car9	0.818353	3.47073	0.000519054	0.00866935
APOC3_30821	Apoc3	0.809967	3.07389	0.00211286	0.0233985
FMO5_31731	Fmo5	0.806905	5.52984	3.20522e-08	2.58822e-06
JUN_29880	Jun	0.806625	2.9956	0.00273906	0.0265415
ALDH2_31423	Aldh2	0.804266	4.74905	2.04378e-06	9.21126e-05
ABCC5_32060	Abcc5	0.793223	2.93827	0.00330051	0.0303122
ALDH3A2_31955	Aldh3a2	0.785308	6.42751	1.29714e-10	2.09489e-08
ATP5E_29480	Atp5e	0.777901	4.87814	1.0709e-06	5.18852e-05
ABHD6_30544	Abhd6	0.776135	3.13592	0.00171317	0.020451
CREB3L3_30039	Creb3l3	0.770651	5.09669	3.45636e-07	2.02983e-05
ECI1_29682	Eci1	0.748481	3.79823	0.000145733	0.00313812
FABP2_29125	Fabp2	0.737428	3.90451	9.44173e-05	0.00216433
UGT1A6A_29170	Ugt1a6a	0.729512	3.31823	0.000905908	0.0126306
ATG3_29318	Atg3	0.729334	3.06366	0.00218648	0.0236571
IQGAP1_31135	Iqgap1	0.722296	3.40017	0.000673451	0.0100396
HOOK2_30538	Hook2	0.719024	5.25852	1.45216e-07	9.38097e-06
SLC6A8_29415	Slc6a8	0.714205	3.68874	0.000225367	0.00454959
CIDEC_30722	Cidec	0.712935	2.76623	0.00567093	0.0432687
CTH_30455	Cth	0.703354	4.28359	1.83905e-05	0.000574852
CES2B_29770	Ces2b	0.700197	4.21483	2.49961e-05	0.000768928
ARF1_31811	Arf1	0.699309	4.09843	4.15965e-05	0.0011233
BPNT1_31681	Bpnt1	0.678034	5.58885	2.28572e-08	2.01351e-06
ACOX1_30274	Acox1	0.667373	5.77405	7.73896e-09	7.89374e-07
PRDX1_29442	Prdx1	0.654426	3.95495	7.65514e-05	0.00183156
VAT1_30537	Vat1	0.654284	4.29881	1.71715e-05	0.000545548
PNKP_29493	Pnkp	0.652773	2.98971	0.00279243	0.026835
ARL1_29136	Arl1	0.651743	2.69124	0.00711877	0.0510969
ATP6V1D_31477	Atp6v1d	0.650326	3.71451	0.000203594	0.00419953
ACAT2_32053	Acat2	0.644503	2.81787	0.00483431	0.0392004
ATAD3A_29624	Atad3a	0.642528	2.41096	0.0159107	0.0934633
SQRDL_31359	Sqrdl	0.632217	3.15263	0.00161808	0.0196266
0610010K14RIK_31873	0610010k14rik	0.629796	3.03306	0.00242089	0.0246931
GCLM_29258	Gclm	0.62616	2.41086	0.0159148	0.0934633
INSIG1_31324	Insig1	0.623964	3.02089	0.00252032	0.0251772
TOR1A_29452	Tor1a	0.619184	3.47171	0.000517153	0.00866935
TPI1_31828	Tpi1	0.618103	4.3506	1.35765e-05	0.000453643
GM5620_31287	Gm5620	0.609839	3.13474	0.00172007	0.020451
EPHX2_30975	Ephx2	0.59879	3.63314	0.000279993	0.00521756
MLEC_30880	Mlec	0.596104	3.42908	0.000605623	0.00962047
GXYLT1_29393	Gxylt1	0.592625	2.51796	0.0118037	0.0747867
NDUFB10_30599	Ndufb10	0.591952	4.14354	3.41992e-05	0.00100421
GSTP1_30795	Gstp1	0.591891	3.18721	0.00143651	0.0180777
DERA_31847	Dera	0.591503	2.42034	0.0155062	0.0922802
FABP1_29382	Fabp1	0.589128	3.10551	0.00189953	0.0217828
COPS5_29173	Cops5	0.587738	3.07429	0.00211001	0.0233985
CDA_30848	Cda	0.580399	4.61983	3.84062e-06	0.00015413
SCP2_29592	Scp2	0.576616	3.19861	0.00138091	0.0176067
ETFB_32121	Etfb	0.571221	2.89041	0.00384743	0.0340471
FOXJ3_30348	Foxj3	0.565353	3.86931	0.000109145	0.00243131
FAT1_29645	Fat1	0.561629	3.83761	0.000124238	0.0027077
TUBA4A_29527	Tuba4a	0.557448	3.40589	0.000659499	0.00990782
GAPDH_31215	Gapdh	0.55721	3.00618	0.00264551	0.0262923
RBM6_29425	Rbm6	0.557181	2.43478	0.0149009	0.0899624
COG4_32061	Cog4	0.55444	3.32517	0.00088364	0.0125
CHMP6_30297	Chmp6	0.55193	3.04492	0.0023274	0.0243427
QDPR_30038	Qdpr	0.543109	2.84129	0.00449309	0.0373616
FIS1_29489	Fis1	0.531571	2.39222	0.0167466	0.0957373
PSMD14_30229	Psmd14	0.530221	2.54567	0.0109068	0.071652
SLC9A3R1_31733	Slc9a3r1	0.528013	3.54127	0.000398198	0.00707989
SOD1_30958	Sod1	0.520673	3.14293	0.00167267	0.0201344
COPB2_29270	Copb2	0.517492	2.67284	0.00752123	0.0535888
PBDC1_29398	Pbdc1	0.51302	2.84999	0.00437204	0.0367563
COMT_31082	Comt	0.512192	3.00282	0.0026749	0.0263145
GALE_29920	Gale	0.50925	3.09797	0.0019485	0.0219546
MVP_31033	Mvp	0.486959	3.44354	0.000574143	0.00927242
WIPF2_30352	Wipf2	0.486004	3.18245	0.00146034	0.0181419
PFN1_32086	Pfn1	0.481733	4.07097	4.6817e-05	0.00124289
ALDOB_29517	Aldob	0.479726	2.55843	0.0105146	0.0695472
KRT8_31071	Krt8	0.476837	4.10955	3.96433e-05	0.00111295
ABCF1_29590	Abcf1	0.476264	3.18508	0.00144715	0.018094
CLTB_30121	Cltb	0.470981	2.62151	0.00875402	0.0603747
SULT1B1_29295	Sult1b1	0.464994	2.75609	0.00584965	0.0439404
GPX4_32041	Gpx4	0.460429	2.80457	0.00503838	0.0398663
DNAJB6_29809	Dnajb6	0.447675	2.99755	0.00272159	0.0265047
CS_30610	Cs	0.438707	2.83441	0.00459105	0.0377011
ARPP19_31951	Arpp19	0.435831	3.24999	0.00115411	0.0153809
BPGM_30927	Bpgm	0.42711	2.86214	0.00420788	0.0359631
LAMP1_29317	Lamp1	0.416231	3.43833	0.000585304	0.00937453
STUB1_30764	Stub1	0.405721	3.46415	0.000531918	0.00873608
PSMD8_31614	Psmd8	0.39446	2.94998	0.0031779	0.0293275
NFKBIB_31167	Nfkbib	0.390387	2.75944	0.00578998	0.0436614
BECN1_30105	Becn1	0.382012	2.45872	0.0139434	0.0855139
MAPK1IP1L_31436	Mapk1ip1l	0.376203	2.93164	0.00337175	0.0306581
P4HB_31628	P4hb	0.372922	2.63658	0.00837465	0.0585923
MAPK3_31707	Mapk3	0.360985	2.85816	0.0042611	0.0362194
PSMC4_30981	Psmc4	0.355555	3.10282	0.00191686	0.0218523
SNX7_29060	Snx7	0.352181	2.77305	0.00555329	0.0428776
ACAA1A_29428	Acaa1a	0.311808	2.3712	0.0177303	0.0993099
ATP5B_29541	Atp5b	0.265078	2.41199	0.0158657	0.0934633
YAP1_29373	Yap1	-0.337916	-2.41883	0.0155705	0.0922802
SLC30A5_30122	Slc30a5	-0.339813	-2.38018	0.0173044	0.0976528
TCTA_32125	Tcta	-0.365566	-2.69244	0.00709321	0.0510969
HSP90B1_31344	Hsp90b1	-0.380115	-2.63659	0.00837432	0.0585923
TRIM28_30003	Trim28	-0.380265	-2.71438	0.00664001	0.0485598
IRF6_29460	Irf6	-0.382267	-2.78179	0.00540607	0.0419079
NUDCD3_32115	Nudcd3	-0.389231	-3.11881	0.00181582	0.0209468
ARPC3_30321	Arpc3	-0.409131	-2.81143	0.00493224	0.0394987
CLSTN1_29421	Clstn1	-0.413952	-2.40858	0.0160145	0.0937648
HIST1H3C_30792	Hist1h3c	-0.414138	-2.8618	0.0042124	0.0359631
PPIB_30521	Ppib	-0.422947	-2.39824	0.0164739	0.0947974
EIF2S3X_31679	Eif2s3x	-0.430974	-2.38769	0.0169545	0.0963574
ARNT_31093	Arnt	-0.438662	-2.96343	0.00304227	0.0286772
2610528J11RIK_32135	2610528j11rik	-0.43915	-3.0419	0.00235092	0.024364
CANX_31730	Canx	-0.445511	-3.67518	0.000237679	0.00474868
TSC2_30320	Tsc2	-0.448388	-2.78999	0.00527093	0.0411898
MOB1A_30692	Mob1a	-0.46937	-3.00443	0.00266081	0.0263094
PPP1R13B_30284	Ppp1r13b	-0.496583	-3.32021	0.000899488	0.0126306
APOE_31528	Apoe	-0.499551	-2.85286	0.00433282	0.0366682
ST6GALNAC2_31378	St6galnac2	-0.503752	-2.39451	0.0166425	0.0954239
CDK4_31888	Cdk4	-0.50736	-2.51782	0.0118084	0.0747867
POLR2C_31526	Polr2c	-0.514272	-2.46544	0.0136844	0.0841919
H2AFV_29822	H2afv	-0.535484	-3.25251	0.0011439	0.0153809
EVL_29224	Evl	-0.536217	-2.7178	0.00657182	0.0482431
GNAI2_31913	Gnai2	-0.53718	-2.37955	0.0173336	0.0976528
FGF1_31461	Fgf1	-0.538003	-2.56615	0.0102835	0.0687223
ERBB3_30519	Erbb3	-0.559812	-3.40618	0.000658785	0.00990782
SMARCD2_31908	Smarcd2	-0.566942	-3.34163	0.000832867	0.0120455
FZD7_29683	Fzd7	-0.584168	-2.63442	0.00842823	0.0587551
BGN_29835	Bgn	-0.588077	-3.51775	0.000435218	0.00759868
RELB_29454	Relb	-0.592537	-2.5395	0.0111012	0.0721952
C1QB_30402	C1qb	-0.600248	-3.0454	0.00232369	0.0243427
HIST1H3A_31343	Hist1h3a	-0.600481	-3.47556	0.000509781	0.00866628
NUP85_29233	Nup85	-0.615364	-3.06512	0.00217583	0.0236571
NOTCH1_31178	Notch1	-0.618083	-2.96283	0.00304825	0.0286772
PRKAB1_31491	Prkab1	-0.618657	-3.49171	0.00047994	0.00830468
MTA1_30728	Mta1	-0.633746	-2.864	0.00418328	0.0359631
ACE_29814	Ace	-0.650225	-2.61103	0.009027	0.0618174
NOSIP_30062	Nosip	-0.66308	-3.24885	0.00115873	0.0153809
RNASEH2A_29823	Rnaseh2a	-0.664111	-3.56338	0.000366104	0.00663093
NDUFV2_31584	Ndufv2	-0.674912	-2.76263	0.0057337	0.0434059
SDPR_30908	Sdpr	-0.695383	-2.70191	0.00689427	0.0498548
MRPS2_31179	Mrps2	-0.705447	-4.06734	4.75519e-05	0.00124535
RFNG_30467	Rfng	-0.710164	-2.89197	0.00382838	0.0340339
ACTA2_30581	Acta2	-0.715164	-3.12855	0.00175673	0.0207594
CETN2_30963	Cetn2	-0.715433	-2.70584	0.0068132	0.0494531
HES1_31102	Hes1	-0.721882	-4.314	1.60329e-05	0.000517864
C920025E04RIK_30312	C920025e04rik	-0.723489	-3.88596	0.000101927	0.00229692
CDKN1B_31384	Cdkn1b	-0.733183	-4.608	4.06561e-06	0.000154493
C1QA_30183	C1qa	-0.734214	-2.93039	0.00338537	0.0306581
MCM7_31665	Mcm7	-0.74537	-2.62858	0.00857419	0.0595584
C1QC_31430	C1qc	-0.748874	-3.57131	0.000355205	0.00655607
SEL1L_32044	Sel1l	-0.749235	-2.53195	0.0113429	0.0730317
IGFBP3_31859	Igfbp3	-0.749345	-2.4202	0.015512	0.0922802
PDIA5_31085	Pdia5	-0.75046	-2.76776	0.00564429	0.0432357
PLAU_31587	Plau	-0.764722	-2.41902	0.0155623	0.0922802
VIM_30043	Vim	-0.765238	-2.95929	0.00308344	0.0288681
HNRNPH1_32039	Hnrnph1	-0.780394	-3.35844	0.000783842	0.0115082
XBP1_31868	Xbp1	-0.79832	-3.12432	0.00178216	0.0208062
TRP53INP2_29494	Trp53inp2	-0.799317	-3.63744	0.000275363	0.0051811
KLHL9_29154	Klhl9	-0.80333	-2.73634	0.00621269	0.046131
PPARGC1A_29737	Ppargc1a	-0.80405	-2.95225	0.00315468	0.0292975
CCND2_30507	Ccnd2	-0.810717	-3.30493	0.000949991	0.0131506
YARS2_29051	Yars2	-0.816125	-2.48743	0.0128668	0.0799228
FBXO5_29404	Fbxo5	-0.838918	-3.26512	0.00109418	0.0148543
ARID4B_32082	Arid4b	-0.843531	-2.43144	0.0150389	0.0902336
ADCK3_30248	Adck3	-0.85026	-2.39836	0.0164685	0.0947974
NUP37_31590	Nup37	-0.859632	-2.92481	0.00344662	0.0310677
MFSD10_30558	Mfsd10	-0.861008	-2.9892	0.00279705	0.026835
SPCS3_29472	Spcs3	-0.874233	-5.46626	4.59634e-08	3.42604e-06
CIRBP_29906	Cirbp	-0.890887	-2.93683	0.00331588	0.0303122
GOLT1B_31718	Golt1b	-0.892323	-3.4795	0.000502352	0.00861556
HSPB1_30392	Hspb1	-0.897383	-2.86782	0.00413312	0.0359631
NDUFS7_31350	Ndufs7	-0.910835	-2.52247	0.0116533	0.0743186
ERBB2_30377	Erbb2	-0.919598	-3.56704	0.00036103	0.00660071
CDK19_29897	Cdk19	-0.926133	-4.10633	4.01994e-05	0.00111295
C2CD2_31518	C2cd2	-0.927656	-2.53356	0.0112911	0.072965
ZFP369_31841	Zfp369	-0.927996	-2.39964	0.0164112	0.0947974
MAP4K4_31738	Map4k4	-0.934013	-2.49998	0.0124202	0.0781503
ITGAE_32126	Itgae	-0.940922	-3.67238	0.000240304	0.00474898
KLHL24_30498	Klhl24	-0.956287	-4.90174	9.49921e-07	4.8446e-05
LOC100504120_31209	Loc100504120	-0.967655	-2.38301	0.0171717	0.0973064
IFITM2_30327	Ifitm2	-0.982054	-2.53964	0.0110968	0.0721952
LHFP_30756	Lhfp	-0.983371	-2.97442	0.00293541	0.0280238
PRKAG2_29887	Prkag2	-0.99296	-3.42195	0.000621733	0.00963935
RRAGA_30007	Rraga	-0.995862	-2.40517	0.0161647	0.0943593
LYZ2_31340	Lyz2	-0.996903	-3.05325	0.00226379	0.0241056
IL1R1_30947	Il1r1	-1.0042	-3.07217	0.00212509	0.0234001
POLR3B_30410	Polr3b	-1.01126	-2.67466	0.00748054	0.0534956
CYBB_29167	Cybb	-1.01727	-2.64756	0.00810752	0.0573445
AQP1_29391	Aqp1	-1.02882	-2.96548	0.00302207	0.0286772
YTHDF1_31271	Ythdf1	-1.05985	-7.4447	9.71616e-14	3.13832e-11
ALOX5AP_32052	Alox5ap	-1.06705	-2.52234	0.0116578	0.0743186
CAV1_32106	Cav1	-1.07126	-3.66995	0.000242595	0.00474898
PRKCH_31675	Prkch	-1.10641	-2.50425	0.0122711	0.0774641
SNRPE_29595	Snrpe	-1.11137	-2.62365	0.0086992	0.0602109
ID4_30949	Id4	-1.12339	-2.55145	0.0107276	0.0707145
GADD45G_30550	Gadd45g	-1.17258	-2.9039	0.00368552	0.0329149
KLF2_30857	Klf2	-1.18159	-3.12671	0.00176776	0.0207632
IGF1R_30022	Igf1r	-1.18358	-3.79191	0.000149491	0.00314906
PRKG1_29081	Prkg1	-1.20166	-2.82117	0.00478492	0.0389629
DIO1_31911	Dio1	-1.21069	-2.83454	0.00458914	0.0377011
FLNA_30270	Flna	-1.22533	-3.83739	0.000124347	0.0027077
FBN1_30622	Fbn1	-1.25717	-4.36662	1.26185e-05	0.000429029
GM6453_30766	Gm6453	-1.25774	-3.03758	0.00238484	0.0244541
CLIP3_31112	Clip3	-1.2728	-2.8074	0.00499438	0.0398318
CYP3A41B_30917	Cyp3a41b	-1.27329	-2.49206	0.0127004	0.0791428
SCG2_29080	Scg2	-1.28236	-3.4685	0.000523382	0.00866935
ZFP395_31148	Zfp395	-1.29551	-2.60279	0.00924682	0.0630998
KCNK1_30362	Kcnk1	-1.29871	-2.39801	0.0164844	0.0947974
CKM_31031	Ckm	-1.30636	-3.26527	0.0010936	0.0148543
COL6A3_30778	Col6a3	-1.3471	-5.04328	4.57608e-07	2.53384e-05
TNFRSF13B_31653	Tnfrsf13b	-1.34957	-3.15222	0.00162036	0.0196266
2010309G21RIK_29518	2010309g21rik	-1.35847	-3.04725	0.00230943	0.0243427
ALYREF2_29330	Alyref2	-1.37662	-3.03789	0.00238239	0.0244541
CRYAB_30937	Cryab	-1.38077	-2.80448	0.00503985	0.0398663
KRT7_30903	Krt7	-1.40152	-3.06219	0.00219725	0.0236571
PIK3CG_30588	Pik3cg	-1.4242	-2.86369	0.00418738	0.0359631
CALCOCO1_30287	Calcoco1	-1.42629	-6.48569	8.83271e-11	1.55616e-08
LRAT_29065	Lrat	-1.43138	-2.59762	0.00938722	0.0636099
LPIN1_31736	Lpin1	-1.43487	-2.74627	0.00602764	0.0451026
CHIC2_30479	Chic2	-1.44193	-3.42423	0.000616536	0.00963586
RGS2_31856	Rgs2	-1.44216	-2.79481	0.00519305	0.0407455
BBC3_31767	Bbc3	-1.44466	-3.02892	0.0024543	0.0248149
RAP1GAP_30972	Rap1gap	-1.46784	-2.81316	0.00490577	0.0394987
CYP3A41A_30418	Cyp3a41a	-1.48207	-3.23655	0.00120985	0.0158151
FYN_30452	Fyn	-1.52331	-2.84933	0.00438117	0.0367563
ATMIN_30404	Atmin	-1.53394	-2.63875	0.00832128	0.0585923
SLC27A1_29146	Slc27a1	-1.55	-3.70489	0.000211482	0.00431424
RPIA_29995	Rpia	-1.56092	-2.3764	0.0174826	0.0982064
ARHGAP9_31094	Arhgap9	-1.5617	-2.84406	0.00445433	0.0372091
H2-AA_31286	H2-aa	-1.57093	-3.99692	6.4171e-05	0.0015944
ZG16_29210	Zg16	-1.57236	-3.17633	0.00149152	0.0184112
MYCBP2_30396	Mycbp2	-1.61445	-2.80187	0.00508074	0.0400263
GIMAP4_30112	Gimap4	-1.62585	-2.43635	0.0148363	0.0898521
FCGR3_30920	Fcgr3	-1.64227	-3.66103	0.000251204	0.0048524
E2F8_30772	E2f8	-1.69617	-3.20942	0.00133002	0.0170701
GLT28D2_31316	Glt28d2	-1.71017	-3.02841	0.00245844	0.0248149
ALDH7A1_30977	Aldh7a1	-1.73623	-3.79298	0.000148849	0.00314906
NUCB2_29574	Nucb2	-1.77463	-2.88205	0.003951	0.0346472
CD74_31435	Cd74	-1.78852	-5.49346	3.94141e-08	3.05538e-06
ASPN_29620	Aspn	-1.81267	-2.47219	0.0134286	0.0830773
ST3GAL2_29891	St3gal2	-1.86002	-4.44799	8.66772e-06	0.000311075
SLC1A3_31977	Slc1a3	-1.8757	-2.76448	0.00570129	0.0433298
PXMP2_29105	Pxmp2	-1.87629	-2.52358	0.0116167	0.0743186
ATP1A2_29833	Atp1a2	-1.87996	-2.4007	0.0163636	0.0947974
GLUL_29159	Glul	-2.0682	-4.89342	9.90963e-07	4.92432e-05
IGF1_32078	Igf1	-2.23811	-3.06231	0.00219639	0.0236571
RIMS1_31703	Rims1	-2.38838	-3.37671	0.000733585	0.0108526
HMGCS2_29615	Hmgcs2	-2.71752	-2.99788	0.00271863	0.0265047
ERO1LB_30012	Ero1lb	-2.83265	-4.6012	4.20064e-06	0.000156555
GNMT_32228	Gnmt	-2.88007	-2.49845	0.0124737	0.0782333
(E) Folpet (16000 ppm)
FCER2A_30020	Fcer2a	21.1127	6.22885	4.69871e-10	3.28363e-08
CYP2A5_31713	Cyp2a5	8.73628	6.10819	1.00769e-09	6.59771e-08
PPP1R27_31422	Ppp1r27	6.7584	3.25599	0.00112997	0.0116654
PHPT1_29619	Phpt1	6.13965	3.09348	0.00197823	0.0178328
NACA_29898	Naca	6.12791	2.3298	0.0198166	0.0972472
FRS2_31536	Frs2	5.64667	3.19908	0.00137869	0.013558
HSD3B3_31113	Hsd3b3	5.57619	2.90015	0.00372987	0.0288196
STXBP2_29515	Stxbp2	5.4541	2.8427	0.00447332	0.0332123
CCNE2_29384	Ccne2	5.39044	2.61528	0.00891549	0.054663
GDNF_29292	Gdnf	5.20728	2.58251	0.00980857	0.0592324
HSPA8_31960	Hspa8	5.10656	2.48423	0.0129831	0.0719419
CYP1A1_29719	Cyp1a1	4.89079	2.69451	0.00704921	0.0460326
IRS1_32241	Irs1	4.87964	2.45887	0.0139377	0.0757139
SLC7A11_30093	Slc7a11	4.83087	4.72052	2.35237e-06	7.13745e-05
CBR3_30786	Cbr3	4.68847	9.09884	9.13034e-20	3.78605e-17
CES1G_30475	Ces1g	4.3818	7.16012	8.06055e-13	1.05551e-10
GSTA3_30777	Gsta3	4.21333	4.49898	6.82801e-06	0.000168199
DPPA5A_30060	Dppa5a	4.21092	3.69696	0.000218198	0.00311998
GSTA2_31572	Gsta2	4.19013	9.8995	4.18351e-23	3.46952e-20
LSS_31472	Lss	4.045	3.73827	0.000185292	0.00274408
GABARAP_30872	Gabarap	3.31204	2.97812	0.00290023	0.0236588
GSTA1_31374	Gsta1	3.05432	9.94091	2.76286e-23	3.43699e-20
GM3776_29765	Gm3776	3.00636	9.17386	4.56381e-20	2.27095e-17
CAPG_29439	Capg	2.97086	6.22711	4.75124e-10	3.28363e-08
EPHX1_29453	Ephx1	2.8176	6.00079	1.96361e-09	1.1632e-07
ACAT3_31219	Acat3	2.75287	3.27571	0.00105398	0.0111115
AKR1B8_30048	Akr1b8	2.73496	2.91575	0.00354831	0.0277616
ARNT2_31967	Arnt2	2.62501	3.98706	6.68967e-05	0.0011974
HSPA1B_32188	Hspa1b	2.59064	3.72463	0.0001956	0.00286266
NQO1_29503	Nqo1	2.49078	6.96515	3.28065e-12	4.08113e-10
BNIP3_31290	Bnip3	2.43566	6.55128	5.70449e-11	4.73092e-09
UGDH_30314	Ugdh	2.33359	8.95525	3.38978e-19	9.37087e-17
B4GALT1_29184	B4galt1	2.30078	3.07574	0.00209978	0.0183953
GSR_30529	Gsr	2.12048	7.6611	1.84346e-14	3.8221e-12
GCLC_31268	Gclc	2.09378	3.95864	7.53789e-05	0.00131149
ACAA1B_29729	Acaa1b	2.04816	2.84604	0.00442667	0.0331733
ALDOC_30272	Aldoc	2.01505	2.53748	0.0111653	0.0644531
PGM2_30214	Pgm2	2.00873	6.06286	1.3372e-09	8.31738e-08
UGT2B36_31076	Ugt2b36	1.96102	3.25219	0.00114518	0.0117736
TUBB2A_29725	Tubb2a	1.85865	3.942	8.08058e-05	0.00136765
HSD3B2_30890	Hsd3b2	1.73267	4.80822	1.52278e-06	4.92036e-05
HJURP_30097	Hjurp	1.70131	4.42827	9.49932e-06	0.000218836
ABCC3_30114	Abcc3	1.68679	6.58328	4.60166e-11	3.94791e-09
S100A6_32030	S100a6	1.6829	2.55293	0.0106821	0.0623876
ME1_30135	Me1	1.66403	6.92523	4.35277e-12	5.0028e-10
NRAP_31309	Nrap	1.63586	2.66414	0.00771845	0.0488639
PGRMC1_31326	Pgrmc1	1.62947	8.27805	1.25212e-16	3.11527e-14
PFKL_29773	Pfkl	1.59214	4.92615	8.38643e-07	2.92606e-05
GSTM3_29784	Gstm3	1.59132	3.63648	0.000276387	0.003764
CES2A_31253	Ces2a	1.59055	2.79133	0.00524916	0.0374209
PRKAA2_30919	Prkaa2	1.54026	2.53229	0.011332	0.0649189
UGT2B15_29671	Ugt2b15	1.5336	5.91824	3.25413e-09	1.79917e-07
OSGIN1_30257	Osgin1	1.53145	5.88694	3.93418e-09	2.03922e-07
ABCB1A_29435	Abcb1a	1.51808	6.76467	1.3361e-11	1.32969e-09
TALDO1_30506	Taldo1	1.50245	9.17927	4.34016e-20	2.27095e-17
SLC11A2_30661	Slc11a2	1.49956	3.28028	0.00103705	0.0109795
ALDOA_29781	Aldoa	1.49939	7.38015	1.58111e-13	3.026e-11
RAB31_31119	Rab31	1.4764	3.61865	0.000296142	0.0039613
SRXN1_30173	Srxn1	1.45729	5.1548	2.53896e-07	9.5711e-06
KLF4_29531	Klf4	1.45047	5.91082	3.40418e-09	1.80834e-07
YWHAZ_31838	Ywhaz	1.44573	3.35594	0.000790964	0.0088695
NR1I3_32070	Nr1i3	1.44512	9.02618	1.77773e-19	5.52873e-17
MAFF_30224	Maff	1.43767	5.41743	6.04621e-08	2.54966e-06
ALDH1A1_29991	Aldh1a1	1.41911	3.59826	0.000320356	0.0042396
TXNRD1_31483	Txnrd1	1.41375	5.52268	3.33871e-08	1.56731e-06
GPR17_30332	Gpr17	1.41015	3.22124	0.00127639	0.0128051
TSKU_31948	Tsku	1.40029	6.75184	1.45984e-11	1.39696e-09
CAT_29095	Cat	1.34391	9.04509	1.49544e-19	5.3152e-17
BLVRA_32257	Blvra	1.3207	3.71705	0.00020156	0.00291559
IYD_29824	Iyd	1.31568	3.3422	0.000831186	0.00920618
GSTM2_29098	Gstm2	1.3001	3.51411	0.000441223	0.00546151
UGT1A7C_29171	Ugt1a7c	1.29895	4.20132	2.65364e-05	0.000536768
POR_29647	Por	1.29595	6.84252	7.78126e-12	8.4173e-10
ARSA_31597	Arsa	1.29479	2.56572	0.0102962	0.0611385
CBR1_30996	Cbr1	1.29351	3.46966	0.000521118	0.0063246
FDFT1_29306	Fdft1	1.29007	2.32947	0.019834	0.0972472
PSME2_29433	Psme2	1.27662	2.68846	0.00717815	0.0466299
ALDH3A2_31955	Aldh3a2	1.26431	10.3512	4.13251e-25	1.02817e-21
GCLM_29258	Gclm	1.24152	4.78472	1.71222e-06	5.39242e-05
DUSP6_29846	Dusp6	1.23106	4.50746	6.56068e-06	0.000165273
PRDX1_29442	Prdx1	1.21639	7.35191	1.95399e-13	3.28458e-11
AKR1B10_30632	Akr1b10	1.20055	3.73635	0.000186707	0.00274868
BHLHE40_31406	Bhlhe40	1.19357	2.73807	0.0061801	0.0423366
UGT2B5_31589	Ugt2b5	1.16792	2.62041	0.00878243	0.0544905
9630033F20RIK_31540	9630033f20rik	1.1638	2.71824	0.00656305	0.0436601
DBP_31391	Dbp	1.15329	4.14331	3.42334e-05	0.000660794
ABCC5_32060	Abcc5	1.13607	4.21031	2.55021e-05	0.000524374
UGT1A5_31476	Ugt1a5	1.13164	2.73643	0.00621095	0.0423366
GSTP1_30795	Gstp1	1.1235	6.05	1.44841e-09	8.7894e-08
DDIT3_29142	Ddit3	1.11889	2.96473	0.0030295	0.0242718
ALDH2_31423	Aldh2	1.10379	6.51852	7.10062e-11	5.59455e-09
ARID4B_31769	Arid4b	1.10023	3.44725	0.000566333	0.00677421
ACAT2_32053	Acat2	1.09281	4.78065	1.74727e-06	5.43401e-05
MTHFD1L_32017	Mthfd1l	1.08224	2.53075	0.011382	0.0649504
GXYLT1_29393	Gxylt1	1.0801	4.5913	4.40497e-06	0.000120435
OXCT1_30310	Oxct1	1.07278	4.82521	1.39859e-06	4.63959e-05
FMO5_31731	Fmo5	1.06968	7.33337	2.24428e-13	3.28458e-11
VAT1_30537	Vat1	1.05271	6.92294	4.4237e-12	5.0028e-10
AMDHD2_30866	Amdhd2	1.04952	2.79007	0.00526967	0.0374598
SQRDL_31359	Sqrdl	0.998669	4.98317	6.25504e-07	2.22322e-05
POLD4_32109	Pold4	0.990721	3.3676	0.000758262	0.00865393
UGT1A6A_29170	Ugt1a6a	0.986324	4.48741	7.20926e-06	0.000174142
PSPH_31239	Psph	0.981385	2.41138	0.0158922	0.0825467
BLOC1S2_30208	Bloc1s2	0.961343	2.5613	0.0104281	0.0613209
PTGER4_29247	Ptger4	0.95965	5.64409	1.66053e-08	8.10078e-07
ATP6V1D_31477	Atp6v1d	0.956234	5.46282	4.68637e-08	2.08209e-06
SOD1_30958	Sod1	0.952642	5.7519	8.82437e-09	4.48062e-07
HSD17B11_31408	Hsd17b11	0.950281	5.42158	5.90734e-08	2.53404e-06
ALAS1_32020	Alas1	0.948702	4.08888	4.33462e-05	0.000810867
DERA_31847	Dera	0.948069	3.88283	0.000103248	0.00166805
RB1_31227	Rb1	0.945912	3.70572	0.00021079	0.00303147
CAR9_30338	Car9	0.940093	3.98756	6.67553e-05	0.0011974
TPI1_31828	Tpi1	0.925752	6.51652	7.19556e-11	5.59455e-09
SLC47A1_29347	Slc47a1	0.919984	3.1921	0.0014124	0.0137806
HOOK2_30538	Hook2	0.915804	6.69959	2.09007e-11	1.91531e-09
CPS1_31199	Cps1	0.911661	2.36443	0.0180579	0.09169
BPNT1_31681	Bpnt1	0.891585	7.34956	1.98855e-13	3.28458e-11
SLC16A3_30962	Slc16a3	0.890175	3.13355	0.00172708	0.0161541
AP2M1_31610	Ap2m1	0.880896	3.81501	0.00013618	0.00209146
GLOD4_31927	Glod4	0.867817	2.64809	0.00809484	0.0507304
SRD5A1_29150	Srd5a1	0.862906	2.54135	0.0110426	0.0642851
MAOA_30665	Maoa	0.86044	4.15667	3.22913e-05	0.000642726
ELOVL6_30026	Elovl6	0.859936	2.98427	0.00284252	0.0234178
ECI1_29682	Eci1	0.855999	4.34537	1.39039e-05	0.000306132
ETFB_32121	Etfb	0.843152	4.268	1.97231e-05	0.000408925
AHR_32124	Ahr	0.840832	2.53585	0.0112174	0.0644713
KDM3A_31100	Kdm3a	0.839627	2.32179	0.0202441	0.0979908
COMT_31082	Comt	0.839193	4.92427	8.46768e-07	2.92606e-05
PLK3_31134	Plk3	0.810972	2.71991	0.00653	0.0435567
FABP2_29125	Fabp2	0.806309	4.26922	1.96154e-05	0.000408925
SLC6A8_29415	Slc6a8	0.793768	4.09975	4.1359e-05	0.000785506
KRT8_31071	Krt8	0.791556	6.82267	8.9363e-12	9.26396e-10
CREB3L3_30039	Creb3l3	0.789122	5.21901	1.7988e-07	7.2184e-06
TNIP1_29881	Tnip1	0.787627	3.17844	0.00148071	0.0141692
LIPA_30123	Lipa	0.771905	3.21889	0.00128687	0.0128583
ATG3_29318	Atg3	0.75874	3.18851	0.00143007	0.0138985
XPO7_30381	Xpo7	0.754351	3.38407	0.000714197	0.00824959
ABCF1_29590	Abcf1	0.753589	5.04389	4.56169e-07	1.66904e-05
CES2C_30444	Ces2c	0.753409	3.10527	0.00190104	0.017389
GPX2_31292	Gpx2	0.741449	2.62634	0.00863087	0.053684
CTH_30455	Cth	0.739524	4.50482	6.6428e-06	0.000165273
ACOX1_30274	Acox1	0.732606	6.33875	2.31637e-10	1.73014e-08
CNDP2_30037	Cndp2	0.730523	2.96001	0.00307633	0.0245318
FOS_31714	Fos	0.723226	3.07805	0.00208363	0.0183182
EPHX2_30975	Ephx2	0.719061	4.36295	1.28318e-05	0.00028505
SPCS2_30511	Spcs2	0.713757	2.34679	0.0189357	0.0946027
0610010K14RIK_31873	0610010k14rik	0.713205	3.43776	0.000586537	0.00694906
EIF4EBP1_30076	Eif4ebp1	0.709427	2.49712	0.0125206	0.0700027
PCCB_31069	Pccb	0.693042	3.44735	0.000566115	0.00677421
ATP5E_29480	Atp5e	0.691447	4.33603	1.45078e-05	0.000316626
CDA_30848	Cda	0.690943	5.5002	3.79365e-08	1.71828e-06
ADH5_30159	Adh5	0.685868	3.6798	0.000233415	0.00329964
FAM63A_31044	Fam63a	0.683068	2.97811	0.00290029	0.0236588
BECN1_30105	Becn1	0.682875	4.39572	1.10408e-05	0.000249723
CIDEC_30722	Cidec	0.682665	2.64909	0.00807077	0.0507073
1810009A15RIK_30815	1810009a15rik	0.677916	2.73703	0.00619962	0.0423366
CREG1_32043	Creg1	0.677617	3.05297	0.00226592	0.0197119
S100A11_29287	S100a11	0.675113	2.99845	0.00271355	0.0226646
EIF4B_30073	Eif4b	0.672374	3.86106	0.000112898	0.00178911
ALDOB_29517	Aldob	0.66976	3.57245	0.000353654	0.00462701
COPB2_29270	Copb2	0.667639	3.4489	0.000562885	0.00677421
APOA1_31604	Apoa1	0.660793	2.99833	0.00271465	0.0226646
NDUFB10_30599	Ndufb10	0.652661	4.56985	4.88083e-06	0.000130575
VPS4A_30895	Vps4a	0.652286	3.0031	0.00267248	0.0225395
COPS5_29173	Cops5	0.645977	3.37992	0.000725075	0.0083133
UGT2B35_29092	Ugt2b35	0.643271	2.45213	0.0142012	0.0764818
NFKBIB_31167	Nfkbib	0.641801	4.54214	5.56859e-06	0.00014739
MVP_31033	Mvp	0.635025	4.49372	6.99882e-06	0.000170716
NDUFB6_31712	Ndufb6	0.630981	4.37667	1.20504e-05	0.000270104
GPX4_32041	Gpx4	0.628652	3.82962	0.000128341	0.00198331
PSMG1_32027	Psmg1	0.627585	2.3146	0.0206346	0.0994939
MAT2A_29960	Mat2a	0.626277	2.67122	0.00755768	0.0480908
MRPS16_29202	Mrps16	0.626028	2.61589	0.00889952	0.054663
CRKL_29643	Crkl	0.626026	3.14178	0.00167923	0.0158814
TCP1_29748	Tcp1	0.623843	3.50488	0.000456821	0.00559887
PFN1_32086	Pfn1	0.622337	5.25933	1.44583e-07	5.89709e-06
ATP5A1_30306	Atp5a1	0.621844	4.07414	4.61849e-05	0.000857522
KRT19_31045	Krt19	0.616971	4.50543	6.62401e-06	0.000165273
PSMD8_31614	Psmd8	0.616877	4.61476	3.93548e-06	0.000111267
GAPDH_31215	Gapdh	0.615172	3.31908	0.000903136	0.00964379
DHFR_31629	Dhfr	0.613845	2.85297	0.00433123	0.0325562
ABHD6_30544	Abhd6	0.611315	2.4697	0.0135225	0.073943
CYP2C65_31273	Cyp2c65	0.606309	2.5903	0.00958934	0.0581909
GSTT3_31186	Gstt3	0.605373	2.49034	0.012762	0.0709087
WIPF2_30352	Wipf2	0.603712	3.95401	7.68533e-05	0.00132785
PBDC1_29398	Pbdc1	0.601053	3.34174	0.000832553	0.00920618
ARF1_31811	Arf1	0.600754	3.52082	0.000430207	0.00536525
PNKP_29493	Pnkp	0.596609	2.73296	0.00627684	0.0425391
TXNRD2_31420	Txnrd2	0.592319	2.37091	0.0177444	0.0904671
FABP1_29382	Fabp1	0.584876	3.0831	0.00204856	0.018223
TSC22D3_32037	Tsc22d3	0.57853	3.01973	0.00253	0.021557
RPLP0_32164	Rplp0	0.572476	3.60311	0.000314428	0.0041834
TUBA4A_29527	Tuba4a	0.549788	3.35966	0.000780393	0.00882553
TOR1A_29452	Tor1a	0.549397	3.08065	0.00206546	0.018223
P4HB_31628	P4hb	0.547459	3.87126	0.000108272	0.0017268
NME1_29042	Nme1	0.543333	2.69	0.00714529	0.0465379
PIK3C2B_29644	Pik3c2b	0.538059	2.32583	0.0200274	0.0977025
SKP1A_29544	Skp1a	0.53578	2.52464	0.0115817	0.0656383
PSMD14_30229	Psmd14	0.53388	2.56379	0.0103535	0.0613162
SLC9A3R1_31733	Slc9a3r1	0.533417	3.5776	0.000346768	0.00456487
SNRPB_29336	Snrpb	0.532394	3.19716	0.00138787	0.0135946
ARPP19_31951	Arpp19	0.532302	3.97111	7.154e-05	0.00126235
AXIN1_30430	Axin1	0.529	2.49017	0.0127681	0.0709087
LTBR_30584	Ltbr	0.525798	2.51627	0.0118603	0.0669125
BAD_31862	Bad	0.520488	2.75929	0.00579276	0.0401459
POLR1D_32005	Polr1d	0.514884	2.72078	0.00651281	0.0435567
CES2B_29770	Ces2b	0.514757	3.09851	0.00194496	0.0175966
QDPR_30038	Qdpr	0.513613	2.68736	0.00720185	0.046662
FAT1_29645	Fat1	0.512989	3.50542	0.000455886	0.00559887
TTC17_29841	Ttc17	0.51284	3.16165	0.00156878	0.0148974
CETN3_30290	Cetn3	0.50287	2.94972	0.00318058	0.0251215
NDUFA1_30650	Ndufa1	0.499453	3.1249	0.00177868	0.0165744
COG4_32061	Cog4	0.498082	2.98765	0.00281131	0.0232376
LRRC16A_30234	Lrrc16a	0.497019	2.35575	0.0184853	0.0929119
RHEB_29886	Rheb	0.496125	3.11054	0.00186747	0.0171905
MORF4L2_31902	Morf4l2	0.494948	2.9005	0.00372563	0.0288196
RAC1_30873	Rac1	0.490757	3.63605	0.000276854	0.003764
SNX7_29060	Snx7	0.489454	3.85531	0.000115585	0.00182009
MRPS6_29401	Mrps6	0.484648	2.53761	0.0111613	0.0644531
SH3GL2_30335	Sh3gl2	0.484045	2.4443	0.0145135	0.0774977
SLC51A_29138	Slc51a	0.48346	2.8347	0.00458686	0.0338638
CLTB_30121	Cltb	0.4799	2.67148	0.00755184	0.0480908
CIB1_30318	Cib1	0.477348	2.68147	0.00732989	0.0473682
CDK7_30620	Cdk7	0.471512	2.57026	0.0101621	0.0607461
TAX1BP3_31994	Tax1bp3	0.471404	4.03058	5.56393e-05	0.00101787
FIS1_31978	Fis1	0.469093	4.2081	2.57528e-05	0.000525188
CDKN1A_30669	Cdkn1a	0.46787	2.46557	0.0136795	0.0746373
NDUFB5_30379	Ndufb5	0.464501	3.16325	0.00156018	0.0148725
SCP2_29592	Scp2	0.463694	2.57218	0.0101061	0.0605878
CEBPB_30534	Cebpb	0.451448	2.43882	0.0147355	0.0783374
CHMP6_30297	Chmp6	0.448835	2.47607	0.0132836	0.0730951
PARL_30693	Parl	0.447877	2.89024	0.0038495	0.0294205
BSG_32071	Bsg	0.446001	3.0816	0.00205889	0.018223
PAK4_30980	Pak4	0.44461	3.95051	7.7984e-05	0.00133647
PRKCA_30837	Prkca	0.435968	2.8117	0.00492804	0.0357462
PRDX3_29656	Prdx3	0.43575	3.11834	0.00181872	0.0168842
CASP7_29680	Casp7	0.425586	2.57919	0.00990309	0.0595142
CTNND1_31768	Ctnnd1	0.424501	2.93473	0.00333833	0.0262841
MAPK3_31707	Mapk3	0.421515	3.33859	0.000842054	0.00927005
BANF1_29334	Banf1	0.418478	3.23127	0.00123242	0.0124455
YKT6_29834	Ykt6	0.413695	3.18238	0.0014607	0.0140572
STUB1_30764	Stub1	0.41294	3.52688	0.000420484	0.0052951
FOXJ3_30348	Foxj3	0.406271	2.78002	0.00543559	0.0384197
LAMP1_29317	Lamp1	0.401841	3.31974	0.000901019	0.00964379
GALE_29920	Gale	0.391399	2.38089	0.0172706	0.0887797
MRPS34_30259	Mrps34	0.386546	2.36008	0.0182708	0.0923047
CREBBP_31272	Crebbp	0.381199	2.52783	0.0114769	0.0651929
TIMM17A_29939	Timm17a	0.372943	2.44785	0.014371	0.0772245
NDUFA9_30682	Ndufa9	0.36536	2.78075	0.00542329	0.0384197
CYB561_29096	Cyb561	0.3599	2.32336	0.02016	0.0978688
ATP5B_29541	Atp5b	0.349535	3.18186	0.00146335	0.0140572
PSMC4_30981	Psmc4	0.348419	3.04139	0.00235486	0.020273
VDAC1_31882	Vdac1	0.319585	2.97832	0.00289835	0.0236588
MAPK1IP1L_31436	Mapk1ip1l	0.299819	2.33644	0.0194685	0.0962976
COX6B1_29508	Cox6b1	0.297278	2.6151	0.00892009	0.054663
UQCRFS1_30070	Uqcrfs1	0.295898	2.39705	0.0165275	0.0852479
IDH3G_31742	Idh3g	0.247303	2.6792	0.00737973	0.0475668
CCT6A_29113	Cct6a	-0.30452	-2.56961	0.0101813	0.0607461
ELAVL1_31837	Elavl1	-0.311002	-2.43334	0.0149602	0.0789105
ADCY6_30694	Adcy6	-0.331292	-2.47734	0.0132367	0.0730951
SLC30A5_30122	Slc30a5	-0.3386	-2.37236	0.017675	0.0902987
MYLK_30723	Mylk	-0.363289	-2.34585	0.0189838	0.0946526
EXT1_29408	Ext1	-0.368509	-2.37645	0.01748	0.0894991
PNP2_33339	Pnp2	-0.370836	-2.50109	0.0123812	0.0695114
HSP90B1_31344	Hsp90b1	-0.384341	-2.66628	0.00766957	0.0486783
SENP6_29139	Senp6	-0.394086	-2.32906	0.0198559	0.0972472
CANX_31730	Canx	-0.395207	-3.26044	0.00111241	0.0115802
LOC68395_30716	Loc68395	-0.399707	-2.3593	0.0183097	0.0923047
CLDN7_30337	Cldn7	-0.403879	-3.09086	0.00199575	0.0179257
HYOU1_29983	Hyou1	-0.407346	-2.43312	0.0149692	0.0789105
CNN3_31195	Cnn3	-0.416591	-3.4996	0.00046596	0.00568289
HIST1H3C_30792	Hist1h3c	-0.41818	-2.88979	0.00385494	0.0294205
ERBB3_30519	Erbb3	-0.436404	-2.65547	0.00791987	0.0500118
ARNT_31093	Arnt	-0.436632	-2.9505	0.00317257	0.0251215
TSC2_30320	Tsc2	-0.442588	-2.75512	0.00586703	0.0405477
SLC6A20A_29754	Slc6a20a	-0.450377	-2.87771	0.00400578	0.0303853
PTK2B_31388	Ptk2b	-0.461277	-2.54084	0.0110587	0.0642851
GARS_31586	Gars	-0.473811	-2.35894	0.0183274	0.0923047
WDTC1_31549	Wdtc1	-0.475652	-2.75213	0.00592087	0.0408064
NUDCD3_32115	Nudcd3	-0.47907	-3.83874	0.000123669	0.00193515
RNASEH2A_29823	Rnaseh2a	-0.487655	-2.61904	0.00881769	0.0545732
EVL_29224	Evl	-0.491557	-2.49339	0.0126528	0.0705834
ZNRD1_29627	Znrd1	-0.499911	-2.44005	0.0146852	0.0782375
NR3C1_30651	Nr3c1	-0.515479	-2.72925	0.00634783	0.0428005
DUSP3_31486	Dusp3	-0.521513	-2.39657	0.0165493	0.0852479
IKBKB_31661	Ikbkb	-0.52457	-2.44425	0.0145153	0.0774977
TRIM28_30003	Trim28	-0.528771	-3.77389	0.00016072	0.00239444
APP_29787	App	-0.530499	-3.26125	0.00110924	0.0115802
CTSS_31474	Ctss	-0.533525	-2.70306	0.00687034	0.0454612
POLR2C_31526	Polr2c	-0.541367	-2.59585	0.00943577	0.0575397
PIGF_29840	Pigf	-0.544224	-2.35263	0.0186413	0.093507
SLCO2B1_29172	Slco2b1	-0.550076	-2.67698	0.00742883	0.0477595
SLC27A2_30170	Slc27a2	-0.556373	-3.24988	0.00115452	0.0118208
LPGAT1_30296	Lpgat1	-0.556782	-2.33907	0.0193316	0.0960022
COL1A1_29427	Col1a1	-0.559598	-2.56098	0.0104376	0.0613209
FZD7_29683	Fzd7	-0.560606	-2.52979	0.0114132	0.0649795
MRPS2_31179	Mrps2	-0.562573	-3.24648	0.00116842	0.0118655
ATP1A1_30554	Atp1a1	-0.564065	-2.76019	0.00577672	0.0401459
NOTCH1_31178	Notch1	-0.56763	-2.72201	0.00648861	0.0435139
MMP14_31294	Mmp14	-0.568488	-2.82168	0.00477728	0.0348559
FN1_31533	Fn1	-0.569452	-3.09982	0.00193637	0.0175828
PTPRK_29229	Ptprk	-0.570613	-2.33664	0.019458	0.0962976
SRSF1_31766	Srsf1	-0.576928	-2.83022	0.00465154	0.0341387
PANX1_29076	Panx1	-0.592693	-2.64387	0.00819645	0.0512381
HIST1H3A_31343	Hist1h3a	-0.592956	-3.43212	0.000598876	0.00706163
SPCS3_29472	Spcs3	-0.606067	-3.79162	0.000149666	0.00227055
MOB1A_30692	Mob1a	-0.613864	-3.92857	8.54529e-05	0.0014103
VIM_30043	Vim	-0.625212	-2.41979	0.0155297	0.0814182
ACE_29814	Ace	-0.626009	-2.51384	0.0119424	0.0672235
SMARCD2_31908	Smarcd2	-0.626815	-3.69511	0.000219794	0.00312484
HTRA1_30748	Htra1	-0.635237	-2.44468	0.0144982	0.0774977
SRRT_30656	Srrt	-0.640894	-2.70109	0.00691117	0.04561
FGF1_31461	Fgf1	-0.65202	-3.10975	0.00187244	0.0171905
CDKN1B_31384	Cdkn1b	-0.653173	-4.10814	3.98853e-05	0.000763342
TM7SF3_30526	Tm7sf3	-0.656892	-2.73217	0.00629195	0.0425391
SUMF1_31896	Sumf1	-0.665413	-2.32917	0.0198501	0.0972472
CSRP1_31845	Csrp1	-0.67578	-3.33372	0.000856937	0.0093103
YTHDF1_31271	Ythdf1	-0.683379	-4.81635	1.46205e-06	4.78628e-05
MCM7_31665	Mcm7	-0.685354	-2.41772	0.0156183	0.0816351
AGMAT_29825	Agmat	-0.68809	-2.70792	0.0067707	0.0449213
GNAI2_31913	Gnai2	-0.688412	-3.04859	0.00229915	0.0199313
MTA1_30728	Mta1	-0.694916	-3.14075	0.00168517	0.0158814
PPARGC1A_29737	Ppargc1a	-0.696857	-2.56057	0.0104502	0.0613209
RELB_29454	Relb	-0.697624	-2.9898	0.00279157	0.0231514
DLG3_31930	Dlg3	-0.706316	-3.03261	0.00242447	0.0208003
PANK2_31061	Pank2	-0.72158	-3.18188	0.0014632	0.0140572
DPT_31638	Dpt	-0.723102	-2.39687	0.016536	0.0852479
CDK4_31888	Cdk4	-0.731947	-3.63151	0.000281765	0.00380995
THBD_29993	Thbd	-0.745237	-2.34021	0.019273	0.0959022
HES1_31102	Hes1	-0.759298	-4.53948	5.63924e-06	0.000147689
NUP85_29233	Nup85	-0.761041	-3.78972	0.000150819	0.00227416
YARS2_29051	Yars2	-0.763034	-2.32684	0.0199738	0.0976321
CNKSR3_29653	Cnksr3	-0.774436	-2.45734	0.0139971	0.0758709
LEPREL2_31717	Leprel2	-0.775184	-2.82287	0.00475966	0.0348295
RPA1_30102	Rpa1	-0.775231	-2.79855	0.0051332	0.0368052
SDPR_30908	Sdpr	-0.779872	-3.03028	0.00244326	0.0208895
RFNG_30467	Rfng	-0.789919	-3.2169	0.00129585	0.0128963
CETN2_30963	Cetn2	-0.794893	-3.00664	0.00264155	0.0223543
HIST1H2BF_29400	Hist1h2bf	-0.800121	-2.32055	0.0203113	0.0981255
LYZ2_31340	Lyz2	-0.821748	-2.51723	0.0118281	0.0668823
NUP37_31590	Nup37	-0.82457	-2.80669	0.0050054	0.0362018
HNRNPH1_32039	Hnrnph1	-0.82743	-3.56118	0.000369197	0.00478418
CIRBP_29906	Cirbp	-0.829143	-2.73426	0.00625202	0.0425
SEL1L_32044	Sel1l	-0.834291	-2.81945	0.00481063	0.0349966
VEGFA_29506	Vegfa	-0.844765	-2.96427	0.00303398	0.0242718
XBP1_31868	Xbp1	-0.857112	-3.35454	0.000794975	0.0088695
ECM1_29959	Ecm1	-0.861152	-3.5283	0.000418244	0.0052951
CASC3_30822	Casc3	-0.889159	-2.6741	0.00749306	0.0479247
SPDEF_31009	Spdef	-0.892298	-2.4331	0.0149702	0.0789105
CREB1_29283	Creb1	-0.89305	-2.77585	0.00550578	0.0388056
H2-K1_30014	H2-k1	-0.894418	-4.17891	2.92903e-05	0.000587696
SMARCC1_31846	Smarcc1	-0.896642	-3.13695	0.00170713	0.0160277
C2CD2_31518	C2cd2	-0.897286	-2.45211	0.014202	0.0764818
FPGS_31746	Fpgs	-0.904525	-2.32299	0.0201795	0.0978688
PRC1_29718	Prc1	-0.90464	-2.3764	0.0174826	0.0894991
KLHL24_30498	Klhl24	-0.911163	-4.67191	2.98418e-06	8.83887e-05
BGN_29835	Bgn	-0.911764	-5.45084	5.01325e-08	2.18824e-06
TMEM109_29052	Tmem109	-0.928432	-4.43903	9.03667e-06	0.000212106
C1QA_30183	C1qa	-0.932329	-3.71971	0.00019945	0.00290194
ERBB2_30377	Erbb2	-0.933345	-3.62094	0.000293536	0.00394766
PLAU_31587	Plau	-0.937716	-2.96561	0.00302086	0.0242718
PTPRC_31576	Ptprc	-0.943275	-2.55699	0.0105581	0.0618086
RELA_30359	Rela	-0.948275	-3.52631	0.000421395	0.0052951
PSEN1_29551	Psen1	-0.956881	-2.89734	0.00376346	0.0288997
PDIA5_31085	Pdia5	-0.957944	-3.53046	0.000414842	0.00529296
APOE_31528	Apoe	-0.963873	-5.49997	3.79846e-08	1.71828e-06
HSPB1_30392	Hspb1	-0.964306	-3.08188	0.00205698	0.018223
COL4A2_29932	Col4a2	-0.969119	-5.01126	5.40741e-07	1.9498e-05
ENPP1_30646	Enpp1	-0.979535	-2.47381	0.013368	0.0732591
GAA_29996	Gaa	-0.98444	-3.24743	0.0011645	0.0118655
ADCK3_30248	Adck3	-0.991308	-2.79602	0.00517362	0.0369884
POLR3B_30410	Polr3b	-0.993447	-2.62862	0.00857322	0.0534591
ALOX5AP_32052	Alox5ap	-1.00136	-2.36928	0.0178227	0.0906808
MEIS2_31840	Meis2	-1.00565	-2.41617	0.0156848	0.081811
GOLT1B_31718	Golt1b	-1.00748	-3.92817	8.5593e-05	0.0014103
ELOVL5_31269	Elovl5	-1.00755	-3.23055	0.00123554	0.0124455
DCTPP1_30412	Dctpp1	-1.01539	-2.53576	0.0112203	0.0644713
AQP1_29391	Aqp1	-1.02851	-2.96511	0.00302571	0.0242718
INPP5D_30849	Inpp5d	-1.04285	-2.58275	0.00980168	0.0592324
KLF2_30857	Klf2	-1.04333	-2.76247	0.00573655	0.0400914
CDK19_29897	Cdk19	-1.04525	-4.63392	3.58812e-06	0.000104224
ACTA2_30581	Acta2	-1.05417	-4.6099	4.0286e-06	0.00011262
CNN1_29788	Cnn1	-1.07058	-3.11502	0.00183932	0.017012
SMAD1_32100	Smad1	-1.07118	-4.71592	2.40619e-06	7.21278e-05
PRKAB1_31491	Prkab1	-1.08169	-6.0846	1.16785e-09	7.45028e-08
SLC27A1_29146	Slc27a1	-1.08367	-2.59341	0.009503	0.057808
CLIP3_31112	Clip3	-1.10294	-2.43643	0.0148332	0.0786889
SERPING1_30282	Serping1	-1.10907	-2.69723	0.00699182	0.0459135
PRKAG2_29887	Prkag2	-1.143	-3.9373	8.24032e-05	0.00138527
C920025E04RIK_30312	C920025e04rik	-1.15773	-6.21668	5.07793e-10	3.41456e-08
LOC665506_31202	Loc665506	-1.16	-3.01328	0.00258439	0.0219453
EML3_30623	Eml3	-1.16349	-2.60307	0.00923923	0.0564796
GADD45G_30550	Gadd45g	-1.16526	-2.88642	0.00389651	0.0296468
C1QB_30402	C1qb	-1.18123	-5.98303	2.19019e-09	1.26725e-07
IL18_31667	Il18	-1.19206	-3.44014	0.000581406	0.00692123
4833414E09RIK_29622	4833414e09rik	-1.19262	-3.21006	0.00132707	0.0131544
TJP1_31684	Tjp1	-1.19673	-2.616	0.00889672	0.054663
C730049O14RIK_31254	C730049o14rik	-1.20345	-2.53989	0.0110887	0.0643091
MYL9_29990	Myl9	-1.20891	-4.8371	1.31748e-06	4.42958e-05
FBXO5_29404	Fbxo5	-1.2335	-4.794	1.63488e-06	5.21485e-05
TIAM1_32015	Tiam1	-1.23474	-2.34934	0.0188066	0.0941466
MFSD10_30558	Mfsd10	-1.23833	-4.29382	1.75624e-05	0.000370298
CENPF_31668	Cenpf	-1.23959	-2.95588	0.00311776	0.0247827
CALCOCO1_30287	Calcoco1	-1.24092	-5.64672	1.63533e-08	8.10078e-07
C1QC_31430	C1qc	-1.2417	-5.91024	3.41607e-09	1.80834e-07
BBC3_31767	Bbc3	-1.28418	-2.69492	0.00704046	0.0460326
ALYREF2_29330	Alyref2	-1.28808	-2.84463	0.00444625	0.0332029
FBN1_30622	Fbn1	-1.29914	-4.5136	6.37358e-06	0.000165182
SLC35A3_30345	Slc35a3	-1.30346	-3.89965	9.63299e-05	0.00157469
KLHL9_29154	Klhl9	-1.30408	-4.43626	9.15347e-06	0.00021284
IFITM2_30327	Ifitm2	-1.31854	-3.40864	0.000652871	0.00759039
TSPAN6_30989	Tspan6	-1.32444	-2.8313	0.00463586	0.0341243
COL6A2_29638	Col6a2	-1.32572	-2.72461	0.00643776	0.0432896
CKM_31031	Ckm	-1.33366	-3.33441	0.000854818	0.0093103
COL4A1_29931	Col4a1	-1.35549	-3.00039	0.00269632	0.0226636
F2R_29379	F2r	-1.37487	-2.41945	0.0155441	0.0814182
CCND2_30507	Ccnd2	-1.3769	-5.60598	2.07077e-08	9.90784e-07
PWP1_30231	Pwp1	-1.37744	-2.9937	0.00275621	0.0229346
SESN1_31659	Sesn1	-1.3818	-3.35501	0.00079361	0.0088695
TRP53INP2_29494	Trp53inp2	-1.39471	-6.33559	2.36434e-10	1.73014e-08
AW112010_29636	Aw112010	-1.41373	-4.46533	7.99469e-06	0.000191258
ITGAE_31885	Itgae	-1.41644	-4.59654	4.29557e-06	0.000118749
WDR3_31029	Wdr3	-1.4589	-3.83329	0.000126443	0.00196618
SCG2_29080	Scg2	-1.46058	-3.94916	7.84262e-05	0.00133647
IL1R1_30947	Il1r1	-1.47437	-4.50494	6.6392e-06	0.000165273
HERC6_30292	Herc6	-1.48243	-2.7706	0.00559538	0.039215
CRELD2_31000	Creld2	-1.49461	-2.91441	0.00356362	0.027794
NCK1_29117	Nck1	-1.507	-3.5713	0.000355209	0.00462701
GM6453_30766	Gm6453	-1.57856	-3.80939	0.000139308	0.00212637
TUBB6_30743	Tubb6	-1.58509	-3.32088	0.000897328	0.00964379
GIMAP6_32133	Gimap6	-1.58676	-3.93257	8.40425e-05	0.00140334
EDEM1_30286	Edem1	-1.59874	-3.88091	0.000104067	0.00167045
LRRC41_31413	Lrrc41	-1.60628	-3.42929	0.000605165	0.00710213
PRKG1_29081	Prkg1	-1.60942	-3.77478	0.000160147	0.00239444
PRKCH_31675	Prkch	-1.61009	-3.63948	0.00027319	0.00375523
SEPN1_29733	Sepn1	-1.611	-4.09631	4.19783e-05	0.000791227
IGF1R_30022	Igf1r	-1.61555	-5.16875	2.35663e-07	9.1614e-06
HOXB3_30971	Hoxb3	-1.62178	-2.74624	0.00602825	0.0414318
IGFBP3_31859	Igfbp3	-1.63319	-5.26795	1.37958e-07	5.72066e-06
BMP6_30808	Bmp6	-1.63552	-2.92365	0.00345953	0.0271524
RIMS1_31703	Rims1	-1.64524	-2.33459	0.0195647	0.0965812
CRYAB_30937	Cryab	-1.65641	-3.36035	0.000778432	0.00882553
NDUFV3_29149	Ndufv3	-1.66845	-4.15406	3.26622e-05	0.00064495
ZFP395_31148	Zfp395	-1.68596	-3.3833	0.000716203	0.00824959
LHFP_30756	Lhfp	-1.7112	-5.16078	2.45928e-07	9.41336e-06
GIMAP4_30112	Gimap4	-1.71385	-2.56829	0.0102203	0.0608328
HEXA_30635	Hexa	-1.7209	-2.90148	0.00371409	0.0288196
REG1_29118	Reg1	-1.72165	-3.26959	0.00107704	0.0113066
GLT28D2_31316	Glt28d2	-1.7437	-3.08879	0.00200974	0.0179864
SLC1A3_31977	Slc1a3	-1.74944	-2.58092	0.0098538	0.0593614
GZMB_29755	Gzmb	-1.75243	-2.84185	0.00448527	0.0332123
PIK3CG_30588	Pik3cg	-1.76055	-3.53581	0.000406521	0.00521352
HEATR1_29954	Heatr1	-1.78527	-3.06736	0.0021596	0.018853
COL6A3_30778	Col6a3	-1.79149	-6.69508	2.1555e-11	1.91531e-09
IGLC1_30645	Iglc1	-1.79431	-2.45477	0.0140975	0.076249
KRT7_30903	Krt7	-1.82291	-3.97633	6.99873e-05	0.00124377
LRAT_29065	Lrat	-1.82771	-3.3138	0.000920389	0.00978601
IFITM3_29087	Ifitm3	-1.83259	-4.61794	3.87571e-06	0.000110836
CEACAM1_31909	Ceacam1	-1.84069	-4.14563	3.38875e-05	0.000660794
ARHGAP9_31094	Arhgap9	-1.88319	-3.42571	0.000613205	0.00716269
TBX2_29908	Tbx2	-1.88978	-2.89886	0.00374522	0.0288487
RGS2_31856	Rgs2	-1.89547	-3.66442	0.000247902	0.00345166
KAT2A_31329	Kat2a	-1.89591	-4.32932	1.49571e-05	0.000323593
SOCS2_31706	Socs2	-1.94935	-2.79864	0.00513178	0.0368052
CYP3A41A_30418	Cyp3a41a	-1.97108	-4.30318	1.6836e-05	0.000358017
FCGR3_30920	Fcgr3	-1.97416	-4.39658	1.09969e-05	0.000249723
GLUL_29159	Glul	-2.00634	-4.7479	2.05536e-06	6.31326e-05
CYP3A41B_30917	Cyp3a41b	-2.05463	-4.01825	5.86326e-05	0.0010648
KIF23_31277	Kif23	-2.10188	-2.967	0.00300721	0.0242718
HSPB6_30489	Hspb6	-2.10819	-3.54616	0.000390888	0.00503901
GZMA_30882	Gzma	-2.15743	-4.63308	3.6026e-06	0.000104224
FYN_30452	Fyn	-2.21811	-4.14312	3.42614e-05	0.000660794
ID4_30949	Id4	-2.25838	-5.09462	3.49438e-07	1.29761e-05
DKC1_31185	Dkc1	-2.32581	-2.32379	0.0201365	0.0978688
IGFBP6_29521	Igfbp6	-2.34182	-3.04488	0.00232772	0.0201089
EGR1_30209	Egr1	-2.34681	-2.65022	0.00804402	0.0506671
FLNA_30270	Flna	-2.35162	-7.3397	2.14079e-13	3.28458e-11
CD74_31435	Cd74	-2.36287	-7.2574	3.94592e-13	5.45414e-11
TCF4_31843	Tcf4	-2.36616	-2.39928	0.0164273	0.085148
TCRG-C3_30375	Tcrg-c3	-2.43028	-2.53172	0.0113504	0.0649189
DNTTIP2_31355	Dnttip2	-2.47649	-3.66297	0.00024931	0.00345166
ST3GAL2_29891	St3gal2	-2.50351	-5.94243	2.80833e-09	1.58798e-07
DYRK3_31101	Dyrk3	-2.509	-2.67605	0.00744958	0.0477695
IGTP_30275	Igtp	-2.60084	-2.86299	0.00419658	0.0316397
IIGP1_30403	Iigp1	-2.62142	-3.66889	0.000243607	0.00342427
RRS1_30393	Rrs1	-2.62818	-2.36269	0.018143	0.0919344
H2-Q7_29061	H2-q7	-2.66949	-3.96803	7.24685e-05	0.00126973
ERO1LB_30012	Ero1lb	-2.74278	-4.45646	8.33232e-06	0.000197436
DIO1_31468	Dio1	-2.77654	-2.41467	0.0157495	0.0819765
NFIL3_31222	Nfil3	-2.90992	-2.69713	0.00699406	0.0459135
THY1_31690	Thy1	-2.99197	-3.66255	0.000249718	0.00345166
H2-AA_31286	H2-aa	-3.08845	-7.84407	4.36173e-15	9.86543e-13
CD48_31970	Cd48	-3.09342	-2.47694	0.0132515	0.0730951
CAV1_31411	Cav1	-3.09984	-2.42813	0.015177	0.0798317
DTL_29371	Dtl	-3.53309	-2.80403	0.00504675	0.0363951
ZBP1_31398	Zbp1	-3.67194	-3.52016	0.00043129	0.00536525
G6PC_29672	G6pc	-3.71054	-3.3364	0.000848723	0.00930231
HMGCS2_29615	Hmgcs2	-3.92709	-4.32212	1.54537e-05	0.000331456
C230037E05RIK_29946	C230037e05rik	-4.37242	-3.09994	0.0019356	0.0175828
ELTD1_29724	Eltd1	-4.66966	-2.50042	0.0124048	0.0695114
INPP4B_31932	Inpp4b	-5.20989	-2.4754	0.0133087	0.0730951
KLHL13_29312	Klhl13	-6.56177	-2.75987	0.00578249	0.0401459
CENPI_30714	Cenpi	-6.94911	-2.87161	0.00408381	0.030883
SLC1A2_30225	Slc1a2	-8.31242	-2.77102	0.00558803	0.039215
CSF1R_30684	Csf1r	-8.58634	-2.96434	0.00303337	0.0242718

## Sheet: TableS3
Table S3. Comparisons between lists of genes with significantly different expression associated with each exposure condition. P-values represent the probability of observing the number of overlapping genes between gene sets by chance, out of a total of 2754 genes evaluated, according to Fischer's exact text (see Materials and Methods section for additional details).
Treatment Comparisons	Genes with Altered Expression (all DEGs)		Genes with Increased Expression		Genes with Decreased Expression
	p-value	Number of Overlapping Genes	p-value	Number of Overlapping Genes	p-value	Number of Overlapping Genes
Cr(VI) (180 ppm) vs. Folpet (6000 ppm)	1.03688e-79	158	4.69337e-79	92	5.72777e-48	65
Cr(VI) (180 ppm) vs. Captan (6000 ppm)	1.8202e-71	148	2.72761e-73	88	1.47209e-43	60
Cr(VI) (180 ppm) vs. Folpet (16000 ppm)	1.79065e-81	198	5.36203e-74	104	7.77434e-60	89
Cr(VI) (180 ppm) vs. Captan (12000 ppm)	2.93359e-66	151	2.87865e-73	92	1.93608e-34	55
Captan (6000 ppm) vs. Captan (12000 ppm)	3.35253e-142	207	3.13506e-133	126	7.00574e-75	81
Folpet (6000 ppm) vs. Folpet (16000 ppm)	8.83699e-120	231	4.19326e-110	128	4.73292e-78	101
Captan (6000 ppm) vs. Folpet (6000 ppm)	9.04192e-152	207	4.34549e-130	120	6.42886e-87	87
Captan (12000 ppm) vs. Folpet (16000 ppm)	1.05471e-162	270	3.42316e-149	155	1.31293e-95	113

## Sheet: TableS4
Table S4. Up-regulated canonical pathways associated with oral exposure to Cr(VI), captan, and/or folpet, based on distinct-directional enrichment analysis enabled through Gene Set Enrichment Analysis (GSEA). Statistical values are listed for pathways identified as significantly (p<0.05) associated with at least one exposure condition. Results are organizing such that the first columns listed ref…
Canonical Pathway Name	Significant in Cr(VI) AND Captan (12000 ppm) AND Folpet (16000 ppm)	Significant in Cr(VI) AND Captan (12000 ppm) AND/OR Folpet (16000 ppm)	Significant in Cr(VI) and Captan (12000 ppm) NOT Folpet (16000 ppm)	Significant in Cr(VI) and Folpet (16000 ppm) NOT Captan (12000 ppm)	Significant in Captan (12000 ppm) AND Folpet (16000 ppm) NOT Cr(VI)	Significant in Cr(VI) ONLY	Significant in Captan ONLY	Significant in Folpet ONLY	Significant in Any	Cr(VI) p-value	Captan (12000 ppm) p-value	Folpet (16000 ppm) p-value	Cr(VI) adjusted p-value (FDR)	Captan (12000 ppm) adj p-value	Folpet (16000 ppm) adj p-value	Captan (12000 ppm) % of Genes in Pathway with Up-regulated Expression	Folpet (16000 ppm) % of Genes in Pathway with Up-regulated Expression	Cr(VI) % of Genes in Pathway with Up-regulated Expression	Genes in Pathway from S1500+ List	Significant in Cr(VI) AND Captan (6000 ppm) AND Folpet (6000 ppm)	Significant in Cr(VI) AND Captan (6000 ppm) AND/OR Folpet (6000 ppm)	Significant in Cr(VI) and Captan (6000 ppm) NOT Folpet (6000 ppm)	Significant in Cr(VI) and Folpet (6000 ppm) NOT Captan (6000 ppm)	Significant in Captan (6000 ppm) AND Folpet (6000 ppm) NOT Cr(VI)	Significant in Cr(VI) ONLY	Significant in Captan ONLY	Significant in Folpet ONLY	Significant in Any	Cr(VI) p-value	Captan (6000 ppm) p-value	Folpet (6000 ppm) p-value	Captan (6000 ppm) adjusted p-value (FDR)	Folpet (6000 ppm) adjusted p-value (FDR)	Captan (6000 ppm) % of Genes in Pathway with Up-regulated Expression	Folpet (6000 ppm) % of Genes in Pathway with Up-regulated Expression	Potentially relevant to DNA damage?
REACTOME_BIOLOGICAL_OXIDATIONS	--	--	--	--	YES	--	--	--	YES	0.28246	0.00016348	0.00018238	0.75274	0	0	0.672727	0.618182	0.527273	ADH1C, ALDH1A1, ALDH2, BPNT1, CNDP2, COMT, CYP11A1, CYP11B1, CYP17A1, CYP19A1, CYP1A1, CYP1A2, CYP1B1, CYP26B1, CYP2A6, CYP2B6, CYP2C18, CYP2C8, CYP2C9, CYP2E1, CYP2F1, CYP2W1, CYP3A5, CYP46A1, CYP4A11, CYP51A1, CYP8B1, FMO1, FMO3, GCLC, GCLM, GGT7, GLYAT, GSTA3, GSTA5, GSTM1, GSTP1, MAOA, MAOB, MAT1A, MAT2AT1, PAPSS1, PTGS1, PTGS2, SULT1B1, SULT2A1, SULT4A1, UGDH, UGT1A1, UGT1A3, UGT1A4, UGT1A6,…	--	--	--	--	YES	--	--	--	YES	0.28246	0.00018002	0.00017191	0	0	0.672727	0.636364	no
KEGG_DRUG_METABOLISM_CYTOCHROME_P450	--	--	--	--	YES	--	--	--	YES	0.27304	0.00017209	0.00018702	0.7379	0	0	0.896552	0.758621	0.551724	ADH1C, ADH5, CYP1A2, CYP2A6, CYP2B6, CYP2C18, CYP2C8, CYP2C9, CYP2E1, CYP3A5, FMO1, FMO3, FMO5, GSTA3, GSTA5, GSTM1, GSTM2, GSTM3, GSTP1, GSTZ1, MAOA, MAOB, UGT1A1, UGT1A10, UGT1A3, UGT1A4, UGT1A6, UGT2B15, UGT2B28, UGT2B7	--	--	--	--	YES	--	--	--	YES	0.27304	0.0001865	0.00018318	0	0	0.827586	0.827586	no
REACTOME_PHASE1_FUNCTIONALIZATION_OF_COMPOUNDS	--	--	--	--	YES	--	--	--	YES	0.99147	0.00017209	0.013465	0.99027	0.0044487	0.17046	0.551724	0.517241	0.37931	ADH1C, ALDH1A1, ALDH2, CYP11A1, CYP11B1, CYP17A1, CYP19A1, CYP1A1, CYP1A2, CYP1B1, CYP26B1, CYP2A6, CYP2B6, CYP2C18, CYP2C8, CYP2C9, CYP2E1, CYP2F1, CYP2W1, CYP3A5, CYP46A1, CYP4A11, CYP51A1, CYP8B1, FMO1, FMO3, MAOA, MAOB, PTGS1, PTGS2	--	--	--	--	YES	--	--	--	YES	0.99147	0.0001865	0.023814	0.0055932	0.36043	0.586207	0.551724	no
KEGG_METABOLISM_OF_XENOBIOTICS_BY_CYTOCHROME_P450	--	--	--	--	YES	--	--	--	YES	0.48805	0.0001747	0.00018972	0.80833	0.00063756	0.0013191	0.888889	0.777778	0.62963	ADH1C, ADH5, CYP1A1, CYP1A2, CYP1B1, CYP2B6, CYP2C18, CYP2C8, CYP2C9, CYP2E1, CYP2F1, CYP3A5, EPHX1, GSTA3, GSTA5, GSTM1, GSTM2, GSTM3, GSTP1, GSTZ1, UGT1A1, UGT1A10, UGT1A3, UGT1A4, UGT1A6, UGT2B15, UGT2B28, UGT2B7	--	--	--	--	YES	--	--	--	YES	0.48805	0.00018864	0.00018369	0	0.016887	0.851852	0.851852	no
REACTOME_PHASE_II_CONJUGATION	--	--	--	--	YES	--	--	--	YES	0.14545	0.00017578	0.00019095	0.60231	0	0	0.846154	0.769231	0.692308	BPNT1, CNDP2, COMT, CYP1A2, GCLC, GCLM, GGT7, GLYAT, GSTA3, GSTA5, GSTM1, GSTP1, MAT1A, MAT2AT1, PAPSS1, SULT1B1, SULT2A1, SULT4A1, UGDH, UGT1A1, UGT1A3, UGT1A4, UGT1A6, UGT2B28, UGT2B7	--	--	--	--	YES	--	--	--	YES	0.14545	0.00018598	0.00018093	0	0	0.807692	0.769231	no
KEGG_STEROID_HORMONE_BIOSYNTHESIS	YES	YES	--	--	--	--	--	--	YES	0.043749	0.00017621	0.0001938	0.38763	0.0041144	0.0012425	0.761905	0.761905	0.761905	COMT, CYP11A1, CYP11B1, CYP17A1, CYP19A1, CYP1A1, CYP1B1, CYP3A5, HSD11B2, HSD17B12, HSD17B6, HSD3B1, HSD3B2, SRD5A1, UGT1A1, UGT1A10, UGT1A3, UGT1A4, UGT1A6, UGT2B15, UGT2B28, UGT2B7	YES	YES	--	--	--	--	--	--	YES	0.043749	0.00057493	0.0013069	0.0051737	0.023364	0.666667	0.714286	no
REACTOME_GLYCOLYSIS	YES	YES	--	--	--	--	--	--	YES	0.0011827	0.00018379	0.00099542	0.061188	0.014613	0.015286	0.909091	1	0.909091	ALDOA, ALDOB, ALDOC, ENO2, ENO3, GAPDH, PFKL, PFKP, PGAM1, PGAM2, PPP2CA, TPI1	YES	YES	--	--	--	--	--	--	YES	0.0011827	0.0017822	0.00095438	0.030113	0.024898	0.909091	0.909091	no
KEGG_GLYCOLYSIS_GLUCONEOGENESIS	YES	YES	--	--	--	--	--	--	YES	0.00038827	0.00035354	0.00019186	0.024165	0.014791	0.0024991	0.73913	0.73913	0.782609	ADH1C, ADH5, ALDH2, ALDH3A2, ALDH7A1, ALDH9A1, ALDOA, ALDOB, ALDOC, BPGM, DLD, ENO2, ENO3, G6PC, GAPDH, HK1, PCK2, PDHA1, PFKL, PFKP, PGAM1, PGAM2, PGM1, TPI1	YES	YES	--	--	--	--	--	--	YES	0.00038827	0.0013026	0.00018282	0.027555	0.006481	0.695652	0.695652	no
KEGG_GLUTATHIONE_METABOLISM	--	--	--	--	YES	--	--	--	YES	0.38914	0.00035594	0.00019589	0.78825	0.0087072	0.00072007	0.777778	0.833333	0.5	G6PD, GCLC, GCLM, GGT7, GPX1, GPX2, GPX4, GSR, GSTA3, GSTA5, GSTM1, GSTM2, GSTM3, GSTP1, GSTZ1, LAP3, RRM1, RRM2, RRM2B	--	--	--	--	YES	--	--	--	YES	0.38914	0.00076967	0.00018625	0.0053831	0.0011583	0.888889	0.833333	no
KEGG_PENTOSE_PHOSPHATE_PATHWAY	YES	YES	--	--	--	--	--	--	YES	0.0019463	0.00056001	0.00061025	0.060792	0.016553	0.010889	1	1	0.9	ALDOA, ALDOB, ALDOC, DERA, G6PD, PFKL, PFKP, PGM1, RBKS, RPIA, TALDO1	YES	YES	--	--	--	--	--	--	YES	0.0019463	0.00058962	0.0003927	0.018415	0.01687	1	1	no
REACTOME_GLUCOSE_METABOLISM	YES	YES	--	--	--	--	--	--	YES	0.004271	0.00070709	0.00057559	0.11413	0.016527	0.012317	0.782609	0.652174	0.652174	AGL, ALDOA, ALDOB, ALDOC, ENO2, ENO3, GAPDH, GOT1, PCK2, PFKL, PFKP, PGAM1, PGAM2, PGM1, PHKA1, PHKB, PHKG2, PPP2CA, PRKACA, PRKACB, PYGL, PYGM, SLC25A13, TPI1	YES	YES	--	--	--	--	--	--	YES	0.004271	0.0031634	0.00036563	0.048991	0.018903	0.73913	0.695652	no
KEGG_FRUCTOSE_AND_MANNOSE_METABOLISM	YES	YES	--	--	--	--	--	--	YES	0.010605	0.00074239	0.002401	0.17699	0.014356	0.026604	0.75	0.833333	0.666667	AKR1B10, ALDOA, ALDOB, ALDOC, HK1, MPI, MTMR2, PFKL, PFKP, PHPT1, PMM2, TPI1, TSTA3	YES	YES	--	--	--	--	--	--	YES	0.010605	0.005031	0.00095822	0.067413	0.033635	0.75	0.75	no
PID_HIF1_TFPATHWAY	YES	YES	--	--	--	--	--	--	YES	0.00018997	0.00084331	0.010731	0.036646	0.023961	0.19687	0.625	0.55	0.6	ABCB1, ABCG2, ADM, AKT1, ALDOA, ARNT, BHLHE40, BNIP3, CA9, COPS5, CREB1, CREBBP, CXCL12, CXCR4, EDN1, ENG, EP300, ETS1, FOS, FURIN, GATA2, HIF1A, HK1, HMOX1, HNF4A, ID2, IGFBP1, ITGB2, JUN, MCL1, NDRG1, NOS2, NPM1, PFKL, PGM1, PLIN2, SERPINE1, SMAD3, SMAD4, TERT, VEGFA	YES	YES	--	--	--	--	--	--	YES	0.00018997	0.021521	0.0012311	0.39921	0.077972	0.6	0.55	no
REACTOME_GLUTATHIONE_CONJUGATION	--	--	--	--	YES	--	--	--	YES	0.4753	0.00095093	0.00020222	0.79268	0.037602	0.0099269	0.857143	0.857143	0.571429	CNDP2, GCLC, GCLM, GGT7, GSTA3, GSTA5, GSTM1, GSTP1	--	--	--	--	YES	--	--	--	YES	0.4753	0.0005923	0.00079729	0.032596	0.046725	1	1	no
BIOCARTA_GLYCOLYSIS_PATHWAY	YES	YES	--	--	--	--	--	--	YES	0.0021864	0.0013288	0.0043541	0.19819	0.098839	0.11449	1	1	0.8	ALDOB, GAPDH, HK1, PFKL, PGAM1, TPI1	YES	YES	--	--	--	--	--	--	YES	0.0021864	0.0022326	0.00060692	0.12439	0.12945	1	0.8	no
KEGG_RETINOL_METABOLISM	--	--	--	--	YES	--	--	--	YES	NA	0.0014142	0.007099	NA	0.023851	0.1074	0.826087	0.652174	0.391304	ADH1C, ADH5, ALDH1A1, CYP1A1, CYP1A2, CYP26B1, CYP2A6, CYP2B6, CYP2C18, CYP2C8, CYP2C9, CYP3A5, CYP4A11, CYP4A22, LRAT, UGT1A1, UGT1A10, UGT1A3, UGT1A4, UGT1A6, UGT2B15, UGT2B28, UGT2B7	--	--	--	--	--	--	YES	--	YES	NA	0.00074432	0.061792	0.013784	0.53765	0.782609	0.652174	no
KEGG_PEROXISOME	YES	YES	--	--	--	--	--	--	YES	0.0011507	0.0014376	0.003096	0.037225	0.025215	0.030663	0.764706	0.647059	0.823529	ABCD1, ACAA1, ACOX1, BAAT, CAT, ECH1, EPHX2, HAO2, NOS2, PECR, PEX11A, PRDX1, PXMP2, SCP2, SLC27A2, SOD1, SOD2, XDH	YES	YES	--	--	--	--	--	--	YES	0.0011507	0.00038499	0.0065617	0.0054999	0.1261	0.823529	0.882353	no
REACTOME_MEMBRANE_TRAFFICKING	YES	YES	--	--	--	--	--	--	YES	0.00056818	0.0017578	0.0028642	0.037416	0.031848	0.025528	0.769231	0.730769	0.692308	AP2M1, ARF1, BLOC1S1, CHMP2A, CHMP6, CLTB, CLTC, COPA, COPB1, COPB2, DNM1, GJA1, GJB6, GJC1, HSPA8, IGF2R, PIK3C2A, RPS27A, SAR1B, SH3GL2, SRC, STX4, TJP1, TSG101, VAMP2, VPS28, VPS4A	YES	YES	--	--	--	--	--	--	YES	0.00056818	0.00037195	0.0056088	0.0054583	0.11871	0.692308	0.692308	no
REACTOME_METABOLISM_OF_NUCLEOTIDES	--	--	--	--	YES	--	--	--	YES	0.22567	0.0017634	0.00095932	0.685	0.023749	0.020319	0.625	0.541667	0.5	AGXT2, AMPD1, CAT, CDA, DCK, DCTD, DTYMK, DUT, GART, GLRX, GPX1, GSR, HPRT1, IMPDH2, NME1, NT5C, PAICS, PNP, RRM1, RRM2, RRM2B, TK1, TXNRD1, UPP1, XDH	--	--	--	--	YES	--	--	--	YES	0.22567	0.006006	0.02439	0.1148	0.33515	0.708333	0.666667	no
KEGG_PENTOSE_AND_GLUCURONATE_INTERCONVERSIONS	--	--	--	--	YES	--	--	--	YES	0.41171	0.0032332	0.0042245	0.79184	0.081024	0.050194	1	0.777778	0.666667	GUSB, UGDH, UGT1A1, UGT1A10, UGT1A3, UGT1A4, UGT1A6, UGT2B15, UGT2B28, UGT2B7	--	--	--	--	YES	--	--	--	YES	0.41171	0.00077806	0.01206	0.023319	0.19916	0.777778	0.777778	no
REACTOME_METABOLISM_OF_LIPIDS_AND_LIPOPROTEINS	YES	YES	--	--	--	--	--	--	YES	0.00017328	0.0036358	0.012669	0.060079	0.40677	0.46855	0.582734	0.517986	0.676259	A2M, ABCB11, ABCC3, ABCD1, ABCG1, ACAA1, ACADL, ACADM, ACADVL, ACLY, ACOX1, AGT, ALAS1, APOA1, APOA5, APOC3, APOE, ARF1, ARSA, ASAH1, BAAT, BDH1, CAV1, CCNC, CD36, CDK19, CEPT1, CERK, CGA, CHAT, CHKA, CPT1B, CREBBP, CSNK1G2, CYP11A1, CYP11B1, CYP17A1, CYP19A1, CYP1A1, CYP46A1, CYP4A11, CYP51A1, CYP8B1, DECR1, DEGS1, DHCR7, EBP, ECI1, ELOVL2, ELOVL3, ELOVL5, ELOVL6, EP300, FABP1, FABP4, FASN, FDFT…	--	YES	YES	--	--	--	--	--	YES	0.00017328	0.022568	0.10649	0.58319	0.8656	0.546763	0.510791	no
BIOCARTA_NUCLEARRS_PATHWAY	YES	YES	--	--	--	--	--	--	YES	0.0070066	0.0039201	0.0038649	0.17838	0.049425	0.050471	0.8	0.7	0.8	ABCB1, ABCB11, ABCC3, CYP1A2, CYP2E1, NR1H3, NR1H4, NR1I3, PPARA, PPARD, PPARG	YES	YES	--	--	--	--	--	--	YES	0.0070066	0.00078616	0.00019635	0.030808	0.0010083	0.7	0.8	no
KEGG_TRYPTOPHAN_METABOLISM	YES	YES	--	--	--	--	--	--	YES	0.025666	0.0049831	0.00058766	0.29085	0.074573	0.011606	0.666667	0.611111	0.611111	AADAT, ACAT2, ACMSD, ALDH2, ALDH3A2, ALDH7A1, ALDH9A1, CAT, CYP1A1, CYP1A2, CYP1B1, HAAO, HADH, HADHA, IL4I1, INMT, MAOA, MAOB, WARS	YES	YES	--	--	--	--	--	--	YES	0.025666	0.005965	0.0061464	0.11462	0.12046	0.611111	0.666667	no
REACTOME_RECYCLING_OF_BILE_ACIDS_AND_SALTS	--	--	--	--	YES	--	--	--	YES	0.4054	0.0052931	0.0043496	0.75366	0.19653	0.14366	0.5	0.25	0.75	ABCB11, ABCC3, BAAT, SLC10A2	--	--	--	--	--	--	--	--	--	0.4054	0.10308	0.14956	0.59527	0.70937	0.5	0.75	no
KEGG_ARACHIDONIC_ACID_METABOLISM	--	--	--	--	YES	--	--	--	YES	0.95044	0.005339	0.023898	0.97545	0.073301	0.21746	0.555556	0.5	0.5	CBR1, CBR3, CYP2B6, CYP2C18, CYP2C8, CYP2C9, CYP2E1, CYP4A11, CYP4A22, EPHX2, GGT7, GPX1, GPX2, GPX4, PLA2G12A, PLA2G2D, PLA2G4A, PTGS1, PTGS2	--	--	--	--	--	--	YES	--	YES	0.95044	0.0038484	0.29968	0.070975	0.92038	0.722222	0.555556	no
KEGG_DRUG_METABOLISM_OTHER_ENZYMES	--	--	--	--	YES	--	--	--	YES	0.53686	0.0070194	0.0087685	0.84258	0.08143	0.097092	0.842105	0.684211	0.578947	CDA, CES1, CES2, CYP2A6, CYP3A5, GUSB, HPRT1, IMPDH2T1, TK1, UGT1A1, UGT1A10, UGT1A3, UGT1A4, UGT1A6, UGT2B15, UGT2B28, UGT2B7, UPP1, XDH	--	--	--	--	YES	--	--	--	YES	0.53686	0.0031895	0.016227	0.057123	0.24553	0.684211	0.684211	no
REACTOME_MITOCHONDRIAL_PROTEIN_IMPORT	--	--	--	--	YES	--	--	--	YES	0.14952	0.0073741	0.0013723	0.58379	0.095926	0.016464	0.714286	0.785714	0.642857	ACO2, ATP5A1, ATP5B, CS, HSPD1, IDH3G, MTX2, SLC25A13, SLC25A4, TIMM17A, TIMM17B, TIMM22, TIMM9, TOMM70A, VDAC1	--	--	--	--	--	--	--	--	--	0.14952	0.051024	0.0847	0.42142	0.57018	0.714286	0.714286	no
KEGG_FATTY_ACID_METABOLISM	YES	YES	--	--	--	--	--	--	YES	0.0011507	0.0084456	0.00077399	0.035609	0.096199	0.0067112	0.823529	0.588235	0.705882	ACAA1, ACADL, ACADM, ACADVL, ACAT2, ACOX1, ADH1C, ADH5, ALDH2, ALDH3A2, ALDH7A1, ALDH9A1, CPT1B, CYP4A11, CYP4A22, ECI1, HADH, HADHA	YES	YES	--	--	--	--	--	--	YES	0.0011507	0.0021174	0.016498	0.057214	0.23424	0.764706	0.588235	no
KEGG_PORPHYRIN_AND_CHLOROPHYLL_METABOLISM	--	--	--	--	YES	--	--	--	YES	0.89371	0.0086302	0.040404	0.96782	0.10071	0.30516	0.8	0.666667	0.466667	ALAS1, ALAS2, BLVRA, EPRS, GUSB, HMBS, HMOX1, PPOX, UGT1A1, UGT1A10, UGT1A3, UGT1A4, UGT1A6, UGT2B15, UGT2B28, UGT2B7	--	--	--	--	--	--	YES	--	YES	0.89371	0.0086075	0.20922	0.11273	0.87338	0.733333	0.533333	no
KEGG_ASCORBATE_AND_ALDARATE_METABOLISM	--	--	--	--	YES	--	--	--	YES	0.070189	0.0092799	0.00020008	0.40331	0.11645	0.0061841	0.916667	0.833333	0.75	ALDH2, ALDH3A2, ALDH7A1, ALDH9A1, UGDH, UGT1A1, UGT1A10, UGT1A3, UGT1A4, UGT1A6, UGT2B15, UGT2B28, UGT2B7	--	--	--	--	YES	--	--	--	YES	0.070189	0.0005805	0.010157	0.012528	0.16461	0.833333	0.833333	no
KEGG_PPAR_SIGNALING_PATHWAY	YES	YES	--	--	--	--	--	--	YES	0.00018918	0.0096236	0.0092488	0.0065904	0.19344	0.14582	0.666667	0.666667	0.733333	ACAA1, ACADL, ACADM, ACOX1, ADIPOQ, APOA1, APOA5, APOC3, CD36, CPT1B, CYP4A11, CYP4A22, CYP8B1, FABP1, FABP2, FABP4, FABP5, FABP7, HMGCS2, ILK, LPL, ME1, MMP1, NR1H3, PCK2, PPARA, PPARD, PPARG, SCP2, SLC27A1, SLC27A2	YES	YES	--	--	--	--	--	--	YES	0.00018918	0.0047385	0.0038546	0.092356	0.11901	0.7	0.633333	no
REACTOME_CYTOCHROME_P450_ARRANGED_BY_SUBSTRATE_TYPE	--	--	--	--	--	--	YES	--	YES	NA	0.0097105	0.23487	NA	0.1405	0.82737	0.55	0.55	0.3	CYP11A1, CYP11B1, CYP17A1, CYP19A1, CYP1A1, CYP1A2, CYP1B1, CYP26B1, CYP2A6, CYP2B6, CYP2C18, CYP2C8, CYP2C9, CYP2E1, CYP2F1, CYP2W1, CYP3A5, CYP46A1, CYP4A11, CYP51A1, CYP8B1	--	--	--	--	--	--	YES	--	YES	NA	0.016975	0.30085	0.3044	0.91595	0.65	0.55	no
REACTOME_XENOBIOTICS	--	--	--	--	--	--	YES	--	YES	NA	0.011031	0.44579	NA	0.16746	0.96622	0.666667	0.555556	0.111111	CYP1A1, CYP1A2, CYP2A6, CYP2B6, CYP2C18, CYP2C8, CYP2C9, CYP2E1, CYP2F1, CYP3A5	--	--	--	--	--	--	YES	--	YES	NA	0.016145	0.31356	0.21504	0.91845	0.888889	0.666667	no
REACTOME_PPARA_ACTIVATES_GENE_EXPRESSION	YES	YES	--	--	--	--	--	--	YES	0.00056915	0.012549	0.025675	0.048896	0.21585	0.31662	0.757576	0.666667	0.757576	ACADM, ACOX1, AGT, ALAS1, APOA1, APOA5, CCNC, CD36, CDK19, CREBBP, CYP1A1, CYP4A11, EP300, FABP1, FDFT1, FHL2, G0S2, HMGCR, HMGCS1, HMGCS2, ME1, NCOA3, PEX11A, PLIN2, PPARA, PPARG, PPARGC1A, SLC27A1, SULT2A1, TEAD1, TNFRSF21, TRIB3, TXNRD1, YAP1	YES	YES	--	--	--	--	--	--	YES	0.00056915	0.015171	0.017004	0.30406	0.30651	0.69697	0.636364	no
KEGG_GALACTOSE_METABOLISM	--	--	--	--	--	--	YES	--	YES	0.12893	0.014644	0.25629	0.54028	0.19299	0.82335	0.555556	0.666667	0.444444	B4GALT1, B4GALT2, G6PC, GAA, GALE, GLB1, HK1, PFKL, PFKP, PGM1	--	--	--	--	--	--	--	--	--	0.12893	0.11418	0.059911	0.58811	0.46011	0.666667	0.555556	no
REACTOME_GLUCONEOGENESIS	YES	YES	--	--	--	--	--	--	YES	0.011534	0.015	0.0018029	0.19232	0.16497	0.016256	0.692308	0.692308	0.692308	ALDOA, ALDOB, ALDOC, ENO2, ENO3, GAPDH, GOT1, PCK2, PGAM1, PGAM2, PRKACA, PRKACB, SLC25A13, TPI1	YES	YES	--	--	--	--	--	--	YES	0.011534	0.0096934	0.015015	0.097424	0.19941	0.692308	0.692308	no
REACTOME_ETHANOL_OXIDATION	--	--	--	--	YES	--	--	--	YES	0.50899	0.015115	0.015366	0.79218	0.52287	0.43269	1	1	0.5	ADH1C, ALDH1A1, ALDH2	--	--	--	--	--	--	YES	--	YES	0.50899	0.017234	0.05855	0.54315	0.61132	1	1	no
REACTOME_CHOLESTEROL_BIOSYNTHESIS	--	--	--	--	YES	--	--	--	YES	0.45358	0.015255	0.0033844	0.79222	0.19658	0.038739	0.818182	0.818182	0.727273	CYP51A1, DHCR7, EBP, FDFT1, HMGCR, HMGCS1, IDI1, LBR, LSS, MVD, NSDHL, SQLE	--	--	--	--	--	--	--	--	--	0.45358	0.72891	0.98168	0.99572	1	0.636364	0.545455	no
REACTOME_TCA_CYCLE_AND_RESPIRATORY_ELECTRON_TRANSPORT	--	--	--	--	YES	--	--	--	YES	0.076428	0.01581	0.00018875	0.5146	0.26975	0.00057605	0.633333	0.733333	0.466667	ACO2, ATP5A1, ATP5B, ATP5E, ATP5O, BSG, COX6B1, CS, CYCS, CYTB, DLD, ETFB, IDH3A, IDH3G, NDUFA1, NDUFA5, NDUFA9, NDUFB10, NDUFB5, NDUFB6, NDUFS2, NDUFS7, NDUFV1, NDUFV2, NDUFV3, PDHA1, PDHX, SDHA, SDHB, SLC16A3, UQCRFS1	--	--	--	--	YES	--	--	--	YES	0.076428	0.0087479	0.017438	0.1606	0.32804	0.7	0.633333	no
REACTOME_FATTY_ACID_TRIACYLGLYCEROL_AND_KETONE_BODY_METABOLISM	YES	YES	--	--	--	--	--	--	YES	0.00018365	0.016184	0.012767	0.0036672	0.32662	0.28717	0.709091	0.6	0.745455	ACADL, ACADM, ACADVL, ACLY, ACOX1, AGT, ALAS1, APOA1, APOA5, BDH1, CCNC, CD36, CDK19, CPT1B, CREBBP, CYP1A1, CYP4A11, DECR1, ECI1, ELOVL2, ELOVL3, ELOVL5, ELOVL6, EP300, FABP1, FASN, FDFT1, FHL2, G0S2, HADH, HADHA, HMGCR, HMGCS1, HMGCS2, HSD17B12, LPIN1, ME1, NCOA3, NCOR2, OXCT1, PCCB, PEX11A, PLIN2, PPARA, PPARG, PPARGC1A, PRKAA2, PRKAB2, PRKAG2, SLC27A1, SULT2A1, TEAD1, TNFRSF21, TRIB3, TXNRD1,…	--	YES	YES	--	--	--	--	--	YES	0.00018365	0.026283	0.059997	0.50547	0.63259	0.6	0.618182	no
KEGG_AMINO_SUGAR_AND_NUCLEOTIDE_SUGAR_METABOLISM	--	--	--	--	--	--	YES	--	YES	0.38064	0.016541	0.11009	0.78343	0.1882	0.58908	0.636364	0.636364	0.545455	AMDHD2, GALE, GFPT1, GNPDA1, HEXA, HEXB, HK1, MPI, PGM1, PMM2, TSTA3, UGDH	--	--	--	--	--	--	--	--	--	0.38064	0.089307	0.080931	0.53638	0.54309	0.636364	0.545455	no
KEGG_STARCH_AND_SUCROSE_METABOLISM	--	--	--	--	YES	--	--	--	YES	0.43864	0.017623	0.02841	0.79101	0.21568	0.27992	0.7	0.5	0.5	AGL, AMY2A, AMY2B, ENPP1, ENPP3, G6PC, GAA, GUSB, HK1, PGM1, PYGL, PYGM, UGDH, UGT1A1, UGT1A10, UGT1A3, UGT1A4, UGT1A6, UGT2B15, UGT2B28, UGT2B7	--	--	--	--	--	--	YES	--	YES	0.43864	0.013542	0.058987	0.25264	0.50395	0.55	0.5	no
REACTOME_PYRUVATE_METABOLISM_AND_CITRIC_ACID_TCA_CYCLE	YES	YES	--	--	--	--	--	--	YES	0.037369	0.018107	0.038446	0.33424	0.1923	0.2804	0.8	0.9	0.5	ACO2, BSG, CS, DLD, IDH3A, IDH3G, PDHA1, PDHX, SDHA, SDHB, SLC16A3	YES	YES	--	--	--	--	--	--	YES	0.037369	0.012775	0.0068722	0.21919	0.14815	0.9	0.6	no
BIOCARTA_ARAP_PATHWAY	--	--	--	--	--	--	YES	--	YES	NA	0.018413	0.17935	NA	0.26584	0.6789	0.8	0.4	0.8	ARF1, CLTB, COPA, CYTH1, CYTH2, KDELR2	--	--	--	--	--	--	--	--	--	NA	0.086462	0.14809	0.53518	0.697	0.8	0.8	no
KEGG_PYRUVATE_METABOLISM	YES	YES	--	--	--	--	--	--	YES	0.025114	0.019399	0.0020117	0.25129	0.22417	0.034615	0.777778	0.777778	0.555556	ACAT2, ALDH2, ALDH3A2, ALDH7A1, ALDH9A1, DLD, ME1, ME2, PCK2, PDHA1	YES	YES	--	--	--	--	--	--	YES	0.025114	0.0097257	0.020813	0.14718	0.27433	0.888889	0.777778	no
REACTOME_ABC_FAMILY_PROTEINS_MEDIATED_TRANSPORT	--	--	--	--	--	--	YES	--	YES	0.065006	0.022587	0.059601	0.38572	0.21638	0.37681	0.8	0.7	0.8	ABCB1, ABCB6, ABCC1, ABCC2, ABCC3, ABCC4, ABCC5, ABCC9, ABCD1, ABCG1, APOA1	--	--	--	--	--	--	--	YES	YES	0.065006	0.11144	0.012174	0.58033	0.21581	0.8	0.9	no
BIOCARTA_FEEDER_PATHWAY	--	--	--	--	YES	--	--	--	YES	0.38541	0.022589	0.023844	0.75488	0.29224	0.22988	0.8	0.4	0.6	HK1, MPI, PGM1, PYGL, PYGM, TPI1	--	--	--	--	YES	--	--	--	YES	0.38541	0.03085	0.033381	0.39531	0.38445	0.8	0.6	no
REACTOME_SULFUR_AMINO_ACID_METABOLISM	--	--	--	--	YES	--	--	--	YES	0.34621	0.022637	0.0002006	0.75463	0.21803	0.012005	0.75	0.75	0.625	ADI1, CNDP2, CTH, GCLC, GCLM, GOT1, MAT1A, MAT2A, SQRDL	--	--	--	--	--	--	--	YES	YES	0.34621	0.060642	0.00079208	0.41839	0.020032	0.75	0.625	no
REACTOME_GLUCURONIDATION	--	--	--	--	YES	--	--	--	YES	0.35043	0.024637	0.019495	0.74583	0.26862	0.20032	1	0.833333	0.833333	UGDH, UGT1A1, UGT1A3, UGT1A4, UGT1A6, UGT2B28, UGT2B7	--	--	--	--	YES	--	--	--	YES	0.35043	0.004038	0.032264	0.12819	0.35708	0.833333	0.833333	no
REACTOME_PEROXISOMAL_LIPID_METABOLISM	YES	YES	--	--	--	--	--	--	YES	0.0023479	0.024897	0.034176	0.19393	0.34717	0.30973	1	0.75	1	ABCD1, ACAA1, ACOX1, SCP2, SLC27A2	YES	YES	--	--	--	--	--	--	YES	0.0023479	0.01208	0.0024155	0.28661	0.21806	1	1	no
KEGG_TYROSINE_METABOLISM	--	--	--	--	YES	--	--	--	YES	0.62148	0.025427	0.010204	0.88937	0.23355	0.10114	0.833333	0.583333	0.583333	ADH1C, ADH5, COMT, DBH, FAH, GOT1, GSTZ1, IL4I1, MAOA, MAOB, MIF, TH, TYRP1	--	--	--	--	YES	--	--	--	YES	0.62148	0.026122	0.0011499	0.2921	0.04241	0.583333	0.666667	no
REACTOME_SYNTHESIS_AND_INTERCONVERSION_OF_NUCLEOTIDE_DI_AND_TRIPHOSPHATES	--	--	--	--	YES	--	--	--	YES	NA	0.028718	0.00060667	NA	0.30446	0.035997	0.571429	0.714286	0.428571	DTYMK, GLRX, GSR, NME1, RRM1, RRM2, RRM2B, TXNRD1	--	--	--	--	--	--	--	--	--	NA	0.41639	0.083915	0.92235	0.54393	0.714286	0.571429	no
REACTOME_STEROID_HORMONES	--	--	--	--	--	--	YES	--	YES	0.084858	0.029681	0.066314	0.43537	0.2743	0.40311	0.4	0.6	0.6	CGA, CYP11A1, CYP11B1, CYP17A1, CYP19A1, HSD3B1, HSD3B2, LGMN, LHB, SRD5A1, STAR	--	--	--	--	YES	--	--	--	YES	0.084858	0.025943	0.009621	0.33207	0.19541	0.4	0.4	no
REACTOME_PURINE_METABOLISM	--	--	--	--	--	--	YES	--	YES	0.21487	0.030801	0.1369	0.62821	0.27384	0.63747	0.7	0.6	0.5	AMPD1, CAT, DCK, GART, GPX1, HPRT1, IMPDH2, NT5C, PAICS, PNP, XDH	--	--	--	--	--	--	YES	--	YES	0.21487	0.027909	0.17377	0.3326	0.79785	0.7	0.7	no
KEGG_N_GLYCAN_BIOSYNTHESIS	--	--	--	--	--	--	YES	--	YES	0.23467	0.035523	0.29017	0.63113	0.32435	0.83853	0.666667	0.833333	0.333333	B4GALT1, B4GALT2, DPM1, DPM2, RPN1, RPN2, ST6GAL1	--	--	--	--	--	--	--	--	--	0.23467	0.54432	0.19279	0.97168	0.80599	0.833333	0.666667	no
KEGG_ABC_TRANSPORTERS	--	--	--	--	YES	--	--	--	YES	0.1715	0.036574	0.035039	0.59877	0.32401	0.2802	0.636364	0.636364	0.818182	ABCB1, ABCB11, ABCB6, ABCC1, ABCC2, ABCC3, ABCC4, ABCC5, ABCC9, ABCD1, ABCG1, ABCG2	--	--	--	--	--	--	--	YES	YES	0.1715	0.068119	0.030731	0.50685	0.33143	0.636364	0.727273	no
REACTOME_ABCA_TRANSPORTERS_IN_LIPID_HOMEOSTASIS	--	--	--	--	--	--	YES	--	YES	0.20123	0.037485	0.45769	0.62567	0.58541	0.92271	1	0.5	1	ABCD1, ABCG1, APOA1	--	--	--	--	--	--	--	YES	YES	0.20123	0.13869	0.047244	0.62114	0.60031	1	1	no
REACTOME_PYRUVATE_METABOLISM	--	--	--	--	--	--	YES	--	YES	0.058306	0.03764	0.10294	0.40252	0.41739	0.55831	1	1	0.5	BSG, DLD, PDHA1, PDHX, SLC16A3	--	--	--	--	--	--	--	--	--	0.058306	0.098047	0.19243	0.58301	0.80418	1	0.5	no
KEGG_AMYOTROPHIC_LATERAL_SCLEROSIS_ALS	--	--	--	--	--	--	YES	--	YES	0.35398	0.038847	0.097002	0.76777	0.42017	0.63682	0.576923	0.538462	0.461538	BAD, BAX, BCL2L1, BID, CASP1, CASP3, CAT, CYCS, DAXX, GPX1, GRIA2, GRIN1, GRIN2A, GRIN2B, GRIN2C, GRIN2D, MAPK13, MAPK14, NEFH, NEFL, NEFM, NOS1, RAC1, SLC1A2, SOD1, TNF, TP53	--	--	--	--	--	--	--	--	--	0.35398	0.090571	0.21151	0.58221	0.89911	0.5	0.538462	no
REACTOME_LIPOPROTEIN_METABOLISM	--	YES	YES	--	--	--	--	--	YES	0.002499	0.03963	0.52564	0.061864	0.32894	0.97264	0.769231	0.769231	0.846154	A2M, ABCG1, APOA1, APOA5, APOC3, APOE, LCAT, LDLR, LIPC, LPL, P4HB, SAR1B, SCARB1, SDC1	--	--	--	--	--	YES	--	--	YES	0.002499	0.13234	0.057245	0.59894	0.47582	0.692308	0.538462	no
REACTOME_BILE_SALT_AND_ORGANIC_ANION_SLC_TRANSPORTERS	--	--	--	--	--	--	YES	--	YES	0.43111	0.039702	0.22454	0.76781	0.58242	0.78188	0.5	1	1	SLC16A3, SLC16A7, SLC47A1	--	--	--	--	--	--	--	--	--	0.43111	0.19262	0.31092	0.70399	0.91365	0.5	0.5	no
KEGG_HUNTINGTONS_DISEASE	--	--	--	--	YES	--	--	--	YES	0.067081	0.044587	0.0064424	0.54115	0.58252	0.20253	0.533333	0.633333	0.516667	AP2M1, ATP5A1, ATP5B, ATP5E, ATP5O, BAX, BBC3, BDNF, CASP3, CASP8, CLTB, CLTC, COX6A2, COX6B1, COX7A1, CREB1, CREB3L3, CREBBP, CYCS, CYTB, DCTN1, EP300, GNAQ, GPX1, GRIN1, GRIN2B, HDAC1, HDAC2, ITPR1, NDUFA1, NDUFA5, NDUFA9, NDUFB10, NDUFB5, NDUFB6, NDUFS2, NDUFS7, NDUFV1, NDUFV2, NDUFV3, PLCB3, POLR2C, POLR2D, POLR2I, POLR2K, PPARG, PPARGC1A, PPID, SDHA, SDHB, SLC25A31, SLC25A4, SOD1, SOD2, TBP,…	--	--	--	--	--	--	YES	--	YES	0.067081	0.017635	0.16958	0.49234	0.87972	0.583333	0.583333	no
KEGG_ONE_CARBON_POOL_BY_FOLATE	--	--	--	--	--	--	YES	--	YES	NA	0.045873	0.13877	NA	0.44889	0.63058	1	0.5	0.5	DHFR, GART, MTHFD1L, MTHFD2, MTHFS	--	--	--	--	--	--	--	--	--	NA	0.5299	0.13768	0.95764	0.67094	0.75	1	no
KEGG_STEROID_BIOSYNTHESIS	--	--	--	--	YES	--	--	--	YES	0.36025	0.049236	0.04654	0.75228	0.37297	0.31976	0.75	0.75	0.625	CEL, CYP51A1, DHCR7, EBP, FDFT1, LIPA, LSS, NSDHL, SQLE	--	--	--	--	--	--	--	--	--	0.36025	0.76258	0.84653	0.99243	1	0.625	0.5	no
REACTOME_ACTIVATION_OF_THE_AP1_FAMILY_OF_TRANSCRIPTION_FACTORS	--	YES	YES	--	--	--	--	--	YES	0.01592	0.049847	0.26082	0.25009	0.43025	0.79925	0.833333	0.666667	0.833333	FOS, JUN, MAPK1, MAPK10, MAPK14, MAPK3, MAPK9	YES	YES	--	--	--	--	--	--	YES	0.01592	0.041591	0.021971	0.42462	0.33113	0.666667	1	no
REACTOME_ANDROGEN_BIOSYNTHESIS	--	--	--	--	--	--	YES	--	YES	0.082687	0.049924	0.077545	0.45048	0.42246	0.43025	0.6	0.8	0.6	CGA, CYP17A1, HSD3B1, HSD3B2, LHB, SRD5A1	--	--	--	--	--	--	--	YES	YES	0.082687	0.06576	0.0056646	0.50967	0.2179	0.6	0.4	no
KEGG_HISTIDINE_METABOLISM	--	YES	--	YES	--	--	--	--	YES	0.049197	0.05097	0.00364	0.36926	0.42719	0.063915	0.714286	0.714286	0.857143	ALDH2, ALDH3A2, ALDH7A1, ALDH9A1, AMDHD1, HDC, MAOA, MAOB	--	YES	YES	--	--	--	--	--	YES	0.049197	0.038894	0.059597	0.39844	0.44892	0.714286	0.714286	no
KEGG_LYSOSOME	--	--	--	--	--	YES	--	--	YES	0.028977	0.051503	0.52072	0.3355	0.47843	0.97831	0.653846	0.461538	0.653846	AP3M1, ARSA, ASAH1, ATP6AP1, ATP6V0B, ATP6V0D1, CD68, CLTB, CLTC, CTSD, CTSS, GAA, GLB1, GUSB, HEXA, HEXB, IGF2R, LAMP1, LAPTM5, LGMN, LIPA, MAN2B1, MCOLN1, NPC1, PLA2G15, SLC11A2, SUMF1	--	--	--	--	--	YES	--	--	YES	0.028977	0.090571	0.14782	0.58021	0.80773	0.615385	0.615385	no
KEGG_ENDOCYTOSIS	--	--	--	--	--	YES	--	--	YES	0.03045	0.052285	0.25218	0.40877	0.58092	0.85314	0.510638	0.531915	0.595745	ACAP1, ADRB2, AP2M1, CBLB, CCR5, CHMP2A, CHMP6, CLTB, CLTC, CSF1R, CXCR2, CXCR4, DNM1, DNM1L, EGF, EGFR, EPN2, ERBB3, F2R, FGFR2, FGFR4, HRAS, HSPA1A, HSPA1B, HSPA1L, HSPA2, HSPA8, IGF1R, IL2RG, KDR, KIT, LDLR, MDM2, MET, NTRK1, PIP4K2B, RAB11A, RAB11FIP2, RAB31, RAB4A, RET, SH3GL2, SRC, STAMBP, TRAF6, TSG101, VPS28, VPS4A	--	--	--	--	--	YES	--	--	YES	0.03045	0.060298	0.15612	0.58168	0.87872	0.510638	0.574468	no
REACTOME_CHYLOMICRON_MEDIATED_LIPID_TRANSPORT	--	--	--	--	--	YES	--	--	YES	0.013842	0.053633	0.40797	0.19531	0.41335	0.95079	0.888889	0.888889	0.888889	APOA1, APOA5, APOC3, APOE, LDLR, LIPC, LPL, P4HB, SAR1B, SDC1	--	--	--	--	--	YES	--	--	YES	0.013842	0.12624	0.10251	0.57336	0.57805	0.777778	0.666667	no
REACTOME_FORMATION_OF_ATP_BY_CHEMIOSMOTIC_COUPLING	--	YES	--	YES	--	--	--	--	YES	0.041812	0.055146	0.038961	0.4251	0.55025	0.37543	1	1	1	ATP5A1, ATP5B, ATP5E, ATP5O	--	--	--	--	--	YES	--	--	YES	0.041812	0.068103	0.083761	0.55484	0.58524	1	1	no
PID_CDC42_PATHWAY	--	--	--	--	--	YES	--	--	YES	0.013234	0.055346	0.090944	0.20925	0.41942	0.56776	0.764706	0.588235	0.764706	ARPC3, CDH1, CTNNB1, GSK3B, HRAS, IQGAP1, JUN, MAPK1, MAPK14, MAPK3, MAPK9, MYL2, PAK1, PAK4, PIK3CA, RAC1, SRC, TIAM1	YES	YES	--	--	--	--	--	--	YES	0.013234	0.025987	0.049681	0.32649	0.46895	0.647059	0.764706	no
BIOCARTA_PPARA_PATHWAY	--	YES	--	YES	--	--	--	--	YES	0.0039977	0.056187	0.035622	0.15607	0.55528	0.37355	0.540541	0.486486	0.540541	ACOX1, APOA1, CD36, CPT1B, CREBBP, DUT, EP300, FABP1, FAT1, HSP90AA1, HSPA1A, INS, JUN, LPL, MAPK1, MAPK3, ME1, MYC, NCOR2, NFKBIA, NOS2, NR1H3, NR2F1, NRIP1, PDGFA, PIK3CA, PIK3CG, PPARA, PPARGC1A, PRKACB, PRKAR2B, PRKCA, PTGS2, RB1, RELA, STAT5A, STAT5B, TNF	YES	YES	--	--	--	--	--	--	YES	0.0039977	0.016679	0.017272	0.37351	0.33477	0.513514	0.540541	no
REACTOME_LYSOSOME_VESICLE_BIOGENESIS	--	YES	--	YES	--	--	--	--	YES	0.046313	0.056188	0.0070496	0.37776	0.43539	0.14185	1	1	1	ARF1, BLOC1S1, CLTC, HSPA8, SH3GL2, VAMP2	YES	YES	--	--	--	--	--	--	YES	0.046313	0.042216	0.029941	0.42122	0.38698	1	1	no
REACTOME_ALPHA_LINOLENIC_ACID_ALA_METABOLISM	--	--	--	--	--	YES	--	--	YES	0.046512	0.056378	0.32158	0.37376	0.43211	0.8303	0.8	0.6	0.6	ABCD1, ACAA1, ACOX1, ELOVL2, ELOVL5, SCP2	--	--	--	--	--	YES	--	--	YES	0.046512	0.068399	0.095691	0.50886	0.58031	0.6	0.8	no
PID_RET_PATHWAY	--	--	--	--	--	YES	--	--	YES	0.01456	0.06629	0.39678	0.22799	0.55409	0.95642	0.565217	0.565217	0.73913	CREB1, CRK, FRS2, GDNF, GRB10, GRB2, GRB7, HRAS, IRS1, JUN, MAPK1, MAPK3, NCK1, PIK3CA, PRKACA, PRKCA, PTK2, PXN, RAC1, RASA1, RET, RHOA, SHC1, SRC	--	--	--	--	--	YES	--	--	YES	0.01456	0.12895	0.072395	0.61425	0.56649	0.608696	0.695652	no
BIOCARTA_MAL_PATHWAY	--	--	--	--	--	--	--	--	--	0.16942	0.075821	0.13688	0.58848	0.53237	0.62938	1	0.666667	0.833333	ACTA1, HNF1A, HRAS, MAPK1, MAPK3, RAC1, RHOA	--	--	--	--	--	--	--	YES	YES	0.16942	0.14092	0.024941	0.58169	0.33385	0.833333	0.833333	no
KEGG_BUTANOATE_METABOLISM	--	--	--	--	--	--	--	YES	YES	0.074759	0.076619	0.019212	0.43209	0.53948	0.16441	0.714286	0.571429	0.5	ACAT2, ACSM5, AKR1B10, ALDH2, ALDH3A2, ALDH7A1, ALDH9A1, BDH1, GAD1, HADH, HADHA, HMGCS1, HMGCS2, OXCT1, PDHA1	--	--	--	--	--	--	--	--	--	0.074759	0.063587	0.10111	0.51007	0.61712	0.642857	0.571429	no
BIOCARTA_PTDINS_PATHWAY	--	YES	--	YES	--	--	--	--	YES	0.013601	0.078294	0.044595	0.19452	0.5433	0.32059	0.818182	0.818182	0.818182	AKT1, AP2M1, ARF1, ARHGEF2, BAD, BTK, GSK3B, LYN, PFKL, PFKP, PLCG1, RAC1	YES	YES	--	--	--	--	--	--	YES	0.013601	0.00019802	0.0087803	0.0054134	0.13469	0.909091	0.727273	no
REACTOME_GAP_JUNCTION_TRAFFICKING	--	--	--	--	--	--	--	YES	YES	0.23565	0.080405	0.045762	0.62785	0.55305	0.32113	0.833333	0.833333	0.5	AP2M1, CLTB, CLTC, DNM1, GJA1, GJB6, GJC1	--	--	--	--	--	--	--	--	--	0.23565	0.063396	0.42478	0.50737	0.93431	0.666667	0.5	no
REACTOME_MITOCHONDRIAL_FATTY_ACID_BETA_OXIDATION	--	--	--	--	--	YES	--	--	YES	0.049799	0.08121	0.48109	0.36777	0.54057	0.97682	0.857143	0.571429	0.857143	ACADL, ACADM, ACADVL, DECR1, ECI1, HADH, HADHA, PCCB	--	--	--	--	--	YES	--	--	YES	0.049799	0.73702	0.98605	0.99256	1	0.571429	0.428571	no
BIOCARTA_CCR3_PATHWAY	--	--	--	--	--	--	--	--	--	0.20856	0.081235	0.24726	0.62926	0.55053	0.82605	0.909091	0.545455	0.545455	CCL11, GNAQ, GNAS, GNB1, GNGT1, HRAS, MAPK1, MAPK3, MYL2, PRKCA, PTK2, RHOA	--	--	--	--	--	--	--	YES	YES	0.20856	0.1305	0.025959	0.58373	0.29572	0.727273	0.818182	no
KEGG_OXIDATIVE_PHOSPHORYLATION	--	--	--	--	--	--	--	YES	YES	0.094432	0.081511	0.0017331	0.53177	0.58156	0.01876	0.607143	0.714286	0.535714	ATP5A1, ATP5B, ATP5E, ATP5O, ATP6AP1, ATP6V0B, ATP6V0D1, ATP6V1C1, ATP6V1D, ATP6V1F, ATP6V1G2, COX6A2, COX6B1, COX7A1, CYTB, NDUFA1, NDUFA5, NDUFA9, NDUFB10, NDUFB5, NDUFB6, NDUFS2, NDUFS7, NDUFV1, NDUFV2, NDUFV3, SDHA, SDHB, UQCRFS1	--	--	--	--	--	--	YES	--	YES	0.094432	0.023243	0.054762	0.39002	0.54165	0.607143	0.642857	no
PID_IFNG_PATHWAY	--	--	--	--	--	--	--	--	--	0.10156	0.090451	0.13018	0.52445	0.57787	0.67386	0.8	0.55	0.8	AKT1, CAMK2B, CAMK2G, CASP1, CEBPB, CREBBP, CRKL, DAPK1, EP300, IFNG, IFNGR1, IL1B, JAK1, JAK2, MAPK1, MAPK3, PIK3CA, PRKCD, SOCS1, STAT1, STAT3	--	--	--	--	--	--	YES	--	YES	0.10156	0.0074385	0.076368	0.14526	0.57564	0.85	0.75	no
REACTOME_BILE_ACID_AND_BILE_SALT_METABOLISM	--	--	--	--	--	--	--	--	--	0.076908	0.09186	0.2542	0.41927	0.56162	0.81787	0.571429	0.428571	0.714286	ABCB11, ABCC3, BAAT, CYP46A1, CYP8B1, SCP2, SLC10A2, SLC27A2	--	--	--	--	YES	--	--	--	YES	0.076908	0.033169	0.026909	0.38389	0.33812	0.714286	0.857143	no
REACTOME_METABOLISM_OF_AMINO_ACIDS_AND_DERIVATIVES	--	--	--	--	--	--	--	YES	YES	0.41028	0.094787	0.0074668	0.79394	0.74721	0.22908	0.522388	0.477612	0.477612	AADAT, ACMSD, ADI1, AGMAT, AGXT2, ALDH6A1, ALDH7A1, ALDH9A1, AMDHD1, ASS1, BCAT1, BCAT2, CGA, CKM, CKMT2, CNDP2, CPS1, CTH, DBH, DIO1, DLD, FAH, FSHB, GCLC, GCLM, GLUL, GOT1, GSTZ1, HAAO, HDC, HSD17B10, INHA, INHBA, IYD, LHB, MAT1A, MAT2A, NQO1, OAZ1, PCBD1, PCSK1, PHGDH, PSMA2, PSMB10, PSMB4, PSMB8, PSMB9, PSMC1, PSMC4, PSMD10, PSMD12, PSMD14, PSMD2, PSMD4, PSMD6, PSMD8, PSMD9, PSME1, PSME2, PSM…	--	--	--	--	--	--	--	--	--	0.41028	0.081086	0.079266	0.61721	0.70283	0.492537	0.492537	no
ST_TUMOR_NECROSIS_FACTOR_PATHWAY	--	--	--	--	--	--	--	--	--	0.054143	0.096223	0.40835	0.38314	0.58213	0.94699	0.642857	0.571429	0.642857	BIRC2, BIRC3, CASP3, CASP8, CFLAR, IKBKG, JUN, NFKB1, NFKB2, NFKBIA, NFKBIB, NFKBIE, RIPK1, TNF, TNFAIP3	--	--	--	--	--	--	--	YES	YES	0.054143	0.056243	0.038344	0.46451	0.36475	0.785714	0.642857	no
KEGG_CITRATE_CYCLE_TCA_CYCLE	--	--	--	--	--	--	--	--	--	0.10164	0.096805	0.16797	0.47187	0.5751	0.68085	0.666667	0.777778	0.555556	ACLY, ACO2, CS, DLD, IDH3A, IDH3G, PCK2, PDHA1, SDHA, SDHB	--	--	--	--	--	--	--	YES	YES	0.10164	0.067108	0.0089477	0.51543	0.16388	0.777778	0.555556	no
PID_TCR_JNK_PATHWAY	--	--	--	--	--	YES	--	--	YES	0.02439	0.10313	0.25932	0.38566	0.63126	0.78624	0.666667	0.666667	1	CRK, CRKL, JUN, LAT	--	--	--	--	--	YES	--	--	YES	0.02439	0.43301	0.35393	0.88803	0.9192	1	1	no
PID_ARF_3PATHWAY	--	--	--	--	--	--	--	YES	YES	0.47068	0.10631	0.020829	0.7997	0.57899	0.20351	0.571429	0.571429	0.714286	AP2M1, ARF1, ARFIP2, CD4, CLTB, COPA, CYTH2, RAC1	--	--	--	--	--	--	--	--	--	0.47068	0.21125	0.055212	0.70235	0.46621	0.571429	0.714286	no
REACTOME_BMAL1_CLOCK_NPAS2_ACTIVATES_CIRCADIAN_EXPRESSION	--	--	--	--	--	YES	--	--	YES	0.015029	0.10803	0.1555	0.21271	0.60448	0.67528	0.777778	0.777778	0.888889	BHLHE40, CREBBP, CRY1, DBP, EP300, NCOA3, NR3C1, PPARA, PPARGC1A, SERPINE1	--	--	--	--	--	YES	--	--	YES	0.015029	0.11379	0.064968	0.59677	0.47366	0.666667	0.888889	no
REACTOME_BOTULINUM_NEUROTOXICITY	--	--	--	--	--	--	--	--	--	0.15535	0.11213	0.19967	0.57923	0.61401	0.6919	0.75	1	0.75	SNAP25, STX16, STX1A, STX4, VAMP2	--	--	--	--	--	--	YES	--	YES	0.15535	0.035434	0.29771	0.41932	0.90904	1	1	no
REACTOME_PROTEOLYTIC_CLEAVAGE_OF_SNARE_COMPLEX_PROTEINS	--	--	--	--	--	--	--	--	--	0.15535	0.11213	0.19967	0.57923	0.61401	0.6919	0.75	1	0.75	SNAP25, STX16, STX1A, STX4, VAMP2	--	--	--	--	--	--	YES	--	YES	0.15535	0.035434	0.29771	0.41932	0.90904	1	1	no
REACTOME_TRANS_GOLGI_NETWORK_VESICLE_BUDDING	--	YES	--	YES	--	--	--	--	YES	0.036474	0.11224	0.01324	0.32619	0.60297	0.14307	0.875	0.875	0.875	ARF1, BLOC1S1, CLTC, HSPA8, IGF2R, PIK3C2A, SH3GL2, STX4, VAMP2	--	YES	YES	--	--	--	--	--	YES	0.036474	0.01962	0.06198	0.22232	0.46454	0.875	0.875	no
PID_ERBB1_DOWNSTREAM_PATHWAY	--	--	--	--	--	--	--	--	--	0.079465	0.11654	0.1108	0.52827	0.74095	0.67442	0.615385	0.589744	0.717949	AKT1, ARPC3, ATF1, BAD, BCL2L1, CHN2, CREB1, DUSP6, EGF, EGFR, EGR1, FOS, GRB2, HRAS, IQGAP1, JUN, MAP2K5, MAPK1, MAPK3, MAPK9, MEF2C, MYLPF, NRAS, PEBP1, PIK3CA, PIK3R3, PPP2CA, PRKCA, PRKCD, RAC1, RALA, RALGDS, RPS6, SFN, SMAD1, SRC, STAT1, STAT3, YWHAZ, ZFP36	--	--	--	--	--	--	--	YES	YES	0.079465	0.15472	0.040526	0.72857	0.52677	0.564103	0.615385	no
KEGG_LYSINE_DEGRADATION	--	--	--	--	--	--	--	YES	YES	0.11152	0.12302	0.0077299	0.50884	0.63517	0.071194	0.7	0.5	0.4	AADAT, AASDH, ACAT2, ALDH2, ALDH3A2, ALDH7A1, ALDH9A1, HADH, HADHA, PLOD3, SUV39H1	--	--	--	--	--	--	--	--	--	0.11152	0.13031	0.22501	0.58387	0.87706	0.6	0.6	no
KEGG_GLYOXYLATE_AND_DICARBOXYLATE_METABOLISM	--	--	--	--	--	--	--	YES	YES	0.44942	0.12311	0.031069	0.79463	0.64137	0.29808	1	1	0.75	ACO2, CS, HAO2, MTHFD1L, MTHFD2	--	--	--	--	--	--	--	YES	YES	0.44942	0.081538	0.024557	0.53651	0.39287	1	1	no
KEGG_BETA_ALANINE_METABOLISM	--	--	--	--	--	YES	--	--	YES	0.0011792	0.12357	0.050687	0.081872	0.64091	0.34288	0.666667	0.5	0.5	ACADM, ALDH2, ALDH3A2, ALDH7A1, ALDH9A1, GAD1, HADHA	--	--	--	--	--	YES	--	--	YES	0.0011792	0.082172	0.17696	0.53777	0.74967	0.5	0.333333	no
KEGG_BIOSYNTHESIS_OF_UNSATURATED_FATTY_ACIDS	--	--	--	--	--	YES	--	--	YES	0.026526	0.12545	0.3683	0.29911	0.62901	0.90027	0.75	0.5	0.5	ACAA1, ACOX1, BAAT, ELOVL2, ELOVL5, ELOVL6, HADHA, HSD17B12, PECR	--	--	--	--	--	YES	--	--	YES	0.026526	0.15141	0.41149	0.59549	0.94693	0.5	0.625	no
BIOCARTA_PITX2_PATHWAY	--	--	--	--	--	YES	--	--	YES	0.010241	0.13009	0.11749	0.19411	0.63311	0.58536	1	1	1	AXIN1, CREBBP, CTNNB1, EP300, FZD1, GSK3B, HDAC1, LEF1	--	YES	--	YES	--	--	--	--	YES	0.010241	0.11885	0.028902	0.58525	0.34509	1	1	no
REACTOME_RESPONSE_TO_ELEVATED_PLATELET_CYTOSOLIC_CA2_	--	--	--	--	--	YES	--	--	YES	0.012953	0.13284	0.20995	0.29614	0.75718	0.83495	0.526316	0.526316	0.578947	A2M, ABCC4, ACTN2, ALDOA, APOA1, APP, CALU, CD36, CFD, CLU, EGF, F13A1, F5, FGA, FGG, FN1, HGF, HSPA5, ITGA2B, PDGFA, PDGFB, PECAM1, PF4, PFN1, PLG, PPIA, PRKCA, PROS1, SELP, SERPINE1, SERPING1, SOD1, STX4, TGFB1, TGFB3, TIMP1, TUBA4A, VEGFA, VWF	--	YES	--	YES	--	--	--	--	YES	0.012953	0.25036	0.044747	0.86746	0.54313	0.5	0.526316	no
REACTOME_GOLGI_ASSOCIATED_VESICLE_BIOGENESIS	--	--	--	--	--	--	--	YES	YES	0.053815	0.13446	0.024874	0.38816	0.64318	0.21665	0.857143	0.857143	0.857143	ARF1, BLOC1S1, CLTC, HSPA8, IGF2R, PIK3C2A, SH3GL2, VAMP2	--	--	--	--	--	--	YES	--	YES	0.053815	0.034748	0.052621	0.38095	0.45973	0.857143	0.857143	no
BIOCARTA_IL6_PATHWAY	--	--	--	--	--	--	--	--	--	0.20895	0.15493	0.16683	0.62195	0.7389	0.68856	0.727273	0.545455	0.727273	CEBPB, FOS, GRB2, HRAS, IL6, JAK1, JAK2, JUN, MAPK3, SHC1, STAT3, TYK2	--	--	--	--	--	--	--	YES	YES	0.20895	0.094653	0.045238	0.57139	0.39123	0.636364	0.545455	no
PID_RETINOIC_ACID_PATHWAY	--	--	--	--	--	YES	--	--	YES	0.029249	0.15663	0.14914	0.3223	0.74667	0.69896	0.8	0.666667	0.8	AKT1, CCNH, CDK1, CDK7, CREBBP, EP300, HDAC1, MAPK1, MAPK14, MAPK3, MNAT1, NCOA3, NCOR2, NRIP1, PRKACA, PRKCA	--	--	--	--	--	YES	--	--	YES	0.029249	0.11687	0.26927	0.579	0.90932	0.6	0.8	no
REACTOME_MAPK_TARGETS_NUCLEAR_EVENTS_MEDIATED_BY_MAP_KINASES	--	--	--	--	--	YES	--	--	YES	0.018543	0.15791	0.18796	0.24857	0.74477	0.76686	0.666667	0.666667	0.733333	ATF1, CREB1, DUSP3, DUSP4, DUSP6, FOS, JUN, MAPK1, MAPK10, MAPK14, MAPK3, MAPK9, MAPKAPK2, MEF2C, PPP2CA, RPS6KA1	--	YES	YES	--	--	--	--	--	YES	0.018543	0.04935	0.0786	0.4498	0.574	0.6	0.733333	no
PID_HNF3B_PATHWAY	--	--	--	--	--	YES	--	--	YES	0.023476	0.15853	0.22026	0.30034	0.76829	0.82652	0.583333	0.458333	0.583333	ACADM, ACADVL, AFP, AKT1, ALAS1, ALDOB, APOA1, BDH1, CEBPA, CEBPB, CEBPD, CPT1B, CREB1, F2, FOXA1, G6PC, HADH, HMGCS1, HNF1A, HNF4A, IGFBP1, INS, NR3C1, SLC2A2, TTR	--	--	--	--	--	YES	--	--	YES	0.023476	0.54917	0.32304	0.97706	0.90948	0.541667	0.333333	no
KEGG_VALINE_LEUCINE_AND_ISOLEUCINE_DEGRADATION	--	YES	--	YES	--	--	--	--	YES	0.016782	0.16106	0.023115	0.22996	0.75304	0.21801	0.722222	0.555556	0.611111	ACAA1, ACADM, ACAT2, ALDH2, ALDH3A2, ALDH6A1, ALDH7A1, ALDH9A1, BCAT1, BCAT2, DLD, HADH, HADHA, HMGCS1, HMGCS2, HSD17B10, IL4I1, OXCT1, PCCB	--	--	--	--	--	YES	--	--	YES	0.016782	0.089667	0.11995	0.61288	0.70196	0.666667	0.555556	no
BIOCARTA_AGR_PATHWAY	--	--	--	--	--	YES	--	--	YES	0.023207	0.16244	0.20762	0.27083	0.73928	0.80644	0.764706	0.529412	0.705882	ACTA1, CTTN, DAG1, EGFR, ITGB1, JUN, LAMA2, LAMA3, MAPK1, MAPK3, PAK1, PAK4, PAK6, PAK7, PTK2, PXN, RAC1, SRC	--	--	--	--	--	YES	--	--	YES	0.023207	0.12839	0.065617	0.59926	0.5501	0.588235	0.764706	no
REACTOME_RESPIRATORY_ELECTRON_TRANSPORT_ATP_SYNTHESIS_BY_CHEMIOSMOTIC_COUPLING_AND_HEAT_PRODUCTION_BY_UNCOUPLING_PROTEINS_	--	--	--	--	--	--	--	YES	YES	0.40694	0.1704	0.0017442	0.78983	0.76512	0.018356	0.52381	0.666667	0.428571	ATP5A1, ATP5B, ATP5E, ATP5O, COX6B1, CYCS, CYTB, ETFB, NDUFA1, NDUFA5, NDUFA9, NDUFB10, NDUFB5, NDUFB6, NDUFS2, NDUFS7, NDUFV1, NDUFV2, NDUFV3, SDHA, SDHB, UQCRFS1	--	--	--	--	--	--	--	--	--	0.40694	0.10655	0.27035	0.593	0.92242	0.619048	0.619048	no
KEGG_SULFUR_METABOLISM	--	--	--	--	--	--	--	--	--	0.23265	0.17332	0.061668	0.64364	0.76555	0.59234	0.5	0.5	1	BPNT1, CHST11, PAPSS1	--	--	--	--	YES	--	--	--	YES	0.23265	0.028792	0.027256	0.53233	0.57539	0.5	1	no
PID_MET_PATHWAY	--	--	--	--	--	YES	--	--	YES	0.019523	0.17599	0.36487	0.33489	0.78398	0.93509	0.625	0.46875	0.625	AKT1, BAD, CDH1, CRK, CRKL, CTNNB1, EGR1, EIF4E, EIF4EBP1, ETS1, GRB2, HGF, HRAS, INPP5D, JUN, KPNB1, MAPK1, MAPK3, MET, NCK1, NCK2, PAK1, PAK4, PIK3CA, PLCG1, PTK2, PTPN1, PXN, RAC1, RHOA, SH3GL2, SHC1, SRC	--	YES	YES	--	--	--	--	--	YES	0.019523	0.045261	0.1825	0.54145	0.87682	0.5625	0.59375	no
REACTOME_CITRIC_ACID_CYCLE_TCA_CYCLE	--	--	--	--	--	--	--	--	--	0.25118	0.17743	0.21116	0.63818	0.74482	0.72596	0.666667	0.833333	0.5	ACO2, CS, DLD, IDH3A, IDH3G, SDHA, SDHB	--	--	--	--	--	--	--	YES	YES	0.25118	0.081769	0.027712	0.54211	0.33812	0.833333	0.666667	no
KEGG_PHENYLALANINE_METABOLISM	--	--	--	--	--	--	--	--	--	0.96283	0.17781	0.065866	0.99084	0.74699	0.43659	1	0.75	0.5	GOT1, IL4I1, MAOA, MAOB, MIF	--	--	--	--	--	--	--	YES	YES	0.96283	0.10952	0.015902	0.60873	0.36405	0.75	0.75	no
KEGG_LIMONENE_AND_PINENE_DEGRADATION	--	--	--	--	--	YES	--	--	YES	0.0048914	0.17918	0.050124	0.22518	0.74263	0.37109	0.75	0.5	0.5	ALDH2, ALDH3A2, ALDH7A1, ALDH9A1, HADHA	--	--	--	--	--	YES	--	--	YES	0.0048914	0.16932	0.27053	0.60041	0.88076	0.5	0.5	no
REACTOME_CIRCADIAN_CLOCK	--	--	--	--	--	YES	--	--	YES	0.03529	0.18023	0.39358	0.32399	0.76535	0.95045	0.647059	0.588235	0.647059	BHLHE40, CREB1, CREBBP, CRY1, CSNK1E, CUL1, DBP, ELOVL3, EP300, HIF1A, MEF2C, NCOA3, NR3C1, PPARA, PPARGC1A, RPS27A, SERPINE1, SKP1	--	--	--	--	--	YES	--	--	YES	0.03529	0.094321	0.10986	0.60454	0.65424	0.529412	0.764706	no
PID_NFAT_3PATHWAY	--	--	--	--	--	--	--	--	--	0.1356	0.18284	0.095743	0.58414	0.78196	0.59992	0.818182	0.681818	0.545455	BAD, BAX, BCL2L1, CASP3, CREBBP, CSNK1A1, EP300, FKBP1A, GSK3B, KPNB1, MAPK14, MAPK3, MAPK9, NFATC3, NR4A1, PRKACA, PRKCA, PRKCD, PRKCH, PRKCQ, RAN, SFN, YWHAZ	--	--	--	--	YES	--	--	--	YES	0.1356	0.031716	0.015337	0.41686	0.24624	0.636364	0.818182	no
BIOCARTA_RANKL_PATHWAY	--	--	--	--	--	YES	--	--	YES	0.035743	0.19437	0.28898	0.33606	0.76695	0.83926	0.714286	0.857143	0.714286	EIF2AK2, FOS, FOSL1, IFNAR1, IFNB1, NFKB1, RELA, TRAF6	--	YES	--	YES	--	--	--	--	YES	0.035743	0.078973	0.0047837	0.53424	0.14461	0.857143	0.714286	no
BIOCARTA_BARR_MAPK_PATHWAY	--	--	--	--	--	YES	--	--	YES	0.042536	0.20065	0.44682	0.38346	0.76203	0.9522	1	0.6	0.8	DNM1, GNAS, GNB1, GNGT1, MAPK1, MAPK3	--	--	--	--	--	YES	--	--	YES	0.042536	0.13294	0.086789	0.57253	0.57211	1	1	no
SA_B_CELL_RECEPTOR_COMPLEXES	--	--	--	--	--	YES	--	--	YES	0.022669	0.20584	0.22755	0.24772	0.7687	0.80366	0.636364	0.727273	0.727273	FOS, GRB2, HRAS, JUN, LYN, MAPK1, MAPK3, RAC1, RPS6KA1, SHC1, SYK, VAV3	--	YES	YES	--	--	--	--	--	YES	0.022669	0.045941	0.05669	0.40365	0.45958	0.727273	0.636364	no
REACTOME_LIPID_DIGESTION_MOBILIZATION_AND_TRANSPORT	--	--	--	--	--	YES	--	--	YES	0.0098717	0.21036	NA	0.18105	0.80079	NA	0.611111	0.666667	0.777778	A2M, ABCG1, APOA1, APOA5, APOC3, APOE, CAV1, FABP4, LCAT, LDLR, LIPC, LPL, P4HB, PNLIP, PRKACA, PRKACB, SAR1B, SCARB1, SDC1	--	--	--	--	--	YES	--	--	YES	0.0098717	0.35597	0.35295	0.89092	0.91706	0.555556	0.5	no
PID_FGF_PATHWAY	--	--	--	--	--	YES	--	--	YES	0.0056883	0.23507	0.53937	0.17836	0.84478	0.97321	0.517241	0.482759	0.655172	AKT1, CDH1, CDH2, CTNND1, CTTN, FGF1, FGF2, FGF4, FGFR2, FGFR4, FOS, FRS2, GRB2, HGF, JUN, MAPK1, MAPK3, MET, MMP9, PAK4, PIK3CA, PLAU, PLCG1, PTK2B, RPS6KA1, SHC1, SPP1, SRC, STAT1, STAT5B	--	--	--	--	--	YES	--	--	YES	0.0056883	0.058933	0.23466	0.53502	0.90254	0.689655	0.551724	no
PID_HDAC_CLASSIII_PATHWAY	--	--	--	--	--	--	--	--	--	0.72349	0.24276	0.16026	0.92633	0.84716	0.67952	0.75	0.75	0.666667	BAX, CDKN1A, CREBBP, EP300, FHL2, FOXO3, FOXO4, HOXA10, PPARGC1A, SIRT3, TP53, TUBA1B, TUBB2A	--	--	--	--	--	--	--	YES	YES	0.72349	0.31134	0.040437	0.85334	0.3946	0.75	0.75	no
PID_ALPHA_SYNUCLEIN_PATHWAY	--	--	--	--	--	--	--	--	--	0.074173	0.2466	0.52189	0.43251	0.83969	0.98274	0.8	0.533333	0.733333	BAD, FKBP1A, FYN, LYN, MAOB, MAPK1, MAPK3, PRKCD, PTK2B, SLC6A3, SNCA, SRC, STUB1, SYK, TH, TOR1A	--	--	--	--	YES	--	--	--	YES	0.074173	0.020084	0.039587	0.24757	0.39888	0.8	0.733333	no
REACTOME_HDL_MEDIATED_LIPID_TRANSPORT	--	--	--	--	--	YES	--	--	YES	0.031053	0.24905	NA	0.32913	0.81203	NA	0.666667	0.5	1	A2M, ABCG1, APOA1, APOC3, APOE, LCAT, SCARB1	--	--	--	--	--	YES	--	--	YES	0.031053	0.26307	0.11797	0.7926	0.61034	0.666667	0.5	no
REACTOME_MAP_KINASE_ACTIVATION_IN_TLR_CASCADE	--	--	--	--	--	YES	--	--	YES	0.010861	0.25463	0.16385	0.20635	0.84784	0.72462	0.7	0.7	0.7	ATF1, CDK1, CREB1, DUSP3, DUSP4, DUSP6, FOS, IKBKG, JUN, MAPK1, MAPK10, MAPK14, MAPK3, MAPK9, MAPKAPK2, MAPKAPK3, MEF2C, PPP2CA, RPS6KA1, TAB2, TRAF6	--	YES	YES	--	--	--	--	--	YES	0.010861	0.030517	0.10817	0.39779	0.6391	0.65	0.75	no
REACTOME_SPRY_REGULATION_OF_FGF_SIGNALING	--	--	--	--	--	YES	--	--	YES	0.030071	0.28037	0.83357	0.32443	0.83665	0.99818	0.833333	0.5	0.833333	GRB2, MAPK1, MAPK3, MKNK1, PPP2CA, RPS27A, SRC	--	--	--	--	--	YES	--	--	YES	0.030071	0.24692	0.29295	0.77547	0.90858	0.666667	0.666667	no
KEGG_SELENOAMINO_ACID_METABOLISM	--	--	--	--	--	--	--	YES	YES	0.67736	0.28465	0.0097349	0.914	0.8492	0.17546	0.5	0.5	0.75	CTH, GGT7, MAT1A, MAT2A, PAPSS1	--	--	--	--	--	--	--	--	--	0.67736	0.56714	0.5	0.98164	0.93772	0.75	0.5	no
REACTOME_ADVANCED_GLYCOSYLATION_ENDPRODUCT_RECEPTOR_SIGNALING	--	--	--	--	--	YES	--	--	YES	0.027979	0.28857	0.33223	0.32611	0.84396	0.83646	1	0.5	0.5	APP, MAPK1, MAPK3, S100B, SAA1	--	--	--	--	--	YES	--	--	YES	0.027979	0.14335	0.218	0.58597	0.83741	0.75	0.75	no
PID_TRAIL_PATHWAY	--	--	--	--	--	YES	--	--	YES	0.02861	0.29158	0.92331	0.30862	0.87381	1	0.7	0.6	0.9	CASP8, CFLAR, CHUK, IKBKB, IKBKG, MAPK1, MAPK3, PIK3CA, PIK3R3, RIPK1, TNFSF10	--	--	--	--	--	YES	--	--	YES	0.02861	0.25845	0.36599	0.81289	0.91714	0.8	0.7	no
PID_PS1_PATHWAY	--	--	--	--	--	YES	--	--	YES	0.012446	0.29357	0.40484	0.19984	0.89443	0.95776	0.761905	0.619048	0.714286	ADAM10, APH1B, AXIN1, CCND1, CREBBP, CSNK1A1, CTNNB1, DLL1, FOS, FZD1, GSK3B, HDAC1, HNF1A, JUN, LRP6, MAPK1, MAPK3, MYC, NOTCH1, PPARD, PSEN1, TLE1	--	YES	--	YES	--	--	--	--	YES	0.012446	0.14642	0.034354	0.67716	0.38873	0.714286	0.809524	no
KEGG_PARKINSONS_DISEASE	--	--	--	--	--	--	--	YES	YES	0.39531	0.29741	0.0036266	0.79108	0.91281	0.062889	0.5	0.5	0.5	ATP5A1, ATP5B, ATP5E, ATP5O, CASP3, COX6A2, COX6B1, COX7A1, CYCS, CYTB, NDUFA1, NDUFA5, NDUFA9, NDUFB10, NDUFB5, NDUFB6, NDUFS2, NDUFS7, NDUFV1, NDUFV2, NDUFV3, PINK1, PPID, SDHA, SDHB, SEPT5, SLC18A2, SLC25A31, SLC25A4, SLC6A3, SNCA, TH, UBE2J1, UBE2L6, UQCRFS1, VDAC1, VDAC2	--	--	--	--	--	--	--	--	--	0.39531	0.1781	0.17079	0.77255	0.85671	0.5	0.555556	no
BIOCARTA_ETC_PATHWAY	--	--	--	--	--	--	--	--	--	0.064202	0.29841	0.059714	0.42	0.84131	0.36862	0.6	0.8	0.6	ATP5A1, CYCS, NDUFA1, SDHA, SDHB, SLC25A4	--	--	--	--	--	--	--	YES	YES	0.064202	0.10899	0.010925	0.59634	0.26642	0.8	0.8	no
BIOCARTA_DREAM_PATHWAY	--	--	--	--	--	YES	--	--	YES	0.019877	0.30391	0.30168	0.31929	0.84688	0.83533	0.6	0.4	0.6	CREB1, FOS, JUN, MAPK3, PRKACB, PRKAR2B	--	--	--	--	--	YES	--	--	YES	0.019877	0.14999	0.11471	0.59653	0.61883	0.6	0.6	no
KEGG_GLYCEROLIPID_METABOLISM	--	YES	--	YES	--	--	--	--	YES	0.041527	0.31381	0.013679	0.32761	0.89053	0.12543	0.555556	0.555556	0.888889	ALDH2, ALDH3A2, ALDH7A1, ALDH9A1, CEL, LIPC, LPL, MBOAT2, PNLIP, PNLIPRP1	--	--	--	--	--	YES	--	--	YES	0.041527	0.25462	0.23245	0.80175	0.8697	0.444444	0.444444	no
BIOCARTA_KREB_PATHWAY	--	--	--	--	--	YES	--	--	YES	0.046057	0.34583	0.076214	0.50221	0.8906	0.62873	1	1	1	ACO2, CS, SDHA	--	YES	--	YES	--	--	--	--	YES	0.046057	0.11415	0.030487	0.59403	0.5629	1	1	no
KEGG_VIBRIO_CHOLERAE_INFECTION	--	--	--	--	--	--	--	--	--	0.33884	0.34878	0.2628	0.75106	0.92551	0.8427	0.625	0.5	0.5	ARF1, ATP6AP1, ATP6V0B, ATP6V0D1, ATP6V1C1, ATP6V1D, ATP6V1F, ATP6V1G2, ERO1L, GNAS, KDELR2, PLCG1, PRKACA, PRKACB, PRKCA, PRKX, TJP1	--	--	--	--	--	--	YES	--	YES	0.33884	0.032895	0.09615	0.38822	0.60614	0.625	0.6875	no
ST_DIFFERENTIATION_PATHWAY_IN_PC12_CELLS	--	--	--	--	--	YES	--	--	YES	0.024006	0.35215	0.52591	0.30232	0.92409	0.97014	0.590909	0.454545	0.636364	AKT1, ASAH1, ATF1, CAMP, CREB1, CREBBP, CRKL, DAG1, EGR1, EGR2, FRS2, GNAQ, JUN, MAPK1, MAPK10, MAPK3, MAPK9, NTRK1, PIK3CA, SHC1, SRC, TERF2IP, TH	--	--	--	--	--	YES	--	--	YES	0.024006	0.10176	0.095855	0.57504	0.63652	0.5	0.681818	no
REACTOME_NFKB_AND_MAP_KINASES_ACTIVATION_MEDIATED_BY_TLR4_SIGNALING_REPERTOIRE	--	--	--	--	--	YES	--	--	YES	0.019044	0.36203	0.78956	0.33151	0.94036	1	0.588235	0.529412	0.529412	APP, ATF1, CDK1, CHUK, CREB1, DUSP3, DUSP4, DUSP6, FOS, IKBKB, IKBKG, JUN, MAPK1, MAPK10, MAPK14, MAPK3, MAPK9, MAPKAPK2, MAPKAPK3, MEF2C, NFKB2, NFKBIA, NFKBIB, PPP2CA, RELA, RIPK1, RPS27A, RPS6KA1, S100B, SAA1, TAB2, TICAM1, TLR3, TLR4, TRAF6	--	--	--	--	--	YES	--	--	YES	0.019044	0.16393	0.25948	0.76678	0.92028	0.529412	0.588235	no
PID_MTOR_4PATHWAY	--	YES	--	YES	--	--	--	--	YES	0.030481	0.38935	0.010744	0.31997	0.96882	0.14755	0.625	0.625	0.625	AKT1, BNIP3, CDK2, CYCS, DDIT4, EIF4B, EIF4E, EIF4EBP1, HRAS, IKBKB, IRS1, MAPK1, MAPK3, NRAS, PPARGC1A, PRKCA, PXN, RAC1, RHEB, RHOA, RPS6KA1, RRAGA, SFN, TSC2, YWHAZ	--	--	--	--	--	YES	--	--	YES	0.030481	0.12125	0.058356	0.61537	0.54516	0.583333	0.541667	no
REACTOME_NGF_SIGNALLING_VIA_TRKA_FROM_THE_PLASMA_MEMBRANE	--	--	--	--	--	YES	--	--	YES	0.044444	0.4105	0.2112	0.49188	0.98676	0.84179	0.563636	0.527273	0.672727	ADCY6, ADCY7, AKT1, AKT3, AP2M1, ATF1, BAD, CDK1, CDKN1A, CDKN1B, CHUK, CLTC, CREB1, CRK, DNM1, DUSP3, DUSP4, DUSP6, FOXO3, FOXO4, FRS2, GRB2, HRAS, IRS1, ITPR3, MAP2K5, MAPK1, MAPK13, MAPK14, MAPK3, MAPKAPK2, MAPKAPK3, MDM2, MEF2C, NR4A1, NRAS, NTRK1, PIK3CA, PLCG1, PPP2CA, PRKACA, PRKACB, PRKAR2B, PRKCA, PRKCD, RALA, RALB, RALGDS, RHOA, RPS6KA1, SH3GL2, SHC1, SRC, STAT3, TRIB3, TSC2	--	YES	YES	--	--	--	--	--	YES	0.044444	0.036364	0.14269	0.53248	0.88141	0.581818	0.581818	no
SIG_CD40PATHWAYMAP	--	--	--	--	--	YES	--	--	YES	0.0047792	0.41921	0.29511	0.15484	0.98342	0.85463	0.6	0.6	0.666667	CD40, IKBKG, MAPK1, MAPK10, MAPK13, MAPK14, MAPK3, MAPK9, MAPKAPK5, NFKB1, NFKB2, NFKBIA, NFKBIB, NFKBIE, PIK3CA, TRAF6	YES	YES	--	--	--	--	--	--	YES	0.0047792	0.037108	0.03079	0.39716	0.35509	0.6	0.666667	no
REACTOME_TRIF_MEDIATED_TLR3_SIGNALING	--	--	--	--	--	YES	--	--	YES	0.039025	0.42234	NA	0.4085	0.98676	NA	0.594595	0.513514	0.513514	APP, ATF1, CDK1, CHUK, CREB1, DUSP3, DUSP4, DUSP6, FOS, IKBKB, IKBKE, IKBKG, IRF7, JUN, MAPK1, MAPK10, MAPK14, MAPK3, MAPK9, MAPKAPK2, MAPKAPK3, MEF2C, NFKB2, NFKBIA, NFKBIB, PPP2CA, RELA, RIPK1, RIPK3, RPS27A, RPS6KA1, S100B, SAA1, TAB2, TICAM1, TLR3, TRAF6, ZBP1	--	--	--	--	--	YES	--	--	YES	0.039025	0.26906	0.25214	0.8557	0.91727	0.540541	0.621622	no
KEGG_VASOPRESSIN_REGULATED_WATER_REABSORPTION	--	--	--	--	--	--	--	--	--	0.27401	0.45917	0.56303	0.71123	0.98958	0.98685	0.583333	0.5	0.5	ADCY6, AQP3, CREB1, CREB3L3, DCTN1, DYNLL1, GNAS, PRKACA, PRKACB, PRKX, RAB11A, STX4, VAMP2	--	--	--	--	--	--	YES	--	YES	0.27401	0.021672	0.12706	0.23864	0.66293	0.666667	0.666667	no
PID_ERBB2_ERBB3_PATHWAY	--	--	--	--	--	YES	--	--	YES	0.048275	0.47013	0.6905	0.38037	0.99496	1	0.571429	0.571429	0.666667	AKT1, BAD, ERBB2, ERBB3, FOS, GRB2, HRAS, JAK2, JUN, MAPK1, MAPK10, MAPK3, MAPK9, NFATC4, NRAS, PIK3CA, PIK3R3, PRKACA, RAC1, SHC1, SRC, STAT3	--	--	--	--	--	YES	--	--	YES	0.048275	0.3601	0.089993	0.89044	0.6145	0.52381	0.619048	no
BIOCARTA_NKCELLS_PATHWAY	--	--	--	--	--	YES	--	--	YES	0.0055369	0.4787	0.28686	0.15548	0.98747	0.84582	0.666667	0.444444	1	IL18, ITGB1, LAT, MAPK3, PAK1, PIK3CA, PTK2B, PTPN6, RAC1, SYK	--	--	--	--	--	YES	--	--	YES	0.0055369	0.064968	0.10445	0.4985	0.5849	0.888889	0.777778	no
PID_IL6_7_PATHWAY	--	--	--	--	--	--	--	--	--	0.29175	0.48968	0.71201	0.74694	1	1	0.541667	0.5	0.5	A2M, AKT1, BCL2L1, CEBPB, CEBPD, CRP, FGG, FOS, GRB2, HSP90B1, IL6, JAK1, JAK2, JUN, MAPK14, MCL1, MYC, PIK3CA, PRKCD, RAC1, SOCS3, STAT1, STAT3, TIMP1, TYK2	--	--	--	--	--	--	--	YES	YES	0.29175	0.09009	0.048238	0.57705	0.45793	0.5	0.458333	no
REACTOME_L1CAM_INTERACTIONS	--	--	--	--	--	YES	--	--	YES	0.035659	0.52551	0.56915	0.39142	1	0.98928	0.518519	0.444444	0.666667	ALCAM, AP2M1, CLTC, CSNK2A2, DCX, DLG3, DNM1, EGFR, ITGA2B, ITGB1, KCNQ2, KIF4A, L1CAM, LAMB1, MAPK1, MAPK3, MSN, NRCAM, NRP1, PAK1, RAC1, RPS6KA1, SCN2A, SCN3B, SCN8A, SH3GL2, SPTAN1, SRC	--	--	--	--	--	YES	--	--	YES	0.035659	0.22354	0.8209	0.81655	1	0.555556	0.481481	no
PID_RHOA_PATHWAY	--	--	--	--	--	YES	--	--	YES	0.04291	0.53216	0.72497	0.32637	1	0.99838	0.75	0.5	0.75	ACTA1, CDKN1B, FOS, ITGB1, JUN, MSN, MYL2, RHOA, SH3GL2	--	--	--	--	--	YES	--	--	YES	0.04291	0.37396	0.060198	0.89421	0.46716	0.5	0.75	no
PID_AR_NONGENOMIC_PATHWAY	--	--	--	--	--	YES	--	--	YES	0.04588	0.54774	0.54209	0.38091	1	0.97555	0.533333	0.466667	0.6	AKT1, AR, CREB1, FOS, GNAI1, GNAI2, GNB1, HRAS, MAPK1, MAPK3, PIK3CA, PLCB3, PLCG1, PTK2, RAC1, SRC	--	--	--	--	--	YES	--	--	YES	0.04588	0.11056	0.20119	0.57693	0.8721	0.666667	0.533333	no
REACTOME_SIGNAL_TRANSDUCTION_BY_L1	--	--	--	--	--	YES	--	--	YES	0.029412	0.55796	0.27143	0.30231	1	0.83913	0.615385	0.538462	0.769231	AP2M1, CLTC, CSNK2A2, EGFR, ITGA2B, ITGB1, L1CAM, MAPK1, MAPK3, NRP1, PAK1, RAC1, RPS6KA1, SH3GL2	--	--	--	--	--	YES	--	--	YES	0.029412	0.15964	0.49362	0.65033	0.93671	0.692308	0.538462	no
REACTOME_SIGNALLING_BY_NGF	--	--	--	--	--	YES	--	--	YES	0.04057	0.58574	0.61267	0.51452	1	0.9884	0.5	0.47561	0.573171	AATF, ADCY6, ADCY7, AKT1, AKT3, AP2M1, APH1B, ARHGEF12, ARHGEF2, ATF1, BAD, BCL2L11, CASP2, CASP3, CDK1, CDKN1A, CDKN1B, CHUK, CLTC, CREB1, CRK, DNM1, DUSP3, DUSP4, DUSP6, ECT2, FOXO3, FOXO4, FRS2, FURIN, GRB2, HDAC1, HDAC2, HRAS, IKBKB, IRS1, ITPR3, MAGED1, MAP2K5, MAPK1, MAPK13, MAPK14, MAPK3, MAPKAPK2, MAPKAPK3, MDM2, MEF2C, MYD88, NET1, NFKBIA, NGFRAP1, NR4A1, NRAS, NTRK1, OBSCN, PIK3CA, PLCG…	--	--	--	--	--	YES	--	--	YES	0.04057	0.084271	0.23863	0.65194	0.91632	0.52439	0.54878	no
PID_RXR_VDR_PATHWAY	--	--	--	--	--	YES	--	--	YES	0.0091475	0.59362	0.99268	0.18467	1	1	0.7	0.5	0.7	NCOR2, NR1H2, NR1H3, NR1H4, NR4A1, PPARA, PPARD, PPARG, TGFB1, THRB, TNF	--	--	--	--	--	YES	--	--	YES	0.0091475	0.45794	0.43648	0.96186	0.93136	0.5	0.7	no
REACTOME_TRAF6_MEDIATED_INDUCTION_OF_NFKB_AND_MAP_KINASES_UPON_TLR7_8_OR_9_ACTIVATION	--	--	--	--	--	YES	--	--	YES	0.026642	0.60932	0.7352	0.32435	1	1	0.580645	0.548387	0.516129	APP, ATF1, CDK1, CHUK, CREB1, DUSP3, DUSP4, DUSP6, FOS, IKBKB, IKBKG, JUN, MAPK1, MAPK10, MAPK14, MAPK3, MAPK9, MAPKAPK2, MAPKAPK3, MEF2C, MYD88, NFKB2, NFKBIA, NFKBIB, PPP2CA, RELA, RPS27A, RPS6KA1, S100B, SAA1, TAB2, TRAF6	--	--	--	--	--	YES	--	--	YES	0.026642	0.15506	0.26416	0.70402	0.92194	0.516129	0.580645	no
BIOCARTA_EIF4_PATHWAY	--	--	--	--	--	YES	--	--	YES	0.015376	0.6247	0.19072	0.21299	1	0.74095	0.545455	0.454545	0.727273	AKT1, EIF4E, EIF4EBP1, EIF4G1, GHR, IRS1, MAPK1, MAPK14, MAPK3, MKNK1, PIK3CA, PRKCA	--	--	--	--	--	YES	--	--	YES	0.015376	0.53109	0.36133	0.96712	0.91471	0.636364	0.545455	no
PID_UPA_UPAR_PATHWAY	--	--	--	--	--	YES	--	--	YES	0.0081936	0.64125	NA	0.19238	1	NA	0.45	0.45	0.65	CRK, EGFR, FGA, FGG, FN1, FPR1, FPR2, HGF, ITGB1, ITGB2, ITGB5, MMP12, MMP9, PLAU, PLG, RAC1, SERPINE1, SRC, TGFB1, VTN	--	--	--	--	--	YES	--	--	YES	0.0081936	NA	0.43713	NA	0.93834	0.3	0.5	no
REACTOME_RESPIRATORY_ELECTRON_TRANSPORT	--	--	--	--	--	--	--	YES	YES	NA	0.66146	0.025542	NA	1	0.21602	0.411765	0.588235	0.352941	COX6B1, CYCS, CYTB, ETFB, NDUFA1, NDUFA5, NDUFA9, NDUFB10, NDUFB5, NDUFB6, NDUFS2, NDUFS7, NDUFV1, NDUFV2, NDUFV3, SDHA, SDHB, UQCRFS1	--	--	--	--	--	--	--	--	--	NA	0.48932	NA	0.95728	NA	0.529412	0.529412	no
REACTOME_MYD88_MAL_CASCADE_INITIATED_ON_PLASMA_MEMBRANE	--	--	--	--	--	YES	--	--	YES	0.021901	0.68169	0.78956	0.32623	1	1	0.529412	0.5	0.470588	APP, ATF1, BTK, CDK1, CHUK, CREB1, DUSP3, DUSP4, DUSP6, FOS, IKBKB, IKBKG, JUN, MAPK1, MAPK10, MAPK14, MAPK3, MAPK9, MAPKAPK2, MAPKAPK3, MEF2C, MYD88, NFKB2, NFKBIA, NFKBIB, PPP2CA, RELA, RPS27A, RPS6KA1, S100B, SAA1, TAB2, TLR2, TLR4, TRAF6	--	--	--	--	--	YES	--	--	YES	0.021901	0.24431	0.33028	0.85921	0.91826	0.5	0.529412	no
BIOCARTA_MAPK_PATHWAY	--	--	--	--	--	YES	--	--	YES	0.038649	0.77529	NA	0.40539	1	NA	0.472222	0.416667	0.555556	CEBPA, CHUK, CREB1, DAXX, FOS, GRB2, HRAS, IKBKB, JUN, MAP2K5, MAP3K4, MAP4K4, MAPK1, MAPK10, MAPK13, MAPK14, MAPK3, MAPK9, MAPKAPK2, MAPKAPK3, MAPKAPK5, MEF2C, MKNK1, MYC, NFKB1, NFKBIA, PAK1, RAC1, RAPGEF2, RELA, RIPK1, RPS6KA1, SHC1, STAT1, TGFB1, TGFB3, TGFBR1	--	--	--	--	--	YES	--	--	YES	0.038649	0.60921	0.16664	1	0.88069	0.5	0.5	no
BIOCARTA_NDKDYNAMIN_PATHWAY	--	--	--	--	--	--	--	YES	YES	NA	0.8557	0.044458	NA	1	0.56198	0.5	1	0.5	AP2M1, DNM1, NME1	--	--	--	--	--	--	--	--	--	NA	NA	NA	NA	NA	0.5	0.5	no
REACTOME_G_ALPHA_S_SIGNALLING_EVENTS	--	--	--	--	--	YES	--	--	YES	0.036525	0.87578	0.79961	0.32207	1	0.99994	0.444444	0.5	0.388889	ADCY6, ADCY7, ADM, ADRB2, CGA, FSHB, GNAI1, GNAI2, GNAS, GNB1, GNB5, GNG3, GNGT1, INSL3, LHB, PDE4C, PTGER2, PTGER4, RAMP2	--	--	--	--	--	YES	--	--	YES	0.036525	0.73927	0.28814	0.98919	0.92213	0.555556	0.5	no
PID_CD40_PATHWAY	--	--	--	--	--	--	--	--	--	0.30322	0.99191	0.93421	0.74431	1	0.99973	0.470588	0.588235	0.294118	AKT1, BCL2L1, BIRC2, BIRC3, CBLB, CD40, IL4, JUN, MAPK10, MAPK14, MAPK9, MYC, NFKB1, NFKBIA, RELA, STAT5A, TNFAIP3, TRAF6	--	--	--	--	--	--	--	YES	YES	0.30322	0.91473	0.032621	1	0.3671	0.470588	0.588235	no
KEGG_ARRHYTHMOGENIC_RIGHT_VENTRICULAR_CARDIOMYOPATHY_ARVC	--	--	--	--	--	YES	--	--	YES	0.034714	0.99227	NA	0.32758	1	NA	0.529412	0.235294	0.411765	ACTN2, ACTN3, CACNA1S, CACNA2D3, CDH2, CTNNB1, DAG1, DSC2, DSG2, GJA1, ITGA2B, ITGA6, ITGB1, ITGB5, LAMA2, LEF1, SGCA, SGCB	--	--	--	--	--	YES	--	--	YES	0.034714	0.92974	0.30502	0.99854	0.91377	0.352941	0.588235	no
KEGG_RIBOSOME	--	--	--	--	--	YES	--	--	YES	0.018876	NA	0.51769	0.24792	NA	0.96561	0.428571	0.571429	0.857143	MRPL13, RPL22, RPL3L, RPLP0, RPS27A, RPS27L, RPS5, RPS6	--	--	--	--	--	YES	--	--	YES	0.018876	NA	NA	NA	NA	0.285714	0.428571	no
PID_CERAMIDE_PATHWAY	--	--	--	--	--	YES	--	--	YES	0.048923	NA	0.68899	0.38279	NA	1	0.521739	0.434783	0.695652	AKT1, ASAH1, BAD, BAX, BID, BIRC3, CASP8, CTSD, CYCS, EGF, EIF2AK2, IGF1, MAP4K4, MAPK1, MAPK3, MYC, NFKB1, NFKBIA, PDGFA, PRKCD, RB1, RELA, RIPK1, TNF	--	--	--	--	--	YES	--	--	YES	0.048923	0.38668	0.30402	0.91814	0.91567	0.608696	0.478261	no
REACTOME_PEPTIDE_CHAIN_ELONGATION	--	--	--	--	--	YES	--	--	YES	0.045319	NA	0.78768	0.37873	NA	0.99501	0.4	0.4	0.8	RPL22, RPL3L, RPLP0, RPS27A, RPS5, RPS6	--	--	--	--	--	YES	--	--	YES	0.045319	NA	NA	NA	NA	0.2	0.4	no
KEGG_ADIPOCYTOKINE_SIGNALING_PATHWAY	--	--	--	--	--	YES	--	--	YES	0.016837	NA	NA	0.30237	NA	NA	0.566667	0.466667	0.5	ADIPOQ, AKT1, AKT3, CD36, CHUK, CPT1B, G6PC, IKBKB, IKBKG, IRS1, JAK2, MAPK10, MAPK9, NFKB1, NFKBIA, NFKBIB, NFKBIE, PCK2, PPARA, PPARGC1A, PRKAA1, PRKAA2, PRKAB1, PRKAB2, PRKAG1, PRKAG2, PRKCQ, RELA, SOCS3, STAT3, TNF	--	--	--	--	--	YES	--	--	YES	0.016837	0.53927	0.34031	0.96783	0.91323	0.566667	0.533333	no

## Sheet: TableS5
Table S5. Down-regulated canonical pathways identified as associated with exposure to Cr(VI), captan, and/or folpet exposures, based on distinct-directional enrichment analysis enabled through Gene Set Enrichment Analysis (GSEA). Statistics are listed for pathways identified as significantly (p<0.05) associated with at least one exposure condition. Results are organizing such that the first colum…
Canonical Pathway Name	Significant in Cr(VI) AND Captan (12000 ppm) AND Folpet (16000 ppm)	Significant in Cr(VI) AND Captan (12000 ppm) AND/OR Folpet (16000 ppm)	Significant in Cr(VI) and Captan (12000 ppm) NOT Folpet (16000 ppm)	Significant in Cr(VI) and Folpet (16000 ppm) NOT Captan (12000 ppm)	Significant in Captan (12000 ppm) AND Folpet (16000 ppm) NOT Cr(VI)	Significant in Cr(VI) ONLY	Significant in Captan ONLY	Significant in Folpet ONLY	Significant in Any	Cr(VI) p-value	Captan (12000 ppm) p-value	Folpet (16000 ppm) p-value	Captan (12000 ppm) adj p-value	Folpet (16000 ppm) adj p-value	Captan (12000 ppm) % of Genes in Pathway with Down-regulated Expression	Folpet (16000 ppm) % of Genes in Pathway with Down-regulated Expression	Genes in Pathway from S1500+ List	Significant in Cr(VI) AND Captan (6000 ppm) AND Folpet (6000 ppm)	Significant in Cr(VI) AND Captan (6000 ppm) AND/OR Folpet (6000 ppm)	Significant in Cr(VI) and Captan (6000 ppm) NOT Folpet (6000 ppm)	Significant in Cr(VI) and Folpet (6000 ppm) NOT Captan (6000 ppm)	Significant in Captan (6000 ppm) AND Folpet (6000 ppm) NOT Cr(VI)	Significant in Cr(VI) ONLY	Significant in Captan ONLY	Significant in Folpet ONLY	Significant in Any	Cr(VI) p-value	Captan (6000 ppm) p-value	Folpet (6000 ppm) p-value	Cr(VI) adjusted p-value (FDR)	Captan (6000 ppm) adjusted p-value (FDR)	Folpet (6000 ppm) adjusted p-value (FDR)	Cr(VI) % of Genes in Pathway with Down-regulated Expression	Captan (6000 ppm) % of Genes in Pathway with Down-regulated Expression	Folpet (6000 ppm) % of Genes in Pathway with Down-regulated Expression	Genes in Pathway from S1500+ List	Potentially relevant to DNA damage?
REACTOME_TRANSPORT_OF_MATURE_TRANSCRIPT_TO_CYTOPLASM	--	--	--	--	--	YES	--	--	YES	0.00020886	0.19337	0.060819	0.77463	0.69704	0.588235	0.647059	AAAS, CPSF1, EIF4E, MAGOH, NCBP1, NCBP2, NUP133, NUP37, NUP62, NUP85, NUP88, NUP93, RAE1, RNPS1, SRSF1, SRSF3, SRSF6, U2AF1	YES	YES	--	--	--	--	--	--	YES	0.00020886	0.032453	0.014139	0.008188	0.45567	0.52322	0.882353	0.882353	0.823529	AAAS, CPSF1, EIF4E, MAGOH, NCBP1, NCBP2, NUP133, NUP37, NUP62, NUP85, NUP88, NUP93, RAE1, RNPS1, SRSF1, SRSF3, SRSF6, U2AF1	no
REACTOME_MEIOTIC_RECOMBINATION	--	--	--	--	--	YES	--	--	YES	0.00020986	0.10939	0.10959	0.77751	0.7648	0.52	0.64	BLM, BRCA1, BRCA2, CDK2, CDK4, H2AFX, H2AFZ, HIST1H2AC, HIST1H2BB, HIST1H2BC, HIST1H2BD, HIST1H2BE, HIST1H2BG, HIST1H2BI, HIST1H2BM, HIST1H2BN, HIST1H2BO, HIST1H3B, HIST1H3D, HIST1H3J, HIST2H3D, RAD51, RAD51C, RPA1, RPA2, RPA3	--	YES	YES	--	--	--	--	--	YES	0.00020986	0.023423	0.24961	0.0026127	0.4659	0.88923	0.92	0.68	0.72	BLM, BRCA1, BRCA2, CDK2, CDK4, H2AFX, H2AFZ, HIST1H2AC, HIST1H2BB, HIST1H2BC, HIST1H2BD, HIST1H2BE, HIST1H2BG, HIST1H2BI, HIST1H2BM, HIST1H2BN, HIST1H2BO, HIST1H3B, HIST1H3D, HIST1H3J, HIST2H3D, RAD51, RAD51C, RPA1, RPA2, RPA3	no
REACTOME_MEIOSIS	--	--	--	--	--	YES	--	--	YES	0.00021048	0.10458	0.19648	0.77113	0.87283	0.5	0.647059	ACD, BLM, BRCA1, BRCA2, CDK2, CDK4, H2AFX, H2AFZ, HIST1H2AC, HIST1H2BB, HIST1H2BC, HIST1H2BD, HIST1H2BE, HIST1H2BG, HIST1H2BI, HIST1H2BM, HIST1H2BN, HIST1H2BO, HIST1H3B, HIST1H3D, HIST1H3J, HIST2H3D, HSPA2, LMNB1, RAD21, RAD51, RAD51C, RPA1, RPA2, RPA3, SMC1A, SMC3, SYCP1, SYNE2, TERF2IP	--	YES	YES	--	--	--	--	--	YES	0.00021048	0.048276	0.18571	0.0038724	0.66724	0.86745	0.823529	0.647059	0.647059	ACD, BLM, BRCA1, BRCA2, CDK2, CDK4, H2AFX, H2AFZ, HIST1H2AC, HIST1H2BB, HIST1H2BC, HIST1H2BD, HIST1H2BE, HIST1H2BG, HIST1H2BI, HIST1H2BM, HIST1H2BN, HIST1H2BO, HIST1H3B, HIST1H3D, HIST1H3J, HIST2H3D, HSPA2, LMNB1, RAD21, RAD51, RAD51C, RPA1, RPA2, RPA3, SMC1A, SMC3, SYCP1, SYNE2, TERF2IP	no
KEGG_SYSTEMIC_LUPUS_ERYTHEMATOSUS	YES	YES	--	--	--	--	--	--	YES	0.00021404	0.0063399	0.014487	0.43588	0.49668	0.583333	0.694444	ACTN2, ACTN3, C1QA, C1QB, C1QC, C1R, C3, C5, C8A, C8B, CD40, CD80, CD86, FCGR2A, GRIN2A, GRIN2B, H2AFV, H2AFX, H2AFZ, HIST1H2AC, HIST1H2BB, HIST1H2BC, HIST1H2BD, HIST1H2BE, HIST1H2BG, HIST1H2BI, HIST1H2BM, HIST1H2BN, HIST1H2BO, HIST1H3B, HIST1H3D, HIST1H3J, HIST2H3D, IFNG, IL10, SNRPB, TNF	--	YES	YES	--	--	--	--	--	YES	0.00021404	0.0010881	0.07787	0.0037013	0.042124	0.76131	0.833333	0.722222	0.694444	ACTN2, ACTN3, C1QA, C1QB, C1QC, C1R, C3, C5, C8A, C8B, CD40, CD80, CD86, FCGR2A, GRIN2A, GRIN2B, H2AFV, H2AFX, H2AFZ, HIST1H2AC, HIST1H2BB, HIST1H2BC, HIST1H2BD, HIST1H2BE, HIST1H2BG, HIST1H2BI, HIST1H2BM, HIST1H2BN, HIST1H2BO, HIST1H3B, HIST1H3D, HIST1H3J, HIST2H3D, IFNG, IL10, SNRPB, TNF	no
REACTOME_CELL_CYCLE	--	--	--	--	--	YES	--	--	YES	0.00023663	0.90545	0.94473	0.95675	0.96372	0.518072	0.560241	ACD, ANAPC2, AURKA, AURKB, BIRC5, BRCA1, BUB1, BUB1B, CASC5, CCNA1, CCNA2, CCNB1, CCNB2, CCND1, CCND2, CCND3, CCNE2, CCNH, CDC20, CDC25A, CDC25B, CDC25C, CDC45, CDC6, CDCA8, CDK1, CDK2, CDK4, CDK6, CDK7, CDKN1A, CDKN1B, CDKN2A, CDKN2B, CDT1, CENPH, CENPI, CENPK, CENPL, CENPQ, CEP57, CETN2, CHEK1, CHEK2, CKS1B, CSNK1E, CUL1, DCTN1, DHFR, DKC1, DNA2, DYNLL1, E2F1, E2F2, FBXO5, FEN1, GMNN, H2AFX, H2…	--	--	--	--	--	YES	--	--	YES	0.00023663	0.28742	0.34922	0.13314	0.97008	0.95582	0.692771	0.620482	0.596386	ACD, ANAPC2, AURKA, AURKB, BIRC5, BRCA1, BUB1, BUB1B, CASC5, CCNA1, CCNA2, CCNB1, CCNB2, CCND1, CCND2, CCND3, CCNE2, CCNH, CDC20, CDC25A, CDC25B, CDC25C, CDC45, CDC6, CDCA8, CDK1, CDK2, CDK4, CDK6, CDK7, CDKN1A, CDKN1B, CDKN2A, CDKN2B, CDT1, CENPH, CENPI, CENPK, CENPL, CENPQ, CEP57, CETN2, CHEK1, CHEK2, CKS1B, CSNK1E, CUL1, DCTN1, DHFR, DKC1, DNA2, DYNLL1, E2F1, E2F2, FBXO5, FEN1, GMNN, H2AFX, H2…	no
REACTOME_PROCESSING_OF_CAPPED_INTRON_CONTAINING_PRE_MRNA	--	--	--	--	--	YES	--	--	YES	0.00042808	0.30188	0.15347	0.82819	0.87582	0.583333	0.527778	AAAS, CD2BP2, CPSF1, EIF4E, GTF2F2, HNRNPA1, HNRNPA2B1, HNRNPH1, HNRNPU, LSM2, MAGOH, NCBP1, NCBP2, NUP133, NUP37, NUP62, NUP85, NUP88, NUP93, POLR2C, POLR2D, POLR2I, POLR2K, PRPF4, RAE1, RNPS1, SF3A3, SMC1A, SNRNP40, SNRPB, SNRPD2, SNRPE, SNRPG, SRSF1, SRSF3, SRSF6, U2AF1	--	YES	--	YES	--	--	--	--	YES	0.00042808	0.062677	0.0071604	0.021405	0.71293	0.62561	0.722222	0.75	0.694444	AAAS, CD2BP2, CPSF1, EIF4E, GTF2F2, HNRNPA1, HNRNPA2B1, HNRNPH1, HNRNPU, LSM2, MAGOH, NCBP1, NCBP2, NUP133, NUP37, NUP62, NUP85, NUP88, NUP93, POLR2C, POLR2D, POLR2I, POLR2K, PRPF4, RAE1, RNPS1, SF3A3, SMC1A, SNRNP40, SNRPB, SNRPD2, SNRPE, SNRPG, SRSF1, SRSF3, SRSF6, U2AF1	no
REACTOME_ASPARAGINE_N_LINKED_GLYCOSYLATION	--	--	--	--	--	YES	--	--	YES	0.000625	NA	0.39641	NA	0.94527	0.461538	0.461538	B4GALT1, B4GALT2, CALR, CANX, DPM1, DPM2, EDEM1, MLEC, MPI, PMM2, RPN1, RPN2, SAR1B, ST6GAL1	--	--	--	--	--	YES	--	--	YES	0.000625	0.60683	0.2576	0.026251	1	0.87034	0.692308	0.461538	0.538462	B4GALT1, B4GALT2, CALR, CANX, DPM1, DPM2, EDEM1, MLEC, MPI, PMM2, RPN1, RPN2, SAR1B, ST6GAL1	no
REACTOME_CELL_CYCLE_MITOTIC	--	--	--	--	--	YES	--	--	YES	0.00069816	0.88147	0.68704	0.957	0.94476	0.514925	0.537313	ANAPC2, AURKA, AURKB, BIRC5, BUB1, BUB1B, CASC5, CCNA1, CCNA2, CCNB1, CCNB2, CCND1, CCND2, CCND3, CCNE2, CCNH, CDC20, CDC25A, CDC25B, CDC25C, CDC45, CDC6, CDCA8, CDK1, CDK2, CDK4, CDK6, CDK7, CDKN1A, CDKN1B, CDKN2A, CDKN2B, CDT1, CENPH, CENPI, CENPK, CENPL, CENPQ, CEP57, CETN2, CKS1B, CSNK1E, CUL1, DCTN1, DHFR, DNA2, DYNLL1, E2F1, E2F2, FBXO5, FEN1, GMNN, HDAC1, HSP90AA1, KIF20A, KIF23, KIF2C, KN…	--	--	--	--	--	YES	--	--	YES	0.00069816	0.21414	0.43638	0.21133	0.94108	0.99082	0.671642	0.604478	0.597015	ANAPC2, AURKA, AURKB, BIRC5, BUB1, BUB1B, CASC5, CCNA1, CCNA2, CCNB1, CCNB2, CCND1, CCND2, CCND3, CCNE2, CCNH, CDC20, CDC25A, CDC25B, CDC25C, CDC45, CDC6, CDCA8, CDK1, CDK2, CDK4, CDK6, CDK7, CDKN1A, CDKN1B, CDKN2A, CDKN2B, CDT1, CENPH, CENPI, CENPK, CENPL, CENPQ, CEP57, CETN2, CKS1B, CSNK1E, CUL1, DCTN1, DHFR, DNA2, DYNLL1, E2F1, E2F2, FBXO5, FEN1, GMNN, HDAC1, HSP90AA1, KIF20A, KIF23, KIF2C, KN…	no
REACTOME_TRANSPORT_OF_MATURE_MRNA_DERIVED_FROM_AN_INTRONLESS_TRANSCRIPT	--	--	--	--	--	YES	--	--	YES	0.00081152	0.14514	0.15103	0.77721	0.80572	0.727273	0.636364	AAAS, CPSF1, EIF4E, NCBP1, NCBP2, NUP133, NUP37, NUP62, NUP85, NUP88, NUP93, RAE1	--	YES	--	YES	--	--	--	--	YES	0.00081152	0.07189	0.040311	0.047655	0.63279	0.87717	0.909091	0.909091	0.909091	AAAS, CPSF1, EIF4E, NCBP1, NCBP2, NUP133, NUP37, NUP62, NUP85, NUP88, NUP93, RAE1	no
REACTOME_MITOTIC_M_M_G1_PHASES	--	--	--	--	--	YES	--	--	YES	0.00090212	0.97051	0.52913	0.97603	0.97009	0.519481	0.558442	AURKB, BIRC5, BUB1, BUB1B, CASC5, CDC20, CDC45, CDC6, CDCA8, CDK2, CDT1, CENPH, CENPI, CENPK, CENPL, CENPQ, E2F1, E2F2, FBXO5, GMNN, KIF20A, KIF23, KIF2C, KNTC1, MCM10, MCM2, MCM3, MCM4, MCM5, MCM6, MCM7, MCM8, NDC80, NUF2, NUP133, NUP37, NUP85, ORC1, ORC6, PAFAH1B1, PLK1, POLE, POLE2, PPP2CA, PPP2R5A, PPP2R5E, PRIM1, PSMA2, PSMB10, PSMB4, PSMB8, PSMB9, PSMC1, PSMC4, PSMD10, PSMD12, PSMD14, PSMD2…	--	--	--	--	--	YES	--	--	YES	0.00090212	0.25637	0.29887	0.09707	0.94232	0.90602	0.727273	0.61039	0.61039	AURKB, BIRC5, BUB1, BUB1B, CASC5, CDC20, CDC45, CDC6, CDCA8, CDK2, CDT1, CENPH, CENPI, CENPK, CENPL, CENPQ, E2F1, E2F2, FBXO5, GMNN, KIF20A, KIF23, KIF2C, KNTC1, MCM10, MCM2, MCM3, MCM4, MCM5, MCM6, MCM7, MCM8, NDC80, NUF2, NUP133, NUP37, NUP85, ORC1, ORC6, PAFAH1B1, PLK1, POLE, POLE2, PPP2CA, PPP2R5A, PPP2R5E, PRIM1, PSMA2, PSMB10, PSMB4, PSMB8, PSMB9, PSMC1, PSMC4, PSMD10, PSMD12, PSMD14, PSMD2…	no
REACTOME_TRANSCRIPTION	--	--	--	--	--	YES	--	--	YES	0.0015201	0.34457	0.60984	0.83065	0.94888	0.541667	0.5625	CCNH, CDK7, CPSF1, GTF2A2, GTF2B, GTF2E2, GTF2F2, H2AFX, H2AFZ, HIST1H2AC, HIST1H2BB, HIST1H2BC, HIST1H2BD, HIST1H2BE, HIST1H2BG, HIST1H2BI, HIST1H2BM, HIST1H2BN, HIST1H2BO, HIST1H3B, HIST1H3D, HIST1H3J, HIST2H3D, MAGOH, MAPK3, MNAT1, NCBP1, NCBP2, NFIB, POLR1C, POLR1D, POLR2C, POLR2D, POLR2I, POLR2K, POLR3B, RNMT, RNPS1, SNRPB, SNRPE, SNRPG, SRSF1, SRSF3, SRSF6, SSRP1, TBP, TCEB1, TFAM, U2AF1	--	--	--	--	--	YES	--	--	YES	0.0015201	0.14189	0.10648	0.10369	0.86478	0.83077	0.6875	0.645833	0.666667	CCNH, CDK7, CPSF1, GTF2A2, GTF2B, GTF2E2, GTF2F2, H2AFX, H2AFZ, HIST1H2AC, HIST1H2BB, HIST1H2BC, HIST1H2BD, HIST1H2BE, HIST1H2BG, HIST1H2BI, HIST1H2BM, HIST1H2BN, HIST1H2BO, HIST1H3B, HIST1H3D, HIST1H3J, HIST2H3D, MAGOH, MAPK3, MNAT1, NCBP1, NCBP2, NFIB, POLR1C, POLR1D, POLR2C, POLR2D, POLR2I, POLR2K, POLR3B, RNMT, RNPS1, SNRPB, SNRPE, SNRPG, SRSF1, SRSF3, SRSF6, SSRP1, TBP, TCEB1, TFAM, U2AF1	no
REACTOME_RNA_POL_I_RNA_POL_III_AND_MITOCHONDRIAL_TRANSCRIPTION	--	--	--	--	--	YES	--	--	YES	0.0016942	0.24786	0.47261	0.81293	0.9697	0.538462	0.615385	CCNH, CDK7, H2AFX, H2AFZ, HIST1H2AC, HIST1H2BB, HIST1H2BC, HIST1H2BD, HIST1H2BE, HIST1H2BG, HIST1H2BI, HIST1H2BM, HIST1H2BN, HIST1H2BO, HIST1H3B, HIST1H3D, HIST1H3J, HIST2H3D, MAPK3, MNAT1, NFIB, POLR1C, POLR1D, POLR2K, POLR3B, TBP, TFAM	--	--	--	--	--	YES	--	--	YES	0.0016942	0.152	0.26592	0.082218	0.84828	0.90351	0.730769	0.653846	0.653846	CCNH, CDK7, H2AFX, H2AFZ, HIST1H2AC, HIST1H2BB, HIST1H2BC, HIST1H2BD, HIST1H2BE, HIST1H2BG, HIST1H2BI, HIST1H2BM, HIST1H2BN, HIST1H2BO, HIST1H3B, HIST1H3D, HIST1H3J, HIST2H3D, MAPK3, MNAT1, NFIB, POLR1C, POLR1D, POLR2K, POLR3B, TBP, TFAM	no
REACTOME_REGULATION_OF_MITOTIC_CELL_CYCLE	--	--	--	--	--	YES	--	--	YES	0.0017123	NA	NA	NA	NA	0.472222	0.527778	ANAPC2, AURKA, AURKB, BUB1B, CCNA1, CCNA2, CCNB1, CDC20, CDK1, CDK2, CUL1, FBXO5, PLK1, PSMA2, PSMB10, PSMB4, PSMB8, PSMB9, PSMC1, PSMC4, PSMD10, PSMD12, PSMD14, PSMD2, PSMD4, PSMD6, PSMD8, PSMD9, PSME1, PSME2, PSMF1, RPS27A, SKP1, SKP2, UBE2C, UBE2D1, UBE2E1	--	--	--	--	--	YES	--	--	YES	0.0017123	NA	NA	0.094811	NA	NA	0.638889	0.583333	0.555556	ANAPC2, AURKA, AURKB, BUB1B, CCNA1, CCNA2, CCNB1, CDC20, CDK1, CDK2, CUL1, FBXO5, PLK1, PSMA2, PSMB10, PSMB4, PSMB8, PSMB9, PSMC1, PSMC4, PSMD10, PSMD12, PSMD14, PSMD2, PSMD4, PSMD6, PSMD8, PSMD9, PSME1, PSME2, PSMF1, RPS27A, SKP1, SKP2, UBE2C, UBE2D1, UBE2E1	no
REACTOME_AMYLOIDS	--	--	--	--	--	YES	--	--	YES	0.0018888	0.11535	0.25861	0.77192	0.89501	0.56	0.72	APCS, APOA1, APP, FGA, H2AFX, H2AFZ, HIST1H2AC, HIST1H2BB, HIST1H2BC, HIST1H2BD, HIST1H2BE, HIST1H2BG, HIST1H2BI, HIST1H2BM, HIST1H2BN, HIST1H2BO, HIST1H3B, HIST1H3D, HIST1H3J, HIST2H3D, INS, LYZ, PRL, SAA1, SNCA, TTR	--	YES	YES	--	--	--	--	--	YES	0.0018888	0.02701	0.45821	0.10022	0.4671	0.99644	0.8	0.76	0.76	APCS, APOA1, APP, FGA, H2AFX, H2AFZ, HIST1H2AC, HIST1H2BB, HIST1H2BC, HIST1H2BD, HIST1H2BE, HIST1H2BG, HIST1H2BI, HIST1H2BM, HIST1H2BN, HIST1H2BO, HIST1H3B, HIST1H3D, HIST1H3J, HIST2H3D, INS, LYZ, PRL, SAA1, SNCA, TTR	no
REACTOME_DNA_REPLICATION	--	--	--	--	--	YES	--	--	YES	0.0020562	0.96188	0.70223	0.97827	0.94929	0.511111	0.544444	AURKB, BIRC5, BUB1, BUB1B, CASC5, CCNA1, CCNA2, CDC20, CDC45, CDC6, CDCA8, CDK2, CDKN1A, CDKN1B, CDT1, CENPH, CENPI, CENPK, CENPL, CENPQ, DNA2, E2F1, E2F2, FBXO5, FEN1, GMNN, KIF20A, KIF23, KIF2C, KNTC1, LIG1, MCM10, MCM2, MCM3, MCM4, MCM5, MCM6, MCM7, MCM8, NDC80, NUF2, NUP133, NUP37, NUP85, ORC1, ORC6, PAFAH1B1, PCPLK1, POLD4, POLE, POLE2, PPP2CA, PPP2R5A, PPP2R5E, PRIM1, PSMA2, PSMB10, PSMB4, …	--	--	--	--	--	YES	--	--	YES	0.0020562	0.3128	0.63611	0.18639	0.97712	0.96716	0.711111	0.611111	0.611111	AURKB, BIRC5, BUB1, BUB1B, CASC5, CCNA1, CCNA2, CDC20, CDC45, CDC6, CDCA8, CDK2, CDKN1A, CDKN1B, CDT1, CENPH, CENPI, CENPK, CENPL, CENPQ, DNA2, E2F1, E2F2, FBXO5, FEN1, GMNN, KIF20A, KIF23, KIF2C, KNTC1, LIG1, MCM10, MCM2, MCM3, MCM4, MCM5, MCM6, MCM7, MCM8, NDC80, NUF2, NUP133, NUP37, NUP85, ORC1, ORC6, PAFAH1B1, PCPLK1, POLD4, POLE, POLE2, PPP2CA, PPP2R5A, PPP2R5E, PRIM1, PSMA2, PSMB10, PSMB4, …	no
REACTOME_MITOTIC_G1_G1_S_PHASES	--	--	--	--	--	YES	--	--	YES	0.002468	0.67512	0.45788	0.93943	0.96893	0.5	0.541667	CCNA1, CCNA2, CCNB1, CCND1, CCND2, CCND3, CCNE2, CCNH, CDC25A, CDC45, CDC6, CDK1, CDK2, CDK4, CDK6, CDK7, CDKN1A, CDKN1B, CDKN2A, CDKN2B, CDT1, CKS1B, CUL1, DHFR, E2F1, E2F2, FBXO5, HDAC1, MCM10, MCM2, MCM3, MCM4, MCM5, MCM6, MCM7, MCM8, MNAT1, MYBL2, MYC, ORC1, ORC6, PCPOLE, POLE2, PPP2CA, PRIM1, PSMA2, PSMB10, PSMB4, PSMB8, PSMB9, PSMC1, PSMC4, PSMD10, PSMD12, PSMD14, PSMD2, PSMD4, PSMD6, PSMD8…	--	--	--	--	--	YES	--	--	YES	0.002468	0.38338	0.64714	0.22581	0.98517	0.95931	0.694444	0.611111	0.583333	CCNA1, CCNA2, CCNB1, CCND1, CCND2, CCND3, CCNE2, CCNH, CDC25A, CDC45, CDC6, CDK1, CDK2, CDK4, CDK6, CDK7, CDKN1A, CDKN1B, CDKN2A, CDKN2B, CDT1, CKS1B, CUL1, DHFR, E2F1, E2F2, FBXO5, HDAC1, MCM10, MCM2, MCM3, MCM4, MCM5, MCM6, MCM7, MCM8, MNAT1, MYBL2, MYC, ORC1, ORC6, PCPOLE, POLE2, PPP2CA, PRIM1, PSMA2, PSMB10, PSMB4, PSMB8, PSMB9, PSMC1, PSMC4, PSMD10, PSMD12, PSMD14, PSMD2, PSMD4, PSMD6, PSMD8…	no
REACTOME_MRNA_PROCESSING	--	--	--	--	--	YES	--	--	YES	0.0027438	0.55291	0.24233	0.91488	0.8858	0.525	0.525	AAAS, CCNH, CD2BP2, CDK7, CPSF1, EIF4E, GTF2F2, HNRNPA1, HNRNPA2B1, HNRNPH1, HNRNPU, LSM2, MAGOH, MNAT1, NCBP1, NCBP2, NUP133, NUP37, NUP62, NUP85, NUP88, NUP93, POLR2C, POLR2D, POLR2I, POLR2K, PRPF4, RAE1, RNMT, RNPS1, SF3A3, SMC1A, SNRNP40, SNRPB, SNRPD2, SNRPE, SNRPG, SRSF1, SRSF3, SRSF6, U2AF1	--	YES	--	YES	--	--	--	--	YES	0.0027438	0.075672	0.0048656	0.10826	0.77997	0.91836	0.65	0.7	0.65	AAAS, CCNH, CD2BP2, CDK7, CPSF1, EIF4E, GTF2F2, HNRNPA1, HNRNPA2B1, HNRNPH1, HNRNPU, LSM2, MAGOH, MNAT1, NCBP1, NCBP2, NUP133, NUP37, NUP62, NUP85, NUP88, NUP93, POLR2C, POLR2D, POLR2I, POLR2K, PRPF4, RAE1, RNMT, RNPS1, SF3A3, SMC1A, SNRNP40, SNRPB, SNRPD2, SNRPE, SNRPG, SRSF1, SRSF3, SRSF6, U2AF1	no
REACTOME_GLUCOSE_TRANSPORT	--	--	--	--	--	YES	--	--	YES	0.0033223	0.10577	0.055156	0.77182	0.72523	0.666667	0.75	AAAS, G6PC, HK1, NUP133, NUP37, NUP62, NUP85, NUP88, NUP93, RAE1, SLC2A2, SLC2A3, SLC37A4	--	--	--	--	--	YES	--	--	YES	0.0033223	0.23293	0.17099	0.08203	0.89819	0.81625	1	0.666667	0.75	AAAS, G6PC, HK1, NUP133, NUP37, NUP62, NUP85, NUP88, NUP93, RAE1, SLC2A2, SLC2A3, SLC37A4	no
KEGG_ANTIGEN_PROCESSING_AND_PRESENTATION	--	--	--	--	--	YES	--	--	YES	0.0036459	0.55327	0.16949	0.92292	0.86922	0.555556	0.5	CALR, CANX, CD4, CD74, CD8B, CREB1, CTSS, HSP90AA1, HSP90AB1, HSPA1A, HSPA1B, HSPA1L, HSPA2, HSPA4, HSPA5, HSPA8, LGMN, PSME1, PSME2	--	--	--	--	--	YES	--	--	YES	0.0036459	0.39875	0.2098	0.098186	0.9856	0.87482	0.666667	0.611111	0.611111	CALR, CANX, CD4, CD74, CD8B, CREB1, CTSS, HSP90AA1, HSP90AB1, HSPA1A, HSPA1B, HSPA1L, HSPA2, HSPA4, HSPA5, HSPA8, LGMN, PSME1, PSME2	no
REACTOME_CELL_CYCLE_CHECKPOINTS	--	--	--	--	--	YES	--	--	YES	0.0048405	NA	NA	NA	NA	0.5	0.517857	ANAPC2, BUB1B, CCNB1, CCNB2, CCNE2, CDC20, CDC25A, CDC25C, CDC45, CDC6, CDK1, CDK2, CDKN1A, CDKN1B, CHEK1, CHEK2, MCM10, MCM2, MCM3, MCM4, MCM5, MCM6, MCM7, MCM8, MDM2, ORC1, ORC6, PSMA2, PSMB10, PSMB4, PSMB8, PSMB9, PSMC1, PSMC4, PSMD10, PSMD12, PSMD14, PSMD2, PSMD4, PSMD6, PSMD8, PSMD9, PSME1, PSME2, PSMF1, RAD9A, RFC3, RFC4, RFC5, RPA1, RPA2, RPA3, RPS27A, TP53, UBE2C, UBE2D1, UBE2E1	--	--	--	--	--	YES	--	--	YES	0.0048405	0.98959	NA	0.23357	1	NA	0.732143	0.589286	0.571429	ANAPC2, BUB1B, CCNB1, CCNB2, CCNE2, CDC20, CDC25A, CDC25C, CDC45, CDC6, CDK1, CDK2, CDKN1A, CDKN1B, CHEK1, CHEK2, MCM10, MCM2, MCM3, MCM4, MCM5, MCM6, MCM7, MCM8, MDM2, ORC1, ORC6, PSMA2, PSMB10, PSMB4, PSMB8, PSMB9, PSMC1, PSMC4, PSMD10, PSMD12, PSMD14, PSMD2, PSMD4, PSMD6, PSMD8, PSMD9, PSME1, PSME2, PSMF1, RAD9A, RFC3, RFC4, RFC5, RPA1, RPA2, RPA3, RPS27A, TP53, UBE2C, UBE2D1, UBE2E1	no
REACTOME_RNA_POL_I_TRANSCRIPTION	--	--	--	--	--	YES	--	--	YES	0.0051392	0.35735	0.82436	0.83196	0.9649	0.545455	0.636364	CCNH, CDK7, H2AFX, H2AFZ, HIST1H2AC, HIST1H2BB, HIST1H2BC, HIST1H2BD, HIST1H2BE, HIST1H2BG, HIST1H2BI, HIST1H2BM, HIST1H2BN, HIST1H2BO, HIST1H3B, HIST1H3D, HIST1H3J, HIST2H3D, MAPK3, MNAT1, POLR1C, POLR1D, POLR2K	--	--	--	--	--	YES	--	--	YES	0.0051392	0.16897	0.54519	0.12487	0.85693	0.98185	0.727273	0.681818	0.636364	CCNH, CDK7, H2AFX, H2AFZ, HIST1H2AC, HIST1H2BB, HIST1H2BC, HIST1H2BD, HIST1H2BE, HIST1H2BG, HIST1H2BI, HIST1H2BM, HIST1H2BN, HIST1H2BO, HIST1H3B, HIST1H3D, HIST1H3J, HIST2H3D, MAPK3, MNAT1, POLR1C, POLR1D, POLR2K	no
REACTOME_NEP_NS2_INTERACTS_WITH_THE_CELLULAR_EXPORT_MACHINERY	--	--	--	--	--	YES	--	--	YES	0.0053333	0.092108	0.090492	0.72548	0.66244	0.625	0.75	AAAS, NUP133, NUP37, NUP62, NUP85, NUP88, NUP93, RAE1, RAN	--	--	--	--	--	YES	--	--	YES	0.0053333	0.17373	0.095719	0.12747	0.80645	0.75587	1	0.875	0.875	AAAS, NUP133, NUP37, NUP62, NUP85, NUP88, NUP93, RAE1, RAN	no
REACTOME_TRANSPORT_OF_RIBONUCLEOPROTEINS_INTO_THE_HOST_NUCLEUS	--	--	--	--	--	YES	--	--	YES	0.0053333	0.12721	0.16305	0.75953	0.80839	0.625	0.75	AAAS, KPNB1, NUP133, NUP37, NUP62, NUP85, NUP88, NUP93, RAE1	--	--	--	--	--	YES	--	--	YES	0.0053333	0.21025	0.074111	0.12108	0.84849	0.78648	1	0.875	0.75	AAAS, KPNB1, NUP133, NUP37, NUP62, NUP85, NUP88, NUP93, RAE1	no
REACTOME_M_G1_TRANSITION	--	--	--	--	--	YES	--	--	YES	0.0060462	NA	NA	NA	NA	0.487805	0.512195	CDC45, CDC6, CDK2, CDT1, E2F1, E2F2, GMNN, MCM10, MCM2, MCM3, MCM4, MCM5, MCM6, MCM7, MCM8, ORC1, ORC6, POLE, POLE2, PRIM1, PSMA2, PSMB10, PSMB4, PSMB8, PSMB9, PSMC1, PSMC4, PSMD10, PSMD12, PSMD14, PSMD2, PSMD4, PSMD6, PSMD8, PSMD9, PSME1, PSME2, PSMF1, RPA1, RPA2, RPA3, RPS27A	--	--	--	--	--	YES	--	--	YES	0.0060462	0.73117	0.8869	0.25323	1	1	0.780488	0.634146	0.585366	CDC45, CDC6, CDK2, CDT1, E2F1, E2F2, GMNN, MCM10, MCM2, MCM3, MCM4, MCM5, MCM6, MCM7, MCM8, ORC1, ORC6, POLE, POLE2, PRIM1, PSMA2, PSMB10, PSMB4, PSMB8, PSMB9, PSMC1, PSMC4, PSMD10, PSMD12, PSMD14, PSMD2, PSMD4, PSMD6, PSMD8, PSMD9, PSME1, PSME2, PSMF1, RPA1, RPA2, RPA3, RPS27A	no
REACTOME_RNA_POL_I_PROMOTER_OPENING	--	--	--	--	--	YES	--	--	YES	0.0064637	0.36422	0.4518	0.83366	0.97111	0.5	0.625	H2AFX, H2AFZ, HIST1H2AC, HIST1H2BB, HIST1H2BC, HIST1H2BD, HIST1H2BE, HIST1H2BG, HIST1H2BI, HIST1H2BM, HIST1H2BN, HIST1H2BO, HIST1H3B, HIST1H3D, HIST1H3J, HIST2H3D, MAPK3	--	--	--	--	--	YES	--	--	YES	0.0064637	0.26293	0.91487	0.12162	0.90417	1	0.875	0.6875	0.6875	H2AFX, H2AFZ, HIST1H2AC, HIST1H2BB, HIST1H2BC, HIST1H2BD, HIST1H2BE, HIST1H2BG, HIST1H2BI, HIST1H2BM, HIST1H2BN, HIST1H2BO, HIST1H3B, HIST1H3D, HIST1H3J, HIST2H3D, MAPK3	no
PID_PLK1_PATHWAY	--	--	--	--	--	YES	--	--	YES	0.0066381	0.97013	0.33319	0.99785	0.93778	0.409091	0.545455	AURKA, BORA, BUB1, BUB1B, CCNB1, CDC20, CDC25B, CDC25C, CDK1, CENPE, CLSPN, ECT2, FBXO5, KIF20A, NDC80, PAK1, PLK1, PPP2CA, PRC1, RHOA, SGOL1, SPC24, TUBG1	--	--	--	--	--	YES	--	--	YES	0.0066381	0.93815	0.59823	0.17841	1	0.96176	0.727273	0.545455	0.5	AURKA, BORA, BUB1, BUB1B, CCNB1, CDC20, CDC25B, CDC25C, CDK1, CENPE, CLSPN, ECT2, FBXO5, KIF20A, NDC80, PAK1, PLK1, PPP2CA, PRC1, RHOA, SGOL1, SPC24, TUBG1	no
REACTOME_INTERACTIONS_OF_VPR_WITH_HOST_CELLULAR_PROTEINS	--	--	--	--	--	YES	--	--	YES	0.0074013	0.26631	0.47444	0.79712	0.96228	0.6	0.6	AAAS, BANF1, NUP133, NUP37, NUP62, NUP85, NUP88, NUP93, PSIP1, RAE1, SLC25A4	--	YES	--	YES	--	--	--	--	YES	0.0074013	0.12393	0.023019	0.14722	0.75372	0.68142	0.9	0.8	0.8	AAAS, BANF1, NUP133, NUP37, NUP62, NUP85, NUP88, NUP93, PSIP1, RAE1, SLC25A4	no
PID_TCR_PATHWAY	--	YES	--	YES	--	--	--	--	YES	0.0085168	0.074801	0.026421	0.75289	0.55657	0.62963	0.666667	AKT1, CD3D, CD3G, CD4, CD80, CD86, CHUK, CSK, FLFYN, GRB2, HRAS, IKBKB, IKBKG, INPP5D, LAT, MALT1, NCK1, NRAS, PLCG1, PRKCA, PRKCQ, PTPN6, PTPRC, RASSF5, SHC1, TRAF6, WAS	--	YES	--	YES	--	--	--	--	YES	0.0085168	0.1187	0.040369	0.19725	0.8051	0.73408	0.666667	0.444444	0.555556	AKT1, CD3D, CD3G, CD4, CD80, CD86, CHUK, CSK, FLFYN, GRB2, HRAS, IKBKB, IKBKG, INPP5D, LAT, MALT1, NCK1, NRAS, PLCG1, PRKCA, PRKCQ, PTPN6, PTPRC, RASSF5, SHC1, TRAF6, WAS	no
REACTOME_MITOCHONDRIAL_TRNA_AMINOACYLATION	--	--	--	--	--	YES	--	--	YES	0.011126	0.096204	0.26377	0.76591	0.8831	1	1	GARS, IARS2, KARS, YARS2	--	YES	--	YES	--	--	--	--	YES	0.011126	0.081841	0.012668	0.42978	0.77333	0.7615	1	1	1	GARS, IARS2, KARS, YARS2	no
REACTOME_REGULATION_OF_GLUCOKINASE_BY_GLUCOKINASE_REGULATORY_PROTEIN	--	--	--	--	--	YES	--	--	YES	0.012943	0.092538	0.12478	0.753	0.72039	0.714286	0.714286	AAAS, NUP133, NUP37, NUP62, NUP85, NUP88, NUP93, RAE1	--	--	--	--	--	YES	--	--	YES	0.012943	0.21511	0.092076	0.24007	0.8586	0.76242	1	0.857143	0.857143	AAAS, NUP133, NUP37, NUP62, NUP85, NUP88, NUP93, RAE1	no
REACTOME_G2_M_CHECKPOINTS	--	--	--	--	--	YES	--	--	YES	0.013765	0.25713	0.36076	0.81797	0.94871	0.576923	0.576923	CCNB1, CCNB2, CDC25A, CDC25C, CDC45, CDC6, CDK1, CDK2, CHEK1, CHEK2, MCM10, MCM2, MCM3, MCM4, MCM5, MCM6, MCM7, MCM8, ORC1, ORC6, RAD9A, RFC3, RFC4, RFC5, RPA1, RPA2, RPA3	--	--	--	--	--	YES	--	--	YES	0.013765	0.055784	0.23017	0.24264	0.65629	0.87361	0.846154	0.692308	0.653846	CCNB1, CCNB2, CDC25A, CDC25C, CDC45, CDC6, CDK1, CDK2, CHEK1, CHEK2, MCM10, MCM2, MCM3, MCM4, MCM5, MCM6, MCM7, MCM8, ORC1, ORC6, RAD9A, RFC3, RFC4, RFC5, RPA1, RPA2, RPA3	no
REACTOME_ACTIVATION_OF_ATR_IN_RESPONSE_TO_REPLICATION_STRESS	--	--	--	--	--	YES	--	--	YES	0.015203	0.34686	0.3149	0.84781	0.9432	0.590909	0.590909	CDC25A, CDC25C, CDC45, CDC6, CDK2, CHEK1, MCM10, MCM2, MCM3, MCM4, MCM5, MCM6, MCM7, MCM8, ORC1, ORC6, RAD9A, RFC3, RFC4, RFC5, RPA1, RPA2, RPA3	--	--	--	--	--	YES	--	--	YES	0.015203	0.079702	0.38011	0.24556	0.77099	0.94453	0.863636	0.681818	0.636364	CDC25A, CDC25C, CDC45, CDC6, CDK2, CHEK1, MCM10, MCM2, MCM3, MCM4, MCM5, MCM6, MCM7, MCM8, ORC1, ORC6, RAD9A, RFC3, RFC4, RFC5, RPA1, RPA2, RPA3	no
REACTOME_ACTIVATION_OF_THE_PRE_REPLICATIVE_COMPLEX	--	--	--	--	--	YES	--	--	YES	0.015569	0.35335	0.19035	0.83642	0.86885	0.578947	0.578947	CDC45, CDC6, CDK2, CDT1, MCM10, MCM2, MCM3, MCM4, MCM5, MCM6, MCM7, MCM8, ORC1, ORC6, POLE, POLE2, PRIM1, RPA1, RPA2, RPA3	--	--	--	--	--	YES	--	--	YES	0.015569	0.056507	0.28259	0.23938	0.67631	0.9077	0.947368	0.736842	0.684211	CDC45, CDC6, CDK2, CDT1, MCM10, MCM2, MCM3, MCM4, MCM5, MCM6, MCM7, MCM8, ORC1, ORC6, POLE, POLE2, PRIM1, RPA1, RPA2, RPA3	no
REACTOME_INFLUENZA_LIFE_CYCLE	--	--	--	--	--	YES	--	--	YES	0.01574	0.36773	0.4533	0.8387	0.9708	0.52	0.52	AAAS, CALR, CANX, CLTC, GTF2F2, HSP90AA1, HSPA1B, KPNB1, NUP133, NUP37, NUP62, NUP85, NUP88, NUP93, POLR2C, POLR2D, POLR2I, POLR2K, RAE1, RAN, RPL22, RPL3L, RPLP0, RPS27A, RPS5, RPS6	--	YES	--	YES	--	--	--	--	YES	0.01574	0.10593	0.0041896	0.23177	0.78377	1	0.72	0.8	0.72	AAAS, CALR, CANX, CLTC, GTF2F2, HSP90AA1, HSPA1B, KPNB1, NUP133, NUP37, NUP62, NUP85, NUP88, NUP93, POLR2C, POLR2D, POLR2I, POLR2K, RAE1, RAN, RPL22, RPL3L, RPLP0, RPS27A, RPS5, RPS6	no
REACTOME_MEIOTIC_SYNAPSIS	--	--	--	--	--	YES	--	--	YES	0.016599	0.82736	0.97997	0.9791	0.98327	0.428571	0.571429	ACD, BRCA1, H2AFX, H2AFZ, HIST1H2AC, HIST1H2BB, HIST1H2BC, HIST1H2BD, HIST1H2BE, HIST1H2BG, HIST1H2BI, HIST1H2BM, HIST1H2BN, HIST1H2BO, HSPA2, LMNB1, RAD21, SMC1A, SMC3, SYCP1, SYNE2, TERF2IP	--	--	--	--	--	YES	--	--	YES	0.016599	0.59992	0.53788	0.24883	0.99527	0.98318	0.809524	0.666667	0.571429	ACD, BRCA1, H2AFX, H2AFZ, HIST1H2AC, HIST1H2BB, HIST1H2BC, HIST1H2BD, HIST1H2BE, HIST1H2BG, HIST1H2BI, HIST1H2BM, HIST1H2BN, HIST1H2BO, HSPA2, LMNB1, RAD21, SMC1A, SMC3, SYCP1, SYNE2, TERF2IP	no
PID_ATR_PATHWAY	--	--	--	--	--	YES	--	--	YES	0.01822	0.93327	0.22881	0.98983	0.88315	0.625	0.791667	BRCA2, CCNA2, CDC25A, CDC25C, CDC6, CDK2, CHEK1, CLSPN, FANCD2, MCM2, MCM7, MDM2, PLK1, PPP2CA, RAD51, RAD9A, RFC3, RFC4, RFC5, RPA1, RPA2, TIMELESS, TIPIN, TOPBP1, YWHAZ	--	--	--	--	--	YES	--	--	YES	0.01822	0.28819	0.43698	0.2767	0.94487	0.97992	0.791667	0.666667	0.708333	BRCA2, CCNA2, CDC25A, CDC25C, CDC6, CDK2, CHEK1, CLSPN, FANCD2, MCM2, MCM7, MDM2, PLK1, PPP2CA, RAD51, RAD9A, RFC3, RFC4, RFC5, RPA1, RPA2, TIMELESS, TIPIN, TOPBP1, YWHAZ	no
REACTOME_MRNA_SPLICING	--	--	--	--	--	YES	--	--	YES	0.018903	0.79289	0.44134	0.97041	0.96875	0.555556	0.481481	CD2BP2, CPSF1, GTF2F2, HNRNPA1, HNRNPA2B1, HNRNPH1, HNRNPU, LSM2, MAGOH, NCBP1, NCBP2, POLR2C, POLR2D, POLR2I, POLR2K, PRPF4, RNPS1, SF3A3, SMC1A, SNRNP40, SNRPB, SNRPD2, SNRPE, SNRPG, SRSF1, SRSF3, SRSF6, U2AF1	--	--	--	--	--	YES	--	--	YES	0.018903	0.30185	0.064283	0.3171	0.93763	0.78837	0.62963	0.703704	0.62963	CD2BP2, CPSF1, GTF2F2, HNRNPA1, HNRNPA2B1, HNRNPH1, HNRNPU, LSM2, MAGOH, NCBP1, NCBP2, POLR2C, POLR2D, POLR2I, POLR2K, PRPF4, RNPS1, SF3A3, SMC1A, SNRNP40, SNRPB, SNRPD2, SNRPE, SNRPG, SRSF1, SRSF3, SRSF6, U2AF1	no
REACTOME_HOST_INTERACTIONS_OF_HIV_FACTORS	--	--	--	--	--	YES	--	--	YES	0.019289	NA	NA	NA	NA	0.44186	0.488372	AAAS, AP2M1, ARF1, BANF1, CD4, CD8B, FYN, KPNB1, NPM1, NUP133, NUP37, NUP62, NUP85, NUP88, NUP93, PPIA, PSIP1, PSMA2, PSMB10, PSMB4, PSMB8, PSMB9, PSMC1, PSMC4, PSMD10, PSMD12, PSMD14, PSMD2, PSMD4, PSMD6, PSMD8, PSMD9, PSME1, PSME2, PSMF1, RAC1, RAE1, RAN, RANBP1, RCC1, RPS27A, SKP1, SLC25A4, TCEB1	--	--	--	--	--	YES	--	--	YES	0.019289	NA	0.77569	0.4199	NA	0.99229	0.674419	0.627907	0.534884	AAAS, AP2M1, ARF1, BANF1, CD4, CD8B, FYN, KPNB1, NPM1, NUP133, NUP37, NUP62, NUP85, NUP88, NUP93, PPIA, PSIP1, PSMA2, PSMB10, PSMB4, PSMB8, PSMB9, PSMC1, PSMC4, PSMD10, PSMD12, PSMD14, PSMD2, PSMD4, PSMD6, PSMD8, PSMD9, PSME1, PSME2, PSMF1, RAC1, RAE1, RAN, RANBP1, RCC1, RPS27A, SKP1, SLC25A4, TCEB1	no
KEGG_GLYCOSPHINGOLIPID_BIOSYNTHESIS_GANGLIO_SERIES	--	YES	--	YES	--	--	--	--	YES	0.022128	0.14977	0.044796	0.78149	0.71704	0.8	1	GLB1, HEXA, HEXB, ST3GAL1, ST3GAL2, ST3GAL5	--	--	--	--	--	YES	--	--	YES	0.022128	0.23901	0.24768	0.34748	0.86521	0.88016	0.8	0.8	1	GLB1, HEXA, HEXB, ST3GAL1, ST3GAL2, ST3GAL5	no
KEGG_AMINOACYL_TRNA_BIOSYNTHESIS	--	--	--	--	--	YES	--	--	YES	0.023643	0.16469	0.18738	0.76165	0.8524	0.8	0.8	AARS, EPRS, GARS, IARS, IARS2, KARS, LARSRS, RARS, WARS, YARS2	YES	YES	--	--	--	--	--	--	YES	0.023643	0.012007	0.0052964	0.26934	0.30726	0.8247	0.9	0.9	0.9	AARS, EPRS, GARS, IARS, IARS2, KARS, LARSRS, RARS, WARS, YARS2	no
REACTOME_SEMAPHORIN_INTERACTIONS	--	--	--	--	--	YES	--	--	YES	0.024227	0.1661	0.21225	0.75536	0.87759	0.588235	0.764706	ARHGEF12, CDK5R1, CRMP1, ERBB2, FYN, HSP90AA1, HSP90AB1, ITGB1, MET, MYL9, NRP1, PAK1, PLXNB3, PTPRC, RAC1, RAC2, RHOA, TYROBP	--	--	--	--	--	YES	--	--	YES	0.024227	0.068858	0.49529	0.33652	0.68128	0.98062	0.764706	0.705882	0.764706	ARHGEF12, CDK5R1, CRMP1, ERBB2, FYN, HSP90AA1, HSP90AB1, ITGB1, MET, MYL9, NRP1, PAK1, PLXNB3, PTPRC, RAC1, RAC2, RHOA, TYROBP	no
REACTOME_LATE_PHASE_OF_HIV_LIFE_CYCLE	--	--	--	--	--	YES	--	--	YES	0.024615	0.8229	0.33262	0.96939	0.93797	0.483871	0.483871	AAAS, CCNH, CDK7, GTF2A2, GTF2B, GTF2E2, GTF2F2, MNAT1, NCBP1, NCBP2, NMT1, NUP133, NUP37, NUP62, NUP85, NUP88, NUP93, POLR2C, POLR2D, POLR2I, POLR2K, RAE1, RAN, RANBP1, RCC1, RNMT, RPS27A, SSRP1, TBP, TCEB1, TSG101, VPS28	--	--	--	--	--	YES	--	--	YES	0.024615	0.48321	0.058131	0.41119	1	0.77878	0.709677	0.677419	0.741935	AAAS, CCNH, CDK7, GTF2A2, GTF2B, GTF2E2, GTF2F2, MNAT1, NCBP1, NCBP2, NMT1, NUP133, NUP37, NUP62, NUP85, NUP88, NUP93, POLR2C, POLR2D, POLR2I, POLR2K, RAE1, RAN, RANBP1, RCC1, RNMT, RPS27A, SSRP1, TBP, TCEB1, TSG101, VPS28	no
REACTOME_ASSEMBLY_OF_THE_PRE_REPLICATIVE_COMPLEX	--	--	--	--	--	YES	--	--	YES	0.025455	NA	NA	NA	NA	0.46875	0.5	CDC6, CDT1, E2F1, E2F2, GMNN, MCM2, MCM3, MCM4, MCM5, MCM6, MCM7, MCM8, ORC1, ORC6, PSMA2, PSMB10, PSMB4, PSMB8, PSMB9, PSMC1, PSMC4, PSMD10, PSMD12, PSMD14, PSMD2, PSMD4, PSMD6, PSMD8, PSMD9, PSME1, PSME2, PSMF1, RPS27A	--	--	--	--	--	YES	--	--	YES	0.025455	0.83569	0.88142	0.41453	1	0.99089	0.71875	0.625	0.59375	CDC6, CDT1, E2F1, E2F2, GMNN, MCM2, MCM3, MCM4, MCM5, MCM6, MCM7, MCM8, ORC1, ORC6, PSMA2, PSMB10, PSMB4, PSMB8, PSMB9, PSMC1, PSMC4, PSMD10, PSMD12, PSMD14, PSMD2, PSMD4, PSMD6, PSMD8, PSMD9, PSME1, PSME2, PSMF1, RPS27A	no
KEGG_GLYCOSPHINGOLIPID_BIOSYNTHESIS_GLOBO_SERIES	--	YES	--	YES	--	--	--	--	YES	0.026755	0.15801	0.043638	0.76753	0.74541	0.8	1	FUT1, FUT9, HEXA, HEXB, ST3GAL1, ST3GAL2	--	--	--	--	--	YES	--	--	YES	0.026755	0.21537	0.2204	0.38784	0.86344	0.83908	0.6	0.8	1	FUT1, FUT9, HEXA, HEXB, ST3GAL1, ST3GAL2	no
REACTOME_G1_S_TRANSITION	--	--	--	--	--	YES	--	--	YES	0.027285	NA	NA	NA	NA	0.451613	0.516129	CCNA1, CCNA2, CCNB1, CCNE2, CCNH, CDC25A, CDC45, CDC6, CDK1, CDK2, CDK7, CDKN1A, CDKN1B, CDT1, CKS1B, CUL1, DHFR, E2F1, FBXO5, MCM10, MCM2, MCM3, MCM4, MCM5, MCM6, MCM7, MCM8, MNAT1, MYC, ORC1, ORC6, PCPOLE, POLE2, PPP2CA, PRIM1, PSMA2, PSMB10, PSMB4, PSMB8, PSMB9, PSMC1, PSMC4, PSMD10, PSMD12, PSMD14, PSMD2, PSMD4, PSMD6, PSMD8, PSMD9, PSME1, PSME2, PSMF1, RB1, RPA1, RPA2, RPA3, RPS27A, RRM2, SK…	--	--	--	--	--	YES	--	--	YES	0.027285	NA	NA	0.5135	NA	NA	0.677419	0.580645	0.532258	CCNA1, CCNA2, CCNB1, CCNE2, CCNH, CDC25A, CDC45, CDC6, CDK1, CDK2, CDK7, CDKN1A, CDKN1B, CDT1, CKS1B, CUL1, DHFR, E2F1, FBXO5, MCM10, MCM2, MCM3, MCM4, MCM5, MCM6, MCM7, MCM8, MNAT1, MYC, ORC1, ORC6, PCPOLE, POLE2, PPP2CA, PRIM1, PSMA2, PSMB10, PSMB4, PSMB8, PSMB9, PSMC1, PSMC4, PSMD10, PSMD12, PSMD14, PSMD2, PSMD4, PSMD6, PSMD8, PSMD9, PSME1, PSME2, PSMF1, RB1, RPA1, RPA2, RPA3, RPS27A, RRM2, SK…	no
REACTOME_RNA_POL_III_CHAIN_ELONGATION	--	--	--	--	--	YES	--	--	YES	0.028499	0.15626	0.48776	0.76534	0.95384	1	0.666667	POLR1C, POLR1D, POLR2K, POLR3B	--	YES	--	YES	--	--	--	--	YES	0.028499	0.080858	0.029234	0.51147	0.77554	0.81812	0.666667	1	0.666667	POLR1C, POLR1D, POLR2K, POLR3B	no
REACTOME_NUCLEAR_SIGNALING_BY_ERBB4	--	--	--	--	--	YES	--	--	YES	0.028565	0.21156	0.29764	0.78811	0.89466	0.625	0.75	APH1B, CUL1, CXCL12, EREG, ESR1, GHR, JAK2, PGR, PRL, PSEN1, PSEN2, S100B, SKP1, STAT5A, STAT5B, TAB2, YAP1	--	--	--	--	--	YES	--	--	YES	0.028565	0.41787	0.27065	0.31985	0.98516	0.89635	0.8125	0.625	0.6875	APH1B, CUL1, CXCL12, EREG, ESR1, GHR, JAK2, PGR, PRL, PSEN1, PSEN2, S100B, SKP1, STAT5A, STAT5B, TAB2, YAP1	no
REACTOME_S_PHASE	--	--	--	--	--	YES	--	--	YES	0.02894	NA	NA	NA	NA	0.460317	0.52381	CCNA1, CCNA2, CCND1, CCNE2, CCNH, CDC25A, CDC25B, CDC45, CDC6, CDK2, CDK4, CDK7, CDKN1A, CDKN1B, CDT1, CKS1B, CUL1, DNA2, FEN1, LIG1, MCM2, MCM3, MCM4, MCM5, MCM6, MCM7, MCM8, MNAT1, MYC, ORC1, ORC6, PCPOLD4, POLE, POLE2, PRIM1, PSMA2, PSMB10, PSMB4, PSMB8, PSMB9, PSMC1, PSMC4, PSMD10, PSMD12, PSMD14, PSMD2, PSMD4, PSMD6, PSMD8, PSMD9, PSME1, PSME2, PSMF1, RB1, RFC3, RFC4, RFC5, RPA1, RPA2, RPA3,…	--	--	--	--	--	YES	--	--	YES	0.02894	0.66936	NA	0.52626	1	NA	0.698413	0.603175	0.555556	CCNA1, CCNA2, CCND1, CCNE2, CCNH, CDC25A, CDC25B, CDC45, CDC6, CDK2, CDK4, CDK7, CDKN1A, CDKN1B, CDT1, CKS1B, CUL1, DNA2, FEN1, LIG1, MCM2, MCM3, MCM4, MCM5, MCM6, MCM7, MCM8, MNAT1, MYC, ORC1, ORC6, PCPOLD4, POLE, POLE2, PRIM1, PSMA2, PSMB10, PSMB4, PSMB8, PSMB9, PSMC1, PSMC4, PSMD10, PSMD12, PSMD14, PSMD2, PSMD4, PSMD6, PSMD8, PSMD9, PSME1, PSME2, PSMF1, RB1, RFC3, RFC4, RFC5, RPA1, RPA2, RPA3,…	no
REACTOME_HIV_INFECTION	--	--	--	--	--	YES	--	--	YES	0.032315	NA	NA	NA	NA	0.41791	0.432836	AAAS, AP2M1, ARF1, BANF1, CCNH, CCR5, CD4, CD8B, CDK7, CXCR4, FEN1, FYN, GTF2A2, GTF2B, GTF2E2, GTF2F2, KPNB1, LIG1, MNAT1, NCBP1, NCBP2, NMT1, NPM1, NUP133, NUP37, NUP62, NUP85, NUP88, NUP93, POLR2C, POLR2D, POLR2I, POLR2K, PPIA, PSIP1, PSMA2, PSMB10, PSMB4, PSMB8, PSMB9, PSMC1, PSMC4, PSMD10, PSMD12, PSMD14, PSMD2, PSMD4, PSMD6, PSMD8, PSMD9, PSME1, PSME2, PSMF1, RAC1, RAE1, RAN, RANBP1, RCC1, …	--	--	--	--	--	YES	--	--	YES	0.032315	NA	0.63941	0.52759	NA	0.9632	0.626866	0.597015	0.567164	AAAS, AP2M1, ARF1, BANF1, CCNH, CCR5, CD4, CD8B, CDK7, CXCR4, FEN1, FYN, GTF2A2, GTF2B, GTF2E2, GTF2F2, KPNB1, LIG1, MNAT1, NCBP1, NCBP2, NMT1, NPM1, NUP133, NUP37, NUP62, NUP85, NUP88, NUP93, POLR2C, POLR2D, POLR2I, POLR2K, PPIA, PSIP1, PSMA2, PSMB10, PSMB4, PSMB8, PSMB9, PSMC1, PSMC4, PSMD10, PSMD12, PSMD14, PSMD2, PSMD4, PSMD6, PSMD8, PSMD9, PSME1, PSME2, PSMF1, RAC1, RAE1, RAN, RANBP1, RCC1, …	no
KEGG_CELL_CYCLE	--	--	--	--	--	YES	--	--	YES	0.032911	0.52114	0.74083	0.8919	0.95768	0.544118	0.573529	ABL1, ANAPC2, BUB1, BUB1B, CCNA1, CCNA2, CCNB1, CCNB2, CCND1, CCND2, CCND3, CCNE2, CCNH, CDC20, CDC25A, CDC25B, CDC25C, CDC45, CDC6, CDK1, CDK2, CDK4, CDK6, CDK7, CDKN1A, CDKN1B, CDKN2A, CDKN2B, CHEK1, CHEK2, CREBBP, CUL1, E2F1, E2F2, EP300, ESPL1, GADD45A, GADD45B, GADD45G, GSK3B, HDAC1, HDAC2, MCM2, MCM3, MCM4, MCM5, MCM6, MCM7, MDM2, MYC, ORC1, ORC6, PCPLK1, RAD21, RB1, SFN, SKP1, SKP2, SMAD3,…	--	--	--	--	--	YES	--	--	YES	0.032911	0.58144	0.51094	0.54546	1	0.98591	0.676471	0.617647	0.617647	ABL1, ANAPC2, BUB1, BUB1B, CCNA1, CCNA2, CCNB1, CCNB2, CCND1, CCND2, CCND3, CCNE2, CCNH, CDC20, CDC25A, CDC25B, CDC25C, CDC45, CDC6, CDK1, CDK2, CDK4, CDK6, CDK7, CDKN1A, CDKN1B, CDKN2A, CDKN2B, CHEK1, CHEK2, CREBBP, CUL1, E2F1, E2F2, EP300, ESPL1, GADD45A, GADD45B, GADD45G, GSK3B, HDAC1, HDAC2, MCM2, MCM3, MCM4, MCM5, MCM6, MCM7, MDM2, MYC, ORC1, ORC6, PCPLK1, RAD21, RB1, SFN, SKP1, SKP2, SMAD3,…	no
REACTOME_MRNA_3_END_PROCESSING	--	--	--	--	--	YES	--	--	YES	0.033846	0.91768	0.24258	0.99555	0.87114	0.5	0.625	CPSF1, MAGOH, NCBP1, NCBP2, RNPS1, SRSF1, SRSF3, SRSF6, U2AF1	--	--	--	--	--	YES	--	--	YES	0.033846	0.25404	0.24374	0.3475	0.89417	0.87692	0.75	0.875	0.75	CPSF1, MAGOH, NCBP1, NCBP2, RNPS1, SRSF1, SRSF3, SRSF6, U2AF1	no
REACTOME_ORC1_REMOVAL_FROM_CHROMATIN	--	--	--	--	--	YES	--	--	YES	0.03591	NA	NA	NA	NA	0.428571	0.485714	CCNA1, CCNA2, CDC6, CDK2, CDKN1A, CDKN1B, CDT1, MCM2, MCM3, MCM4, MCM5, MCM6, MCM7, MCM8, ORC1, ORC6, PSMA2, PSMB10, PSMB4, PSMB8, PSMB9, PSMC1, PSMC4, PSMD10, PSMD12, PSMD14, PSMD2, PSMD4, PSMD6, PSMD8, PSMD9, PSME1, PSME2, PSMF1, RB1, RPS27A	--	--	--	--	--	YES	--	--	YES	0.03591	NA	NA	0.50063	NA	NA	0.685714	0.571429	0.542857	CCNA1, CCNA2, CDC6, CDK2, CDKN1A, CDKN1B, CDT1, MCM2, MCM3, MCM4, MCM5, MCM6, MCM7, MCM8, ORC1, ORC6, PSMA2, PSMB10, PSMB4, PSMB8, PSMB9, PSMC1, PSMC4, PSMD10, PSMD12, PSMD14, PSMD2, PSMD4, PSMD6, PSMD8, PSMD9, PSME1, PSME2, PSMF1, RB1, RPS27A	no
REACTOME_AMINE_LIGAND_BINDING_RECEPTORS	--	--	--	--	--	YES	--	--	YES	0.037283	0.20506	NA	0.77232	NA	0.666667	0.333333	ADRB2, DRD2, HTR1F, HTR2C	--	--	--	--	--	YES	--	--	YES	0.037283	0.56837	NA	0.50635	1	NA	0.666667	0.666667	0.333333	ADRB2, DRD2, HTR1F, HTR2C	no
REACTOME_HIV_LIFE_CYCLE	--	--	--	--	--	YES	--	--	YES	0.037569	0.9892	0.67174	0.99974	0.95398	0.45	0.425	AAAS, BANF1, CCNH, CCR5, CD4, CDK7, CXCR4, FEN1, GTF2A2, GTF2B, GTF2E2, GTF2F2, LIG1, MNAT1, NCBP1, NCBP2, NMT1, NUP133, NUP37, NUP62, NUP85, NUP88, NUP93, POLR2C, POLR2D, POLR2I, POLR2K, PPIA, PSIP1, RAE1, RAN, RANBP1, RCC1, RNMT, RPS27A, SSRP1, TBP, TCEB1, TSG101, VPS28, XRCC5	--	--	--	--	--	YES	--	--	YES	0.037569	0.38682	0.087813	0.50191	0.98153	0.76724	0.725	0.675	0.7	AAAS, BANF1, CCNH, CCR5, CD4, CDK7, CXCR4, FEN1, GTF2A2, GTF2B, GTF2E2, GTF2F2, LIG1, MNAT1, NCBP1, NCBP2, NMT1, NUP133, NUP37, NUP62, NUP85, NUP88, NUP93, POLR2C, POLR2D, POLR2I, POLR2K, PPIA, PSIP1, RAE1, RAN, RANBP1, RCC1, RNMT, RPS27A, SSRP1, TBP, TCEB1, TSG101, VPS28, XRCC5	no
REACTOME_XENOBIOTICS	--	--	--	--	--	YES	--	--	YES	0.039232	NA	NA	NA	NA	0.333333	0.444444	CYP1A1, CYP1A2, CYP2A6, CYP2B6, CYP2C18, CYP2C8, CYP2C9, CYP2E1, CYP2F1, CYP3A5	--	--	--	--	--	YES	--	--	YES	0.039232	NA	NA	0.38413	NA	NA	0.888889	0.111111	0.333333	CYP1A1, CYP1A2, CYP2A6, CYP2B6, CYP2C18, CYP2C8, CYP2C9, CYP2E1, CYP2F1, CYP3A5	no
REACTOME_POST_TRANSLATIONAL_PROTEIN_MODIFICATION	--	--	--	--	--	YES	--	--	YES	0.040091	NA	0.22765	NA	0.88148	0.518519	0.555556	ARSA, B3GNT2, B3GNT9, B4GALT1, B4GALT2, CALR, CANX, DPM1, DPM2, EDEM1, F2, FURIN, GALNT1, MLEC, MPI, PIGB, PIGF, PMM2, PROS1, RPN1, RPN2, SAR1B, ST3GAL1, ST3GAL2, ST6GAL1, ST6GALNAC2, SUMF1, SUMF2	--	--	--	--	--	YES	--	--	YES	0.040091	NA	0.33436	0.51909	NA	0.90694	0.62963	0.481481	0.518519	ARSA, B3GNT2, B3GNT9, B4GALT1, B4GALT2, CALR, CANX, DPM1, DPM2, EDEM1, F2, FURIN, GALNT1, MLEC, MPI, PIGB, PIGF, PMM2, PROS1, RPN1, RPN2, SAR1B, ST3GAL1, ST3GAL2, ST6GAL1, ST6GALNAC2, SUMF1, SUMF2	no
KEGG_OLFACTORY_TRANSDUCTION	--	--	--	--	--	YES	--	--	YES	0.040904	0.29291	0.2092	0.80885	0.88462	0.666667	0.666667	CAMK2B, CAMK2G, GNAL, PRKACA, PRKACB, PRKG1, PRKX	--	--	--	--	--	YES	--	--	YES	0.040904	0.53436	0.78747	0.42678	1	0.99552	0.666667	0.666667	0.5	CAMK2B, CAMK2G, GNAL, PRKACA, PRKACB, PRKG1, PRKX	no
PID_MYC_ACTIV_PATHWAY	--	--	--	--	--	YES	--	--	YES	0.04345	0.8891	0.53706	0.97852	0.96332	0.612903	0.483871	BAX, BCAT1, BIRC5, CCNB1, CCND2, CDC25A, CDK4, CREBBP, EIF2S1, EIF4E, EIF4G1, EP300, FOSL1, GAPDH, HSP90AA1, HSPA4, HSPD1, ID2, KAT2A, MMP9, MTA1, MYC, NME1, NPM1, PRDX3, RCC1, RUVBL1, SMAD3, SMAD4, TERT, TK1, TP53	YES	YES	--	--	--	--	--	--	YES	0.04345	0.012834	0.035986	0.52022	0.38774	0.71506	0.645161	0.580645	0.548387	BAX, BCAT1, BIRC5, CCNB1, CCND2, CDC25A, CDK4, CREBBP, EIF2S1, EIF4E, EIF4G1, EP300, FOSL1, GAPDH, HSP90AA1, HSPA4, HSPD1, ID2, KAT2A, MMP9, MTA1, MYC, NME1, NPM1, PRDX3, RCC1, RUVBL1, SMAD3, SMAD4, TERT, TK1, TP53	no
REACTOME_NOTCH_HLH_TRANSCRIPTION_PATHWAY	--	YES	--	YES	--	--	--	--	YES	0.044323	0.38254	0.0031244	0.8369	0.66912	1	0.5	CREBBP, KAT2A, NOTCH2	--	--	--	--	--	YES	--	--	YES	0.044323	0.07929	0.12084	0.53766	0.77824	0.8289	0.5	1	0.5	CREBBP, KAT2A, NOTCH2	no
KEGG_SPLICEOSOME	--	--	--	--	--	YES	--	--	YES	0.044388	NA	NA	NA	NA	0.393939	0.515152	CHERP, DDX42, HNRNPA1, HNRNPU, HSPA1A, HSPA1B, HSPA1L, HSPA2, HSPA8, LSM2, LSM3, LSM5, LSM6, MAGOH, NCBP1, NCBP2, PLRG1, PPIE, PPIL1, PRPF4, PUF60, RBM22, SF3A3, SMNDC1, SNRNP40, SNRPB, SNRPD2, SNRPE, SNRPG, SRSF1, SRSF3, SRSF6, TCERG1, U2AF1	--	--	--	--	--	YES	--	--	YES	0.044388	0.37155	0.10438	0.5061	0.97108	0.76426	0.606061	0.636364	0.545455	CHERP, DDX42, HNRNPA1, HNRNPU, HSPA1A, HSPA1B, HSPA1L, HSPA2, HSPA8, LSM2, LSM3, LSM5, LSM6, MAGOH, NCBP1, NCBP2, PLRG1, PPIE, PPIL1, PRPF4, PUF60, RBM22, SF3A3, SMNDC1, SNRNP40, SNRPB, SNRPD2, SNRPE, SNRPG, SRSF1, SRSF3, SRSF6, TCERG1, U2AF1	no
BIOCARTA_TCRA_PATHWAY	--	--	--	--	--	YES	--	--	YES	0.046821	0.23281	0.068419	0.78071	0.69167	1	0.75	CD3D, CD3G, CD4, FYN, PTPRC	--	YES	YES	--	--	--	--	--	YES	0.046821	0.049851	0.23897	0.50456	0.65712	0.86675	1	0.5	0.75	CD3D, CD3G, CD4, FYN, PTPRC	no
REACTOME_SCF_BETA_TRCP_MEDIATED_DEGRADATION_OF_EMI1	--	--	--	--	--	YES	--	--	YES	0.046895	NA	NA	NA	NA	0.363636	0.5	CDC20, CUL1, FBXO5, PSMA2, PSMB10, PSMB4, PSMB8, PSMB9, PSMC1, PSMC4, PSMD10, PSMD12, PSMD14, PSMD2, PSMD4, PSMD6, PSMD8, PSMD9, PSME1, PSME2, PSMF1, RPS27A, SKP1	--	--	--	--	--	YES	--	--	YES	0.046895	NA	NA	0.51537	NA	NA	0.590909	0.5	0.5	CDC20, CUL1, FBXO5, PSMA2, PSMB10, PSMB4, PSMB8, PSMB9, PSMC1, PSMC4, PSMD10, PSMD12, PSMD14, PSMD2, PSMD4, PSMD6, PSMD8, PSMD9, PSME1, PSME2, PSMF1, RPS27A, SKP1	no
KEGG_AUTOIMMUNE_THYROID_DISEASE	--	--	--	--	--	YES	--	--	YES	0.047385	0.83472	0.18497	0.98107	0.81998	0.5	0.875	CD40, CD80, CD86, CGA, FAS, FASLG, GZMB, IL10, IL4	--	--	--	--	--	YES	--	--	YES	0.047385	0.69048	0.53635	0.42362	1	0.97864	1	0.625	0.875	CD40, CD80, CD86, CGA, FAS, FASLG, GZMB, IL10, IL4	no
REACTOME_SYNTHESIS_OF_DNA	--	--	--	--	--	YES	--	--	YES	0.049936	NA	NA	NA	NA	0.44	0.48	CCNA1, CCNA2, CDC45, CDC6, CDK2, CDKN1A, CDKN1B, CDT1, DNA2, FEN1, LIG1, MCM2, MCM3, MCM4, MCM5, MCM6, MCM7, MCM8, ORC1, ORC6, PCPOLD4, POLE, POLE2, PRIM1, PSMA2, PSMB10, PSMB4, PSMB8, PSMB9, PSMC1, PSMC4, PSMD10, PSMD12, PSMD14, PSMD2, PSMD4, PSMD6, PSMD8, PSMD9, PSME1, PSME2, PSMF1, RB1, RFC3, RFC4, RFC5, RPA1, RPA2, RPA3, RPS27A	--	--	--	--	--	YES	--	--	YES	0.049936	0.91305	NA	0.5433	1	NA	0.72	0.6	0.56	CCNA1, CCNA2, CDC45, CDC6, CDK2, CDKN1A, CDKN1B, CDT1, DNA2, FEN1, LIG1, MCM2, MCM3, MCM4, MCM5, MCM6, MCM7, MCM8, ORC1, ORC6, PCPOLD4, POLE, POLE2, PRIM1, PSMA2, PSMB10, PSMB4, PSMB8, PSMB9, PSMC1, PSMC4, PSMD10, PSMD12, PSMD14, PSMD2, PSMD4, PSMD6, PSMD8, PSMD9, PSME1, PSME2, PSMF1, RB1, RFC3, RFC4, RFC5, RPA1, RPA2, RPA3, RPS27A	no
KEGG_GLYCOSAMINOGLYCAN_BIOSYNTHESIS_HEPARAN_SULFATE	--	--	--	--	YES	--	--	--	YES	0.05091	0.031218	0.015655	0.72133	0.54934	0.5	0.5	B3GAT1, EXT1, HS2ST1, HS3ST5, HS6ST2	--	--	--	--	YES	--	--	--	YES	0.05091	0.039325	0.0013905	0.50988	0.63008	0.57318	0.5	0.5	0.5	B3GAT1, EXT1, HS2ST1, HS3ST5, HS6ST2	no
BIOCARTA_MCM_PATHWAY	--	--	--	--	--	--	--	--	--	0.06269	0.074764	0.054429	0.76198	0.7035	0.727273	0.727273	CDC6, CDK2, CDKN1B, CDT1, MCM2, MCM3, MCM4, MCM5, MCM6, MCM7, ORC1, ORC6	--	--	--	--	--	--	YES	--	YES	0.06269	0.044225	0.2131	0.51231	0.49308	0.84455	1	0.818182	0.818182	CDC6, CDK2, CDKN1B, CDT1, MCM2, MCM3, MCM4, MCM5, MCM6, MCM7, ORC1, ORC6	no
PID_IL2_STAT5_PATHWAY	--	--	--	--	YES	--	--	--	YES	0.066916	0.013733	0.041624	0.45102	0.58042	0.785714	0.857143	BCL2L1, CCNA2, CCND2, CCND3, CDK6, FASLG, GRB2, IL2RG, IL4, JAK1, MYC, PIK3CA, SHC1, STAT5A, STAT5B	--	--	--	--	--	--	--	--	--	0.066916	0.56939	0.28508	0.50222	1	0.9088	0.714286	0.571429	0.642857	BCL2L1, CCNA2, CCND2, CCND3, CDK6, FASLG, GRB2, IL2RG, IL4, JAK1, MYC, PIK3CA, SHC1, STAT5A, STAT5B	no
KEGG_PROXIMAL_TUBULE_BICARBONATE_RECLAMATION	--	--	--	--	YES	--	--	--	YES	0.071414	0.0042248	0.014095	0.45786	0.52359	1	1	AQP1, ATP1A1, ATP1A2, ATP1B1, CA4, PCK2	--	--	--	--	--	--	--	--	--	0.071414	0.27901	0.092113	0.50849	0.92612	0.77999	0.8	0.8	1	AQP1, ATP1A1, ATP1A2, ATP1B1, CA4, PCK2	no
BIOCARTA_NO1_PATHWAY	--	--	--	--	--	--	--	YES	YES	0.072396	0.25042	0.034983	0.78271	0.53847	0.555556	0.777778	ACTA1, AKT1, CAV1, HSP90AA1, KDR, NOS3, PRKACB, PRKAR2B, PRKG1, VEGFA	--	--	--	--	--	--	--	--	--	0.072396	0.17301	0.26209	0.50774	0.8286	0.87883	0.555556	0.666667	0.777778	ACTA1, AKT1, CAV1, HSP90AA1, KDR, NOS3, PRKACB, PRKAR2B, PRKG1, VEGFA	no
REACTOME_KERATAN_SULFATE_DEGRADATION	--	--	--	--	--	--	--	YES	YES	0.07524	0.42848	0.0431	0.83861	0.64619	0.75	1	GLB1, HEXA, HEXB, LUM, OGN	--	--	--	--	--	--	--	--	--	0.07524	0.14876	0.45669	0.5285	0.82546	0.94795	0.75	0.75	1	GLB1, HEXA, HEXB, LUM, OGN	no
REACTOME_TRNA_AMINOACYLATION	--	--	--	--	--	--	--	--	--	0.07745	0.19506	0.23621	0.77605	0.86741	0.666667	0.666667	AARS, AIMP1, AIMP2, EPRS, GARS, IARS, IARS2, KARS, LARSRS, RARS, WARS, YARS2	--	--	--	--	YES	--	--	--	YES	0.07745	0.022342	0.023411	0.49645	0.4051	0.66346	0.833333	0.833333	0.916667	AARS, AIMP1, AIMP2, EPRS, GARS, IARS, IARS2, KARS, LARSRS, RARS, WARS, YARS2	no
REACTOME_HORMONE_SENSITIVE_LIPASE_HSL_MEDIATED_TRIACYLGLYCEROL_HYDROLYSIS	--	--	--	--	--	--	--	YES	YES	0.077494	0.20848	0.020084	0.7756	0.68567	0.666667	0.666667	CAV1, FABP4, PRKACA, PRKACB	--	--	--	--	--	--	YES	--	YES	0.077494	0.044855	0.50146	0.5459	0.66239	0.98091	0.666667	0.666667	0.666667	CAV1, FABP4, PRKACA, PRKACB	no
PID_INTEGRIN2_PATHWAY	--	--	--	--	YES	--	--	--	YES	0.083114	0.019604	0.034188	0.44832	0.54827	1	1	C3, FCGR2A, FGA, FGG, ICAM1, ITGAL, ITGB2, PLAU, THY1, VCAM1	--	--	--	--	YES	--	--	--	YES	0.083114	0.024069	0.04279	0.50987	0.4204	0.8582	0.888889	1	0.777778	C3, FCGR2A, FGA, FGG, ICAM1, ITGAL, ITGB2, PLAU, THY1, VCAM1	no
REACTOME_MUSCLE_CONTRACTION	--	--	--	--	YES	--	--	--	YES	0.088515	0.0041068	0.035124	0.30846	0.54592	0.888889	0.666667	ACTA2, ACTG2, ACTN2, ITGB5, MYBPC2, MYH3, MYH8, MYL1, MYL2, MYL3, MYL9, MYLK, NEB, SORBS3, TCAP, TNNC2, TNNI2, TNNT2, VIM	--	--	--	--	--	--	YES	--	YES	0.088515	0.0020812	0.059573	0.534	0.041602	0.76878	0.888889	0.833333	0.666667	ACTA2, ACTG2, ACTN2, ITGB5, MYBPC2, MYH3, MYH8, MYL1, MYL2, MYL3, MYL9, MYLK, NEB, SORBS3, TCAP, TNNC2, TNNI2, TNNT2, VIM	no
KEGG_CYTOKINE_CYTOKINE_RECEPTOR_INTERACTION	--	--	--	--	YES	--	--	--	YES	0.10373	0.022024	0.0054533	0.73449	0.47876	0.619718	0.71831	AMH, CCL11, CCL13, CCL17, CCL2, CCL22, CCL24, CCL27, CCL3L3, CCL4, CCL7, CCR2, CCR5, CCR6, CCR7, CD27, CD40, CNTF, CSF1R, CXCL10, CXCL12, CXCL2, CXCL3, CXCL6, CXCR2, CXCR4, CXCR5, CXCR6, EGF, EGFR, FAS, FASLG, GHR, HGF, IFNAR1, IFNB1, IFNG, IFNGR1, IL10, IL11, IL12B, IL13RA1, IL18, IL1A, IL1B, IL1R1, IL20, IL2RG, IL4, IL4R, IL6, INHBA, KDR, KIT, LTB, LTBR, MET, PDGFA, PDGFB, PF4, PRL, TGFB1, TGFB…	--	--	--	--	--	--	--	--	--	0.10373	0.16851	0.071286	0.70735	0.91659	0.7674	0.647887	0.605634	0.690141	AMH, CCL11, CCL13, CCL17, CCL2, CCL22, CCL24, CCL27, CCL3L3, CCL4, CCL7, CCR2, CCR5, CCR6, CCR7, CD27, CD40, CNTF, CSF1R, CXCL10, CXCL12, CXCL2, CXCL3, CXCL6, CXCR2, CXCR4, CXCR5, CXCR6, EGF, EGFR, FAS, FASLG, GHR, HGF, IFNAR1, IFNB1, IFNG, IFNGR1, IL10, IL11, IL12B, IL13RA1, IL18, IL1A, IL1B, IL1R1, IL20, IL2RG, IL4, IL4R, IL6, INHBA, KDR, KIT, LTB, LTBR, MET, PDGFA, PDGFB, PF4, PRL, TGFB1, TGFB…	no
KEGG_P53_SIGNALING_PATHWAY	--	--	--	--	--	--	YES	--	YES	0.10417	0.028465	0.06393	0.72507	0.69601	0.657895	0.684211	BAX, BBC3, BID, CASP3, CASP8, CCNB1, CCNB2, CCND1, CCND2, CCND3, CCNE2, CCNG1, CDK1, CDK2, CDK4, CDK6, CDKN1A, CDKN2A, CHEK1, CHEK2, CYCS, DDB2, EI24, FAS, GADD45A, GADD45B, GADD45G, IGF1, IGFBP3, MDM2, PPM1D, RRM2, RRM2B, SERPINE1, SESN1, SESN2, SFN, TP53, TSC2	--	--	--	--	--	--	YES	--	YES	0.10417	0.023904	0.054587	0.65148	0.50885	0.78241	0.736842	0.631579	0.631579	BAX, BBC3, BID, CASP3, CASP8, CCNB1, CCNB2, CCND1, CCND2, CCND3, CCNE2, CCNG1, CDK1, CDK2, CDK4, CDK6, CDKN1A, CDKN2A, CHEK1, CHEK2, CYCS, DDB2, EI24, FAS, GADD45A, GADD45B, GADD45G, IGF1, IGFBP3, MDM2, PPM1D, RRM2, RRM2B, SERPINE1, SESN1, SESN2, SFN, TP53, TSC2	yes
REACTOME_SLC_MEDIATED_TRANSMEMBRANE_TRANSPORT	--	--	--	--	--	--	--	--	--	0.10493	0.11932	0.06242	0.77293	0.71153	0.636364	0.75	AAAS, G6PC, HK1, NUP133, NUP37, NUP62, NUP85, NUP88, NUP93, RAE1, SLC16A3, SLC16A7, SLC17A6, SLC18A2, SLC1A2, SLC1A3, SLC1A4, SLC22A1, SLC22A2, SLC22A7, SLC26A2, SLC26A3, SLC27A1, SLC28A2, SLC2A10, SLC2A2, SLC2A3, SLC2A6, SLC30A5, SLC30A7, SLC35A1, SLC35A3, SLC37A4, SLC38A5, SLC39A7, SLC47A1, SLC5A5, SLC5A6, SLC6A15, SLC6A20, SLC6A3, SLC7A11, SLC7A6, SLCO2B1, SLCO4C1	--	--	--	--	--	--	--	YES	YES	0.10493	0.074713	0.036891	0.66551	0.77446	0.75862	0.681818	0.613636	0.727273	AAAS, G6PC, HK1, NUP133, NUP37, NUP62, NUP85, NUP88, NUP93, RAE1, SLC16A3, SLC16A7, SLC17A6, SLC18A2, SLC1A2, SLC1A3, SLC1A4, SLC22A1, SLC22A2, SLC22A7, SLC26A2, SLC26A3, SLC27A1, SLC28A2, SLC2A10, SLC2A2, SLC2A3, SLC2A6, SLC30A5, SLC30A7, SLC35A1, SLC35A3, SLC37A4, SLC38A5, SLC39A7, SLC47A1, SLC5A5, SLC5A6, SLC6A15, SLC6A20, SLC6A3, SLC7A11, SLC7A6, SLCO2B1, SLCO4C1	no
REACTOME_ELONGATION_ARREST_AND_RECOVERY	--	--	--	--	--	--	--	--	--	0.11986	0.17898	0.75102	0.76528	0.96164	1	0.5	GTF2F2, POLR2C, POLR2D, POLR2I, POLR2K, SSRP1, TCEB1	--	--	--	--	--	--	--	YES	YES	0.11986	0.41058	0.047879	0.54259	0.9637	0.68179	0.833333	0.833333	0.833333	GTF2F2, POLR2C, POLR2D, POLR2I, POLR2K, SSRP1, TCEB1	no
KEGG_DNA_REPLICATION	--	--	--	--	--	--	--	--	--	0.14093	0.65796	0.40304	0.95884	0.96099	0.55	0.6	DNA2, FEN1, LIG1, MCM2, MCM3, MCM4, MCM5, MCM6, MCM7, PCPOLD4, POLE, POLE2, PRIM1, RFC3, RFC4, RFC5, RNASEH2A, RPA1, RPA2, RPA3	--	--	--	--	--	--	YES	--	YES	0.14093	0.039294	0.38202	0.66643	0.53499	0.94148	0.9	0.75	0.7	DNA2, FEN1, LIG1, MCM2, MCM3, MCM4, MCM5, MCM6, MCM7, PCPOLD4, POLE, POLE2, PRIM1, RFC3, RFC4, RFC5, RNASEH2A, RPA1, RPA2, RPA3	no
KEGG_O_GLYCAN_BIOSYNTHESIS	--	--	--	--	--	--	--	--	--	0.14289	0.14187	0.1031	0.74961	0.80887	1	1	GALNT1, ST3GAL1, ST3GAL2	--	--	--	--	--	--	YES	--	YES	0.14289	0.042012	0.12064	0.70263	0.76787	0.83498	1	1	1	GALNT1, ST3GAL1, ST3GAL2	no
REACTOME_CYTOKINE_SIGNALING_IN_IMMUNE_SYSTEM	--	--	--	--	--	--	--	YES	YES	0.14638	0.90951	0.0299	0.97086	0.6873	0.505263	0.631579	AAAS, CAMK2B, CASP1, CD44, CDK1, CHUK, CRK, CRKL, CUL1, EGR1, EIF2AK2, EIF4E, EIF4G1, FYN, GBP2, GBP4, GBP6, GHR, GRB2, HGF, HRAS, ICAM1, IFI35, IFIT1, IFIT2, IFIT3, IFITM2, IFITM3, IFNAR1, IFNB1, IFNG, IFNGR1, IKBKB, IKBKG, IL18, IL1A, IL1B, IL1R1, IL2RG, IL6, IRF6, IRF7, IRS1, ISG15, ISG20, JAK1, JAK2, KPNB1, LYN, MAPK1, MAPK3, MX1, MYD88, NFKB2, NRAS, NUP133, NUP37, NUP62, NUP85, NUP88, NUP93,…	--	--	--	--	--	--	--	--	--	0.14638	0.82207	0.22447	0.74019	1	0.91114	0.526316	0.547368	0.589474	AAAS, CAMK2B, CASP1, CD44, CDK1, CHUK, CRK, CRKL, CUL1, EGR1, EIF2AK2, EIF4E, EIF4G1, FYN, GBP2, GBP4, GBP6, GHR, GRB2, HGF, HRAS, ICAM1, IFI35, IFIT1, IFIT2, IFIT3, IFITM2, IFITM3, IFNAR1, IFNB1, IFNG, IFNGR1, IKBKB, IKBKG, IL18, IL1A, IL1B, IL1R1, IL2RG, IL6, IRF6, IRF7, IRS1, ISG15, ISG20, JAK1, JAK2, KPNB1, LYN, MAPK1, MAPK3, MX1, MYD88, NFKB2, NRAS, NUP133, NUP37, NUP62, NUP85, NUP88, NUP93,…	no
PID_GLYPICAN_1PATHWAY	--	--	--	--	YES	--	--	--	YES	0.14679	0.028202	0.0013763	0.51454	0.10912	1	1	APP, FGF2, FYN, GPC1, LYN, SRC, TGFB1, TGFB3, TGFBR1, TGFBR2, VEGFA	--	--	--	--	--	--	YES	--	YES	0.14679	0.018315	0.13241	0.6217	0.41327	0.7471	0.8	0.9	0.9	APP, FGF2, FYN, GPC1, LYN, SRC, TGFB1, TGFB3, TGFBR1, TGFBR2, VEGFA	no
REACTOME_CALNEXIN_CALRETICULIN_CYCLE	--	--	--	--	YES	--	--	--	YES	0.15483	0.045238	0.01445	0.76723	0.67089	1	1	CALR, CANX, EDEM1	--	--	--	--	--	--	--	--	--	0.15483	0.085602	0.062797	0.70872	0.78999	0.75624	1	1	1	CALR, CANX, EDEM1	no
REACTOME_SYNTHESIS_SECRETION_AND_INACTIVATION_OF_GIP	--	--	--	--	--	--	YES	--	YES	0.17446	0.046429	0.69615	0.75979	0.95907	0.5	0.5	PCSK1, SPCS2, SPCS3	--	--	--	--	--	--	--	--	--	0.17446	0.1643	0.20899	0.70709	0.85302	0.86622	1	0.5	1	PCSK1, SPCS2, SPCS3	no
REACTOME_METAL_ION_SLC_TRANSPORTERS	--	--	--	--	--	--	YES	--	YES	0.1866	0.022024	0.46885	0.73532	0.9628	1	1	SLC30A5, SLC30A7, SLC39A7	--	--	--	--	--	--	--	--	--	0.1866	0.11657	0.15471	0.69824	0.83243	0.84215	1	1	1	SLC30A5, SLC30A7, SLC39A7	no
REACTOME_ZINC_TRANSPORTERS	--	--	--	--	--	--	YES	--	YES	0.1866	0.022024	0.46885	0.73532	0.9628	1	1	SLC30A5, SLC30A7, SLC39A7	--	--	--	--	--	--	--	--	--	0.1866	0.11657	0.15471	0.69824	0.83243	0.84215	1	1	1	SLC30A5, SLC30A7, SLC39A7	no
REACTOME_MRNA_SPLICING_MINOR_PATHWAY	--	--	--	--	--	--	--	--	--	0.19514	0.79311	0.65823	0.97377	0.96479	0.571429	0.5	GTF2F2, LSM2, NCBP1, NCBP2, POLR2C, POLR2D, POLR2I, POLR2K, SNRNP40, SNRPB, SNRPD2, SNRPE, SNRPG, SRSF1, SRSF6	--	--	--	--	--	--	--	YES	YES	0.19514	0.30634	0.045588	0.71453	0.94586	0.85724	0.642857	0.714286	0.642857	GTF2F2, LSM2, NCBP1, NCBP2, POLR2C, POLR2D, POLR2I, POLR2K, SNRNP40, SNRPB, SNRPD2, SNRPE, SNRPG, SRSF1, SRSF6	no
REACTOME_SIGNALING_BY_HIPPO	--	--	--	--	--	--	--	YES	YES	0.19988	0.4292	0.01645	0.84053	0.68179	0.666667	1	CASP3, MOB1A, TJP1, YAP1	--	--	--	--	--	--	--	--	--	0.19988	0.10486	0.051452	0.71102	0.79658	0.76399	1	0.666667	0.666667	CASP3, MOB1A, TJP1, YAP1	no
REACTOME_ASSOCIATION_OF_TRIC_CCT_WITH_TARGET_PROTEINS_DURING_BIOSYNTHESIS	--	--	--	--	--	--	--	--	--	0.20098	NA	NA	NA	NA	0.5	0.75	AP3M1, CCT5, CCT6A, NOP56, TCP1	--	--	--	--	--	--	YES	--	YES	0.20098	0.009136	0.3238	0.70265	0.42843	0.90936	0.75	0.75	0.75	AP3M1, CCT5, CCT6A, NOP56, TCP1	no
KEGG_VASCULAR_SMOOTH_MUSCLE_CONTRACTION	--	--	--	--	YES	--	--	--	YES	0.20674	0.040641	0.0080782	0.7789	0.27221	0.633333	0.733333	ACTA2, ACTG2, ADCY6, ADCY7, ARHGEF12, CACNA1S, CYP4A11, CYP4A22, GNA11, GNAQ, GNAS, ITPR1, ITPR3, MAPK1, MAPK3, MYL9, MYLK, PLA2G12A, PLA2G2D, PLA2G4A, PLCB3, PRKACA, PRKACB, PRKCA, PRKCD, PRKCH, PRKCQ, PRKG1, PRKX, RAMP2, RHOA	--	--	--	--	--	--	--	--	--	0.20674	0.31163	0.083004	0.73667	0.94113	0.77013	0.5	0.6	0.533333	ACTA2, ACTG2, ADCY6, ADCY7, ARHGEF12, CACNA1S, CYP4A11, CYP4A22, GNA11, GNAQ, GNAS, ITPR1, ITPR3, MAPK1, MAPK3, MYL9, MYLK, PLA2G12A, PLA2G2D, PLA2G4A, PLCB3, PRKACA, PRKACB, PRKCA, PRKCD, PRKCH, PRKCQ, PRKG1, PRKX, RAMP2, RHOA	no
REACTOME_SMOOTH_MUSCLE_CONTRACTION	--	--	--	--	--	--	--	--	--	0.24321	0.11534	0.062753	0.73805	0.65965	1	0.8	ACTA2, ACTG2, ITGB5, MYL9, MYLK, SORBS3	--	--	--	--	YES	--	--	--	YES	0.24321	0.01734	0.043487	0.69577	0.47074	0.66476	0.8	1	0.8	ACTA2, ACTG2, ITGB5, MYL9, MYLK, SORBS3	no
REACTOME_DIABETES_PATHWAYS	--	--	--	--	--	--	--	--	--	0.26805	0.089222	0.12459	0.76537	0.87244	0.632653	0.591837	ACADVL, ATF3, ATF4, ATF6, ATP6V0D1, CALR, CCL2, DCTN1, DDIT3, DIS3, EDEM1, EIF2S1, ERO1L, EXOSC3, EXOSC4, EXOSC7, F2, FKBP14, HERPUD1, HSP90B1, HSPA5, HYOU1, IGF2BP2, IGFBP1, IGFBP3, IGFBP6, INS, KLF4, KLK3, MBTPS1, MBTPS2, MMP1, MMP2, PCSK1, PDIA5, PDIA6, PLG, RAB27A, SHC1, SLC30A5, SLC30A7, SNAP25, SPCS2, SPCS3, STX1A, TATDN2, VAMP2, WFS1, WIPI1, XBP1	--	--	--	--	--	--	--	YES	YES	0.26805	0.34569	0.0090133	0.79081	0.97316	0.70428	0.653061	0.653061	0.673469	ACADVL, ATF3, ATF4, ATF6, ATP6V0D1, CALR, CCL2, DCTN1, DDIT3, DIS3, EDEM1, EIF2S1, ERO1L, EXOSC3, EXOSC4, EXOSC7, F2, FKBP14, HERPUD1, HSP90B1, HSPA5, HYOU1, IGF2BP2, IGFBP1, IGFBP3, IGFBP6, INS, KLF4, KLK3, MBTPS1, MBTPS2, MMP1, MMP2, PCSK1, PDIA5, PDIA6, PLG, RAB27A, SHC1, SLC30A5, SLC30A7, SNAP25, SPCS2, SPCS3, STX1A, TATDN2, VAMP2, WFS1, WIPI1, XBP1	no
BIOCARTA_HDAC_PATHWAY	--	--	--	--	--	--	YES	--	YES	0.27897	0.0057435	0.24377	0.37254	0.86856	0.75	0.75	AKT1, CAMK1, IGF1, IGF1R, INS, MAPK14, MEF2C, PIK3CA, PIK3CG	--	--	--	--	--	--	YES	--	YES	0.27897	0.029459	0.11187	0.74224	0.46456	0.79804	0.75	0.75	0.75	AKT1, CAMK1, IGF1, IGF1R, INS, MAPK14, MEF2C, PIK3CA, PIK3CG	no
REACTOME_UNFOLDED_PROTEIN_RESPONSE	--	--	--	--	--	--	--	--	--	0.27982	0.16512	0.17637	0.77752	0.87625	0.586207	0.62069	ACADVL, ATF3, ATF4, ATF6, ATP6V0D1, CALR, CCL2, DCTN1, DDIT3, DIS3, EDEM1, EIF2S1, EXOSC3, EXOSC4, EXOSC7, FKBP14, HERPUD1, HSP90B1, HSPA5, HYOU1, IGFBP1, MBTPS1, MBTPS2, PDIA5, PDIA6, SHC1, TATDN2, WFS1, WIPI1, XBP1	--	--	--	--	--	--	--	YES	YES	0.27982	0.43966	0.044244	0.78502	0.99761	0.80668	0.655172	0.689655	0.655172	ACADVL, ATF3, ATF4, ATF6, ATP6V0D1, CALR, CCL2, DCTN1, DDIT3, DIS3, EDEM1, EIF2S1, EXOSC3, EXOSC4, EXOSC7, FKBP14, HERPUD1, HSP90B1, HSPA5, HYOU1, IGFBP1, MBTPS1, MBTPS2, PDIA5, PDIA6, SHC1, TATDN2, WFS1, WIPI1, XBP1	no
PID_DELTA_NP63_PATHWAY	--	--	--	--	--	--	YES	--	YES	0.28926	0.015326	0.22011	0.4597	0.87419	0.705882	0.588235	BRCA2, CCNB2, CDKN2A, CEBPD, COL5A1, FASN, GPX2, GSK3B, HELLS, HES1, IGFBP3, IL1A, MDM2, NOTCH1, PPP2R5A, SFN, TOP2A, YAP1	--	--	--	--	--	--	--	YES	YES	0.28926	0.16018	0.019923	0.77958	0.84167	0.69778	0.647059	0.764706	0.823529	BRCA2, CCNB2, CDKN2A, CEBPD, COL5A1, FASN, GPX2, GSK3B, HELLS, HES1, IGFBP3, IL1A, MDM2, NOTCH1, PPP2R5A, SFN, TOP2A, YAP1	no
KEGG_GLIOMA	--	--	--	--	--	--	YES	--	YES	0.30047	0.019842	0.7551	0.54007	0.96578	0.6	0.566667	AKT1, AKT3, CAMK2B, CAMK2G, CCND1, CDK4, CDK6, CDKN1A, CDKN2A, E2F1, E2F2, EGF, EGFR, GRB2, HRAS, IGF1, IGF1R, MAPK1, MAPK3, MDM2, NRAS, PDGFA, PDGFB, PIK3CA, PIK3CG, PIK3R3, PLCG1, PRKCA, RB1, SHC1, TP53	--	--	--	--	--	--	--	--	--	0.30047	0.52868	0.34805	0.79166	1	0.91552	0.5	0.533333	0.566667	AKT1, AKT3, CAMK2B, CAMK2G, CCND1, CDK4, CDK6, CDKN1A, CDKN2A, E2F1, E2F2, EGF, EGFR, GRB2, HRAS, IGF1, IGF1R, MAPK1, MAPK3, MDM2, NRAS, PDGFA, PDGFB, PIK3CA, PIK3CG, PIK3R3, PLCG1, PRKCA, RB1, SHC1, TP53	no
REACTOME_REGULATED_PROTEOLYSIS_OF_P75NTR	--	--	--	--	--	--	YES	--	YES	0.30076	0.042644	0.19772	0.78484	0.88644	0.5	0.75	APH1B, PSEN1, PSEN2, RELA, TRAF6	--	--	--	--	--	--	--	YES	YES	0.30076	0.052036	0.0055622	0.74466	0.63027	0.67058	1	0.75	0.5	APH1B, PSEN1, PSEN2, RELA, TRAF6	no
BIOCARTA_EPHA4_PATHWAY	--	--	--	--	--	--	--	--	--	0.30135	0.10393	0.080131	0.76743	0.66962	0.6	0.8	ACTA1, FYN, ITGB1, L1CAM, LYN, SELP	--	--	--	--	--	--	YES	--	YES	0.30135	0.049064	0.54695	0.74641	0.68184	0.98495	0.4	0.8	0.6	ACTA1, FYN, ITGB1, L1CAM, LYN, SELP	no
BIOCARTA_CTCF_PATHWAY	--	--	--	--	--	--	YES	--	YES	0.30546	0.021111	0.069065	0.44281	0.68271	0.75	0.75	CD79A, CD79B, CDKN1B, CDKN2A, MDM2, MYC, PIK3CA, PIK3CG, PPP2CA, SMAD1, SMAD4, SMAD5, TGFB1, TGFB3, TGFBR1, TGFBR2, TP53	--	--	--	--	--	--	YES	--	YES	0.30546	0.029789	0.10939	0.78421	0.46109	0.78787	0.6875	0.6875	0.625	CD79A, CD79B, CDKN1B, CDKN2A, MDM2, MYC, PIK3CA, PIK3CG, PPP2CA, SMAD1, SMAD4, SMAD5, TGFB1, TGFB3, TGFBR1, TGFBR2, TP53	no
KEGG_JAK_STAT_SIGNALING_PATHWAY	--	--	--	--	--	--	--	YES	YES	0.31277	0.33664	0.046573	0.83774	0.67011	0.547619	0.666667	AKT1, AKT3, BCL2L1, CBLB, CCND1, CCND2, CCND3, CNTF, CREBBP, EP300, GHR, GRB2, IFNAR1, IFNB1, IFNG, IFNGR1, IL10, IL11, IL12B, IL13RA1, IL20, IL2RG, IL4, IL4R, IL6, JAK1, JAK2, MYC, PIK3CA, PIK3CG, PIK3R3, PRL, PTPN6, SOCS1, SOCS2, SOCS3, SPRED2, STAT1, STAT3, STAT5A, STAT5B, TSLP, TYK2	--	--	--	--	--	--	--	--	--	0.31277	0.75444	0.37803	0.80024	1	0.95224	0.595238	0.571429	0.619048	AKT1, AKT3, BCL2L1, CBLB, CCND1, CCND2, CCND3, CNTF, CREBBP, EP300, GHR, GRB2, IFNAR1, IFNB1, IFNG, IFNGR1, IL10, IL11, IL12B, IL13RA1, IL20, IL2RG, IL4, IL4R, IL6, JAK1, JAK2, MYC, PIK3CA, PIK3CG, PIK3R3, PRL, PTPN6, SOCS1, SOCS2, SOCS3, SPRED2, STAT1, STAT3, STAT5A, STAT5B, TSLP, TYK2	no
[truncated: 66 more rows]
